# Supplementary material for: A Retrospective Metabolomics Analysis of Gamma-Hydroxybutyrate in Humans: New Potential Markers and Changes in Metabolism Related to GHB Consumption
Source: Frontiers journal article supplement (doi:10.3389/fphar.2022.816376), 2022-03-03
Supplement: Data_Sheet_1.zip [file Data_Sheet_1.zip]

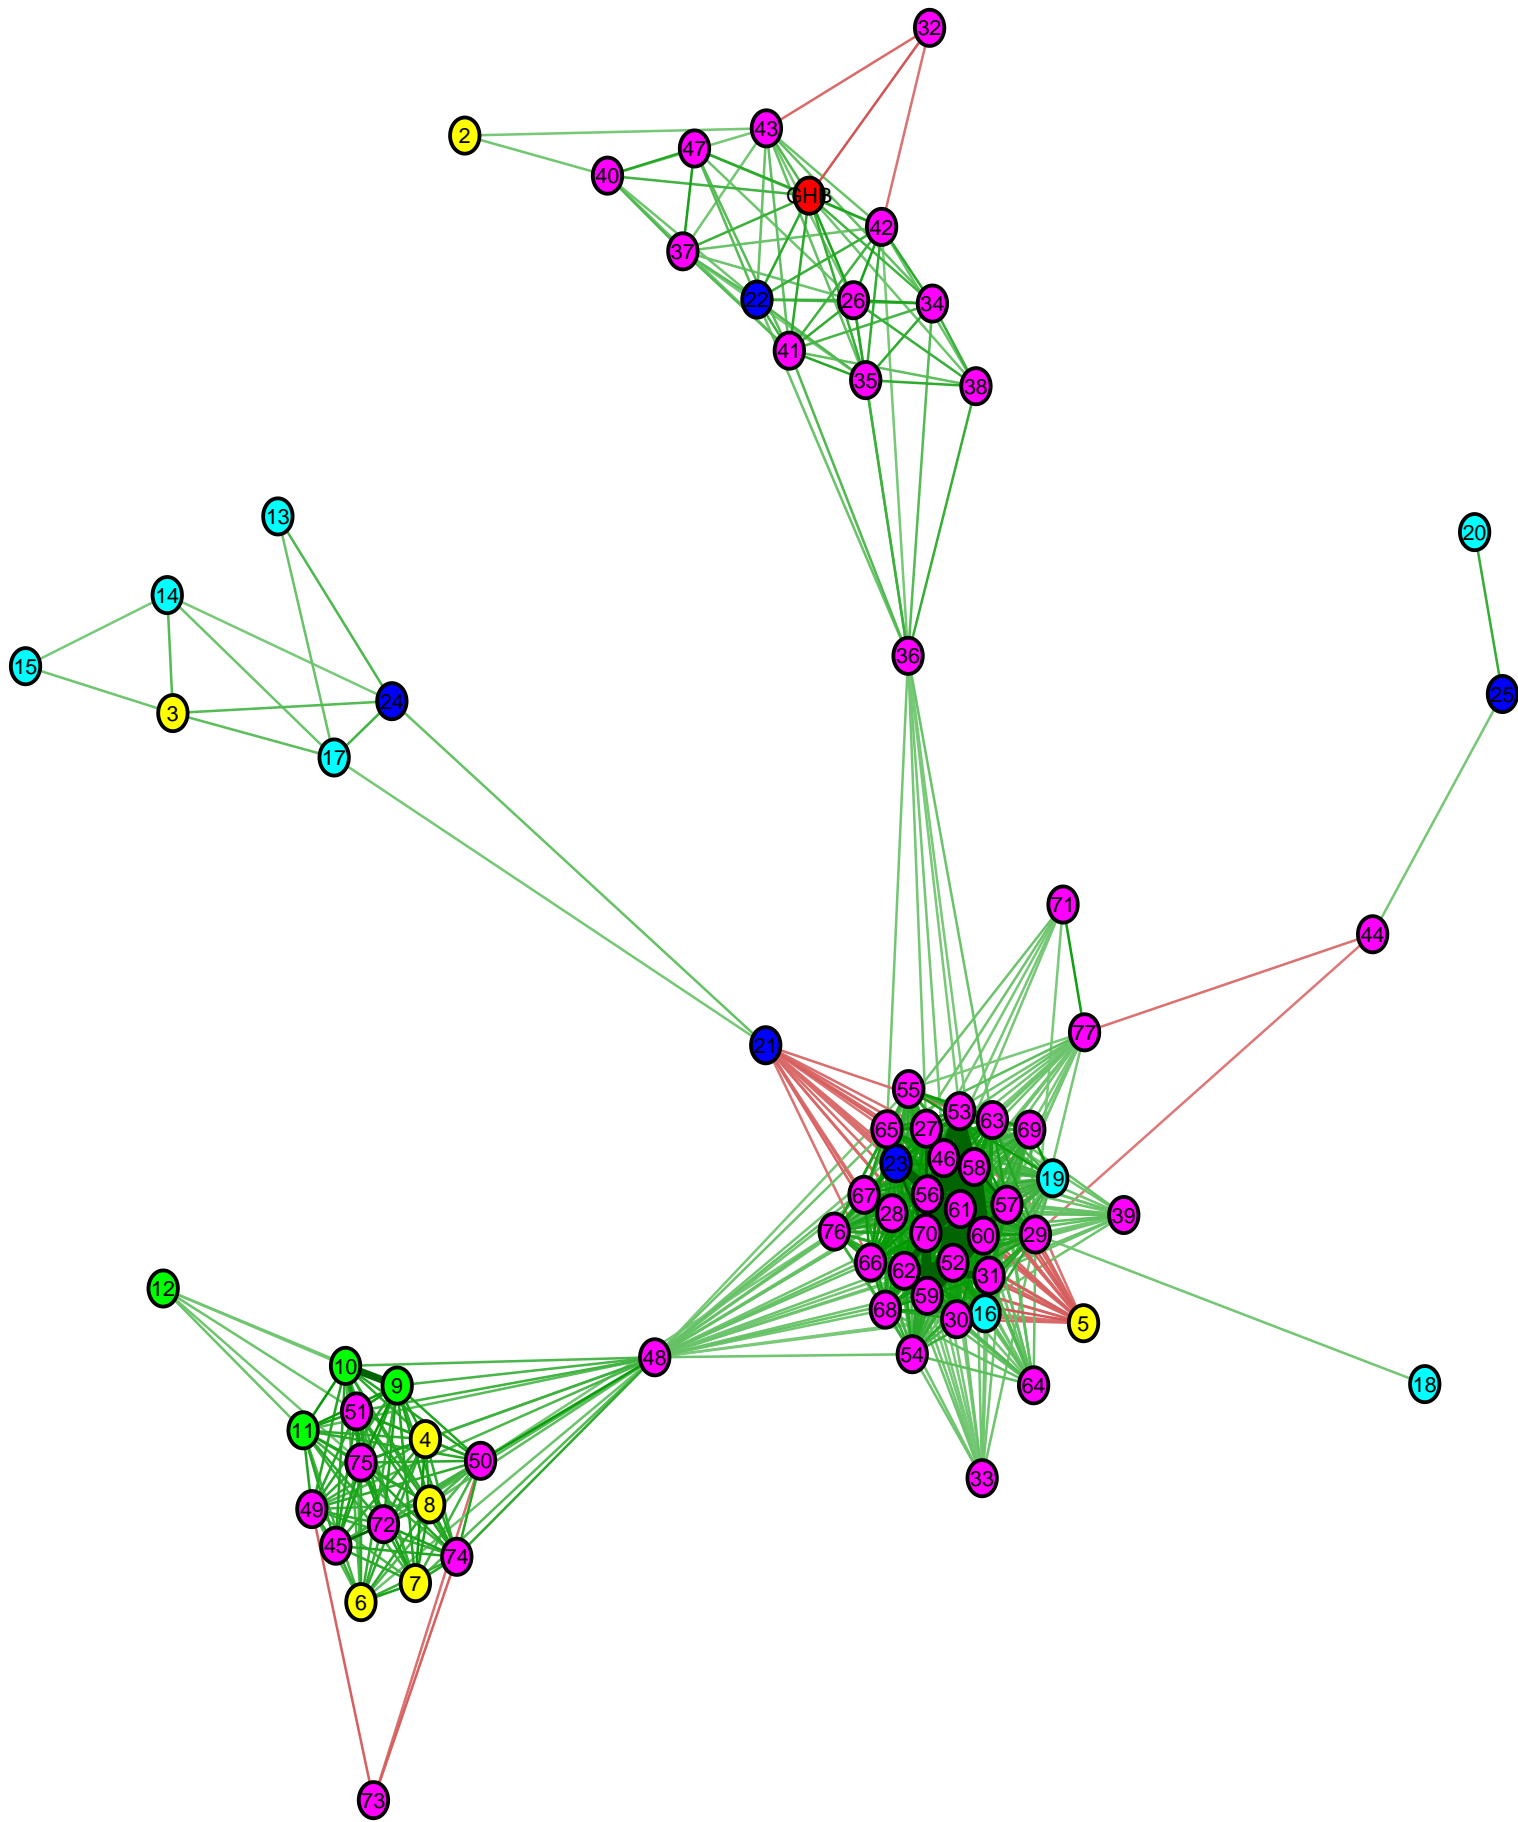

- GHB**
- GHB: GHB
- Carnitines**
- 2: GHB\_carnitine
  - 3: Acetyl carnitine
  - 4: Arachidyl carnitine
  - 5: Succinylcarnitine
  - 6: Oleoyl–Carnitine
  - 7: C17:0 acylcarnitine
  - 8: Myristoyl carnitine
- Lipids**
- 9: LysoPC O–16:0/0:0
  - 10: LysoPC P–18:0/0:0
  - 11: LysoPC 17:0
  - 12: L–A–LysoPC (18:1)
- Amino\_acids**
- 13: Proline
  - 14: Threonine
  - 15: Glutamine
  - 16: Lysine
  - 17: Glutamic acid
  - 18: Cyclo (Pro–Thr)
  - 19: Val–Ieu
  - 20: 5–adenosyl–homocysteine
- Others**
- 21: Betaine
  - 22: GABA–2–Hydroxyglutarate
  - 23: Indole–3–carboxaldehyde
  - 24: Thioproline
  - 25: Methylthiadenosine (MTA)
- Unknowns**
- 26: M354T52
  - 27: M119T44
  - 28: M130T173\_r
  - 29: M130T246
  - 30: M132T128
  - 31: M147T391
  - 32: M165T51
  - 33: M169T102\_r
  - 34: M250T52
  - 35: M253T52
  - 36: M256T52
  - 37: M259T82\_r
  - 38: M262T52
  - 39: M265T172
  - 40: M297T48
  - 41: M325T52
  - 42: M342T52
  - 43: M345T50\_r
  - 44: M367T466\_r
  - 45: M468T432
  - 46: M484T74
  - 47: M507T82
  - 48: M534T471
  - 49: M538T535
  - 50: M560T479
  - 51: M572T482
  - 52: M80T42
  - 53: M91T60
  - 54: M93T95
  - 55: M203T428
  - 56: M77T95
  - 57: M96T43
  - 58: M79T95
  - 59: M119T128
  - 60: M142T128
  - 61: M91T95
  - 62: M106T392
  - 63: M355T74
  - 64: M201T400
  - 65: M84T53
  - 66: M84T81
  - 67: M95T60
  - 68: M185T348
  - 69: M234T428
  - 70: M130T128
  - 71: M840T313
  - 72: M470T432
  - 73: M275T513
  - 74: M516T442
  - 75: M499T471
  - 76: M94T92
  - 77: M840T312\_2
