# Supplementary material for: A Retrospective Metabolomics Analysis of Gamma-Hydroxybutyrate in Humans: New Potential Markers and Changes in Metabolism Related to GHB Consumption
Source: Front Pharmacol. 2022 Mar 3;13:816376. doi: 10.3389/fphar.2022.816376 (PMC8927817; doi:10.3389/fphar.2022.816376)
Supplement: Supplementary file 3 [file DataSheet2.xlsx]

## Sheet: Table S4_result summary
nm	annotation	other note	isotopes	adduct	name	rt (min)	direction	FC(P/N)	mzmed	M1.VIP[1+4+0]_OPLSDA	p.value	qvalue	lasso	%IncMSE_noscaling	MeanDecreaseAccuracy_RFclass	pearson correlation_absolute	VIP after randomization
428					M165T51	0.844155	↓	0.18593	165.087	4.47772	5.70888e-13	2.31784e-10	-0.132576	1.3878	4.97458	0.632354	0.0576955
2598					M507T82	1.36059	↑	3.99406	507.155	3.86501	1.62578e-13	8.25096e-11	0.333133	4.47451	6.30269	0.796249	0.63032
1726					M354T52	0.867415	↑	6.02822	354.061	3.81438	6.7716e-14	6.05793e-11	0.935043	6.18393	7.1077	0.84879	0.695784
1660					M342T52	0.872619	↑	3.641	342.061	3.54178	2.682e-18	5.44456e-15	0.173391	5.81213	7.29418	0.83012	0.60292
1383					M297T48	0.806756	↑	3.12132	297.081	3.53777	6.75681e-11	1.52406e-08	0.702748	2.76226	5.10089	0.709457	0.807262
1059					M250T52	0.873419	↑	3.79073	250.013	3.11307	2.27767e-09	4.20341e-07	0	4.33066	5.00557	0.702932	0.522654
1112	Unknown	reproted			M259T82	1.37003	↑	2.81565	259.079	3.09909	7.6897e-12	2.21433e-09	0	3.90941	6.84787	0.730197	0.425277
1556					M325T52	0.860486	↑	2.69235	325.107	2.9933	4.52905e-12	1.4975e-09	0.0189125	5.79975	5.12345	0.795139	0.767198
927	GABA-2-hydroxyglutarate				M234T52	0.867453	↑	2.27373	234.097	2.92042	1.06706e-13	7.22056e-11	0.186554	4.30793	5.57163	0.790582	0.369573
804					M218T81	1.34357	↓	0.457652	218.059	2.75775	8.05592e-05	0.0035132	0	-0.769714	0.735135	0.365248	0.048203
45					M93T95	1.57885	↓	0.43036	93.0695	2.7314	0.000319636	0.00741305	0	1.33549	0.955637	0.325466	0.408859
1079					M253T52	0.865276	↑	2.4115	253.021	2.71097	8.01131e-10	1.62632e-07	0.130337	4.4058	3.76661	0.748498	0.811181
2123	C17:0 acylcarnitine		[311][M]+		M428T460	7.65859	↓	0.426807	428.374	2.68722	9.72368e-06	0.0010113	0	-0.134653	0	0.382943	0.477274
17					M80T42	0.706692	↓	0.140859	80.0494	2.62769	0.000604164	0.010478	0	0	1.001	0.257517	0.294646
50					M96T43	0.710823	↓	0.258317	96.0443	2.54809	2.39288e-05	0.00186878	0	-1.02171	0	0.319951	0.227967
16				[M+NH4]+ 61.0205	M79T95	1.57873	↓	0.21548	79.0541	2.50344	9.11713e-05	0.00369894	0	-1.001	1.001	0.290277	0.554594
2844					M538T535	8.92202	↓	0.476511	538.387	2.47366	0.000201446	0.00554462	0	1.02278	0.617954	0.338437	0.0729499
140			[17][M+1]+		M119T128	2.13368	↓	0.289908	119.068	2.44256	7.36485e-05	0.00337652	0	-1.07609	1.41498	0.294116	0.161406
1675					M345T50	0.836388	↑	1.91132	345.068	2.35625	1.09902e-11	2.78882e-09	0.0203186	3.36536	4.43266	0.650235	0.224785
313		isotope of M146T128	[42][M+1]+		M147T128	2.13566	↓	0.329104	147.063	2.35415	2.9159e-05	0.00209186	0	-0.964821	0	0.323215	0.0548484
280		isotope of M142T128			M143T128	2.13733	↓	0.299101	143.073	2.32826	4.57495e-05	0.00267602	0	0.979432	1.40072	0.318544	0.133032
579					M188T85	1.41342		0.948325	188.091	2.28878	0.00970359	0.0408496	0	1.0018	1.001	0.272229	0.388689
275				[M+H]+ 141.058	M142T128	2.13542	↓	0.297053	142.065	2.2785	5.15782e-05	0.00283574	0	-1.10235	1.39305	0.307125	0.0699228
36					M91T95	1.57892	↓	0.267048	91.0541	2.27554	0.000270363	0.0067106	0	-1.40118	0.0183649	0.285637	0.27872
1218			[160][M]+		M271T560	9.32821	↑	1.75885	271.274	2.27215	9.14678e-06	0.000974533	0	-1.8701	0	0.381336	0.525941
15				[M+H]+ 76.0309	M77T95	1.57858	↓	0.326416	77.0384	2.26964	0.000118458	0.0041952	0	-1.001	1.001	0.299185	0.62105
2132		Isotope C17:0 acylcarnitine	[311][M+1]+		M429T460	7.66029	↓	0.483575	429.377	2.26051	0.00058124	0.0102603	0	1.00097	1.32699	0.298479	0.179907
83			[12][M+1]+		M106T392	6.52648	↓	0.305077	106.073	2.23854	0.000262397	0.00658767	0	1.03968	0	0.265286	0.0482299
2421	LysoPC O-16:0/0:0	LysoPC O-16:0/0:0	[373][M]+		M482T481	8.01549	↓	0.562767	482.361	2.23648	0.000571101	0.0101673	0	-0.99912	-1.001	0.317091	0.642676
2606	LysoPC P-18:0/0:0	LysoPC P-18:0/0:0	[414][M]+		M508T489	8.1463	↓	0.571484	508.376	2.23331	0.000817399	0.0121883	0	0.36835	-1.72634	0.302857	0.222541
37					M91T60	0.997923	↓	0.248844	91.0542	2.2303	0.000534932	0.009822	0	-1.001	1.41661	0.252845	0.531454
1161					M265T172	2.85905	↓	0.458203	265.05	2.22934	0.0113063	0.0441061	0	1.11069	0	0.261813	0.4897
137					M119T44	0.733039	↓	0.295633	119.035	2.22765	0.000168405	0.0048983	0	-0.999965	1.001	0.277643	0.133496
669			[94][M]+		M200T23	0.378107	↑	1.9633	200.128	2.22756	0.00506989	0.0293194	0	-0.882608	1.001	0.298455	0.601204
1732					M355T74	1.23554	↓	0.261357	355.074	2.22346	0.00701853	0.0348578	0	0.569853	0	0.217324	0.625826
676					M201T400	6.67435	↓	0.537982	201.128	2.2234	0.000110266	0.0040496	0	0.959411	-0.577106	0.321767	1.25721
20					M84T53	0.876152	↓	0.391203	84.0444	2.22316	0.000200983	0.00553593	0	-0.907149	0	0.275642	0.336257
2413			[369][M+1]+		M481T481	8.01812	↓	0.578176	481.348	2.21571	9.71485e-05	0.00379259	0	1.44411	0.7963	0.36565	0.79096
2433				[M+H]+ 483.109	M484T74	1.23405	↓	0.330494	484.116	2.21223	0.00014271	0.00457115	0	0.760723	-1.001	0.267918	0.413035
196					M130T246	4.10742	↓	0.487024	130.065	2.20336	4.01157e-07	6.78636e-05	0	1.001	1.88827	0.357976	0.324207
3108			[536][M]+		M572T482	8.02823	↓	0.591826	572.371	2.19798	0.000456073	0.00898861	0	1.001	1.001	0.312589	0.331221
621			[87][M]+	[M+H]+ 192.027	M193T31	0.519239		0.925179	193.035	2.19461	0.0723294	0.125552	0	-0.992831	0	0.14885	0.385995
2613		Isotope of LysoPC P-18:0/0:0	[414][M+1]+		M509T489	8.1463	↓	0.591202	509.379	2.18741	0.00132338	0.015211	0	-1.001	0.474483	0.296711	0.330255
2331			[351][M]+		M468T432	7.19371	↓	0.536142	468.309	2.18582	0.000120878	0.00423625	0	1.69413	1.34858	0.350733	0.843163
2596		lose 2H LysoPC P-18:0/0:0			M506T489	8.14817	↓	0.602345	506.36	2.18122	0.000342936	0.00771406	0	1.2606	1.001	0.320744	0.415718
21					M84T81	1.34286	↓	0.396973	84.0807	2.17884	5.17792e-05	0.00284091	0	0	0	0.295929	0.181964
2273	Arachidylcarnitine				M456T478	7.96762	↓	0.485992	456.404	2.17878	0.000169233	0.00490784	0	1.00083	0.312829	0.359843	0.567662
193	Unknown	reported			M130T173	2.88946	↓	0.375242	130.05	2.1545	1.57883e-05	0.00143031	0	-0.557926	0	0.340272	0.784189
1999			[288][M]+		M407T31	0.515934		1.0758	407.044	2.15427	0.0566941	0.10947	0	1.001	0	0.164411	0.026323
49					M95T60	0.997071	↓	0.291008	95.0491	2.14057	0.000234524	0.00613438	0	-0.993595	-0.331407	0.281083	0.713909
559				[M+H]+ 184.146	M185T348	5.79963	↓	0.190934	185.154	2.13454	0.00293479	0.0217943	0	-1.001	1.001	0.214058	0.16307
930				[M+NH4]+ 216.151	M234T428	7.13742	↓	0.36924	234.185	2.11559	0.000971049	0.0131507	0	-1.001	-1.001	0.322491	0.462993
195					M130T128	2.14071	↓	0.447468	130.065	2.11172	7.87652e-06	0.000886881	0	-1.001	0	0.34116	0.0933142
94					M110T44	0.7338	↓	0.308849	110.035	2.10992	0.000969588	0.0131424	0	0	0	0.252983	0.342743
128			[17][M]+		M118T128	2.137	↓	0.374244	118.065	2.10763	0.000217643	0.00584091	0	1.001	1.83658	0.277962	0.438011
1040	GHB‐carnitine	reported			M248T57	0.946443	↑	2.55185	248.149	2.10761	9.25978e-06	0.000981876	0	2.08546	2.37358	0.432833	0.414352
463				[M+H+MeCN]+ 128.026 [M+H-H2O]+ 187.064	M170T128	2.137	↓	0.370301	170.06	2.10442	5.10681e-05	0.00282253	0	-0.925719	1.001	0.306452	0.0432637
2791					M530T489	8.14744	↓	0.607741	530.358	2.10149	0.000638791	0.0107927	0	1.27582	-1.001	0.313563	0.310362
2626	LysoPC 17:0		[419][M]+		M510T491	8.17969	↓	0.573426	510.356	2.09936	0.00271823	0.0211035	0	0	1.001	0.272229	0.039641
939					M237T28	0.463553	↓	0.450925	236.998	2.09856	9.19371e-05	0.00371135	0	-0.764783	0	0.319745	0.645335
2429			[373][M+1]+		M483T481	8.01707	↓	0.597626	483.364	2.0927	0.0011801	0.0143832	0	1.001	-1.001	0.305031	0.718221
2633			[419][M+1]+		M511T491	8.17924	↓	0.634995	511.359	2.09028	0.00230656	0.0196009	0	-1.001	1.001	0.279071	0.561887
114				[M+H+HCOOH]+ 67.9896	M115T32	0.540799	↓	0.480009	115.003	2.07881	0.0323028	0.0799646	0	0	0	0.171594	0.294977
1342			[175][M+1]+		M291T207	3.44413	↑	1.24344	291.143	2.07849	0.0520023	0.104196	0	0.737997	0	0.204763	0.0558504
1233			[163][M]+		M276T211	3.5102	↑	1.77566	276.123	2.07665	0.0436623	0.0939363	0	-1.01575	0	0.207825	0.156487
2671				[M+Na]+ 493.317	M516T442	7.36711	↓	0.575853	516.306	2.07211	5.08833e-05	0.00281771	0	-1.18707	-1.41693	0.360752	0.270361
1429			[187][M]+		M306T163	2.72098	↑	1.53861	306.134	2.06905	0.0321963	0.0798162	0	1.42673	0.738075	0.213126	0.274499
1767					M361T497	8.27644	↓	0.538785	361.271	2.06706	0.000429131	0.00868597	0	1.24146	0	0.286693	0.455828
689				[M+H]+ 202.099	M203T428	7.13695	↓	0.478143	203.107	2.05809	4.67105e-05	0.00270374	0	0.856925	0.846094	0.374012	0.290583
2338			[351][M+1]+		M469T431	7.19153	↓	0.567159	469.312	2.05574	0.00041951	0.00858725	0	1.05537	0	0.332679	1.06568
186				[M+H-H2O]+ 146.058	M129T391	6.52466	↓	0.364406	129.055	2.05249	0.000384419	0.00820745	0	0	1.38581	0.268367	0.0364664
216			[29][M]+	[M+NH4]+ 114.046	M132T128	2.14067	↓	0.454877	132.081	2.05106	8.5622e-06	0.000935396	0	-1.32858	1.41578	0.375874	0.223838
3032			[515][M]+	[M+K]+ 521.348	M560T479	7.99162	↓	0.666546	560.311	2.05082	8.77076e-05	0.00364123	0	0.771692	1.4888	0.351071	0.365124
226	Thioproline		[31][M]+	[M+H+HCOOH]+ 87.014	M134T23	0.375298	↑	1.25339	134.027	2.04261	0.000900941	0.0127344	0	-1.37776	1.001	0.331623	1.01546
563				[M+H]+ 185.105 [M+H-H2O]+ 203.116	M186T23	0.382179	↑	1.61232	186.112	2.04209	0.00299937	0.0219888	0	1.32451	1.001	0.299929	0.568071
1874			[260][M]+	[2M+H]+ 192.027	M385T33	0.544712		1.10103	385.062	2.04115	0.0927885	0.142985	0	1.001	0.0580695	0.140874	0.279601
88					M107T408	6.80324	↓	0.291922	107.049	2.03825	0.0011699	0.0143262	0	0.992313	1.41693	0.265925	0.816128
282					M143T133	2.22291	↓	0.442319	143.106	2.03811	0.00180053	0.0175385	0	1.37027	0	0.2526	0.112681
2577					M504T481	8.01626	↓	0.24567	504.342	2.03122	0.0028268	0.0214575	0	1.00126	1.001	0.256617	0.749906
2739			[448][M+2]+		M524T479	7.99052	↓	0.620079	524.361	2.02432	0.000286209	0.00694703	0	-1.39391	-0.59064	0.325912	1.12271
26				[M+H+H2O]+ 67.9896	M87T32	0.540851	↓	0.350893	87.0075	2.0201	0.00276249	0.0212498	0	-0.995296	1.34895	0.229157	0.573924
3121			[536][M+1]+		M573T482	8.02842	↓	0.654974	573.374	2.017	0.000435188	0.00874699	0	-0.989044	1.35454	0.315887	0.698054
2134					M430T461	7.67684	↓	0.527743	430.38	2.01286	0.00099651	0.0132933	0	1.28466	0	0.298353	0.108623
1332			[175][M]+	[M+H]+ 289.132	M290T207	3.44336		1.15082	290.14	2.00359	0.0709893	0.124255	0	-0.9431	1.35807	0.202795	0.0667013
1221		isotope of M271T560	[160][M+1]+		M272T560	9.32819	↑	1.60219	272.277	2.00032	6.27013e-06	0.000760667	0	-0.941549	0	0.394329	0.654057
286			[39][M]+		M144T128	2.13993	↓	0.457227	144.081	1.99819	5.11727e-05	0.00282525	0	0	0	0.304898	0.151542
2845					M538T512	8.53388	↓	0.66413	538.483	1.99177	0.00497238	0.0290063	0	-1.20726	0	0.240302	0.0815494
2531					M499T228_1	3.79792	↑	1.33741	498.943	1.98755	0.00192714	0.0180495	0	-0.836031	1.31705	0.262717	0.180577
257					M138T112	1.86126	↓	0.416233	138.091	1.98341	0.00196794	0.0182058	0	-0.646524	1.001	0.285608	1.18877
578					M188T153	2.5561	↓	0.534619	188.071	1.98336	0.00576067	0.0314502	0	0.99189	0	0.248746	1.08637
1042				[M+2H]2+ 495.28	M249T114_1	1.90733		1.18146	248.647	1.97783	0.0049264	0.028872	0	1.001	0	0.207361	0.345176
2913			[490][M]+		M548T489	8.14178	↓	0.605867	548.371	1.97729	0.00294005	0.0218103	0	-1.40063	0	0.259244	0.0723353
7					M70T80	1.33268	↓	0.458458	70.0286	1.97556	7.97191e-05	0.0034973	0	1.4299	1.001	0.28729	0.166689
2517					M497T471_1	7.84879	↓	0.607006	496.642	1.97257	0.000899327	0.0127244	0	-0.289309	1.001	0.300423	0.465671
2900			[484][M+1]+		M547T468	7.79388	↓	0.624027	547.359	1.96949	0.00198803	0.0182814	0	1.31685	1.001	0.284544	0.610796
1828	Myristorylcarnitine				M372T413	6.88333	↓	0.703612	372.311	1.96618	0.000415394	0.00854433	0	-0.902476	0	0.306068	0.710405
2346			[351][M+2]+		M470T432	7.19344	↓	0.609851	470.314	1.96604	9.00494e-05	0.00368054	0	1.37287	1.001	0.371096	0.787179
2802					M532T491	8.18162	↓	0.588958	532.337	1.96533	0.000471766	0.00916406	0	-1.10178	-1.33494	0.314419	0.287837
2428			[371][M+1]+		M483T451	7.51478	↓	0.616325	483.327	1.96492	0.000942056	0.0129828	0	-0.401704	0	0.328654	0.32288
2419			[371][M]+		M482T451	7.5154	↓	0.627898	482.324	1.95138	0.00109173	0.0138703	0	1.04796	1.001	0.308807	0.419019
2627			[420][M]+		M510T524	8.73249	↓	0.644901	510.392	1.94919	0.0082623	0.0378805	0	1.17373	1.001	0.236553	0.246037
1131					M262T52	0.867448	↑	2.15876	262.013	1.94573	0.000154009	0.00472283	0	4.27522	2.31833	0.543837	0.208321
401			[56][M+1]+		M162T428	7.13799	↓	0.430083	162.099	1.94466	0.00127365	0.0149304	0	1.00093	1.32852	0.311561	0.277008
240					M136T75	1.24671	↓	0.325119	136.062	1.9416	0.00443581	0.0273571	0	1.001	0	0.218231	0.398536
125					M117T128	2.13689	↓	0.449728	117.057	1.93984	8.32293e-05	0.00356251	0	1.001	-1.001	0.294704	0.370409
2242					M450T436	7.26384	↓	0.618575	450.358	1.93925	0.00322107	0.0228599	0	0.994342	0.121764	0.276638	0.0446125
4788					M920T74_1	1.23394	↑	1.38093	919.738	1.93869	0.00321406	0.0228324	0	1.00029	0	0.293076	0.307295
677			[95][M]+		M201T379	6.30985	↓	0.621267	201.128	1.93859	0.00241629	0.0200285	0	1.43375	-1.34954	0.276983	1.76934
261			[36][M]+		M139T32	0.529289	↓	0.632522	139.003	1.93558	0.300172	0.268167	0	1.001	0	0.0822382	0.355755
47					M94T92	1.52877	↓	0.628604	94.0649	1.9354	1.03203e-05	0.00104753	0	-0.939623	0	0.349278	0.339691
2734			[448][M+1]+		M523T479	7.98868	↓	0.650835	523.359	1.93366	0.000232684	0.00610313	0	1.35328	1.001	0.329246	1.20585
906					M231T70	1.17226	↓	0.343995	231.084	1.9309	0.00112259	0.0140543	0	1.001	-1.001	0.273568	0.848949
1350			[177][M]+		M293T48	0.799144		0.961142	293.098	1.93028	0.108816	0.155742	0	1.001	0	0.115159	0.00209912
2265					M454T462	7.69471	↓	0.485371	454.389	1.92941	0.00389425	0.0254894	0	-0.767945	0	0.286607	0.521422
494			[69][M]+	[M+H-H2O]+ 192.027	M175T32	0.526501		1.07781	175.024	1.92613	0.166948	0.197224	0	-0.883631	0	0.11956	0.256664
2408			[369][M]+		M480T481	8.01809	↓	0.61804	480.344	1.92546	0.00287419	0.0216071	0	-1.32163	0	0.265891	1.02985
2912			[484][M+2]+		M548T468	7.7949	↓	0.627654	548.362	1.92497	0.00153076	0.0163007	0	0.999932	-1.36557	0.298059	0.867825
499					M176T74	1.23065	↓	0.739373	176.038	1.91903	0.0514895	0.103596	0	-0.999634	0	0.177307	0.251897
346					M152T33	0.553595	↓	0.546568	152.032	1.91511	0.034577	0.0830337	0	0	-1.001	0.178095	0.450909
2747			[448][M+3]+		M525T480	7.99206	↓	0.661737	525.364	1.91331	0.000160022	0.00479839	0	1.38523	1.001	0.336074	1.04746
287					M144T130	2.16155	↓	0.356843	144.101	1.90983	0.0107094	0.0426494	0	-1.001	0	0.209835	0.529255
2607					M508T523	8.70994	↓	0.674123	508.376	1.90946	0.00321637	0.0228415	0	0	0	0.262581	0.664765
381					M160T26	0.427001	↓	0.528167	160.06	1.90647	0.000485249	0.00931082	0	0.374152	0	0.280215	0.952751
800					M217T73	1.21087	↑	1.53025	217.154	1.90235	0.00093803	0.0129591	0	1.04288	-1.40912	0.330426	0.41523
79			[12][M]+		M105T392	6.52512	↓	0.502786	105.07	1.90033	0.000372351	0.00806918	0	1.08111	1.31339	0.264039	0.352406
119				[M+H]+ 114.046	M115T128	2.13494	↓	0.377069	115.054	1.89615	0.000803513	0.0120917	0	0	1.001	0.246538	0.14276
2813			[468][M]+	[M+K]+ 495.333	M534T471	7.84728	↓	0.678794	534.295	1.89568	2.23626e-05	0.00179407	0	1.00099	0	0.374595	0.0494578
301	Indole-3-carboxaldehyde		[42][M]+	[M+NH4]+ 128.026	M146T128	2.14008	↓	0.547666	146.06	1.89301	3.07548e-05	0.00215287	0	-1.001	-0.367708	0.31245	0.128224
4				[M+H]+ 67.9896	M69T33	0.542311	↓	0.221616	68.9969	1.88626	0.12362	0.166611	0	0.997464	1.001	0.122894	0.264306
6					M69T65	1.07946	↓	0.580252	69.0698	1.88618	0.00090289	0.0127465	0	-1.001	0	0.261375	1.23649
315				[M+H]+ 146.058	M147T391	6.52457	↓	0.480971	147.065	1.87107	9.19215e-05	0.0037111	0	0.741688	0	0.273214	0.576009
294			[39][M+1]+		M145T128	2.13733	↓	0.481147	145.084	1.86793	0.000410649	0.00849433	0	-1.001	1.001	0.277872	0.141323
48				[M+H+H2O]+ 76.0309	M95T95	1.57858	↓	0.383338	95.049	1.8636	0.00293707	0.0218013	0	1.001	1.91014	0.229945	0.301337
300					M146T92	1.52656	↓	0.433043	146.06	1.86112	0.000911625	0.0128002	0	1.36208	0	0.257119	0.321579
2756			[453][M+2]+		M526T511	8.51833	↓	0.640715	526.377	1.86092	0.000970236	0.013146	0	1.00101	0	0.289044	0.882505
185			[24][M]+		M129T32	0.530216	↓	0.640217	129.019	1.85347	0.388766	0.308172	0	-0.956428	1.001	0.0694453	0.283495
2938			[490][M+1]+		M549T488	8.14119	↓	0.627911	549.374	1.8495	0.0028351	0.0214839	0	-1.00101	0	0.259813	0.146113
394			[56][M]+		M161T428	7.13636	↓	0.468159	161.096	1.8477	0.00531577	0.0301062	0	-1.001	1.308	0.285104	0.169163
2945			[496][M]+		M550T517	8.61669	↓	0.644524	550.387	1.84698	0.00815814	0.0376453	0	0.134179	0	0.22308	0.149112
752			[106][M]+	[M+NH4]+ 192.027	M210T29	0.491125		1.13557	210.061	1.84679	0.101972	0.150331	0	-1.2033	1.001	0.141417	0.101916
153					M121T392	6.52581	↓	0.460062	121.065	1.84533	0.000868943	0.0125321	0	-0.999744	1.25611	0.234984	0.112682
189					M129T196	3.27127	↓	0.624207	129.127	1.84076	2.75027e-05	0.00202525	0	-0.488098	0.713696	0.319252	0.16876
310			[44][M]+		M147T32	0.530518	↓	0.751282	147.029	1.83739	0.312688	0.274163	0	-1.001	1.001	0.0830313	0.0895562
2877			[480][M]+	[M+Na]+ 521.348	M544T480	7.99343	↓	0.613928	544.337	1.8341	0.00170805	0.0171387	0	-0.656942	1.38232	0.276478	0.271241
2122			[308][M+2]+		M428T443	7.38504	↓	0.558488	428.364	1.83281	0.00297558	0.0219178	0	1.35856	0	0.267219	0.264668
2634			[420][M+1]+		M511T524	8.73415	↓	0.669301	511.395	1.82226	0.00663964	0.0338396	0	1.001	0	0.242378	0.034069
2826					M536T498	8.29635	↓	0.641462	536.371	1.82074	0.00301932	0.0220479	0	0.859249	0	0.252571	0.365257
1504			[198][M]+	[M+Na]+ 292.091	M315T25	0.412768	↓	0.410523	315.08	1.81997	0.722849	0.437983	0	1.001	0	0.00150276	0.606155
1963					M401T373	6.21181	↑	1.51084	400.547	1.81585	0.00941051	0.0402859	0	-0.927795	0	0.230779	0.119774
2436			[373][M+2]+		M484T481	8.0187	↓	0.640709	484.366	1.81426	0.000888864	0.012659	0	0	1.23164	0.322031	0.310114
1351			[178][M]+		M293T24	0.395498		0.94256	293.1	1.80347	0.381079	0.305031	0	-1.05552	1.001	0.0714051	1.0802
1077					M253T28	0.466775	↓	0.474996	252.972	1.80149	0.0019917	0.0182952	0	0.987194	1.001	0.255119	0.262962
1348			[175][M+2]+		M292T207	3.44375	↑	1.39828	292.145	1.79841	0.0396492	0.0892587	0	-1.46234	0	0.22878	0.402196
70			[8][M+1]+		M104T95	1.57877	↓	0.463928	104.057	1.79242	0.00109243	0.0138745	0	1.001	-1.001	0.24691	0.271262
1970			[283][M]2+		M402T373	6.21487	↑	1.46251	402.051	1.78867	0.0107329	0.0426892	0	0.919547	0.369996	0.263372	0.369017
3097			[534][M]+		M570T461	7.68356	↓	0.58798	570.355	1.7864	0.00214333	0.0189234	0	-1.05731	1.001	0.27097	0.174125
1289					M282T410	6.83313		0.821432	282.279	1.78494	0.00728161	0.0355384	0	-0.810859	1.001	0.254587	0.387622
2893			[484][M]+		M546T468	7.79404	↓	0.606748	546.356	1.78279	0.0064338	0.033309	0	-0.646411	0	0.253287	0.181085
803				[M+H]+ 216.151	M217T428	7.13727	↓	0.50331	217.159	1.78256	0.00391942	0.0255812	0	-0.140158	0	0.296165	0.477981
749					M209T400	6.67435	↓	0.492136	209.117	1.78194	0.00168431	0.0170321	0	1.34151	1.001	0.250189	0.624921
2537			[396][M+3]+		M499T471	7.84515	↓	0.671734	499.347	1.77647	0.0001171	0.00417179	0	0.892322	1.001	0.354754	0.705131
2640			[419][M+2]+		M512T491	8.18071	↓	0.680165	512.361	1.77645	0.00254517	0.0205047	0	0.108969	-0.111304	0.277417	0.372563
1313			[171][M]+		M287T173	2.88914	↓	0.529731	287.1	1.77411	0.000491527	0.00937793	0	1.001	0	0.331282	1.37034
2702			[438][M+2]+		M520T471	7.85512	↓	0.599717	520.327	1.77402	0.000351837	0.00782434	0	-1.00104	0	0.317992	0.221501
2892			[483][M]+	[M+Na]+ 523.364	M546T511	8.51975	↓	0.659885	546.353	1.77288	0.00169852	0.0170961	0	0.56243	0	0.279092	0.331002
1438					M307T86	1.42647	↓	0.74872	307.122	1.77163	0.00976259	0.0409609	0	0.57837	-0.76278	0.208523	0.32633
1230					M275T513	8.5446	↑	1.41387	275.258	1.77046	0.000356691	0.00788342	0	-0.917705	-1.001	0.372063	0.23294
383				[M+H+H2O]+ 141.058	M160T128_1	2.13798	↓	0.520799	160.076	1.7684	7.18671e-05	0.00333899	0	1.001	-1.001	0.31113	0.245713
217					M132T68	1.13949	↑	1.26172	132.103	1.76466	0.00395183	0.0256987	0	0.984953	0	0.278584	0.343611
2724					M523T308_1	5.12513	↑	1.27019	522.544	1.76374	0.00126547	0.0148831	0	-0.999723	0	0.250518	0.820522
1358			[178][M+1]+		M294T26	0.425297	↑	1.20038	294.101	1.76217	0.0692051	0.122495	0	1.001	0	0.138862	0.506077
96			[13][M]+		M111T32	0.53382	↓	0.4322	111.008	1.75995	0.919099	0.497711	0	0.912931	1.001	0.00792846	0.524024
1763			[239][M]+		M361T32	0.537809		1.1985	361.062	1.75917	0.0713159	0.124573	0	0.869445	0	0.173019	0.0663076
3204				[M+Na]+ 567.332	M590T451	7.52475	↓	0.62392	590.322	1.75466	0.0011567	0.0142515	0	1.00444	0	0.295228	0.00271992
3106			[535][M]6+		M572T313_1	5.22238	↑	1.22816	572.145	1.75416	0.00205154	0.0185202	0	-1.19633	0	0.226984	0.425348
2639			[425][M]+		M512T440	7.32829	↓	0.607089	512.334	1.7534	0.00191337	0.0179958	0	0.96241	-1.001	0.260148	0.249909
76					M105T95_1	1.57898	↓	0.439681	105.045	1.75195	0.00340319	0.0235862	0	1.001	0	0.2435	0.307814
1980			[283][M+3]2+		M404T373_1	6.21136	↑	1.49238	403.55	1.75074	0.00635236	0.0330944	0	0.508674	0.0650924	0.289237	0.253266
1474					M310T26	0.432515	↑	1.60919	310.167	1.75041	2.67302e-05	0.00199296	0	-0.291208	1.001	0.357248	0.186885
1339					M291T79	1.31315	↓	0.463982	291.07	1.74491	4.92181e-05	0.00277344	0	1.12881	1.41692	0.295977	0.174049
2869			[478][M]+		M542T434	7.23754	↓	0.668069	542.324	1.74083	0.00295543	0.021857	0	-1.16961	1.001	0.322264	0.387821
2109	Oleoylcarnitine		[308][M]+		M426T443	7.3787	↓	0.620947	426.358	1.73674	0.00198308	0.0182629	0	-0.43097	1.001	0.258712	0.411225
1549			[206][M+1]2+		M324T90	1.49419	↑	1.6143	323.57	1.73614	0.000422673	0.00861995	0	-0.126913	-1.7316	0.316889	0.337772
2009			[288][M+1]+		M408T32	0.536185	↑	1.44722	408.047	1.73549	0.0586359	0.111543	0	-0.592294	0	0.142789	0.567709
1542			[206][M]2+		M323T90	1.493	↑	1.65235	323.068	1.73121	0.00248611	0.0202898	0	1.00194	0	0.328269	0.150437
2854					M540T538	8.96617	↓	0.598587	540.499	1.72447	0.01359	0.0493282	0	1.00236	1.001	0.198683	0.184471
682			[95][M+1]+		M202T379	6.3137	↓	0.672643	202.131	1.72209	0.00137816	0.0155076	0	-1.10686	1.79746	0.336368	2.06241
8					M70T22	0.371091	↓	0.465064	70.065	1.72184	0.0867566	0.138266	0	0	1.15592	0.152613	0.222506
1006			[134][M]2+	[M+2H]2+ 487.311	M245T154_1	2.56898		1.07305	244.663	1.72045	0.212172	0.222203	0	1.09869	0	0.123964	0.144769
932					M235T25	0.42051	↑	1.36121	235.092	1.71911	0.0553533	0.108003	0	1.001	1.001	0.16246	0.0155615
1885			[260][M+1]+		M386T33	0.545087	↑	1.38029	386.064	1.71895	0.040028	0.0896926	0	0	0	0.173108	0.429714
1469			[194][M]+		M310T32	0.529834		1.00114	310.113	1.71822	0.152999	0.188176	0	-1.001	0	0.126723	0.478008
2605					M508T461	7.67624	↓	0.645377	508.339	1.71721	0.00466143	0.028073	0	-1.24485	0	0.256231	0.231884
518			[73][M+1]2+		M180T22	0.371401	↑	1.52634	179.629	1.71647	0.000971772	0.0131548	0	0.326197	-0.643269	0.337541	0.0295311
1973			[283][M+1]2+		M403T373_1	6.21135	↑	1.49712	402.552	1.71646	0.0122578	0.0463737	0	0.980551	0	0.260062	0.32351
3761					M675T274_3	4.55865	↑	1.40779	675.103	1.71467	0.000272889	0.00674901	0	0.313843	1.001	0.347756	0.615922
1877			[262][M]+	[M+Na]+ 362.165	M385T516	8.5961	↑	1.5483	385.154	1.71393	0.000318309	0.00739533	0	-1.31549	2.10039	0.358716	1.2212
1584					M330T308	5.12525	↑	1.36771	330.17	1.7134	0.0085491	0.0385128	0	-0.992849	0.771188	0.294818	1.31591
2641					M512T512	8.52907	↓	0.678555	512.467	1.71081	0.00901943	0.0395032	0	-1.00106	0	0.195454	0.667776
1069					M251T400	6.67368	↓	0.634486	251.128	1.70886	0.000149636	0.00466569	0	1.54196	0	0.344764	0.7943
2748			[453][M+1]+		M525T511	8.51955	↓	0.692516	525.375	1.70808	0.00172898	0.0172312	0	1.33205	0	0.284172	0.774278
2688			[438][M]+	[M+Na]+ 495.333	M518T471	7.85111	↓	0.67717	518.322	1.7048	0.000132065	0.00441537	0	1.00438	0	0.320455	0.138925
101					M112T16	0.269802	↓	0.545946	112.112	1.70468	0.179908	0.205013	0	0.90637	0	0.145249	0.404288
3115			[535][M+3]6+		M573T313_1	5.22142	↑	1.24146	572.646	1.70135	0.00666252	0.0338976	0	-1.35541	0	0.194953	1.08663
1653			[226][M+2]2+		M340T373_2	6.21755	↑	1.4636	340.053	1.70065	0.00301818	0.0220446	0	1.46261	0.996757	0.302773	0.0805437
1976			[283][M+2]2+		M403T373_2	6.21135	↑	1.48001	403.049	1.69994	0.00969199	0.0408277	0	1.41462	-1.001	0.279155	0.427933
138					M119T79	1.31455	↓	0.454538	119.035	1.698	0.00586549	0.0317528	0	-1.001	1.57788	0.207106	0.081997
1655			[226][M+3]2+		M341T373	6.21439	↑	1.41867	340.554	1.69268	0.00181693	0.017607	0	-1.00396	0.450352	0.309941	0.0162931
1086					M254T81	1.34505	↓	0.440378	254.038	1.69142	0.00643521	0.0333127	0	1.00101	0	0.224153	0.0712615
367			[50][M]+		M157T32	0.52885	↓	0.663239	157.013	1.6903	0.450565	0.334192	0	-1.001	0	0.0560513	0.26884
180					M126T120	2.00163	↓	0.63473	126.091	1.69018	0.000147121	0.00463195	0	-1.001	0	0.279592	0.36776
3055			[521][M]+	[M+K]+ 523.364	M562T511	8.52017	↓	0.660858	562.327	1.68956	0.00221962	0.0192465	0	-1.18924	1.001	0.295311	0.338236
3381			[592][M+1]+		M617T385	6.41969	↓	0.669925	617.18	1.68882	0.020535	0.0618934	0	1.00085	0	0.211764	0.553608
2955			[496][M+1]+		M551T517	8.61723	↓	0.719611	551.39	1.68812	0.0147872	0.0517857	0	1.00823	0	0.208901	0.0801217
675					M201T80	1.33249	↓	0.641041	201.123	1.68755	0.00141305	0.0156901	0	0.960652	1.28617	0.303941	1.00249
1419			[186][M]+		M304T258	4.30543	↑	1.2833	304.155	1.68623	0.141549	0.180174	0	-0.599546	0	0.147871	1.56925
4022			[714][M]2+		M718T192_1	3.19511	↑	1.57334	717.817	1.68498	0.0136291	0.0494113	0	0	-1.001	0.240643	0.0580658
548					M185T142	2.37488	↑	1.42644	184.618	1.6848	0.0616395	0.11463	0	0.998962	0	0.136112	0.843007
236					M135T130	2.16386	↑	1.74871	135.102	1.68272	0.0194732	0.0601241	0	-1.001	0.418493	0.16313	0.651785
1972			[281][M+2]+		M402T438	7.29449	↓	0.633072	402.348	1.68145	0.00412815	0.0263234	0	2.35386	1.001	0.259216	0.0598559
289			[37][M+1]+		M144T78	1.30246	↓	0.64299	144.121	1.68128	0.00113107	0.0141039	0	-0.999689	0	0.244061	1.2253
1652			[226][M+1]2+		M340T373_1	6.21487	↑	1.47943	339.556	1.68044	0.00179565	0.017518	0	-0.9584	1.96812	0.31195	0.211634
4916			[914][M]+	[2M+H]+ 495.333	M992T471	7.84852	↓	0.551708	991.675	1.68027	0.024621	0.0683291	0	0	0	0.196147	0.257134
1513	Decanoylcarnitine		[200][M]+		M316T356	5.93108	↑	1.89808	316.249	1.6796	0.0015903	0.0165933	0	-1.001	-0.21247	0.256422	0.296389
2142					M431T225_2	3.75221	↑	1.71025	431.425	1.67714	0.00889248	0.0392414	0	1.72243	0	0.253918	0.258779
4919			[914][M+1]+		M993T471	7.84667	↓	0.512324	992.679	1.67683	0.0232639	0.0662631	0	-1.29817	0	0.198484	0.367477
1414					M303T174	2.89389	↓	0.604448	303.074	1.67288	0.00014323	0.00457843	0	1.02799	1.001	0.338727	0.863464
2270					M455T463	7.70959	↓	0.609064	455.392	1.6722	0.0144826	0.051177	0	0.431392	0	0.240527	0.0490601
911	Val-leu				M231T428	7.13824	↓	0.562847	231.174	1.66788	0.00192002	0.0180218	0	-1.53664	0	0.31624	0.177372
560			[79][M+1]2+		M186T144	2.39623	↑	1.69066	185.62	1.66755	0.012533	0.0470044	0	1.001	-1.001	0.167462	1.33814
4160			[743][M+2]5+		M743T284_2	4.74049	↑	1.53496	742.759	1.66609	0.000957773	0.0130745	0	1.11943	1.26694	0.353455	0.768967
2873			[478][M+1]+		M543T434	7.23821	↓	0.673634	543.327	1.66551	0.00439565	0.027226	0	1.03488	0	0.311564	0.114578
4792			[881][M+1]2+		M921T74	1.23622	↑	1.3381	920.738	1.66429	0.0113301	0.0441646	0	1.00668	0	0.285715	0.538334
2559					M502T450	7.50525	↓	0.675923	502.293	1.66288	0.00299098	0.0219638	0	-1.06716	1.001	0.25901	0.8648
329					M149T477	7.95252	↓	0.351383	149.023	1.6622	0.016513	0.0550391	0	1.001	0	0.165226	0.0337073
2407			[368][M]+		M480T478	7.97258	↓	0.692336	480.308	1.66208	0.00474135	0.0283186	0	-0.481697	0	0.238293	1.19421
379			[52][M]+	[M+NH4]+ 141.058	M159T128	2.14067	↓	0.617003	159.092	1.65938	2.66974e-05	0.00199157	0	1.001	1.001	0.316231	0.527221
2057					M415T152	2.54149	↑	1.28723	415.24	1.65646	0.00353912	0.0241351	0	-1.001	0	0.21169	0.0881917
2761			[453][M+3]+		M527T511	8.52032	↓	0.693208	527.38	1.65457	0.00148056	0.0160444	0	1.001	1.001	0.290291	0.597702
3104			[534][M+1]+		M571T461	7.68365	↓	0.663511	571.358	1.6542	0.00327504	0.0230694	0	1.00086	0	0.266339	0.571834
2255					M452T448	7.46602	↓	0.607546	452.373	1.64557	0.0209718	0.0626204	0	1.04568	-1.001	0.2315	0.593131
95					M110T79	1.31396	↓	0.459529	110.035	1.645	0.00594584	0.0319814	0	1.00102	1.30877	0.200461	0.101157
716			[102][M]+		M205T55	0.922984		1.1829	205.118	1.64455	0.0674575	0.120731	0	0	0	0.126245	1.08464
1452			[189][M+2]+		M309T51	0.849945	↑	1.39185	308.583	1.64281	0.0237237	0.0669751	0	1.08714	-1.001	0.220202	1.35971
87					M107T359	5.97939	↓	0.466263	107.049	1.64159	0.0305797	0.0775101	0	-1.00174	1.23881	0.148786	0.38388
2114			[308][M+1]+		M427T443	7.37843	↓	0.633454	427.361	1.6406	0.0149858	0.052177	0	-1.02373	1.001	0.223249	0.697678
782					M215T46	0.773952	↓	0.522161	215.017	1.63806	0.616396	0.399233	0	0	0	0.0205546	0.139962
1982			[283][M+4]2+		M404T373_2	6.21089	↑	1.4323	404.048	1.63584	0.00476131	0.0283793	0	-1.47472	1.62664	0.300906	0.451419
2439					M485T197_1	3.276		1.06781	484.745	1.63437	0.0356609	0.0844327	0	-1.09551	0	0.156272	0.240107
4025			[714][M+1]2+		M718T192_2	3.19275	↑	1.53083	718.318	1.63378	0.0136277	0.0494083	0	0.480208	-1.001	0.24805	0.0168699
2689			[439][M]+		M518T434	7.23353	↓	0.589696	518.324	1.63341	0.00755111	0.0362116	0	1.001	1.001	0.260735	1.10977
238					M136T77	1.28248	↓	0.590471	136.039	1.63299	0.00234409	0.0197496	0	0	0	0.262753	0.436865
666	Cyclo (Pro-Thr)				M199T92	1.52588	↓	0.519065	199.108	1.63265	0.000406293	0.00844793	0	1.00099	1.001	0.295075	0.962037
3047			[515][M+1]+		M561T479	7.99146	↓	0.725914	561.314	1.63248	0.0005321	0.00979404	0	1.02122	-1.001	0.286669	0.549265
4018		isotope of M714T95	[710][M+1]+		M715T95	1.57853	↑	1.33409	715.238	1.62671	0.000938554	0.0129622	0	0.951023	1.25052	0.347132	0.285737
4159		peak split of M743T284_2	[743][M+1]5+		M743T284_1	4.73715	↑	1.53264	742.559	1.62593	0.00139037	0.015572	0	-0.738739	-0.585075	0.348	0.724386
1096					M255T345	5.75685	↓	0.63775	255.211	1.62584	0.00194498	0.0181183	0	1.13905	0.49253	0.251856	0.661086
1347					M292T253	4.21133	↑	2.24883	292.118	1.62429	0.0191601	0.0596211	0	0.768023	-1.001	0.212467	1.09196
2846					M539T225_1	3.75427	↑	1.58653	538.53	1.62035	0.00482341	0.0285666	0	1.09795	0	0.288243	0.219714
318	Lysine			[M+NH4]+ 129.079	M147T80	1.33416	↓	0.598273	147.113	1.61932	0.000740565	0.0116303	0	1.9224	0	0.271746	0.294826
539					M183T289	4.81247	↑	2.39553	183.078	1.61821	0.0803978	0.132929	0	0.215136	0	0.186601	1.15633
2696			[438][M+1]+		M519T471	7.84598	↓	0.696365	519.325	1.61788	0.000124543	0.0042968	0	0.802833	1.001	0.325683	0.370902
9			[1][M]+		M72T32	0.527739	↓	0.69364	72.0809	1.61745	0.000610678	0.0105385	0	0.972525	0	0.291704	0.14917
2503			[393][M]+	[M+H]+ 493.317	M494T442	7.36792	↓	0.644235	494.324	1.61704	0.0029808	0.0219334	0	-1.001	0	0.271014	0.374746
3737					M671T305	5.0763	↓	0.718181	671.014	1.61595	0.000402547	0.00840764	0	-1.60053	1.001	0.329334	1.64366
4004			[710][M]+		M714T95	1.57794	↑	1.30961	714.236	1.61584	0.00332036	0.0232429	0	-1.001	-0.114292	0.304056	0.255037
3849			[676][M+3]5+		M690T271_1	4.51683	↑	1.33935	689.511	1.61343	0.00349416	0.0239555	0	1.01365	0	0.278626	0.700124
22					M85T22	0.363054	↓	0.30748	85.0283	1.61222	0.195052	0.213444	0	1.001	0	0.116005	0.968039
3847			[676][M+1]5+		M689T271_2	4.51879	↑	1.37328	689.111	1.61213	0.00296206	0.021877	0	1.00105	-1.41214	0.28109	0.832682
4646					M861T272_2	4.52669	↑	1.46583	861.14	1.61175	0.0118105	0.045325	0	-1.00825	0.739044	0.268144	0.95615
1663					M342T372	6.19364	↑	1.9182	342.264	1.61108	0.0011702	0.0143279	0	-1.01844	0	0.295446	1.53742
197					M130T283	4.71923	↓	0.569048	130.065	1.6106	0.0029437	0.0218214	0	0.999642	0	0.268003	0.913393
2566					M503T452	7.53202	↓	0.644311	503.296	1.60894	0.00411137	0.026265	0	-0.904454	1.001	0.249577	0.531008
1099					M256T52	0.869705	↑	1.53393	256.079	1.60637	8.49099e-05	0.00359262	0	1.50356	2.83502	0.472292	0.138773
1560					M326T529	8.81701		0.86461	326.305	1.60338	0.0103788	0.0420796	0	0.840987	0	0.22359	0.570524
2899			[483][M+1]+		M547T511	8.51905	↓	0.689338	547.356	1.59992	0.00301792	0.0220438	0	-1.1571	0	0.259242	0.300132
1403					M300T411	6.84319		0.814404	300.29	1.59659	0.0137861	0.0497429	0	1.05476	-1.001	0.210767	0.106946
3255			[565][M]+		M600T26	0.428824		1.05524	600.182	1.59614	0.0930976	0.143218	0	1.001	1.001	0.156939	0.656472
2177			[323][M]+		M438T33	0.543364		0.919631	437.973	1.59355	0.362048	0.296985	0	0	0	0.072888	0.182381
1647			[226][M]2+		M339T373	6.2164	↑	1.43184	339.055	1.59235	0.00891709	0.0392924	0	0.937753	-1.24711	0.260632	0.193302
1642					M338T177	2.94875	↑	1.37222	338.436	1.59098	0.0042929	0.0268855	0	0	-1.001	0.207381	0.384961
3759					M675T274_2	4.55955	↑	1.33139	674.902	1.5899	0.00100332	0.0133308	0	1.01533	0.477306	0.314125	0.344046
3763					M675T274_4	4.55955	↑	1.31167	675.303	1.58952	0.00113029	0.0140993	0	-1.02883	0	0.311628	0.00756494
663					M199T74	1.22591	↓	0.638849	199.083	1.58723	0.0143795	0.0509685	0	0.31677	0	0.25035	0.88446
4921			[914][M+2]+		M994T471	7.84585	↓	0.529683	993.683	1.58677	0.0222776	0.0647147	0	-1.0747	0	0.202301	0.381078
4649			[846][M]4+		M862T272_1	4.52712	↑	1.42341	861.639	1.58515	0.0113413	0.044192	0	1.001	0.240299	0.264956	0.825933
3395			[592][M+2]+		M618T386	6.42575	↓	0.687897	618.182	1.58176	0.0201532	0.0612468	0	-1.001	0	0.215356	0.529117
3373			[589][M+1]+		M615T386	6.42578	↓	0.698282	615.184	1.58158	0.00930453	0.0400773	0	-1.001	0	0.242405	0.108582
2866					M542T80	1.33023	↑	1.58472	542.23	1.57747	0.00510329	0.0294282	0	1.20575	0	0.280268	1.76845
1387					M297T513	8.54339	↑	1.26684	297.24	1.57732	0.00236147	0.0198176	0	-0.983399	-0.622718	0.313902	0.930422
4163			[743][M+3]5+		M743T284_3	4.74107	↑	1.51916	742.959	1.57721	0.0016622	0.0169314	0	-1.06967	0	0.344173	0.736766
1426			[186][M+1]+		M305T258	4.30587	↑	1.22448	305.158	1.57678	0.113519	0.159338	0	-1.00315	1.001	0.150623	1.39294
3368			[589][M]+		M614T385	6.42447	↓	0.689201	614.181	1.57454	0.0180094	0.0577032	0	0	0	0.218993	0.341794
143			[19][M+1]+		M119T24	0.406744	↑	1.28887	119.09	1.57255	0.00141198	0.0156846	0	-1.09748	-1.39676	0.306631	0.226132
2236					M448T426	7.09744	↓	0.687337	448.342	1.5702	0.0218117	0.0639807	0	1.00043	0	0.238902	0.641846
1389					M298T130	2.17352	↑	1.88928	298.097	1.56634	0.0314636	0.0787837	0	-0.340837	0	0.189083	0.300391
756					M211T76	1.26856	↓	0.559611	211.032	1.563	0.0163378	0.0547232	0	1.08848	0	0.221685	0.756599
3557					M640T24	0.400876	↑	1.50562	640.16	1.5618	0.0010386	0.013542	0	0.521051	0	0.288796	0.698479
1910			[269][M]+		M390T141	2.34251	↑	1.45088	390.187	1.56126	0.0154814	0.0531332	0	0.919532	0	0.213271	0.603668
1196					M269T82	1.36327	↓	0.792497	269.113	1.5611	0.0172792	0.0564259	0	1.19369	0.419245	0.238097	0.31418
1458					M309T28	0.472042	↑	1.23844	309.094	1.56023	0.0230196	0.0658796	0	1.001	-1.001	0.198599	0.460826
2509			[393][M+1]+		M495T442	7.36724	↓	0.662866	495.328	1.55945	0.00654521	0.0335983	0	-0.911094	0	0.253862	0.441753
885			[121][M]+		M229T91	1.51405		0.873914	229.032	1.55668	0.3126	0.274121	0	-0.997675	0	0.0715453	0.403776
1664			[228][M]+	[M+H]+ 342.147	M343T466	7.7625	↑	1.35375	343.154	1.55575	0.0157622	0.0536631	0	1.00064	0	0.220707	0.949474
2282			[344][M]+		M459T373	6.21445	↑	1.4036	459.069	1.55392	0.0161642	0.054407	0	1.45392	1.37538	0.245359	0.098027
2013			[292][M]3+		M409T192_1	3.20135	↑	1.30221	408.558	1.55238	0.00783591	0.036898	0	1.00535	-1.001	0.230542	0.292211
2345			[354][M]+		M470T60	0.997466		1.19264	470.144	1.55199	0.0149282	0.052064	0	-1.51508	0	0.208121	1.36598
3406			[592][M+3]+		M619T385	6.42409	↓	0.71014	619.185	1.55198	0.00478105	0.0284391	0	-0.896442	0	0.264333	0.178027
2911			[483][M+2]+		M548T511	8.52046	↓	0.707815	548.359	1.55164	0.000550965	0.00997769	0	0.593575	0	0.305923	0.419834
4581					M844T274_1	4.55984	↑	1.41618	843.63	1.55088	0.00406337	0.0260967	0	-0.470667	-0.124823	0.303683	0.584785
2697			[439][M+1]+		M519T434	7.23364	↓	0.619688	519.327	1.54817	0.00866265	0.0387571	0	1.00483	0	0.250576	1.05192
2547					M500T433	7.22055	↓	0.660858	500.277	1.54757	0.00186549	0.0178057	0	-0.894775	1.001	0.272514	0.057202
1988					M405T167_1	2.77822	↑	1.29075	404.555	1.54596	0.00691944	0.0345951	0	1.001	0	0.253217	0.116508
2827					M536T530	8.83086	↓	0.76113	536.408	1.54571	0.0413873	0.0912166	0	-1.13811	0	0.178717	0.108351
2576			[409][M]+		M504T467	7.77896	↓	0.71599	504.308	1.54504	0.00636116	0.0331177	0	1.06399	0.0993052	0.234255	0.847633
817					M219T101	1.67712		1.03852	219.134	1.54462	0.315827	0.275676	0	1.00447	0	0.0718336	0.29013
2755			[456][M]+		M526T450	7.50739	↓	0.720495	526.293	1.54438	0.0100105	0.0414202	0	0	-1.001	0.21863	0.403565
1981					M404T167_1	2.77651	↑	1.28285	403.887	1.54302	0.00833565	0.0380444	0	-1.00028	0	0.24098	0.255387
3212					M592T289_1	4.81298	↑	1.57594	591.643	1.54215	0.0023486	0.0197673	0	0.0116548	-1.001	0.296938	0.631211
734			[104][M]+		M207T91	1.51027	↑	1.2851	207.05	1.54091	0.0470762	0.0982475	0	1.00152	0	0.14688	0.173467
3249			[564][M+1]2+		M599T236_2	3.93058	↓	0.61928	599.301	1.54064	0.147043	0.184083	0	0.984983	0	0.102532	0.603606
3242			[564][M]2+		M599T236_1	3.93022	↓	0.614866	598.799	1.53828	0.456437	0.336574	0	1.30628	0	0.033208	0.795385
631			[87][M+1]+		M194T33	0.54391	↑	1.29504	194.038	1.5354	0.0248783	0.0687088	0	1.25684	0	0.220881	0.00849606
2012			[291][M]+		M408T516	8.59758	↑	1.43356	408.23	1.52902	0.0319267	0.0794386	0	1.001	0	0.247975	0.438855
1887		isotope of M385T516	[262][M+1]+		M386T516	8.5961	↑	1.4929	386.157	1.5276	0.000876566	0.0125811	0	-1.001	1.001	0.349473	0.673782
4787					M919T74	1.23293	↑	1.24315	919.238	1.52664	0.0251	0.0690333	0	-0.997853	0	0.251106	0.00144283
339					M151T20	0.333702	↓	0.419736	151.047	1.52352	0.0122726	0.046408	0	1.39834	0	0.254219	0.7475
3235					M597T464	7.73698	↓	0.532706	597.27	1.52297	0.00322399	0.0228713	0	1.0011	1.001	0.249228	0.100883
2540					M500T228_1	3.7981	↑	1.25028	499.612	1.52172	0.00962389	0.0406982	0	0.951747	-1.40275	0.239324	0.603457
3850			[676][M+4]5+		M690T271_2	4.51852	↑	1.32239	689.711	1.52066	0.0060681	0.0323237	0	-1.001	0	0.268776	0.710028
1716					M352T91	1.51261	↑	1.2504	352.009	1.52007	0.0499835	0.101803	0	0.0495095	0	0.155199	0.332269
4166			[743][M+4]5+		M743T284_4	4.7399	↑	1.47131	743.16	1.51925	0.00118819	0.0144282	0	0.0267076	1.21896	0.344066	0.666421
1533					M320T56	0.937471	↑	1.36061	320.091	1.51862	0.0400911	0.0897645	0	-0.989628	0	0.187417	0.298286
4531					M830T303_2	5.04204	↓	0.738249	830.323	1.51843	0.000146279	0.0046205	0	-0.986182	0.35389	0.346873	0.0702338
611					M192T188_1	3.12629	↑	1.36917	191.625	1.51831	0.0862946	0.137891	0	-0.727811	1.001	0.123339	0.985473
3309					M608T294	4.89531	↓	0.766454	607.955	1.51724	0.00805812	0.0374166	0	-0.469548	1.53446	0.305476	0.272056
2324			[349][M]+		M466T522	8.70467		0.858967	466.329	1.51555	0.0184764	0.0584952	0	1.45393	0	0.175604	0.719575
19				[M+Na]+ 59.9559	M83T19	0.315625	↓	0.566001	82.9449	1.51481	0.249485	0.241811	0	1.37638	0	0.143542	0.103291
1167			[154][M]+		M265T170	2.82599	↑	1.71745	265.155	1.51349	0.10188	0.15026	0	-1.19439	0	0.123458	0.290149
2528			[396][M+2]+		M498T471	7.84537	↓	0.745764	498.345	1.51281	0.0138323	0.04984	0	-1.00916	0	0.246788	0.236078
909					M231T116	1.94138		1.1694	231.17	1.51263	0.287768	0.262011	0	1.01074	0	0.0994415	0.174864
937			[129][M]+	[M+NH4]+ 218.04	M236T373	6.21842	↑	1.42186	236.074	1.512	0.000317135	0.00737962	0	1.43745	1.001	0.299033	0.223471
224			[29][M+1]+		M133T128	2.14036	↓	0.612521	133.084	1.51166	0.00215608	0.0189782	0	1.61222	0	0.265241	0.45825
2285			[344][M+1]+		M460T373	6.21076	↑	1.37312	460.072	1.51083	0.00613305	0.0325028	0	-0.448525	0	0.285632	0.0862958
67					M102T68	1.14144	↓	0.583391	102.128	1.51077	0.0206819	0.0621395	0	1.08253	0	0.196196	1.21877
777			[107][M+1]2+		M215T22	0.373011	↑	1.35961	214.552	1.51072	0.00244711	0.0201449	0	1.02941	1.001	0.315572	0.919401
2497			[390][M]3+		M493T150_1	2.49954		0.800837	492.603	1.51023	0.333738	0.28425	0	0	0	0.083264	0.954954
1759				[M+NH4]+ 342.147	M360T466	7.76017	↑	1.54592	360.18	1.51	0.004579	0.0278154	0	-0.317599	-1.41591	0.247472	0.369713
3848			[676][M+2]5+		M689T271_3	4.51863	↑	1.32483	689.311	1.509	0.00747118	0.0360144	0	-1.00121	0	0.254256	0.839623
51				[M+K]+ 57.9589 [M+Na]+ 73.9332	M97T19	0.315665	↓	0.72389	96.9221	1.50781	0.366439	0.298877	0	-0.39009	0	0.11471	0.222323
2750					M526T47	0.783608	↑	1.53827	525.565	1.50489	0.165962	0.196609	0	0.984425	0	0.169848	0.794169
2769			[459][M+1]5+		M528T230_2	3.83985		1.19742	528.489	1.50412	0.0171607	0.056214	0	-1.00127	0	0.259362	0.265634
1793			[247][M]+	[M+Na]+ 342.147	M365T466	7.75917		0.954084	365.136	1.50017	0.104506	0.152321	0	0	0.461868	0.132571	0.0622653
733				[M+K]+ 168.051	M207T20	0.325781	↓	0.645323	207.014	1.49768	0.124537	0.167242	0	0.500343	0	0.16194	0.826176
2632			[423][M]+	[M+Na]+ 488.22	M511T506	8.43417	↓	0.591106	511.209	1.49626	0.00698237	0.0347623	0	0.998787	0	0.215299	0.270401
68			[8][M]+	[M+H+MeCN]+ 61.0205	M103T95	1.58032	↓	0.702297	103.055	1.49549	0.000935251	0.0129426	0	1.55968	0	0.305446	0.4893
1011			[136][M]+		M245T189	3.15289		1.08199	245.186	1.49185	0.154988	0.189512	0	0	1.001	0.0954207	0.966005
697			[98][M]+		M203T17	0.277447	↑	1.41143	203.223	1.48892	0.247417	0.24078	0	1.29197	-1.001	0.0560692	0.0891008
1833					M374T60	0.99245	↑	1.22225	374.162	1.48534	0.00230641	0.0196003	0	0.998653	-0.0188545	0.326521	0.637887
1410					M302T416	6.93		0.938216	302.306	1.48222	0.0504383	0.102349	0	1.50812	0	0.167192	0.153418
4395					M789T401	6.68137	↓	0.677039	789.466	1.48175	0.00351802	0.024051	0	-1.00201	0	0.260598	0.533743
210					M131T80_2	1.34053	↓	0.704168	131.045	1.48043	0.000978892	0.0131951	0	1.41838	0	0.247128	0.347957
1070					M251T363	6.05231	↓	0.740919	251.128	1.47935	0.00017815	0.00509085	0	1.00955	1.25696	0.305126	0.90672
2677			[434][M]+		M517T80	1.32659		1.18435	517.164	1.47865	0.134041	0.174616	0	0.972077	-1.001	0.147313	0.178678
705	Acetylcarnitine		[100][M]+	[M+H+H2O]+ 185.105 [M+H]+ 203.116	M204T23	0.376542	↑	1.22604	204.124	1.4783	0.0057593	0.0314462	0	1.39095	0	0.25926	0.866843
1368			[178][M+2]+		M295T25	0.413353	↑	1.30278	295.103	1.478	0.0182978	0.0581945	0	1.00061	0	0.208456	0.0192133
1401				[M+NH4]+ 282.167	M300T156	2.59504	↓	0.787531	300.201	1.47792	0.00203925	0.0184746	0	-0.606259	-0.566067	0.291136	0.288703
141					M119T95	1.57881	↓	0.627555	119.073	1.47716	0.0029752	0.0219166	0	-1.001	0	0.247748	0.542431
3846			[676][M]5+		M689T271_1	4.51784	↑	1.33803	688.91	1.47331	0.00680828	0.0342963	0	-0.996761	-1.001	0.260694	0.721684
2720			[444][M+2]+		M522T454	7.56655	↓	0.724181	522.345	1.47186	0.00446705	0.0274582	0	-1.41058	0	0.269987	1.06712
1955					M398T420	7.00564		0.805369	398.327	1.47136	0.0103666	0.0420583	0	1.39247	0	0.234007	0.039025
30				[M+H]+ 87.014	M88T23	0.378632	↓	0.548943	88.0214	1.46995	0.0849711	0.136807	0	1.53296	0	0.130405	0.495143
459	Unknown	Reported			M169T102	1.70733	↓	0.68024	169.133	1.46966	0.0100918	0.041568	0	0.0285409	0	0.228796	1.30343
856					M224T91	1.513	↑	1.29909	224.076	1.46953	0.0489495	0.100546	0	0.131701	0	0.159299	0.522518
2868			[477][M]+		M542T454	7.57153	↓	0.713831	542.321	1.46878	0.00953831	0.040534	0	0.0899104	-1.001	0.23524	0.221049
18				[M+Na]+ 57.9589	M81T19	0.315811	↓	0.576129	80.9479	1.46834	0.528161	0.364206	0	-0.999837	0	0.0875991	0.242366
968					M239T133	2.22248	↓	0.691295	239.148	1.46798	0.00141463	0.0156983	0	-1.00099	0	0.241583	0.438111
201				[M+H]+ 129.079	M130T80	1.33648	↓	0.708572	130.086	1.46639	0.0016804	0.0170144	0	-0.0786801	0	0.235557	0.716491
1565					M328T61	1.01017	↑	1.8061	327.681	1.46536	0.000757087	0.0117552	0	0.95957	0.947819	0.251024	0.992807
1361			[179][M]+		M294T78	1.29369		0.914219	294.155	1.4652	0.148862	0.185348	0	-1.001	1.001	0.135417	1.49431
2727					M523T172_1	2.86016	↑	1.24357	522.792	1.46138	0.0052332	0.0298456	0	-1.001	0	0.2421	0.492604
39					M92T146	2.43617	↓	0.557947	92.0603	1.46021	0.000620006	0.010624	0	1.001	0	0.263375	1.54125
1012			[137][M]+		M245T176	2.93949	↑	1.25706	245.186	1.45949	0.29397	0.265118	0	0.858934	0	0.0963411	0.0542757
2643					M513T286_2	4.77402	↓	0.735818	512.762	1.4564	0.0010057	0.0133438	0	-0.996064	0	0.284966	0.606945
788			[108][M+1]+		M216T30	0.508014	↓	0.588061	216.02	1.4562	0.967946	0.510655	0	-0.99445	0	0.0157443	0.276689
2309					M465T229_1	3.81008	↑	1.24813	464.516	1.45469	0.0540744	0.106574	0	0	0	0.15857	1.13027
4791			[881][M]2+		M920T74_2	1.23368	↑	1.30537	920.237	1.45367	0.0148147	0.0518403	0	1.27227	0.0403897	0.268057	0.0643713
2412			[368][M+1]+		M481T478	7.97342	↓	0.668729	481.312	1.4522	0.0144596	0.0511307	0	1.02614	1.001	0.205566	0.67235
1319				[M+H]+ 287.195	M288T50	0.835926	↑	1.31334	288.203	1.45172	0.0383854	0.0877817	0	-1.001	0	0.202459	0.756529
4579			[831][M]+		M843T274_2	4.55974	↑	1.38806	843.379	1.45019	0.00616057	0.0325782	0	-1.001	1.46071	0.289285	0.858529
1481			[194][M+1]+		M311T32	0.530351		1.10207	311.116	1.44943	0.161807	0.193974	0	1.001	0	0.122454	0.518303
2819					M535T169_1	2.82284		0.841633	534.742	1.44941	0.237738	0.235841	0	-0.977683	0	0.112535	0.549331
1935					M394T135	2.25745	↓	0.79006	394.164	1.44658	0.0014757	0.0160192	0	1.33169	0.853387	0.303558	0.0459326
1328			[172][M+1]3+		M290T118_2	1.96609	↑	1.27388	289.841	1.44595	0.00991423	0.0412433	0	0.971837	0	0.179463	0.570825
1128			[147][M]+		M261T80	1.33323	↑	1.25013	261.145	1.44487	0.0599754	0.112937	0	0.999739	1.001	0.180111	0.67423
625			[89][M]+		M193T41	0.687356	↓	0.713408	193.097	1.44233	0.0158494	0.0538259	0	1.001	0	0.195326	0.91654
133	Betaine		[19][M]+		M118T24	0.400382		1.17524	118.087	1.44206	0.0354557	0.0841709	0	1.18608	1.001	0.177189	0.32099
58					M100T131	2.18923	↑	1.4549	100.076	1.44201	0.034668	0.0831526	0	-1.06243	1.001	0.235964	0.0718057
1962			[282][M]6+		M400T194	3.23517	↑	1.21405	400.394	1.44	0.0158016	0.0537368	0	1.001	0	0.279245	0.338768
174					M125T94	1.57376		0.812826	125.071	1.43944	0.0186061	0.0587118	0	0.182011	0	0.242728	0.209544
1241			[163][M+1]+		M277T211	3.5102	↑	1.68357	277.126	1.43859	0.0774001	0.130271	0	-0.990824	0	0.178519	0.312462
473				[2M+H]+ 85.0526	M171T73	1.22435	↓	0.779098	171.113	1.43843	0.00114679	0.0141949	0	-1.07031	1.67482	0.273731	0.848472
4080					M727T295_1	4.91104	↓	0.599586	726.675	1.43754	0.0024623	0.0202016	0	-0.445004	1.12316	0.238729	0.866165
3766			[663][M+1]+		M676T274_2	4.55994	↑	1.33605	675.703	1.43752	0.00143003	0.0157772	0	1.15085	-1.001	0.30219	0.344676
1014					M246T465	7.75524	↑	1.32427	246.064	1.43623	0.00556758	0.030879	0	1.00051	0	0.232436	0.286455
2966			[496][M+2]+		M552T517	8.61809	↓	0.69092	552.393	1.43453	0.0143577	0.0509243	0	-0.710494	1.001	0.212519	0.42452
2718					M522T172	2.86099	↑	1.2431	522.29	1.43445	0.00717458	0.0352643	0	-1.001	-1.001	0.241494	0.515293
2336					M469T459	7.65364	↑	1.27235	469.042	1.43391	0.0130305	0.0481171	0	0.99874	-1.001	0.204	0.748881
127					M118T258	4.30167	↑	2.08402	118.065	1.43326	0.0180164	0.0577151	0	-0.254686	0.59981	0.260684	0.685307
3141					M578T70	1.16212	↑	1.39769	578.297	1.43152	0.000781691	0.0119361	0	0.964134	0.984099	0.374411	0.631196
458					M169T196	3.26735	↓	0.703918	169.12	1.43106	0.0272552	0.0724304	0	1.16363	0	0.200791	0.153741
2028			[296][M+1]7+		M411T205_2	3.42112		0.893672	410.647	1.43073	0.181673	0.206031	0	1.001	0	0.112973	0.92104
1986					M404T167_2	2.77761	↑	1.23956	404.221	1.42936	0.00437828	0.027169	0	-0.558864	0	0.24593	0.444324
2760			[456][M+1]+		M527T451	7.50839	↓	0.771364	527.296	1.42861	0.00856585	0.038549	0	1.00019	0	0.231705	0.167255
1644					M339T177_1	2.94864	↑	1.39065	338.687	1.42852	0.0090978	0.039663	0	-1.00086	0	0.188579	0.677503
3377			[592][M]+		M616T386	6.42794		0.816733	616.178	1.42828	0.088614	0.139753	0	1.001	0	0.16815	0.537094
2759				[M+K]+ 488.22	M527T506	8.43417	↓	0.730658	527.183	1.42546	0.00457748	0.0278106	0	1.38564	-1.001	0.224865	0.430944
3147			[543][M+2]6+		M580T284_1	4.72725	↑	1.37603	580.133	1.42516	0.0224946	0.0650517	0	0.999394	-0.261017	0.231443	1.75231
1309			[169][M]+		M286T398	6.6324	↑	1.36808	286.144	1.42481	0.0475208	0.0987902	0	0.826207	-1.001	0.204653	1.09593
4272					M761T315	5.24787	↓	0.707023	760.663	1.42475	5.45374e-05	0.0029135	0	-1.00101	0	0.315088	0.0728938
3081			[528][M]+		M566T453	7.55799	↓	0.730399	566.321	1.4246	0.00980332	0.0410372	0	1.0075	-0.59892	0.23169	0.418882
122	Proline		[16][M]+		M116T22_2	0.372869		1.17828	116.071	1.42459	0.0144618	0.0511352	0	0.829346	0	0.264625	0.18877
660			[92][M+1]+		M198T159	2.64417	↓	0.735686	198.131	1.42384	0.000150491	0.004677	0	1.09391	1.55648	0.360772	1.3856
2471					M489T211	3.51036	↓	0.735227	489.056	1.42337	0.446902	0.332692	0	0.781606	0	0.039549	0.202616
113				[M+K]+ 75.9303	M115T19	0.312171		0.811516	114.894	1.4231	0.997123	0.518073	0	-0.00376561	0	0.0211224	0.0460707
3065					M563T282	4.70302	↑	1.53164	563.237	1.42268	0.00617714	0.0326234	0	-0.824846	0	0.284162	0.234977
781			[108][M]+	[M+Na]+ 192.027	M215T30	0.498173		0.816323	215.017	1.42264	0.824378	0.470554	0	-0.997355	0	0.00466518	0.372174
1007					M245T91	1.51179		0.93566	245.006	1.4196	0.165363	0.196233	0	1.1544	-1.001	0.0954418	0.0681852
3765					M676T274_1	4.56009	↑	1.29967	675.503	1.41945	0.00216417	0.0190128	0	0.957171	0	0.290106	0.0168866
1388					M298T172	2.86464	↑	2.02746	297.665	1.41901	0.114808	0.160299	0	0.992527	-1.001	0.135689	0.190409
1969			[281][M+1]+		M401T438	7.29906	↓	0.627453	401.346	1.41894	0.0561167	0.108842	0	1.00066	0	0.144235	0.0623547
4558					M840T313	5.21536	↓	0.763657	840.206	1.41768	8.32338e-06	0.000918829	0	1.16034	-1.15519	0.394987	0.232141
86					M107T95	1.5796	↓	0.704706	107.049	1.41725	0.000879989	0.0126029	0	0.0796989	0	0.289567	0.655284
892					M229T133	2.2195	↑	1.7319	229.154	1.41532	0.0104711	0.0422408	0	0.0334697	-1.001	0.204873	0.831938
103				[M+K]+ 73.9332	M113T19	0.312292		0.884897	112.897	1.41491	0.897872	0.49187	0	0.690205	1.001	0.00944385	0.34619
1181					M267T132	2.2002	↑	1.60553	267.134	1.41451	0.0743846	0.1275	0	-0.999253	-1.001	0.14025	0.517189
2311					M465T229_2	3.8118	↑	1.2523	464.766	1.41353	0.0353528	0.084039	0	-0.262691	0	0.169148	1.02889
2192					M441T231_1	3.84669	↑	1.32747	440.574	1.41268	0.0121278	0.0460721	0	0	-1.001	0.275774	0.0538437
1643					M339T37	0.620418		1.18263	338.574	1.41182	0.413688	0.3186	0	1.001	0	0.056351	0.724027
206					M131T22	0.369721	↓	0.584768	131.01	1.41122	0.0249868	0.068868	0	-1.05586	0	0.186719	1.12483
2308					M464T488	8.14137		0.904603	464.313	1.41043	0.0409666	0.0907502	0	-0.0180329	1.001	0.169336	0.49846
53				[M+K]+ 59.9559 [M+Na]+ 75.9303	M99T19	0.315332	↓	0.669399	98.9193	1.41024	0.56958	0.380597	0	-0.990379	0	0.0785098	0.422743
4262					M760T315_2	5.24859	↓	0.668282	759.911	1.40945	0.000504387	0.00951308	0	-1.001	1.001	0.28848	0.0286844
2344					M470T459	7.6533	↑	1.24746	470.041	1.40756	0.00477721	0.0284275	0	1.00678	0	0.205951	0.309658
1510			[198][M+1]+		M316T25	0.409225	↓	0.624587	316.083	1.40745	0.812196	0.466846	0	-0.123006	0	0.0151568	0.0482507
1794					M365T574	9.57172		0.878755	365.136	1.40679	0.134899	0.175265	0	1.14575	-1.001	0.127226	0.461372
2160			[318][M]+		M435T91	1.51493	↑	1.28584	435.074	1.40476	0.106879	0.15422	0	1.00724	0	0.140368	0.302485
696					M203T23	0.379958	↓	0.599902	203.14	1.40437	0.0668679	0.120127	0	-1.31097	0	0.156276	0.117602
2612					M509T460	7.67456	↓	0.737107	509.343	1.40039	0.0150307	0.0522646	0	1.32495	-1.001	0.228269	0.580567
622			[88][M]2+	[M+2H]2+ 384.121	M193T74	1.22737	↑	1.32232	193.068	1.39994	0.132032	0.173084	0	1.001	-1.001	0.129438	0.239294
771				[M+Na]+ 190.121	M213T300	4.99278	↓	0.63953	213.11	1.39913	0.00727174	0.0355133	0	0.0323035	1.36279	0.197992	0.697147
4729					M893T309	5.14657	↓	0.758741	893.454	1.3985	0.000958204	0.013077	0	-0.633179	0	0.293671	1.47145
1798			[247][M+1]+		M366T466	7.75917		0.994028	366.139	1.3984	0.139755	0.178869	0	-1.00108	0.832218	0.124988	0.526207
2637			[423][M+1]+		M512T506	8.43535	↓	0.640852	512.213	1.3979	0.00552405	0.0307477	0	1.12245	-1.001	0.221514	0.0134659
3786					M682T359_1	5.97779	↑	1.34596	681.541	1.39736	0.000408139	0.00846765	0	1.54254	-1.001	0.343207	1.07442
3758			[663][M]+		M675T274_1	4.56009	↑	1.32606	674.702	1.39618	0.00770245	0.0365795	0	1.001	0.408049	0.249165	0.691661
1873					M385T132	2.19527	↑	1.59218	384.715	1.39605	0.0542434	0.106764	0	0.820196	0	0.16843	0.00578595
1324				[M+K]+ 249.805	M289T19	0.318292	↓	0.666284	288.769	1.39485	0.556655	0.375512	0	0.810791	1.40275	0.0650047	0.487439
4578					M843T274_1	4.56016	↑	1.40629	843.128	1.39463	0.00583619	0.0316688	0	-1.39002	0	0.301933	0.490002
656					M198T161	2.68562	↓	0.729286	198.076	1.39311	0.0061064	0.0324295	0	1.1067	-0.419245	0.260674	0.173459
2592					M506T191	3.17801	↓	0.697556	505.767	1.3931	0.674146	0.420894	0	-1.001	1.001	0.0119494	1.05432
3904					M696T284_2	4.73023	↑	1.38935	695.758	1.39228	0.0149764	0.0521584	0	1.04092	0	0.233005	2.05439
1047					M249T23	0.377294	↑	1.40506	249.108	1.38797	0.00277855	0.0213022	0	1.68971	0	0.279533	0.363929
1568			[211][M]+		M328T99	1.6492	↓	0.798632	328.139	1.38757	0.249188	0.241663	0	-0.126666	1.001	0.10599	1.26743
1868			[258][M]+		M383T33	0.546198	↑	1.44554	383.075	1.38735	0.184971	0.207908	0	-1.00818	-0.418493	0.155646	0.0596454
2085					M422T414	6.90546	↓	0.746773	422.327	1.38595	0.0166082	0.0552094	0	1.83977	0	0.253236	0.0271359
699					M204T95	1.58161	↓	0.598826	204.042	1.38517	0.00330977	0.0232025	0	1.06788	-1.001	0.280327	0.351683
630			[88][M+1]2+		M194T74_1	1.23695	↑	1.35836	193.569	1.38345	0.0802711	0.132818	0	0	0	0.167955	0.0553791
796				[M+Na]+ 194.115	M217T110	1.8291		0.803464	217.105	1.38204	0.00140226	0.0156342	0	0.995177	1.001	0.284501	1.20423
2770			[459][M+2]5+		M529T231_1	3.84214	↑	1.20244	528.69	1.38112	0.0434387	0.0936453	0	0.193611	0	0.236379	0.55177
2920			[491][M+1]6+		M549T313_1	5.22238	↑	1.22178	548.633	1.38003	0.00967239	0.0407905	0	-1.001	0	0.227232	0.738895
2876			[478][M+2]+		M544T434	7.23833	↓	0.6504	544.33	1.37923	0.0145135	0.0512393	0	1.00697	1.001	0.269828	0.363048
2363					M474T143	2.37529	↑	1.35277	473.74	1.3791	0.0127299	0.047449	0	-1.2675	0	0.236605	1.14308
4583					M844T274_3	4.56311	↑	1.3971	844.129	1.37851	0.00857869	0.0385768	0	1.001	1.32004	0.291579	0.577368
2005			[290][M]3+		M408T212_1	3.54146	↓	0.749766	407.714	1.37577	0.81989	0.469194	0	0	0	0.00362504	0.125552
3037					M561T313_1	5.21318		1.13907	560.639	1.37546	0.00646446	0.0333891	0	0	0	0.224997	0.209701
415			[61][M]+	[M+H]+ 162.125	M163T268	4.46458	↑	2.21936	163.133	1.37405	0.172254	0.200481	0	1.001	1.001	0.142019	1.00273
2649			[425][M+1]+		M513T440	7.32757	↓	0.705175	513.338	1.37376	0.00483742	0.0286085	0	1.001	-1.001	0.240881	0.044501
2357					M473T142_1	2.37399	↑	1.39776	472.738	1.37312	0.024254	0.0677809	0	-1.38408	0	0.213458	0.8179
1262					M280T41	0.687687		0.853649	280.139	1.37241	0.263845	0.249583	0	-1.00094	-1.001	0.103261	1.42595
145	Threonine				M120T21	0.351758	↑	1.33994	120.066	1.37159	0.00104236	0.0135642	0	1.45859	0	0.32387	0.653936
92					M109T194	3.23371	↓	0.75646	109.101	1.37057	0.00239054	0.0199301	0	1.49546	1.001	0.212484	0.289729
350	Xanthine				M153T52	0.861012	↑	1.48219	153.041	1.36928	0.046165	0.0971223	0	0.976873	-1.001	0.166667	0.755599
529					M181T357	5.95584	↓	0.431059	181.086	1.36817	0.0128637	0.047748	0	0	-1.41428	0.220839	0.0651986
1702					M349T450	7.49398	↑	1.35756	349.06	1.36815	0.0028072	0.0213948	0	1.001	1.34882	0.314059	0.0222318
3901			[685][M]+		M696T284_1	4.72857	↑	1.46178	695.557	1.36715	0.0106334	0.0425202	0	-1.37677	1.41692	0.236457	1.93296
392					M161T22_1	0.366398	↓	0.596143	161.092	1.36624	0.0688385	0.122128	0	-0.915159	0	0.142111	0.593205
1639					M338T23	0.383117	↑	1.23467	338.101	1.36478	0.0741474	0.127278	0	-1.001	0	0.143171	0.933658
2815					M534T498	8.29522	↓	0.79737	534.391	1.36389	0.0478587	0.0991997	0	0.513343	0	0.194111	0.465573
2264					M454T469	7.82376		0.810893	454.293	1.36369	0.0187624	0.0589709	0	-1.12036	0	0.170273	0.634413
1574			[215][M]+		M329T44	0.740785		1.02804	329.073	1.36276	0.309926	0.272858	0	0	0	0.0915572	0.0941461
1485			[196][M]+		M311T400	6.67325	↑	1.46472	311.186	1.36225	0.00935478	0.0401765	0	0.998714	0	0.164682	0.420368
871				[M+Na]+ 204.1	M227T144	2.39212	↓	0.757936	227.089	1.36218	0.000473567	0.00918387	0	-1.38526	0	0.30735	1.30062
365					M156T151	2.52452	↑	1.45414	156.138	1.36169	0.00181185	0.0175858	0	1.29677	-1.001	0.30096	0.879756
1302					M284T25	0.418314	↑	1.40609	284.17	1.35911	0.00524333	0.0298778	0	0.177641	0	0.284317	1.15656
1263					M280T29	0.488236		1.02796	280.139	1.35878	0.355938	0.294317	0	-0.0868611	-1.001	0.0807588	1.20297
1927					M393T373	6.21088		0.975475	393.064	1.35842	0.0923905	0.142683	0	1.23145	-0.388573	0.166852	0.218547
56					M99T300	4.9921	↓	0.483904	99.0805	1.35779	0.018006	0.0576974	0	-1.001	-1.001	0.211662	1.39041
3905					M696T284_3	4.73096	↑	1.38699	695.959	1.35712	0.0107552	0.0427267	0	-1.00105	1.001	0.232882	1.5972
2885					M546T283_1	4.72048	↑	1.33681	545.553	1.35668	0.010381	0.0420835	0	0.537735	0	0.223743	0.592735
486				[M+H-H2O]+ 190.121	M173T300	4.99372	↓	0.608289	173.117	1.35616	0.0375375	0.0867643	0	-1.04944	0.604277	0.168103	0.711078
277					M142T143	2.37964	↑	1.24885	142.159	1.35588	0.0724915	0.125708	0	-0.618403	0	0.230572	0.643894
516			[73][M]2+		M179T22	0.372572	↑	1.30589	179.128	1.35462	0.00270961	0.0210747	0	-1.00123	-1.001	0.292309	0.309895
2933			[491][M+4]6+		M549T313_4	5.22238	↑	1.2277	549.134	1.35439	0.0043851	0.0271914	0	-1.44472	1.41653	0.248774	0.473119
4264					M760T315_3	5.24606	↓	0.677258	760.162	1.35367	0.000722964	0.011494	0	1.001	0	0.276398	0.423869
3907					M696T284_4	4.73035	↑	1.43089	696.159	1.3532	0.0120751	0.0459491	0	1.2239	0	0.235223	1.87707
1498					M314T156_1	2.60271	↑	1.20378	313.669	1.35281	0.0755097	0.128546	0	0.976172	0	0.136855	0.0089515
2275			[342][M+1]5+		M457T206_2	3.43912	↑	1.36985	456.844	1.35177	0.00148014	0.0160423	0	-1.39359	-1.001	0.275235	0.264526
3305			[576][M]6+		M608T317_1	5.28862	↑	1.27352	607.833	1.35114	0.00243418	0.0200963	0	-1.37804	-1.001	0.24381	0.987043
4523					M830T303_1	5.05435		0.810638	829.62	1.35103	7.06706e-05	0.0033132	0	1.80105	1.19804	0.328001	1.96947
1890			[260][M+2]+		M387T33	0.545431	↑	1.31196	387.065	1.34923	0.0500579	0.101892	0	-1.001	0	0.173623	0.0514493
241					M136T92	1.52573	↓	0.717389	136.076	1.34891	0.00101996	0.0134305	0	-1.001	1.001	0.268185	0.128801
1812					M368T383	6.38112	↑	1.7039	368.28	1.34888	0.00191683	0.0180093	0	0.636204	1.001	0.251696	0.472182
4642					M860T296	4.92565	↓	0.734767	860.335	1.34852	9.47571e-05	0.00375599	0	1.00111	0	0.3258	0.670036
1775			[244][M]+	[M+H]+ 362.165	M363T516	8.59736	↑	1.50263	363.172	1.34775	0.00786408	0.0369646	0	-0.961651	-1.001	0.326401	0.351093
3161			[545][M+1]6+		M582T287_2	4.7898		1.18624	582.141	1.34727	0.0112139	0.0438783	0	1.05625	0	0.185821	0.391818
5					M69T196	3.27205	↓	0.664876	69.0697	1.34709	0.00338921	0.0235287	0	-0.140208	-0.311742	0.22522	0.117267
2007					M408T212_2	3.541	↓	0.756872	407.881	1.34684	0.583638	0.386211	0	1.00109	0	0.0215802	0.00427168
1126					M261T112	1.86733	↑	1.43779	261.145	1.34634	0.0409292	0.0907086	0	-0.994569	0	0.158833	0.109737
1947			[277][M]+		M397T128	2.13813		1.19547	397.178	1.34626	0.00124952	0.0147902	0	-1.23634	1.30202	0.292015	0.702427
739					M208T224	3.74093	↓	0.583195	208.029	1.34398	0.0137013	0.0495642	0	-1.001	0	0.193688	0.590335
3853			[676][M+5]5+		M690T271_3	4.51801	↑	1.28677	689.912	1.34363	0.00816863	0.0376692	0	0	0	0.246796	0.965938
3915				[2M+H]+ 348.047	M697T45	0.747021		0.864053	697.103	1.34355	0.93034	0.50075	0	1.0012	1.001	0.0398346	0.0446627
1588			[218][M]+	[M+K]+ 292.091	M331T24	0.407759	↓	0.653562	331.054	1.34349	0.511344	0.35777	0	-0.994538	0	0.00980359	0.378651
2891			[481][M+2]+		M546T453	7.55726	↓	0.761995	546.346	1.34336	0.0103623	0.0420508	0	1.00183	-1.001	0.233738	0.672269
2274			[342][M]5+		M457T206_1	3.43738	↑	1.31968	456.644	1.34285	0.00572183	0.0313367	0	1.21695	0	0.246913	0.154029
2058					M416T153_1	2.54219	↑	1.24464	415.574	1.34212	0.0347175	0.0832173	0	1.001	0	0.157496	0.118772
2053					M415T153	2.54203	↑	1.22934	414.906	1.34008	0.0408953	0.0906708	0	-0.862696	0	0.155333	0.153687
523				[M+K]+ 141.941	M181T18	0.305709	↓	0.793044	180.904	1.33936	0.891258	0.490022	0	-1.00098	0	0.023001	0.128728
4267					M760T315_4	5.2448	↓	0.692301	760.412	1.33909	0.000990684	0.0132611	0	0.985003	0	0.269405	0.338324
93					M109T280	4.66176	↓	0.667627	109.102	1.33609	0.0278133	0.0733139	0	0	0	0.16483	0.426212
482					M173T22	0.359731	↓	0.519885	173.042	1.33556	0.208156	0.220216	0	-1.001	1.001	0.128275	0.02865
349					M153T86	1.43811		0.837903	153.041	1.33507	0.0255024	0.069637	0	1.10823	0	0.229954	0.407914
2883			[480][M+1]+		M545T479	7.99154	↓	0.677814	545.34	1.33505	0.0255464	0.069703	0	1.001	0	0.200212	0.0527726
1784		isotope of M363T516	[244][M+1]+		M364T516	8.59721	↑	1.4474	364.175	1.33463	0.00386515	0.0253825	0	1.31664	0	0.345464	0.323067
1052			[140][M+2]+		M249T153	2.55634	↓	0.74793	249.15	1.33449	0.016117	0.0543207	0	1.0126	-1.001	0.232607	0.165207
1402					M300T519	8.65042		0.883462	300.29	1.33318	0.0418331	0.0917056	0	0.996519	0	0.163569	0.339508
2226					M447T274	4.56813	↓	0.718911	447.183	1.33304	0.0386131	0.0880512	0	1.001	-1.001	0.21098	0.997507
1284					M282T122_1	2.04056		1.10119	281.655	1.3326	0.114413	0.160006	0	1.001	1.001	0.122109	0.232165
2872			[477][M+1]+		M543T454	7.57136	↓	0.693513	543.324	1.3321	0.013376	0.0488698	0	-1.30828	0	0.228948	1.33644
1311					M287T19	0.318585	↓	0.648474	286.772	1.33168	0.727567	0.439585	0	1.01194	0	0.0415753	0.262123
1979			[284][M]+		M403T236	3.9293		1.04432	403.255	1.33107	0.360868	0.296473	0	0.999589	0	0.0931888	0.417981
1480					M311T373	6.21504	↑	1.31758	311.095	1.33094	0.00655703	0.0336287	0	-0.285706	0	0.253856	0.074806
585					M189T91	1.50958		1.01206	189.039	1.33054	0.302393	0.269245	0	-0.787638	0	0.0617737	0.562624
1489				[M+Na]+ 289.132	M312T207	3.44759	↑	1.29684	312.12	1.32979	0.0885282	0.139685	0	0.820279	0	0.160405	0.420137
290				[M+2H]2+ 287.195	M145T49	0.823606		0.84138	144.605	1.32958	0.681823	0.423657	0	1.001	0	0.0858682	1.16097
1942			[276][M]3+		M396T163_1	2.71082		1.10608	395.899	1.32845	0.0741604	0.12729	0	-0.603854	0	0.15001	0.497631
170					M125T85	1.42273	↑	1.57492	124.591	1.32774	0.191788	0.211684	0	-1.01986	0	0.0640758	0.562658
152					M121T366	6.10654	↑	1.5206	121.015	1.3272	0.0359483	0.0847972	0	0.890472	0	0.184701	1.19805
2206			[327][M+1]3+		M444T172	2.85887		1.19547	443.591	1.32698	0.096806	0.146233	0	-0.99716	0	0.149389	0.293961
2201			[326][M+1]3+		M443T180	3.00492		1.08388	442.575	1.32682	0.0425724	0.092526	0	-0.933837	-1.4165	0.179585	0.846243
1145			[151][M]+		M263T163	2.72435	↑	1.93094	263.142	1.32598	0.0131529	0.0483856	0	-1.07644	0	0.186774	0.0809901
4545					M832T295_10	4.91389		0.821033	832.424	1.32556	0.00130563	0.015112	0	0.706952	0	0.314237	1.93795
2193					M441T231_2	3.85623	↑	1.32184	440.742	1.32476	0.00359776	0.0243665	0	0.831983	0	0.30345	0.255068
498			[69][M+1]+		M176T32	0.540361		1.17971	176.027	1.32416	0.0780057	0.130816	0	-1.04525	0	0.151045	0.0410161
243			[32][M+1]+		M136T359	5.9779	↓	0.623296	136.084	1.32332	0.0275674	0.0729248	0	0.649058	1.001	0.16493	0.0357582
4582					M844T274_2	4.56132	↑	1.37157	843.879	1.32289	0.00842124	0.0382337	0	-1.00553	0	0.272025	0.580705
1443			[189][M+1]2+		M308T50	0.834711	↑	1.22168	307.584	1.32258	0.210127	0.221197	0	1.001	0	0.149923	1.22332
366			[49][M]+	[M+H]+ 155.131 [M+H-H2O]+ 173.141	M156T74	1.24008	↑	1.21444	156.139	1.32064	0.000862417	0.0124898	0	0.396265	1.001	0.275734	0.743961
1751			[238][M]+		M358T95	1.57892	↑	1.23442	358.167	1.31848	0.00473028	0.0282848	0	0	0	0.264115	0.598785
668			[93][M]+	[2M+H]+ 99.0686	M199T99	1.65466	↑	1.41812	199.144	1.31813	0.0820584	0.134361	0	-1.11334	0	0.166751	1.23962
1997			[287][M]3+		M407T223_1	3.72097	↑	1.42334	406.88	1.31678	0.01887	0.0591481	0	-1.001	0	0.170671	0.842547
2404					M480T195	3.25102	↑	1.2882	480.071	1.31626	0.00639169	0.0331984	0	-0.145031	1.67028	0.310526	0.176011
1768			[239][M+1]+		M362T33	0.551279	↑	1.24659	362.065	1.31607	0.0620831	0.115074	0	1.001	0	0.177149	0.388252
2010			[290][M+1]3+		M408T211	3.5145	↓	0.746314	408.048	1.31505	0.132669	0.173572	0	0.840132	1.001	0.125903	0.474451
433					M166T229	3.81471	↓	0.648397	166.05	1.3149	0.0318086	0.0792723	0	1.01552	1.001	0.175524	0.194864
1940			[275][M+1]3+		M395T150	2.50307	↑	1.47052	394.545	1.31347	0.0236815	0.0669103	0	1.02646	0	0.131869	0.7837
1073			[142][M]+		M251T256	4.26449		0.948316	251.185	1.31318	0.28466	0.260431	0	-1.001	0	0.0791902	0.0693969
89					M107T293	4.87556	↓	0.607881	107.049	1.31299	0.0284117	0.0742498	0	-1.05724	1.001	0.165546	0.425569
3053					M562T78	1.30626		1.09954	562.236	1.31289	0.180727	0.205487	0	-1.00096	0	0.142185	1.21545
1965					M401T196	3.25997	↑	1.23425	400.729	1.31272	0.00896848	0.0393986	0	0	1.36637	0.293328	0.667143
2017					M409T47	0.779602		1.16125	409.019	1.31252	0.187081	0.209092	0	-1.01945	0	0.121201	1.34504
4647					M861T271	4.52353	↑	1.42793	861.389	1.31202	0.0255277	0.0696749	0	1.00125	0	0.21974	1.03704
904			[125][M]+	[M+K]+ 192.027	M231T30	0.500734	↑	1.20402	230.99	1.31168	0.123863	0.166779	0	-1.0188	-1.001	0.152473	0.834536
2498			[390][M+1]3+		M493T150_2	2.49853		0.825699	492.937	1.31069	0.451907	0.334739	0	0	-1.001	0.0652119	1.28136
3146			[543][M+1]6+		M580T283_2	4.72025	↑	1.34597	579.965	1.31067	0.0320591	0.0796243	0	-0.861534	0	0.211632	2.45479
370			[49][M+1]+		M157T74	1.23864	↑	1.2434	157.142	1.31033	0.00250419	0.0203562	0	0.39245	0	0.270407	0.845649
2767					M528T460	7.65911	↓	0.781828	528.308	1.30934	0.00838708	0.0381583	0	0.967425	0	0.238309	0.224895
1422					M304T249	4.15409	↑	1.56702	304.212	1.30903	0.0193804	0.0599758	0	0.323856	-1.4146	0.202996	0.438901
3028					M560T290_3	4.82916	↑	1.25648	560.129	1.309	0.000836621	0.0123192	0	-1.00345	0	0.293293	0.367068
2165				[2M+H]+ 218.04	M437T373	6.20983	↑	1.21234	437.087	1.30815	0.090181	0.140984	0	1.04286	-1.001	0.171982	0.144728
1701					M349T23	0.376295		1.13225	349.055	1.30726	0.0950274	0.144775	0	-1.0011	0	0.178576	0.881554
4467					M811T479	7.99027		0.802079	810.991	1.30693	0.0598093	0.112765	0	0	0	0.167264	0.7406
2075			[303][M]3+		M420T172_1	2.86558		1.10489	419.578	1.30663	0.27316	0.254467	0	-1.001	0	0.102458	0.273123
2056					M415T419	6.98574	↓	0.564445	415.175	1.30606	0.11157	0.157865	0	-1.001	0	0.138112	0.383214
1318					M288T75_1	1.24213	↓	0.631085	288.119	1.30491	0.022634	0.0652666	0	-0.933472	0	0.206591	0.864554
2609					M509T81	1.34357	↑	1.45308	509.22	1.30403	0.0390348	0.0885465	0	-1.00085	0.966213	0.176428	0.42159
4830		peak split of M928T287_1	[892][M]2+		M928T287_1	4.77888	↑	1.40571	928.2	1.30372	0.00177544	0.0174323	0	0.347674	-0.720821	0.359807	0.355824
2184					M439T212	3.53112	↓	0.727988	438.725	1.30278	0.313069	0.274342	0	-1.001	0	0.061297	0.288488
151					M121T314	5.23213	↑	1.40067	121.014	1.30271	0.0135965	0.049342	0	-1.21098	1.001	0.199093	1.13566
2016			[292][M+1]3+		M409T192_2	3.1994	↑	1.25347	408.893	1.30247	0.0134418	0.0490114	0	1.00078	-1.41658	0.21784	0.31804
4328			[773][M+2]2+		M773T471_1	7.84547	↓	0.794818	772.966	1.30173	0.00376961	0.0250266	0	0.424436	1.001	0.253885	1.83525
3150			[543][M+5]6+		M581T284_1	4.73072	↑	1.34751	580.633	1.30166	0.0164592	0.0549424	0	0.0828546	-1.001	0.242951	1.75038
2650					M514T201	3.34896		0.857424	513.537	1.30087	0.324034	0.279657	0	0	0	0.111825	0.481606
4815					M924T296_2	4.93515		0.808431	924.359	1.30052	0.0105066	0.0423023	0	-1.001	1.001	0.232686	1.61648
4651					M862T272_2	4.5312	↑	1.42546	862.14	1.2986	0.0262208	0.0707899	0	-1.001	0	0.241222	0.518066
608				[M+H]+ 190.121	M191T300	4.99485	↓	0.646785	191.128	1.29833	0.0469021	0.098034	0	-1.001	0	0.165245	0.520003
156					M122T76	1.25928	↑	3.03649	121.602	1.29821	0.0296584	0.0761488	0	-1.001	0	0.124694	1.14613
2135			[314][M]3+		M431T235_1	3.91136	↑	1.31248	430.559	1.29696	0.048689	0.100226	0	-0.925102	0	0.150967	0.599261
3216			[558][M]3+		M592T289_2	4.82134	↑	1.44385	591.977	1.29692	0.00131183	0.0151468	0	1.81159	1.001	0.301954	0.428356
4261					M760T315_1	5.24906	↓	0.689413	759.66	1.29652	0.000780644	0.0119286	0	-0.264783	0	0.26944	0.625613
710					M205T71	1.18281	↓	0.555647	205.064	1.2959	0.0654008	0.118605	0	0.474362	0	0.110398	0.54272
4324			[773][M]2+		M772T471_1	7.84519	↓	0.796612	771.966	1.29548	0.00502217	0.0291646	0	-1.001	1.001	0.23643	1.45033
1080					M253T33	0.545076		0.998243	253.066	1.29289	0.426228	0.324015	0	-1.001	0	0.0587854	0.274589
369					M157T116	1.94079	↓	0.713265	157.083	1.29221	0.00328129	0.0230934	0	1.001	0.158664	0.285421	0.642956
2244			[338][M]5+		M451T166_1	2.77158		0.886057	450.646	1.2908	0.393425	0.310046	0	-0.230607	0	0.0969551	0.170522
1876	5-adenosyl-L-homocysteine		[261][M]+	[M+H]+ 384.121	M385T74	1.22579		1.1482	385.129	1.28981	0.195831	0.21386	0	-1.001	0	0.0961017	0.989398
1591					M331T150_3	2.50731	↑	1.37088	331.401	1.28868	0.0335307	0.0816447	0	-0.931684	1.001	0.244862	0.135884
1054					M249T456	7.59799	↑	1.2702	249.185	1.28801	0.00445493	0.0274191	0	-1.00993	1.001	0.244444	0.549305
2326			[349][M+1]+		M467T523	8.7106		0.93413	467.333	1.28793	0.00620237	0.032692	0	1.21242	0	0.209307	0.431494
905			[126][M]2+		M231T374	6.22558	↑	1.31974	231.033	1.28783	0.00494627	0.0289302	0	-0.186463	1.001	0.284901	0.0669156
323	Glutamic acid		[45][M]+		M148T21	0.353284	↑	1.29735	148.06	1.28695	0.0314789	0.0788054	0	-0.997691	-1.001	0.258459	0.0791252
831				[M+2H]2+ 440.103	M221T44	0.726662	↑	1.54479	221.059	1.28695	0.000378697	0.0081424	0	1.52227	0.983158	0.337146	0.731628
1134	Succinylcarnitine				M262T41	0.684543	↑	1.36085	262.129	1.28689	0.0051602	0.0296122	0	-1.00142	0	0.224241	0.323202
1946			[276][M+2]3+		M397T163	2.71014		1.10928	396.567	1.28676	0.0649804	0.118163	0	1.00182	0	0.157229	0.283428
1195				[M+Na]+ 246.11	M269T219	3.64527	↓	0.691583	269.099	1.28622	0.0216083	0.0636557	0	-1.0009	0	0.19089	0.66808
2103			[304][M+1]+		M425T428	7.14053	↓	0.731022	425.346	1.28397	0.0594263	0.112368	0	-0.966114	-1.001	0.16763	0.0477704
785					M215T75_1	1.25554	↓	0.79486	215.139	1.28394	0.0044531	0.0274131	0	2.08103	1.001	0.369506	0.891931
1215					M271T250	4.17189	↓	0.654468	271.115	1.28379	0.0295663	0.0760108	0	1.001	0	0.175365	0.414942
129				[M+H+MeCN]+ 76.0309	M118T94	1.56856	↓	0.697681	118.065	1.28348	0.156887	0.190773	0	1.001	0	0.0981405	0.20501
211					M131T34	0.565351	↓	0.794131	131.053	1.28344	0.0096959	0.0408351	0	1.54294	-1.001	0.228821	0.499774
2001			[287][M+1]3+		M407T223_2	3.72097	↑	1.39075	407.214	1.28102	0.00390099	0.025514	0	-1.001	-1.001	0.214913	0.834492
3262			[565][M+1]+		M601T26	0.429079	↑	1.22512	601.185	1.28051	0.108555	0.155539	0	0.572759	0	0.160961	0.633276
2582			[410][M]4+		M505T304_3	5.07194		1.18319	505.035	1.28037	0.00835416	0.0380855	0	0	0	0.23578	1.69276
467					M170T86	1.43994	↑	1.25008	170.154	1.27524	0.00616376	0.0325869	0	-0.196877	1.001	0.268097	0.402204
2931					M549T290	4.83667	↑	1.34313	549.056	1.27523	0.00320327	0.0227901	0	1.1178	0	0.272219	1.83901
3173					M583T398	6.63085	↓	0.589691	583.254	1.27487	0.0184225	0.0584047	0	1.001	0	0.200943	1.43326
2318					M466T91	1.51244	↑	1.3093	466.004	1.27472	0.0111888	0.0438162	0	1.001	1.001	0.216163	0.0120046
607					M191T374	6.23923	↓	0.798864	191.107	1.27254	0.00464879	0.0280338	0	-1.09534	0.433582	0.25733	1.96393
1517			[200][M+1]+		M317T356	5.93108	↑	1.59803	317.252	1.27235	0.00725043	0.035459	0	-0.698554	1.001	0.214607	0.708241
279					M143T91	1.513		1.05314	143.034	1.27195	0.258134	0.246514	0	1.00034	0	0.0837648	0.232563
2312			[347][M]4+		M465T229_3	3.81169	↑	1.23495	465.017	1.27167	0.0215523	0.0635657	0	0	0	0.178543	1.05978
2694				[M+Na]+ 496.151	M519T81	1.34634	↑	1.21911	519.141	1.27145	0.122487	0.165824	0	1.001	0	0.174505	0.468558
64	Methyl methacrylate				M101T88	1.46134	↑	1.48791	101.06	1.27092	0.000162724	0.00483126	0	0.900343	-0.682893	0.445827	0.991276
1581				[M+Na]+ 307.084	M330T27	0.448427	↓	0.718932	330.073	1.27028	0.02204	0.0643422	0	-1.00104	0	0.210533	0.464562
1961			[281][M]+		M400T438	7.30072	↓	0.628673	400.343	1.27025	0.0660569	0.119289	0	-0.745027	0	0.132494	0.630182
2569			[406][M]3+		M504T258_1	4.30404	↑	1.29091	503.615	1.27008	0.0253221	0.0693657	0	1.001	1.001	0.213532	0.385385
1499					M314T156_2	2.60248	↑	1.20305	313.92	1.26779	0.040017	0.0896801	0	0	0	0.147994	0.168525
12			[1][M+1]+		M73T32	0.525965	↓	0.682852	73.084	1.2676	0.0136163	0.0493842	0	-0.999745	0	0.204019	0.0731985
2045					M413T150	2.49428	↑	1.27926	413.499	1.26577	0.0423095	0.0922349	0	0	0	0.216188	0.108484
2389					M479T219_1	3.65472		1.12834	478.771	1.26527	0.129271	0.170948	0	-0.994125	0	0.123636	0.997644
945					M237T131	2.17523	↑	1.63412	237.123	1.26451	0.110606	0.157127	0	-1.001	1.001	0.102559	0.523984
3963					M707T279_2	4.64541	↑	1.33164	707.337	1.26443	0.00157323	0.0165107	0	-1.18628	0.0199165	0.358653	0.387704
1132					M262T139	2.31262		1.08526	262.119	1.2635	0.222124	0.227458	0	0.502408	0	0.151827	0.146165
2783					M530T203	3.38939	↑	1.2121	529.799	1.26153	0.0188656	0.059141	0	1.001	0	0.224775	0.541241
3313			[576][M+2]6+		M608T317_3	5.28783	↑	1.27686	608.168	1.26101	0.00265341	0.0208844	0	-1.11142	0	0.217727	1.75659
2685			[434][M+1]+		M518T80	1.3298		1.18147	518.166	1.26076	0.0678568	0.121138	0	1.39564	-1.001	0.165785	0.108389
4650			[846][M+1]4+		M862T271	4.52005	↑	1.40048	861.89	1.26029	0.0212887	0.0631393	0	0.248697	-1.001	0.23326	0.638226
1803					M367T19	0.315332		1.14048	366.785	1.25924	0.31709	0.276294	0	-0.982673	0	0.133829	0.411966
2990					M556T268_4	4.47463	↑	1.36469	556.124	1.2575	0.00799836	0.0372786	0	-1.001	1.001	0.21562	1.28958
792			[108][M+2]+		M217T32	0.529637	↓	0.642899	217.021	1.25725	0.825837	0.470994	0	1.25117	-1.001	0.0127785	0.788942
4154		isotope of M142T128	[742][M]3+		M742T293_1	4.89128		0.812843	742.163	1.2572	2.16953e-05	0.00176099	0	0.602628	0.404256	0.376957	0.58409
3145			[543][M]6+		M580T283_1	4.72375	↑	1.3604	579.798	1.25683	0.0318391	0.0793154	0	-0.800495	0	0.208814	2.48644
2570			[404][M+1]2+		M504T247	4.11799	↑	1.26548	503.732	1.25671	0.00272219	0.0211167	0	0	1.001	0.315111	0.567871
2039					M413T167_1	2.78399		0.90991	412.711	1.25574	0.540583	0.369052	0	-1.001	1.001	0.0441648	0.182114
2881					M545T283	4.71982	↑	1.28595	545.302	1.25566	0.0179848	0.0576609	0	-1.001	-1.001	0.200442	0.4937
1585					M331T274	4.56157		0.884226	330.671	1.25495	0.148447	0.185061	0	0.919854	0	0.159377	0.590612
2536					M499T228_2	3.79731	↑	1.20652	499.278	1.25487	0.0184014	0.0583692	0	0.999337	0	0.223708	0.682407
4832			[892][M+1]2+		M929T287	4.77791	↑	1.3839	928.699	1.25311	0.000961793	0.0130977	0.0212241	1.30745	-1.001	0.360021	0.165464
2092			[304][M]+		M424T428	7.1345	↓	0.684432	424.342	1.25274	0.0714032	0.124658	0	1.0979	0	0.148141	0.50023
309			[43][M]+		M146T17	0.279205	↑	1.25715	146.166	1.25265	0.406247	0.315426	0	0.73648	0	0.0437265	0.57918
1359					M294T127	2.11587	↑	1.89171	294.145	1.25254	0.0250317	0.0689336	0	-1.03349	0	0.170954	0.373812
1441					M308T113	1.88877	↑	1.25533	307.502	1.25243	0.119007	0.163362	0	1.41059	1.35337	0.104208	0.479618
2295			[345][M+1]3+		M462T172	2.86863		0.989218	461.582	1.25227	0.435942	0.328137	0	-1.001	0	0.0722308	0.602818
1865			[257][M]+	[M+K]+ 342.147	M381T466	7.76304		0.986802	381.11	1.25056	0.259893	0.247466	0	0	0	0.101976	0.533851
3019			[510][M+1]+		M559T454	7.57482	↓	0.79676	559.298	1.24993	0.0105155	0.0423177	0	1.38996	-1.001	0.2144	0.461384
297					M145T407	6.7909	↓	0.786563	145.122	1.2499	0.00747815	0.0360317	0	0.943055	-0.0966384	0.252687	0.300233
3452			[608][M]2+		M627T244_1	4.06903	↓	0.77418	626.804	1.24974	0.817619	0.468503	0	1.001	1.001	0.0220446	0.424747
3126			[540][M]5+		M575T203	3.38929	↓	0.777873	574.503	1.24952	0.976708	0.512906	0	-1.02575	-1.001	0.0389848	0.311127
1117			[144][M+1]4+		M259T146_2	2.43812		1.10283	259.4	1.24922	0.155693	0.189982	0	0	1.001	0.115464	0.278132
2490			[388][M]2+		M492T181_1	3.02065		0.83898	491.751	1.24905	0.598872	0.392336	0	0	0	0.0736389	0.629213
553					M185T22_1	0.363822	↑	1.31039	185.102	1.2487	0.0186683	0.0588151	0	-0.823838	-1.001	0.270931	0.524574
2353			[356][M+1]4+		M472T221_1	3.67599	↑	1.38898	471.518	1.24862	0.0250745	0.068996	0	0	0	0.217255	1.26644
1557					M325T22	0.358971	↑	1.21911	325.113	1.24845	0.0341469	0.0824673	0	0.114037	0	0.220828	0.226119
4670					M870T128	2.13438		1.14196	870.28	1.24826	0.0342299	0.0825772	0	-1.21502	0	0.251333	1.24529
61					M100T99_2	1.65445		1.17785	100.344	1.24808	0.152423	0.187787	0	0.985124	0	0.131203	0.762815
2449			[376][M+1]+		M486T44	0.737657	↓	0.796326	486.096	1.24679	0.0350159	0.083605	0	1.00092	0	0.175853	0.206929
2901					M547T293_2	4.88693	↑	1.21326	547.459	1.24659	0.0197796	0.0606086	0	-1.00075	0	0.196758	0.0603583
2780			[462][M]7+		M529T288_2	4.80691		1.18127	529.429	1.24575	0.0295923	0.0760498	0	1.07199	0	0.156935	0.320274
3855			[676][M+2]+		M690T271_4	4.52052	↑	1.28592	690.111	1.24567	0.0102519	0.0418555	0	0	1.001	0.251123	0.837198
2393					M479T219_2	3.65519		1.10979	479.022	1.24493	0.0974149	0.146727	0	-1.001	0	0.139607	1.03438
1806			[250][M]+		M367T125	2.08929	↓	0.745439	367.15	1.2447	0.678884	0.422602	0	-1.40287	0	0.0470634	1.36643
1373			[179][M+1]+		M295T78	1.29221		0.943969	295.158	1.24466	0.336379	0.285479	0	-1.001	1.001	0.0963935	1.15935
4158			[742][M+1]3+		M742T293_3	4.88533	↓	0.790635	742.497	1.24426	0.000213049	0.00575839	0	1.41573	-1.001	0.341251	0.528682
1010			[135][M]+		M245T223	3.72158		1.11553	245.186	1.24418	0.0917299	0.14218	0	0	1.001	0.117951	0.125444
3326			[580][M]5+		M609T244_1	4.06437		0.897454	608.717	1.24398	0.732024	0.44109	0	1.001	0	0.0662768	0.267985
2916			[491][M]6+		M548T313	5.22238	↑	1.22027	548.465	1.24337	0.0180056	0.0576967	0	0.999905	1.001	0.220557	0.120224
1327			[172][M]3+		M290T118_1	1.96609	↑	1.27867	289.507	1.24277	0.0763473	0.129315	0	-1.001	0	0.138322	0.978338
2246					M451T177_1	2.94861	↑	1.24455	450.913	1.24206	0.0301426	0.0768686	0	0	0	0.179276	0.397846
2924			[491][M+2]6+		M549T313_2	5.22238	↑	1.21616	548.8	1.2413	0.0242676	0.0678014	0	-1.001	1.001	0.211561	0.255843
3149			[543][M+4]6+		M580T284_2	4.72725	↑	1.3402	580.466	1.24126	0.0294356	0.0758144	0	0.523773	-1.001	0.204715	2.28995
1931			[274][M+1]5+		M394T128	2.12517		0.926572	393.82	1.24111	0.366483	0.298896	0	1.00089	0	0.102206	0.309118
2182					M438T481	8.01208		0.853831	438.298	1.24096	0.0678516	0.121132	0	-1.36374	0	0.157844	1.03074
1201					M269T466	7.75974	↑	1.24643	269.209	1.24025	0.00325052	0.0229746	0	1.41704	0	0.252655	0.0194021
1735					M356T56	0.931887		0.849022	356.097	1.23997	0.0837541	0.135795	0	-1.001	1.001	0.177148	0.63384
4856					M946T323_4	5.38854	↓	0.792947	946.438	1.23967	0.00251164	0.0203834	0	1.01402	0	0.251567	1.74397
3333			[580][M+2]5+		M609T244_3	4.06942		0.855309	609.118	1.23959	0.889759	0.489601	0	0.93757	1.001	0.0404315	0.572198
604			[84][M]+		M191T32	0.528269	↑	1.35475	191.049	1.23942	0.183509	0.20708	0	-1.41583	0	0.167932	1.531
692			[97][M]+		M203T107	1.78388	↑	1.34859	203.139	1.23914	0.170399	0.199354	0	1.13646	0	0.070943	0.69683
744					M208T319	5.32163	↑	1.28782	208.134	1.23836	0.0823673	0.134624	0	1.16104	0	0.237329	0.96595
805					M218T77_1	1.27644		0.823081	218.102	1.23811	0.244967	0.239548	0	0.996902	0	0.102987	1.37429
2171			[320][M]3+		M438T163_1	2.71096		1.08404	437.569	1.23766	0.269375	0.2525	0	-0.446168	0	0.0890312	0.505958
1899				[M+Na]+ 365.231	M388T194_1	3.22825	↓	0.751869	388.221	1.23727	0.00478665	0.028456	0	-1.001	1.001	0.308267	1.03458
3035			[516][M]5+		M560T221	3.6824	↑	1.49328	560.491	1.23725	0.101099	0.149653	0	-0.994349	0	0.137618	0.766895
4829					M928T285	4.75677	↑	1.36009	927.95	1.23713	0.00203682	0.0184656	0	-1.46621	0.622163	0.341736	0.40073
1838					M375T149	2.47903	↑	1.27592	375.223	1.23711	0.0751799	0.128241	0	1.001	0	0.155855	0.112994
2115					M428T219_1	3.64872		1.17077	427.64	1.23664	0.0887516	0.139862	0	0	1.001	0.172677	0.163536
2187					M439T151_3	2.52429		1.15292	439.255	1.23595	0.0389481	0.0884452	0	0.999865	1.001	0.176692	0.0744052
3734					M671T293	4.87612	↓	0.756395	670.956	1.2359	0.00248186	0.0202742	0	0.699262	1.28686	0.268441	0.0838831
1255			[167][M]+		M279T221	3.6877	↑	1.59234	279.17	1.23548	0.108365	0.15539	0	-1.001	0	0.126599	1.02355
3148			[543][M+3]6+		M580T283_3	4.72173	↑	1.34842	580.299	1.23534	0.0321788	0.0797918	0	1.0596	0	0.206522	2.32511
306					M146T22	0.360628	↑	1.23927	146.117	1.23494	0.0758421	0.128852	0	1.001	1.001	0.185707	0.373078
1479					M311T38	0.638774	↓	0.658997	311.04	1.2346	0.0788784	0.131594	0	1.001	0.0614297	0.165742	0.678357
3955					M706T239_1	3.99012		0.845271	705.839	1.23445	0.459343	0.337743	0	-1.001	-1.001	0.0858552	0.759505
913			[125][M+1]+		M232T31	0.512595		0.996459	231.993	1.23438	0.424046	0.323078	0	-0.891379	0	0.0571398	0.00600828
1235			[164][M]+		M276T78	1.29857		1.0195	276.144	1.23393	0.247925	0.241034	0	-1.001	1.001	0.106932	1.23001
2185					M439T151_2	2.52429		1.16236	438.92	1.23386	0.0400988	0.0897732	0	-1.00101	0	0.171918	0.173554
2886					M546T283_2	4.71951	↑	1.28799	545.803	1.23273	0.0213834	0.0632931	0	0.95029	0	0.19896	0.469981
2435			[372][M+2]+		M484T511	8.51076		0.828227	484.329	1.23226	0.00921941	0.0399079	0	-0.995571	0	0.21657	0.283127
259					M139T91	1.51611	↑	3.40712	138.594	1.23197	0.0298407	0.0764211	0	-1.001	1.001	0.135539	1.92626
637			[87][M+2]+		M195T33	0.54369	↑	1.29645	195.039	1.23158	0.0150353	0.0522736	0	1.001	0	0.218475	0.373111
828			[117][M+1]2+		M221T92	1.53036		1.16059	220.638	1.23137	0.0601753	0.113142	0	1.001	0	0.129869	0.0159938
3370			[590][M+1]3+		M615T214	3.56581		1.15712	614.682	1.23119	0.937531	0.502675	0	-0.953225	1.001	0.0100127	1.25406
469					M171T19	0.321059	↓	0.772261	170.854	1.23041	0.667934	0.418639	0	0.807105	0	0.0421305	0.038412
91				[M+Na]+ 85.0526	M108T74	1.22964	↓	0.751089	108.042	1.22997	0.00155744	0.0164333	0	1.00005	1.001	0.294208	0.617538
1369				[M+Na]+ 272.126	M295T202	3.36552	↓	0.638164	295.115	1.22966	0.0867697	0.138277	0	-1.001	0	0.147046	0.804526
2211			[330][M]+		M445T144	2.40279	↑	1.2239	445.139	1.22948	0.0446289	0.0951837	0	-1.001	-1.001	0.167443	0.825485
568					M187T78	1.29551		0.96266	187.054	1.22926	0.280821	0.258459	0	1.05769	0	0.0654942	1.47213
1394					M299T192_1	3.20558		0.86902	298.667	1.22911	0.945833	0.504879	0	0	0	0.0158755	0.278623
1930			[274][M]5+		M394T127_1	2.12049		0.936714	393.62	1.22838	0.352885	0.292967	0	1.001	0	0.107887	0.362045
813			[114][M]+	[M+H]+ 218.04	M219T373	6.21558		1.01884	219.049	1.2283	0.0743878	0.127503	0	0.906196	1.001	0.176298	0.961571
426				[M+H+H2O]+ 146.058	M165T392	6.52592	↓	0.795129	165.076	1.22807	0.00119891	0.0144871	0	-1.00125	-1.001	0.232129	0.173386
1669			[228][M+1]+		M344T466	7.76115	↑	1.26497	344.157	1.22773	0.0461632	0.09712	0	1.17079	0	0.180029	0.512552
1159				[M+K]+ 225.882	M265T19	0.311999		1.04671	264.846	1.22763	0.535586	0.367013	0	-1.02424	0	0.0555795	0.440886
4112					M733T286_3	4.76389	↑	1.26088	733.226	1.22714	0.000357595	0.00789434	0	1.20849	0.915657	0.40443	0.141109
1268					M281T75	1.24349	↑	1.33845	280.654	1.22691	0.0420291	0.0919224	0	-1.02912	0	0.167903	0.449395
1505					M315T51	0.845806		1.02355	315.08	1.22516	0.181052	0.205675	0	1.001	0	0.0670494	1.09893
2334					M469T151	2.5211		0.905345	468.924	1.22485	0.431668	0.326334	0	-1.17601	0	0.0547582	1.28176
2705					M520T266	4.43945	↓	0.790828	520.492	1.22421	0.784354	0.458175	0	0.998051	0	0.0240948	0.387508
1839					M376T122	2.03368		1.05687	375.539	1.22418	0.108382	0.155404	0	0	0	0.11245	0.410152
3074					M564T259	4.31122	↑	1.77575	564.303	1.22338	0.0195532	0.0602513	0	0.494936	0	0.264714	0.533402
4492					M820T454	7.56746		0.842263	819.967	1.22268	0.0217559	0.0638918	0	-1.00092	0	0.208694	1.94895
2457					M488T287_1	4.78451		1.19502	487.744	1.22193	0.0180565	0.057784	0	1.001	1.001	0.178768	0.38303
2183					M439T151_1	2.52429		1.16569	438.586	1.22157	0.0383195	0.0877034	0	-0.920954	0	0.173516	0.170128
3284			[573][M+1]2+		M606T166	2.77422		1.04281	605.83	1.22071	0.0454505	0.0962271	0	1.001	0	0.213737	0.0387887
1633			[222][M+1]+		M337T428	7.13664	↓	0.732839	337.231	1.22005	0.0161953	0.0544639	0	1.001	0	0.206319	0.187756
317					M147T17_1	0.276419	↓	0.728366	147.113	1.21875	0.476902	0.344663	0	-1.00108	0	0.0985582	0.524391
4119					M734T229	3.82199	↓	0.784988	734.35	1.21854	0.817387	0.468432	0	1.01131	0	0.00738816	0.605919
2266			[341][M+1]3+		M455T237_1	3.94402	↑	1.42134	454.572	1.21735	0.324897	0.28007	0	-1.00426	0	0.0575065	0.234919
3388			[593][M+3]6+		M618T288_3	4.80691		1.18699	617.834	1.21735	0.0133426	0.0487979	0	1.001	1.001	0.201854	0.557362
3328			[577][M+1]2+		M609T281	4.68933		0.807031	608.805	1.21678	0.050169	0.102026	0	-1.001	0	0.203575	0.266525
2708					M521T265	4.42195		0.81766	520.692	1.21442	0.695487	0.428509	0	1.00101	0	0.0203951	0.270196
3330			[580][M+1]5+		M609T244_2	4.06812		0.88832	608.918	1.21439	0.848484	0.47774	0	1.001	1.001	0.047455	0.379329
1755			[236][M+2]+		M359T22	0.369784	↓	0.529593	359.007	1.21437	0.100382	0.149091	0	1.00445	0	0.135128	0.778043
1493			[196][M+1]+		M312T400	6.67414	↑	1.36237	312.189	1.2133	0.0116665	0.044981	0	-0.975893	-1.001	0.147826	0.381807
260					M139T19	0.316525	↓	0.759607	138.906	1.21257	0.386342	0.307188	0	0.505436	0	0.0923489	0.216141
1436			[189][M]2+		M307T50	0.836727	↑	1.29312	307.084	1.21252	0.202889	0.217549	0	0.122642	0	0.137963	1.5694
360					M155T19	0.323399	↓	0.725829	154.88	1.21139	0.328338	0.281708	0	1.00102	1.001	0.102155	0.231929
1575			[211][M+1]+		M329T99	1.6459		0.869316	329.142	1.20899	0.439302	0.329544	0	-0.838137	0	0.0741182	1.20728
2060					M416T153_2	2.54363	↑	1.21473	415.908	1.20875	0.0156708	0.0534917	0	-1.001	1.001	0.166523	0.108297
4857			[897][M+1]4+		M947T324	5.39582	↓	0.78769	946.5	1.20859	0.00268506	0.0209921	0	-0.610497	1.001	0.246807	1.82321
2186			[323][M+1]+		M439T33	0.548391		1.07431	438.975	1.2085	0.458229	0.337296	0	-1.001	0	0.0569666	0.0229592
603				[M+Na]+ 168.051	M191T20	0.329057	↓	0.726942	191.04	1.20849	0.0103113	0.0419608	0	0.356529	1.001	0.293525	1.30401
348					M152T113	1.87951	↑	2.27108	152.071	1.2084	0.175551	0.202457	0	-1.39178	0	0.118056	0.834873
1891					M387T450	7.49424	↑	1.29034	387.11	1.20831	0.048683	0.100219	0	1.3862	0	0.2294	0.206572
3362					M613T25	0.420334		0.904626	613.16	1.20754	0.397717	0.311753	0	-1.36495	1.001	0.0154986	0.255951
485					M173T286	4.77286	↓	0.729758	173.117	1.20724	0.0297235	0.0762462	0	1.001	0.490126	0.142152	0.435602
2116					M428T219_2	3.64436		1.19071	427.841	1.20696	0.0614061	0.114395	0	-1.001	0	0.195755	0.36316
3337			[580][M+4]5+		M610T244	4.06474		0.888831	609.519	1.20684	0.701761	0.430709	0	-0.947741	0	0.070945	0.283557
1901					M389T75_1	1.2555		0.969227	388.61	1.20543	0.137763	0.177404	0	-1.30665	0	0.143968	0.927918
2929			[491][M+3]6+		M549T313_3	5.22238	↑	1.20581	548.967	1.2042	0.0251646	0.0691272	0	-1.00099	1.36187	0.211808	0.232906
1863					M380T429	7.15336	↓	0.673117	380.256	1.20386	0.0509597	0.10297	0	-1.41897	0	0.164185	0.464024
670			[93][M+1]+		M200T99	1.65403	↑	1.37276	200.147	1.20376	0.0603844	0.113357	0	1.29188	-1.001	0.172134	0.767552
4082					M727T295_2	4.91418	↓	0.731731	726.775	1.20311	0.00538271	0.0303148	0	1.05557	0	0.271347	0.652483
1290					M283T19	0.313283		0.807567	282.823	1.20258	0.722726	0.437942	0	-1.00232	0	0.0180516	0.770413
63					M101T59	0.97561	↑	1.67075	101.023	1.20203	0.0024815	0.0202728	0	0.967058	1.001	0.24066	0.928076
2579					M505T304_1	5.07133		1.17152	504.534	1.20171	0.0336933	0.0818632	0	0.754978	0	0.188389	1.70638
4530					M830T302_6	5.03601	↓	0.786295	830.223	1.20166	0.0154811	0.0531327	0	-0.380319	1.001	0.238428	1.0186
2858					M541T45	0.743412	↑	1.34664	541.081	1.20111	0.118165	0.162757	0	1.001	0	0.153494	0.214073
4644					M861T272_1	4.52797	↑	1.34989	860.888	1.19919	0.0352488	0.0839055	0	-1.001	0	0.218953	0.915503
2203			[327][M]3+		M443T171	2.85826		1.15896	443.257	1.1989	0.0768317	0.129757	0	0	0	0.159394	0.0574108
1123					M260T65	1.07941	↑	1.61404	260.197	1.19889	0.0242892	0.0678338	0	1.04148	0	0.132225	1.36476
2397			[365][M+1]+		M479T453	7.54511	↓	0.732193	479.296	1.19772	0.0256213	0.069815	0	0.997501	-1.001	0.176348	1.07905
104					M113T36	0.603613		0.836747	113.021	1.19739	0.0166021	0.0551985	0	-1.001	-1.001	0.194942	0.725859
3310			[576][M+1]6+		M608T317_2	5.28885	↑	1.26423	608.001	1.19591	0.00244262	0.020128	0	-1.06728	0	0.202899	1.49605
809					M219T61	1.01659	↑	1.4064	218.789	1.19586	0.0705596	0.123835	0	0.629464	-1.001	0.125673	2.15861
2263			[341][M]3+		M454T237	3.94407	↑	1.52708	454.238	1.19582	0.19188	0.211734	0	-1.20308	0	0.0804879	0.114947
3129			[540][M+1]5+		M575T204	3.39708		0.83552	574.704	1.19561	0.709685	0.433464	0	1.001	-1.001	0.0627469	0.419443
1119			[145][M]+	[M+H+H2O]+ 241.142 [M+H]+ 259.153	M260T105	1.75124	↑	1.45379	260.161	1.19544	0.290972	0.263623	0	0.428401	0	0.0611962	0.727368
1035					M247T466	7.76044	↑	1.25142	247.227	1.19536	0.00838315	0.0381497	0	-1.00087	1.001	0.220915	0.551182
2918			[487][M+1]2+		M549T486_1	8.0977	↓	0.663042	548.536	1.19412	0.0267876	0.0716953	0	0	0	0.215747	0.46116
1246					M277T468	7.79442		1.06231	277.18	1.19395	0.0962183	0.145754	0	-1.00055	1.001	0.145984	0.385279
1971					M402T382	6.36762	↑	1.35058	402.248	1.19393	0.0276243	0.0730151	0	1.001	1.001	0.165404	0.675183
2076			[303][M+1]3+		M420T172_2	2.86399		1.08981	419.912	1.19366	0.146469	0.18368	0	1.001	0	0.129507	0.0981648
1829					M373T181	3.02118		0.918577	372.539	1.19331	0.59868	0.39226	0	-1.15845	0	0.0414545	0.176875
959				[M+K]+ 199.879 [M+Na]+ 215.853	M239T19	0.312066		0.951704	238.842	1.19326	0.608523	0.396154	0	1.07653	0	0.0455352	0.459481
1222				[M+Na]+ 249.805	M273T19	0.318853	↓	0.771163	272.795	1.19291	0.923662	0.498949	0	-1.04949	0	0.00550552	0.304957
1344				[M+H]+ 290.246	M291T466	7.7742		1.19418	291.253	1.19289	0.0468744	0.0979999	0	0.970397	0	0.161338	0.981041
3625			[641][M]+		M656T43	0.715224		1.15646	656.139	1.19274	0.0819853	0.134298	0	-0.980654	-1.001	0.184376	0.538996
779					M215T19	0.319767	↓	0.760389	214.836	1.19196	0.880261	0.48692	0	1.0073	0	0.0143055	0.185164
2294			[346][M]4+		M462T214_1	3.56857		1.12673	461.513	1.19154	0.640847	0.408599	0	-1.001	1.001	0.0316491	1.59887
1964			[282][M+1]6+		M401T194	3.23762		1.1933	400.561	1.19139	0.0541607	0.106671	0	-1.001	0	0.227741	0.353416
2136			[314][M+1]3+		M431T235_2	3.91694	↑	1.27358	430.893	1.19125	0.064777	0.117948	0	1.001	0	0.131488	0.0956457
946					M237T109	1.81712	↑	1.53659	237.123	1.19061	0.0982516	0.1474	0	0.977912	0	0.0998042	0.411001
3958					M706T239_2	3.98481		0.842091	706.341	1.1903	0.532653	0.365894	0	-0.979185	0	0.07902	0.708028
3962			[700][M]+		M707T465	7.75512	↓	0.778981	707.283	1.19027	0.556334	0.375385	0	1.10038	0	0.00465522	0.0434905
774			[107][M]2+		M214T22	0.373054	↑	1.34849	214.051	1.18978	0.0225729	0.0651726	0	-1.45057	0	0.259542	0.160896
1101				[M+K]+ 217.851	M257T19	0.314099		0.843	256.814	1.18925	0.966802	0.510359	0	1.001	-1.001	0.00633273	0.367646
314			[41][M+1]+		M147T258	4.29914	↓	0.781547	147.063	1.18914	0.00163133	0.0167882	0	1.41642	-1.001	0.25589	1.55697
1020			[136][M+1]+		M246T190	3.15924		1.1161	246.189	1.18892	0.342154	0.288136	0	-1.09458	0	0.0363904	0.682592
3281			[573][M]2+		M605T167	2.77513		1.0386	605.328	1.18885	0.061068	0.114053	0	0.99959	0	0.199301	0.277898
1634					M338T76	1.27439	↑	1.38933	337.536	1.18764	0.0195699	0.0602779	0	-1.17794	-1.001	0.223004	0.260129
977				[M+H]+ 240.1	M241T357	5.95696	↓	0.565634	241.107	1.18714	0.0261763	0.0707182	0	-1.00102	-1.001	0.197771	0.149722
2189			[324][M]3+		M440T151_1	2.52374		1.13742	439.589	1.18658	0.0542028	0.106719	0	1.001	0	0.1628	0.0526411
2004					M408T247_1	4.1148		0.909176	407.566	1.18638	0.409343	0.316753	0	0	-1.001	0.0959353	0.201251
2420			[372][M]+		M482T510	8.50717		0.862319	482.324	1.18638	0.0863386	0.137927	0	0.698814	-1.001	0.138876	1.09988
707			[98][M+1]+		M204T17	0.275235	↑	1.61818	204.226	1.18631	0.154242	0.189013	0	1.05328	1.001	0.0899844	0.184444
1307					M286T39	0.645689	↑	1.35603	286.096	1.18602	0.0414492	0.0912849	0	1.001	0	0.201639	0.619379
4853			[897][M]4+		M946T324	5.39417		0.808306	946.25	1.18483	0.00678246	0.0342263	0	1.64098	0	0.227501	2.14602
1650					M339T129	2.15355	↑	1.33968	339.191	1.1846	0.0922428	0.142571	0	-0.0293902	0	0.116714	1.51833
2653					M514T392	6.52611	↑	1.27905	514.243	1.18421	0.000553575	0.0100026	0	-1.34499	0	0.27248	1.60722
2474			[384][M]+	[M+H]+ 488.22	M489T506	8.43381		0.84778	489.227	1.18363	0.0126549	0.0472803	0	1.00098	0	0.194673	0.031068
2027			[296][M]7+		M411T205_1	3.41941		0.867208	410.504	1.18356	0.685679	0.425034	0	-1.02777	1.001	0.0604715	0.513299
1730					M355T22	0.37148		0.910498	355.011	1.18343	0.806591	0.465123	0	1.01305	0	0.0362867	0.288864
4279					M763T294	4.8926		0.809011	763.06	1.18321	0.000577662	0.0102277	0	-0.784249	-1.001	0.351192	0.0229193
2067			[300][M]3+		M418T156_1	2.60206		1.10325	417.891	1.18318	0.068031	0.121314	0	0	0	0.144773	0.239876
1019			[135][M+1]+		M246T223	3.72375		1.09913	246.189	1.18304	0.161	0.193455	0	1.001	-1.001	0.0865862	0.411798
2406					M480T194	3.23429		1.18644	480.272	1.18181	0.0213323	0.0632102	0	-0.899557	1.001	0.267388	0.284915
1900				[M+NH4]+ 370.219	M388T194_2	3.23611	↓	0.728156	388.253	1.18175	0.00487485	0.0287199	0	1.001	1.001	0.280074	0.170472
2588			[409][M+1]+		M505T467	7.77876	↓	0.792195	505.312	1.18161	0.0602589	0.113228	0	-1.001	0	0.178107	0.673294
532			[77][M]+	[M+NH4]+ 164.047	M182T60	1.00344	↑	1.2224	182.082	1.18147	0.0170067	0.0559366	0	0.602893	0	0.204964	0.156413
335			[47][M]+	[M+NH4]+ 132.025	M150T38	0.628696		1.10899	150.059	1.1812	0.0839608	0.135968	0	-0.127451	0	0.114179	0.203287
591					M189T108	1.79678	↑	1.33182	189.123	1.1806	0.21444	0.223307	0	0.985216	-1.001	0.072796	0.053101
2902					M548T293_1	4.88998		1.17664	547.626	1.18018	0.0248567	0.0686771	0	1.21162	0	0.164535	0.287875
3417					M622T153_1	2.54617		1.12524	621.857	1.17998	0.0660499	0.119282	0	0	0	0.155238	0.408309
1882			[264][M+1]3+		M386T172_1	2.8653		1.11275	385.557	1.17984	0.0945714	0.144397	0	-1.001	1.001	0.147264	0.516763
3240			[563][M]4+		M599T246_1	4.10642	↑	1.87717	598.571	1.17953	0.0736136	0.126775	0	-1.03507	-1.41705	0.179837	0.365984
4271			[762][M+1]3+		M761T334_1	5.56153		0.876396	760.646	1.17902	0.0264011	0.0710796	0	0.245913	1.27218	0.250239	0.351616
1893					M388T75	1.25588		0.957714	388.109	1.17884	0.148487	0.185089	0	-1.26562	0	0.144438	0.878483
2399					M480T219_1	3.65424		1.11712	479.523	1.17841	0.146897	0.18398	0	0	0	0.117536	1.21604
149					M120T568	9.45886	↑	1.4645	120.102	1.17821	0.0234447	0.0665446	0	0.803767	1.40275	0.209049	0.498385
2003					M408T224	3.74145	↑	1.33086	407.548	1.17812	0.0183195	0.0582311	0	-1.00711	0	0.168797	0.52528
176					M125T109	1.81896		0.808261	125.107	1.17794	0.00417292	0.0264781	0	1.01208	1.001	0.240667	0.214874
1878			[263][M]+		M385T382	6.36799	↑	1.35058	385.222	1.17771	0.0323296	0.0800018	0	-0.319856	0	0.130065	0.56005
918			[125][M+2]+		M233T31	0.510281		0.926048	232.989	1.17769	0.554163	0.374521	0	-1.001	0	0.0314098	0.541848
3668					M660T310_3	5.17313		1.16003	659.839	1.17724	0.0115577	0.0447187	0	0	0	0.219281	0.349383
812			[113][M]+		M219T20	0.333283		0.901325	219.027	1.17676	0.864213	0.482324	0	0	0	0.0358536	0.496519
958					M238T270	4.5027	↑	1.26108	238.144	1.17633	0.128066	0.170003	0	1.001	0	0.115478	0.565707
2390					M479T205_2	3.41919		0.843197	478.921	1.17631	0.834354	0.473551	0	0	0	0.0459095	0.764668
2290					M461T214_1	3.56645		1.07979	461.012	1.17615	0.63178	0.40516	0	0	0	0.0418908	1.48189
1317			[171][M+1]+		M288T174	2.89267	↓	0.669073	288.103	1.17578	0.00794289	0.0371495	0	-0.0880548	0	0.257159	0.651928
1683					M346T429	7.14473	↓	0.647947	346.134	1.17464	0.197781	0.214892	0	0.713692	1.001	0.101381	0.959303
1367					M295T40	0.668352	↓	0.654264	295.066	1.17362	0.106789	0.154149	0	0.838505	1.35807	0.146911	0.351431
3700					M666T268	4.46033	↑	1.73251	666.146	1.1733	0.0254267	0.0695233	0	1.001	0	0.207709	2.00531
154			[20][M]+		M121T95	1.58		0.808903	121.084	1.17325	0.00368779	0.0247156	0	-1.00975	0	0.250529	0.293047
751					M210T224	3.73898	↓	0.763405	210.026	1.17312	0.00518244	0.0296837	-0.0430582	0.984753	1.22978	0.301005	0.0888475
3318					M608T316	5.26505		1.15272	608.332	1.17291	0.0171251	0.0561501	0	0.660881	0	0.213025	0.727611
886					M229T219	3.64786		0.817426	229.107	1.17231	0.251603	0.242931	0	0.258611	0	0.109018	0.558105
2441			[376][M]+		M485T44	0.734052	↓	0.792049	485.093	1.17103	0.295281	0.265768	0	-1.00059	1.001	0.0485629	0.291062
2823			[468][M+1]+		M535T471	7.84808	↓	0.763617	535.298	1.1709	0.00583741	0.0316723	0	1.11758	-0.704804	0.256421	0.327075
3703					M667T268_1	4.4599	↑	1.56325	666.547	1.1702	0.0423232	0.0922501	0	1.03804	0	0.185633	2.57291
1787					M365T100	1.66689	↑	1.2516	364.872	1.16916	0.041422	0.0912549	0	0.522445	0	0.239756	0.543151
793					M217T81	1.34189		1.09652	217.057	1.16888	0.265374	0.250395	0	-1.001	0	0.113024	0.0615495
2361					M473T142_2	2.3738	↑	1.33158	473.239	1.16877	0.0333649	0.0814211	0	1.001	0	0.221877	1.04268
875					M228T155	2.58997	↓	0.70917	228.086	1.16822	0.229624	0.231551	0	-0.654198	0	0.133092	1.44837
468			[67][M+1]2+		M171T74	1.23919	↑	1.3382	170.566	1.16799	0.0550867	0.107707	0	-1.001	-1.001	0.173081	0.205169
41			[6][M]+		M93T22	0.368059	↑	1.27048	93.0549	1.1667	0.0627532	0.115783	0	0.858497	0	0.187903	0.964321
4561					M840T312_2	5.20594	↓	0.796961	840.456	1.1658	0.000395454	0.00833036	0	1.39859	-0.506148	0.345005	0.690595
1684					M346T103	1.71852		1.10644	346.161	1.16546	0.617316	0.399591	0	-1.40741	0	0.0697637	0.212942
3293				[M+H]+ 606.163	M607T24	0.407359		1.18036	607.17	1.16522	0.195439	0.213651	0	-0.879322	0	0.0819503	0.457003
2059			[299][M+1]2+		M416T392_1	6.52572	↑	1.25041	415.641	1.16512	0.0244286	0.0680426	0	0.924618	0	0.220991	1.51651
2071					M419T246	4.10661	↑	1.27365	418.728	1.16503	0.149286	0.185641	0	-0.012618	1.001	0.166857	0.215633
2983					M556T268_1	4.46066	↑	1.51223	555.622	1.16497	0.0437119	0.0940007	0	1.00758	1.41571	0.176007	2.25982
767					M213T19	0.319767		0.926863	212.839	1.1649	0.933675	0.501644	0	1.10684	-1.001	0.00993022	0.0997191
2014			[293][M]2+	[M+2H]2+ 815.402	M409T149_1	2.4854	↑	1.27609	408.708	1.1649	0.0529051	0.105242	0	1.001	-1.001	0.191777	0.507334
124					M117T19	0.312292	↓	0.79427	116.891	1.16414	0.955867	0.507516	0	1.001	-1.001	0.00604982	0.409282
1740			[236][M]+		M357T22	0.370628		0.98792	357.008	1.16386	0.561554	0.377451	0	1.00099	0	0.0410965	0.188504
3059			[522][M]5+		M563T307_1	5.10885	↑	1.21518	562.7	1.16375	0.0166271	0.055243	0	-1.62537	0	0.249895	0.290502
797					M217T413	6.87643		0.815931	217.122	1.16315	0.00468718	0.0281526	0	-1.17679	-0.0179	0.245137	2.22421
1408			[183][M+1]2+		M302T154	2.55925		1.1974	301.664	1.16313	0.0127371	0.0474651	0	0	0	0.179433	0.640103
2373			[360][M]3+		M476T250_1	4.16611		0.942561	475.604	1.16191	0.672262	0.420212	0	1.001	0	0.0447522	0.476317
2384			[364][M]3+		M478T247_1	4.11457	↑	2.029	477.917	1.16188	0.267381	0.251455	0	1.001	0	0.054609	0.485194
643				[M+H]+ 194.115	M195T110	1.82955	↓	0.799944	195.122	1.16184	0.0125519	0.0470473	0	-1.38232	1.001	0.187583	0.0164083
2847					M539T225_2	3.74595	↑	1.47035	538.781	1.16093	0.0246953	0.0684391	0	0	0	0.249904	0.537371
447			[65][M+1]+		M167T335	5.58319	↓	0.743477	167.09	1.16039	0.0453582	0.0961106	0	0.772389	0	0.144782	0.100737
4466			[803][M+3]2+		M809T454_2	7.5715		0.818543	809.467	1.15962	0.0121783	0.0461896	0	1.00064	0	0.223189	0.684661
2799			[464][M+1]5+		M532T206_1	3.42513		1.13907	531.688	1.15926	0.124693	0.167349	0	0.997634	0	0.136751	0.111305
1508					M315T379	6.31397	↓	0.741503	315.157	1.15818	0.0968608	0.146278	0	0.733587	-1.001	0.18873	2.06972
2707			[443][M+1]3+		M521T269_1	4.47666	↑	1.30813	520.6	1.15815	0.0176987	0.0571657	0	1.61122	0	0.183953	0.751795
2394			[366][M+1]3+		M479T205_3	3.42		0.82758	479.088	1.15793	0.831302	0.472638	0	1.01326	0	0.0445233	0.657436
2427			[372][M+1]+		M483T510	8.50535		0.852297	483.327	1.15703	0.0599723	0.112933	0	-0.981187	0	0.15661	1.13337
858				[M+K]+ 185.902 [M+Na]+ 201.876	M225T19	0.312332		0.918351	224.865	1.15654	0.825392	0.47086	0	1.03742	0	0.00856579	0.722736
2153			[317][M]2+		M434T118_1	1.96566		1.14652	433.758	1.15538	0.0355046	0.0842334	0	0	0	0.196468	0.224508
2245			[338][M+1]5+		M451T167	2.77753		0.87009	450.847	1.15481	0.846935	0.477284	0	0	0	0.04674	0.290421
3340					M610T224	3.72511	↑	1.32972	609.817	1.15473	0.130184	0.171658	0	0.706811	1.40117	0.135256	0.514498
1299					M284T169	2.81496		1.05377	283.668	1.15376	0.843621	0.476306	0	-0.977856	0	0.00479718	1.40674
2551			[400][M]3+		M501T221_1	3.68788		0.955946	500.611	1.15322	0.491046	0.350068	0	-1.00103	0	0.0789182	0.453124
1810			[250][M+1]+		M368T125	2.08754		0.838504	368.153	1.15307	0.76769	0.452849	0	0	0	0.0285571	1.12641
1021			[137][M+1]+		M246T177	2.94255	↑	1.30741	246.189	1.15244	0.267355	0.251441	0	0.263256	0	0.0850461	0.0673251
3770			[664][M]+		M676T386	6.4359		0.844701	676.21	1.15176	0.686264	0.425243	0	-1.00176	0	0.0361858	0.102218
1293					M283T67	1.10992	↓	0.736161	283.033	1.15145	0.0207742	0.0622932	0	0.833981	1.001	0.203598	0.111365
3369			[590][M]3+		M614T214	3.56041		1.0263	614.348	1.14917	0.334184	0.284458	0	-1.001	0.788553	0.0642632	0.332971
209					M131T271	4.51091	↓	0.79167	131.049	1.14807	0.0260209	0.0704668	0	0.97358	0	0.16633	2.68169
2292					M461T214_2	3.56691		1.08199	461.263	1.147	0.659104	0.415404	0	0.625799	1.001	0.040094	1.49914
3586					M646T235	3.91947	↑	1.22721	645.838	1.14687	0.25993	0.247486	0	0	0	0.0878677	0.123141
1897					M388T466	7.76778	↑	1.35088	388.212	1.14629	0.276378	0.256148	0	0.9941	-1.001	0.107536	0.311129
849				[M+K]+ 183.905 [M+Na]+ 199.879	M223T19	0.312292		0.922851	222.868	1.14628	0.660714	0.415997	0	0.391365	0	0.0666756	0.161126
4852					M946T323_1	5.38783		0.817553	946.188	1.146	0.0107128	0.0426552	0	1.001	1.001	0.216568	1.72998
1081					M253T121	2.02498	↑	1.21698	253.119	1.14518	0.334901	0.284792	0	-1.001	0	0.0663884	0.0630037
1043				[M+K]+ 209.908 [M+Na]+ 225.882	M249T19	0.308871		1.03268	248.871	1.14503	0.780246	0.456872	0	-1.01129	0	0.0150472	0.786781
2083					M422T93	1.54359	↑	1.27521	422.123	1.14494	0.00635349	0.0330974	0	-0.530264	1.001	0.241026	0.855711
3622					M655T294	4.89421		0.815885	655.254	1.14493	0.012127	0.0460701	0	1.2565	0	0.317332	0.00910719
4751			[869][M+1]5+		M904T300	4.99169		0.814021	903.868	1.14482	0.00158978	0.0165908	0	0.868562	0	0.308599	2.26852
4814			[889][M]3+		M924T295_2	4.91549		0.873765	924.249	1.14467	0.0596469	0.112597	0	-0.517898	-1.001	0.176417	1.61453
3175					M584T246	4.09929	↑	1.27387	583.51	1.14462	0.261984	0.24859	0	-0.845976	0	0.126458	0.479143
1554			[208][M]+		M324T68_2	1.13485		1.19141	324.183	1.14375	0.0230923	0.0659941	0	1.001	0	0.189111	0.724522
2388			[366][M]3+		M479T205_1	3.41604		0.831978	478.754	1.14357	0.935677	0.50218	0	1.001	0	0.0333205	0.550465
2521				[M+H]+ 496.151	M497T81	1.34448	↑	1.25165	497.158	1.14233	0.159798	0.192678	0	1.33686	0	0.181217	0.060905
3708					M667T313_2	5.22015	↑	1.20017	667.025	1.14223	0.0154724	0.0531162	0	0.509459	0	0.237313	0.369017
2070			[300][M+2]3+		M419T156	2.60627		1.1252	418.559	1.14209	0.0915392	0.142034	0	-1.001	1.001	0.153206	0.0504845
662					M199T19	0.316663	↓	0.73989	198.862	1.14163	0.800046	0.463097	0	-0.886431	1.001	0.0265314	0.188282
3908					M696T284_5	4.7295	↑	1.29924	696.359	1.13981	0.039758	0.0893838	0	1.001	1.001	0.187594	1.2681
3084			[528][M+1]+		M567T453	7.55793		0.823527	567.324	1.1395	0.0476094	0.0988978	0	1.40716	0	0.199578	0.169211
2096					M425T99	1.646		1.16225	425.116	1.13889	0.389503	0.308469	0	-1.001	0	0.0963426	0.165484
54					M99T16	0.260825	↓	0.742121	98.9757	1.13884	0.978899	0.513466	0	0.41994	0	0.0486902	0.27831
2046					M414T206	3.4383		1.10672	413.633	1.13821	0.0904048	0.141158	0	1.30723	0	0.173652	0.270645
3218			[558][M+1]3+		M592T290	4.82679	↑	1.3182	592.311	1.13797	0.00162587	0.0167626	0	1.21636	1.1822	0.274084	0.634819
1468					M310T27	0.451108	↓	0.76025	310.089	1.13793	0.864763	0.482483	0	1.001	0	0.00655204	0.906026
4854					M946T323_2	5.39129		0.823571	946.313	1.13773	0.012503	0.0469362	0	1.001	1.001	0.211645	1.84121
1741					M357T52	0.861165		1.19548	357.069	1.13703	0.0218873	0.0641007	0	0.827247	2.26497	0.339401	0.322283
3457			[608][M+1]2+		M627T244_2	4.06696		0.844242	627.305	1.13645	0.821455	0.469669	0	1.0063	1.001	0.0058828	0.346718
1989					M405T167_2	2.78021		1.19288	404.889	1.13591	0.0257376	0.0700055	0	-1.00101	0	0.206592	0.0693627
2386			[365][M]+		M478T453	7.54709	↓	0.747826	478.293	1.13571	0.0389291	0.0884228	0	-0.686763	0	0.168606	0.888451
2818			[469][M+1]4+		M535T219	3.65334		1.08345	534.55	1.13458	0.136618	0.176553	0	-1.00614	0	0.165461	0.0133274
4459			[803][M]2+		M808T454_1	7.57147		0.817308	807.967	1.1333	0.0299479	0.0765803	0	0.979824	0	0.193483	1.90384
1022					M247T19	0.316186		0.80413	246.784	1.13272	0.816413	0.468136	0	-0.720039	0	0.0295287	0.817607
2260			[340][M+1]3+		M454T221	3.68804		1.09222	453.568	1.13175	0.187283	0.209204	0	0	0	0.0885849	0.240454
661					M198T23	0.381129		1.15057	198.209	1.13152	0.0175816	0.0569607	0	-0.979007	0	0.212736	0.345481
588					M189T386	6.42547		0.824954	189.091	1.13122	0.121081	0.164837	0	0.985077	1.001	0.121069	0.683009
1120					M260T73	1.2208		1.15528	260.16	1.13094	0.497979	0.352664	0	0.947679	0	0.0267997	0.723283
3068			[521][M+1]+		M563T511	8.52019		0.818015	563.329	1.13068	0.0604831	0.113458	0	-1.15647	-1.001	0.195879	1.72269
3191			[551][M+1]2+		M587T136	2.27426	↑	1.5209	586.84	1.12922	0.27089	0.25329	0	-1.08879	1.001	0.100225	0.246348
791				[M+Na]+ 193.934	M217T19_2	0.309092		1.16546	216.923	1.1291	0.333176	0.283987	0	1.001	1.001	0.0926377	0.562943
1375					M295T130	2.16837	↑	1.30162	295.165	1.12893	0.320094	0.277757	0	-1.21678	0	0.0790091	0.0567751
2930			[487][M+2]2+		M549T486_2	8.09421	↓	0.605998	549.034	1.12861	0.0870644	0.138515	0	-0.850208	-1.001	0.168481	0.546233
385					M160T100	1.66259	↓	0.744472	160.108	1.12859	0.00787143	0.0369819	0	-1	-1.41656	0.227902	0.470251
2548			[399][M+1]2+		M500T297_4	4.94251		1.11724	500.438	1.12795	0.0880095	0.139273	0	1.001	0	0.116386	0.123605
2094			[305][M]5+		M425T207_1	3.44529		1.11489	424.837	1.1278	0.0983637	0.14749	0	1.001	0	0.141026	0.353439
1778					M363T199_2	3.318	↑	1.91018	363.454	1.12771	0.125946	0.168324	0	-1.001	0	0.0996368	0.475763
377					M159T40	0.661443	↓	0.761933	159.028	1.12767	0.114622	0.160161	0	-0.999897	0	0.142275	0.460737
3636					M657T152	2.52584		0.984084	657.376	1.12747	0.176469	0.203	0	-1.001	0	0.145469	0.0354951
2216					M445T221	3.68761		1.08417	445.49	1.12719	0.095965	0.145547	0	-1.001	0	0.13565	0.901914
3787					M682T359_2	5.9782	↑	1.27295	681.708	1.12712	0.0040539	0.0260633	0	1.3683	1.001	0.285058	0.725164
2215					M445T467	7.78508	↓	0.534026	445.313	1.12644	0.089496	0.140449	0	1.31457	0	0.16297	0.646721
605					M191T82	1.36356	↓	0.791379	191.081	1.12619	0.0511461	0.103191	0	-0.186987	1.001	0.218088	0.803575
2423					M483T232	3.86976		1.05552	482.525	1.12616	0.235784	0.234821	0	-1.37645	0	0.123262	0.0979291
665					M199T49	0.820465	↓	0.766389	199.112	1.12599	0.00664628	0.0338565	0	1.14668	0	0.248998	0.316386
2784			[462][M+3]7+		M530T288_3	4.80691		1.19094	529.859	1.12524	0.038933	0.0884274	0	0	0	0.160645	0.609835
2781			[462][M+1]7+		M530T288_1	4.80691		1.17933	529.573	1.12494	0.0549744	0.107582	0	1.001	0	0.143343	0.844572
2542			[399][M]2+		M500T297_1	4.94222		1.13153	499.937	1.12483	0.0670944	0.12036	0	1.001	0	0.100775	0.0161973
4463			[803][M+2]2+		M809T454_1	7.57329		0.833958	808.967	1.12478	0.0582151	0.111099	0	1.39981	0	0.195999	1.35061
3967			[700][M+1]+		M708T465	7.75352	↓	0.796814	708.287	1.12418	0.0861359	0.137762	0	1.001	0	0.0902693	0.169031
397			[55][M+1]+		M161T22_2	0.372547	↓	0.70244	161.136	1.124	0.356023	0.294354	0	-0.998716	0	0.0752742	0.0490444
2086					M422T190_3	3.16257	↑	1.41533	422.49	1.12389	0.367382	0.29928	0	-1.00142	1.001	0.0564267	0.807016
982					M242T145_1	2.4176		1.00237	241.802	1.12357	0.43422	0.327413	0	-0.609861	0	0.0465314	0.352431
3038			[516][M+1]5+		M561T221	3.67651	↑	1.42855	560.692	1.123	0.123215	0.16633	0	1.1311	-0.506148	0.113295	0.712104
2207					M444T171	2.85101		1.12832	443.925	1.12252	0.0923207	0.14263	0	1.00168	0	0.162805	0.0261718
4828					M928T286	4.76766	↑	1.29182	927.698	1.12162	0.00565115	0.0311284	0	1.27191	-0.0183649	0.311106	0.7101
3453					M627T270_2	4.50365	↑	1.3573	626.841	1.12141	0.0194991	0.0601653	0	-1.22372	0	0.237572	0.411645
1333					M290T270	4.49449	↑	1.5311	290.139	1.11972	0.141244	0.179953	0	0.925132	0	0.129819	1.19619
1552					M324T68_1	1.14088		1.10979	324.129	1.11953	0.271294	0.2535	0	0.988753	1.35973	0.0543012	0.128778
1173			[154][M+1]+		M266T169	2.81951	↑	1.4868	266.158	1.11915	0.186773	0.20892	0	1.001	-1.001	0.0904521	0.0317526
1562			[209][M]+		M327T450	7.49432		0.996597	327.078	1.11895	0.127905	0.169876	0	1.4023	0	0.176684	0.199767
483				[M+Na]+ 150.089	M173T86	1.42569		0.850902	173.078	1.1188	0.00329673	0.0231527	0	-0.993851	1.21447	0.247355	0.714953
1605					M333T521	8.68097		0.80111	333.276	1.11854	0.24205	0.238065	0	1.12787	0	0.0866627	0.450712
2797			[464][M]5+		M531T206	3.4279		1.10413	531.488	1.11803	0.0846105	0.136508	0	0	0	0.153818	0.658371
3775			[664][M+2]+		M678T386	6.43306		0.836935	678.215	1.11763	0.270063	0.25286	0	1.01409	0	0.104106	0.0999029
422				[M+Na]+ 141.941	M165T18	0.302066		0.957511	164.93	1.11748	0.831615	0.472732	0	-0.817779	0	0.0211203	0.806751
2944			[495][M]2+		M550T480	7.99178		0.827597	550.314	1.11703	0.00899965	0.0394627	0	1.0217	1.001	0.216985	1.92318
818					M219T62	1.02573	↑	1.46807	219.134	1.11696	0.163871	0.195291	0	0	0	0.0837494	0.66945
3062			[522][M+1]5+		M563T306	5.10525	↑	1.20764	562.9	1.11684	0.0514584	0.103559	0	0.855105	0	0.200007	1.23474
1739					M357T250_1	4.17015		0.976669	356.955	1.11653	0.295581	0.265916	0	1.00223	0	0.0944441	0.210698
4639					M858T314	5.22508		0.806905	858.215	1.11635	0.00135915	0.0154061	0	-1.00089	0	0.302668	0.714221
922			[128][M]+		M233T109	1.81073	↑	1.38664	233.15	1.1159	0.0393971	0.0889679	0	0.53596	-1.001	0.145908	0.701721
464			[67][M]2+		M170T74	1.22591		1.11792	170.065	1.11461	0.595395	0.390949	0	1.001	0	0.0425607	0.0698763
480					M173T19	0.318975	↓	0.692348	172.852	1.11448	0.245749	0.239943	0	1.00034	1.001	0.0961899	0.188821
1395					M299T192_2	3.20235		0.873834	298.917	1.11382	0.408556	0.316417	0	-1.001	0	0.0475763	0.285472
686			[96][M]+		M203T20	0.339519		0.912263	203.053	1.11345	0.485882	0.348112	0	1.3573	0	0.0887803	0.0662825
2248					M451T80	1.33708	↑	1.27139	451.214	1.1129	0.0445773	0.0951177	0	-0.984471	0	0.201937	0.0350522
3772			[664][M+1]+		M677T386	6.43282		0.837273	677.212	1.11287	0.536855	0.367532	0	0.994364	0	0.0577698	0.158404
2782			[462][M+2]7+		M530T288_2	4.80691		1.17125	529.716	1.11255	0.0613261	0.114314	0	0	0	0.13891	0.766634
2860			[476][M]2+		M541T253	4.22025		0.955797	541.286	1.11252	0.253285	0.243862	0	1.0009	1.001	0.105379	0.359964
72			[9][M]+		M104T20	0.333495		1.12416	104.108	1.11235	0.44683	0.332663	0	1.001	0	0.072868	0.691037
341					M151T94	1.56593	↓	0.766661	151.061	1.11214	0.00463039	0.0279765	0	-1.001	0	0.23235	0.284776
917				[M+K]+ 193.934 [M+Na]+ 209.908	M233T19	0.309144		1.09043	232.897	1.11181	0.456778	0.336712	0	-0.632017	0.160583	0.0569464	0.310508
590					M189T85	1.42088	↑	1.28284	189.123	1.11146	0.468499	0.341381	0	-0.997248	0	0.0942967	0.431562
2387			[364][M+2]3+		M479T247	4.11109	↑	2.61752	478.585	1.11143	0.215392	0.223767	0	1.001	0	0.0605141	0.86371
2514			[393][M+2]+		M496T442	7.36967	↓	0.763656	496.33	1.11123	0.0595102	0.112456	0	-0.69044	0	0.205891	0.352782
505			[69][M+2]+		M177T32	0.541348	↓	0.714716	177.028	1.11072	0.0466924	0.0977758	0	1.001	0	0.166983	0.110099
1135					M262T113	1.87548	↑	1.45829	262.147	1.10992	0.0227585	0.0654655	0	-1.001	0	0.166218	0.839598
1447			[192][M]+		M308T43	0.708699		1.13081	308.092	1.10984	0.184901	0.207869	0	1.001	-1.001	0.148173	1.42678
3013			[510][M]+		M558T454	7.57104	↓	0.766017	558.295	1.1097	0.0910073	0.141624	0	-0.773715	0	0.146843	0.589191
3371					M615T213	3.55233		1.12732	615.016	1.10942	0.940834	0.503554	0	-1.11161	0	0.00971247	1.03155
2674			[433][M]2+		M517T243_1	4.05457		0.901182	516.737	1.10923	0.534015	0.366403	0	0.951971	-1.001	0.082535	0.404193
2367			[359][M]+		M474T225	3.74219	↑	1.27983	474.292	1.10854	0.0224137	0.0649265	0	0.981132	0	0.205002	0.0125669
2251			[339][M]4+		M452T259	4.30919		0.844129	451.502	1.10846	0.782899	0.457715	0	-1.001	-1.001	0.0200931	0.538964
3578					M645T236	3.92794	↑	1.24602	645.336	1.10839	0.321201	0.278293	0	-1.001	0	0.0710947	0.265553
2953			[495][M+2]2+		M551T479_2	7.99132		0.82272	551.314	1.10812	0.00786991	0.0369783	0	1.94127	0	0.241709	2.39952
2948					M551T289_1	4.81098		1.15851	550.79	1.10798	0.0792753	0.131945	0	0	0	0.173233	0.392235
1578			[216][M]3+		M330T146_1	2.43639		0.984261	329.518	1.10705	0.51164	0.357885	0	0	0.501683	0.0530281	0.0633889
452					M168T207	3.44413	↓	0.365016	168.102	1.1067	0.374193	0.302165	0	-1.17482	0	0.0901354	0.386528
2790					M530T475	7.92218		0.984086	530.324	1.10648	0.0751702	0.128232	0	-1.001	0	0.15805	0.265086
1330			[174][M]+		M290T56	0.933317		1.0428	290.135	1.1062	0.215043	0.223598	0	-1.001	0	0.11341	0.132254
2095			[305][M+1]5+		M425T207_2	3.4462		1.12581	425.037	1.10592	0.0770258	0.129933	0	1.04647	0	0.153225	0.529049
829			[113][M+2]+		M221T20	0.332621	↓	0.744769	221.026	1.10568	0.502231	0.354239	0	1.12201	0	0.0531399	0.078151
2315					M466T230	3.82614	↑	1.26515	465.518	1.10552	0.101314	0.14982	0	-0.981433	0	0.138877	0.948005
2398			[366][M+2]3+		M479T205_5	3.41543		0.864106	479.422	1.10502	0.64119	0.408728	0	0	0	0.0434483	0.547852
3965					M708T279	4.64527	↑	1.2911	707.587	1.10446	0.00153501	0.016322	0	0.874152	0	0.331072	0.515544
204					M131T36	0.596059		1.14243	130.602	1.10388	0.473814	0.343463	0	1.67279	-1.001	0.0496535	0.802254
4632					M858T313_1	5.22274		0.834488	857.715	1.1036	0.00132039	0.0151944	0	0.938913	0.872751	0.302042	0.928933
1598					M332T321	5.34886	↑	1.48471	332.243	1.10209	0.041792	0.0916607	0	1.19183	1.001	0.200265	0.0340743
1516			[198][M+2]+		M317T24	0.406544		0.878358	317.084	1.10196	0.290133	0.263203	0	-0.322686	0	0.0437029	0.251801
2154					M434T266	4.43945		0.826059	433.911	1.1012	0.604791	0.394683	0	0	0	0.0384076	0.0823314
446					M167T418	6.97336	↓	0.793306	167.07	1.10095	0.0869139	0.138393	0	-1.001	0	0.132319	0.644
678			[94][M+1]+		M201T23	0.375905	↑	1.42943	201.131	1.10058	0.0759975	0.128995	0	-0.796547	0	0.177741	0.139724
3701					M666T267	4.45807	↑	1.58137	666.346	1.10046	0.0371945	0.0863464	0	1.72517	0	0.191713	2.06084
2525					M497T201	3.34291		0.907418	497.471	1.10037	0.723119	0.438075	0	0	0	0.069673	0.62156
3581					M646T304	5.07182		0.813786	645.578	1.1002	0.00912878	0.0397257	0	0.362107	0	0.278005	0.687903
3755					M673T339	5.65115	↑	1.28144	673.396	1.10017	0.0419198	0.0918001	0	-0.942219	0	0.220708	2.07543
84				[M+Na]+ 83.9617	M107T17	0.288011		0.914768	106.951	1.09966	0.782828	0.457692	0	-0.996931	0	0.0460801	0.2199
2939					M549T314	5.22639		1.17269	549.468	1.09965	0.0153878	0.0529548	0	-1.1727	0	0.222951	0.0637104
2006					M408T247_2	4.11741		0.908674	407.733	1.09952	0.653739	0.41342	0	-1.001	0	0.0620091	0.269108
4573			[829][M+1]3+		M842T322_2	5.37368	↓	0.798409	841.557	1.09951	0.0146016	0.0514161	0	-0.992527	0	0.230373	1.86837
1185					M268T76	1.27111		1.10642	268.104	1.0978	0.197095	0.21453	0	0	0	0.0929072	0.562107
2124			[312][M]3+		M429T155_1	2.58	↑	1.26015	428.581	1.09772	0.0198102	0.0606567	0	0.950209	0	0.223462	0.280867
2778					M529T203	3.38064		1.18338	529.297	1.09747	0.0534771	0.105897	0	1.001	0	0.199364	0.599376
743					M208T113	1.88086		0.812335	208.133	1.09734	0.00631601	0.0329977	0	0.425385	-1.001	0.29608	0.377171
2002					M407T247	4.11945		0.895862	407.398	1.09703	0.745912	0.445729	0	0	0	0.0608927	0.367634
3983			[704][M+1]7+		M710T207_2	3.44884		1.0347	709.937	1.09701	0.77088	0.453877	0	0	0	0.0693875	0.337717
1264					M280T187	3.11405	↓	0.73161	280.154	1.09649	0.0179181	0.0575462	0	0.991333	-1.001	0.258245	1.43604
4831					M928T287_2	4.77856	↑	1.33018	928.449	1.09624	0.00736982	0.0357613	0	1.07332	1.001	0.301022	0.648143
2030			[297][M]5+		M411T202_1	3.36115		0.865657	410.83	1.0961	0.894039	0.490801	0	-1.001	0	0.030516	0.530437
457					M169T99	1.64194	↓	0.775461	169.097	1.09596	0.0104782	0.0422531	0	1.02628	0	0.214148	0.511672
1985					M404T466	7.76195	↑	1.71047	404.206	1.09563	0.170477	0.199402	0	1.00724	0	0.176765	1.45458
215			[28][M]+		M132T22	0.365642		1.06166	132.077	1.09534	0.151506	0.187164	0	-1.05334	0	0.160591	0.838604
2396					M479T219_3	3.65519		1.09365	479.272	1.09534	0.137127	0.176932	0	1.00551	0	0.126561	0.99292
2589					M505T293_3	4.8755		1.17398	505.451	1.09529	0.0509868	0.103002	0	0.0656197	0	0.172098	0.3894
2313					M465T347	5.77735		1.09486	465.189	1.09519	0.551872	0.373606	0	0	1.001	0.0880911	0.794798
1832					M374T56	0.936119		0.911884	374.108	1.09455	0.455635	0.336251	0	1.001	0	0.018402	0.359657
3056			[520][M+1]7+		M562T270_2	4.49726	↑	1.20699	562.44	1.0944	0.048575	0.100086	0	0	0	0.133503	0.577505
3171					M583T246_1	4.0981	↑	1.31212	583.109	1.09424	0.24428	0.2392	0	0	0	0.132237	0.432923
1661					M342T36	0.593286		1.05883	342.085	1.09423	0.364077	0.297862	0	-1.001	1.001	0.0470339	0.884657
2906			[487][M]2+		M548T486	8.09657	↓	0.563331	548.034	1.09402	0.088293	0.139499	0	-0.359486	1.2857	0.168264	1.62792
826			[117][M]2+	[M+2H]2+ 438.258	M220T92	1.52971		1.15026	220.136	1.09375	0.0960326	0.145602	0	-1.001	0	0.108924	0.302044
3088			[530][M]6+		M568T280	4.66558	↑	1.20276	568.485	1.09375	0.0020535	0.0185275	0	-1.001	1.001	0.315661	0.156852
653	Cyclo (Pro-Val)		[92][M]+		M197T159	2.64313	↓	0.701623	197.128	1.09348	0.00815799	0.037645	0	1.09663	1.001	0.230843	0.526392
762					M212T339	5.65746	↑	1.31457	212.02	1.09265	0.0571078	0.109917	0	1.53713	0	0.197809	0.969353
1407			[183][M]2+	[M+2H]2+ 600.311	M301T154	2.55878		1.19092	301.163	1.09203	0.0278441	0.0733626	0	-1.001	-1.001	0.166093	0.323689
2360					M473T60	0.992919	↑	1.24283	473.176	1.09199	0.00972309	0.0408865	0	-0.939382	-1.001	0.323702	0.139429
4858				[M+K]+ 907.596	M947T323	5.39106		0.838016	946.563	1.09191	0.0155891	0.0533375	0	-0.605164	0	0.208212	1.84993
1385			[182][M]+		M297T197	3.27803	↑	1.81533	297.127	1.09184	0.403322	0.314164	0	1.15129	0	0.0367454	0.419674
2296			[346][M+1]4+		M462T214_2	3.56885		1.06709	461.764	1.09157	0.828271	0.471727	0	0.542625	0	0.0129171	1.60178
4612			[837][M+4]5+		M851T298_3	4.96014		0.815524	851.245	1.09055	0.00555382	0.0308376	0	-1.06231	0	0.267212	1.11101
160				[M+K]+ 83.9617	M123T18	0.293155		0.807235	122.925	1.09033	0.55658	0.375482	0	-1.06277	0	0.073902	1.54167
3984			[704][M+2]7+		M710T207_3	3.45064		0.998976	710.08	1.09024	0.968019	0.510674	0	1.03986	0	0.044721	0.416535
1016					M246T103	1.71953	↑	1.29243	246.145	1.08994	0.161052	0.193489	0	-1.2665	0	0.110115	0.431086
1749					M357T250_3	4.16303		0.972738	357.456	1.0893	0.725544	0.4389	0	-0.987137	0	0.0304624	0.301391
1951					M398T192	3.20345		0.8404	397.887	1.08921	0.40885	0.316543	0	0	0	0.0572608	0.300519
2466			[381][M]5+		M489T247_1	4.1126		0.880766	488.677	1.0887	0.767467	0.452777	0	1.001	0	0.0666222	0.618337
403					M163T569	9.48487		1.00605	162.907	1.08868	0.293537	0.264903	0	0.733255	0	0.08182	0.303607
4111					M733T286_2	4.76056	↑	1.20982	733.059	1.08854	0.00256263	0.0205671	0	1.35571	-1.001	0.339069	0.428848
895					M230T373	6.22308	↑	1.26369	230.035	1.08836	0.0383661	0.0877588	0	-0.622726	0	0.196582	0.657552
44					M93T89	1.47707		0.80788	93.0548	1.08825	0.100695	0.149336	0	-0.677089	1.001	0.13334	0.390027
1445					M308T34	0.560682		0.954647	308.02	1.08756	0.610156	0.396795	0	1.0073	0	0.0566224	0.681787
3785					M681T359	5.9773	↑	1.25067	681.374	1.08742	0.0109768	0.0432874	0	-1.00096	1.2973	0.277026	0.557117
4557					M840T312_1	5.20175		0.822143	839.951	1.08708	0.0024131	0.0200164	0	0	0	0.299619	0.343319
4855					M946T323_3	5.3787		0.831809	946.378	1.08663	0.0284505	0.0743099	0	-1.04629	1.001	0.186602	1.81129
2190			[324][M+1]3+		M440T151_2	2.52236		1.15087	439.922	1.08644	0.0139599	0.0501065	0	0.607946	0	0.222625	0.0479697
1984			[285][M]+		M404T392	6.52548	↑	1.20176	404.207	1.0862	0.0309294	0.0780176	0	1.49724	1.41656	0.211058	0.848337
2580					M505T304_2	5.07127		1.15755	504.785	1.08574	0.0394314	0.0890075	0	-1.001	0	0.205886	1.13309
3707					M667T268_3	4.46447	↑	1.56986	666.948	1.08531	0.0366509	0.0856767	0	-1.00069	0	0.201314	1.94226
3123			[538][M]+		M574T280_1	4.6729		0.949441	574.059	1.08502	0.508524	0.356672	0	0	0	0.0615683	0.207103
2048					M414T150_1	2.49428	↑	1.25693	413.75	1.08369	0.060188	0.113155	0	0	0	0.199807	0.124066
2031			[296][M+3]7+		M411T205_4	3.42		0.856163	410.934	1.08359	0.86252	0.481835	0	1.001	0	0.0398565	0.474777
551					M185T86	1.44145		0.873514	185.078	1.08346	0.0817523	0.134099	0	0.232156	0	0.170259	0.812931
801					M217T178	2.96663	↑	1.41479	217.154	1.08318	0.103096	0.151197	0	1.001	0	0.0667928	0.0617322
1503					M314T342	5.70082	↑	1.43702	314.233	1.08314	0.0650661	0.118253	0	1.0068	1.001	0.131419	0.605597
3985			[704][M+3]7+		M710T207_4	3.44786		1.07937	710.223	1.08257	0.772315	0.454338	0	-1.001	0	0.0746464	0.155661
1400					M300T150	2.49448	↓	0.743147	300.066	1.08221	0.013426	0.0489775	0	1.04248	-1.001	0.21398	0.0523101
4839					M933T304_2	5.05942		0.849101	933.35	1.08192	0.000515703	0.00962947	0	1.57272	0.463158	0.354554	0.123686
1253				[M+H]+ 278.151	M279T477	7.94692	↓	0.601489	279.159	1.08051	0.705232	0.431919	0	1.001	0	0.00270606	0.112315
903					M231T114	1.89924	↑	1.26293	230.878	1.08005	0.179719	0.204903	0	-1.001	0	0.0828975	0.2943
2301					M463T289_2	4.81632		1.15499	463.376	1.07947	0.106272	0.153738	0	0	1.001	0.123892	0.875281
4640					M858T313_3	5.22063		0.82974	858.468	1.07891	0.00381321	0.02519	0	-1.001	0	0.271968	0.838454
2771			[459][M+3]5+		M529T231_2	3.84531		1.17856	528.89	1.07861	0.0455535	0.0963569	0	0	0	0.238256	0.419422
1265			[167][M+1]+		M280T221	3.68651	↑	1.67915	280.173	1.07851	0.190166	0.210798	0	-1.0735	0	0.0973275	1.03128
511					M179T42	0.706692	↓	0.411688	179.048	1.07849	0.332233	0.283545	0	1.11415	0	0.0841543	0.763311
2887					M546T302_1	5.03542		1.18285	546.041	1.0783	0.0319091	0.0794139	0	1.00003	-0.484314	0.12267	0.951947
2314			[347][M+1]4+		M465T229_4	3.81417		1.18147	465.267	1.07787	0.0212194	0.0630264	0	-1.00105	0	0.188558	1.07719
3172			[547][M]+		M583T383	6.37679	↓	0.758374	583.255	1.0775	0.0906794	0.141371	0	1.29508	1.001	0.176081	0.539215
1881					M385T513	8.54376	↓	0.642055	385.292	1.07735	0.0167195	0.0554131	0	1.58911	-0.123223	0.235918	0.52921
3807					M685T95	1.58138	↑	1.25779	685.282	1.07729	0.00666154	0.0338951	0	1.64411	-1.28081	0.250462	0.171576
972					M241T119	1.97698	↑	1.22699	240.631	1.07714	0.0380744	0.087411	0	1.001	0	0.174406	0.260017
2981					M555T268_2	4.46452	↑	1.48532	555.455	1.07698	0.0605979	0.113575	0	1.09462	0	0.161208	2.45202
3910			[685][M+1]+		M697T284_1	4.72942	↑	1.33764	696.56	1.07673	0.043233	0.0933765	0	1.00768	1.001	0.190802	2.30901
1009			[134][M+1]2+		M245T154_2	2.57118		1.03573	245.164	1.07667	0.442078	0.3307	0	-1.001	0	0.0935498	0.0769514
4078					M726T272	4.54121		1.17861	726.34	1.07628	0.0359244	0.084767	0	0.983684	-1.001	0.25495	1.75676
408			[59][M]+		M163T466	7.75987		0.954125	163.076	1.07622	0.684909	0.424759	0	-0.0950601	0	0.0653768	0.28791
2152					M434T265_1	4.41465		0.853127	433.743	1.07603	0.739316	0.443536	0	-1.001	0	0.0232334	0.287862
2646			[428][M]4+		M513T201_1	3.35063		0.857014	513.036	1.07543	0.80472	0.464546	0	1.001	0	0.0535924	0.454221
1487					M312T53	0.877735		0.937295	312.112	1.0751	0.57179	0.381457	0	1.00102	0	0.0365484	1.08467
2376			[361][M]3+		M476T236_2	3.93163	↑	1.22066	475.942	1.07478	0.0362226	0.0851424	0	1.00097	0	0.196348	0.691027
2213					M445T175	2.9199		1.14199	445.265	1.07432	0.471186	0.342436	0	-1.02106	0	0.0688646	0.132306
2375			[360][M+1]3+		M476T250_2	4.16731		0.961511	475.939	1.07402	0.681934	0.423696	0	-1.40068	0	0.0511283	0.111105
11					M73T130	2.1639	↑	1.35418	73.0647	1.07396	0.0841242	0.136104	0	-1.001	0	0.114846	0.337531
1272					M281T19	0.311932		0.817392	280.826	1.07378	0.602347	0.393716	0	-1.001	1.33923	0.0400443	1.31973
714					M205T477	7.95175	↓	0.731943	205.086	1.07325	0.638018	0.40753	0	-0.99998	1.001	0.0625003	0.277539
2573			[406][M+1]3+		M504T258_2	4.30805	↑	1.22549	503.949	1.07307	0.0221959	0.064587	0	-1.001	-1.001	0.234838	0.536941
4544			[822][M+4]5+		M832T295_9	4.91035		0.856842	832.324	1.07245	0.0151669	0.0525295	0	0.977682	0	0.23388	1.27682
1698					M348T429	7.1448	↓	0.675232	348.131	1.07238	0.234995	0.234407	0	-1.0112	1.60435	0.0844088	0.905533
425					M165T394	6.57182	↓	0.754934	165.055	1.0718	0.00859922	0.038621	0	-0.959589	-1.001	0.241944	0.683667
2029			[296][M+2]7+		M411T205_3	3.42		0.849491	410.791	1.07134	0.909661	0.49513	0	1.001	0	0.0262755	0.881838
1721					M353T148_1	2.47146		1.18422	352.535	1.07039	0.0999207	0.148728	0	0.96673	-1.33419	0.106153	0.864412
876					M228T82	1.37387	↑	1.51876	228.086	1.0697	0.00395583	0.0257132	0	1.20217	1.78282	0.330024	0.24517
3277			[572][M]+		M604T120	2.00586		0.818175	604.294	1.06955	0.937296	0.502612	0	-1.001	1.001	0.0325356	0.820809
1036					M248T174	2.89294	↓	0.754452	248.092	1.06913	0.00531892	0.0301161	0	-0.194707	-1.001	0.294966	0.343972
1990					M405T152	2.5254	↑	1.24174	404.902	1.06904	0.0694412	0.12273	0	-1.001	0	0.213731	0.891502
398					M162T77	1.27878	↑	1.75054	161.597	1.06826	0.264178	0.24976	0	-1.14605	-1.001	0.0351743	1.41718
1700			[233][M]+	[M+H]+ 348.047	M349T45	0.74538		1.08598	349.055	1.06792	0.642839	0.409349	0	-1.03049	0	0.0553588	0.372888
2733			[444][M+3]+		M523T454	7.56817	↓	0.778791	523.348	1.06733	0.0516733	0.103812	0	0	0	0.176657	1.16075
967					M239T169	2.82103	↓	0.759884	239.139	1.06595	0.00572629	0.0313498	0	0	1.001	0.261703	0.458823
3597			[635][M+1]2+		M649T223	3.7158		0.846178	648.872	1.06578	0.529578	0.36474	0	0	0	0.0337849	0.464953
2339					M469T540	9.00205	↓	0.784816	469.313	1.06568	0.107031	0.15434	0	-1.001	-1.001	0.139514	0.122844
1811			[251][M]+		M368T144	2.39722	↑	1.25179	368.229	1.06547	0.227166	0.230224	0	-1.001	0	0.0713486	0.688253
1029					M247T47	0.777371	↑	1.21687	247.129	1.06536	0.235754	0.234805	0	1.001	0	0.12916	0.569694
2047					M414T167	2.77837		0.884481	413.713	1.0651	0.805799	0.464879	0	-1.06568	1.001	0.0405969	0.304771
910			[127][M]+		M231T141	2.34568		1.19624	231.171	1.0647	0.0534523	0.105868	0	1.0155	0	0.147181	0.723121
3128					M575T280_1	4.67296		0.95288	574.561	1.06332	0.564941	0.378783	0	0	0	0.0540252	0.0260819
2659					M515T300	4.99169		1.19891	514.628	1.06306	0.0348435	0.0833813	0	0	0	0.19515	0.143437
2717			[447][M]7+		M522T273_1	4.54274		0.807631	522.275	1.06305	0.0128989	0.0478262	0	1.001	0	0.222782	0.455091
1174				[M+K]+ 227.88	M267T19	0.309761		1.14468	266.844	1.06256	0.268944	0.252275	0	-0.426083	0	0.106165	0.800477
2591			[411][M+1]2+		M506T293	4.88171		1.17015	505.618	1.06233	0.0397138	0.089333	0	-1.22541	0	0.194077	0.515291
2812			[467][M]+		M534T506	8.4339		0.822517	534.285	1.06179	0.33649	0.28553	0	-0.953617	0	0.0842978	0.276582
3638					M658T152_1	2.52643		0.98445	657.877	1.06089	0.203927	0.218081	0	1.001	0	0.136924	0.00882295
1473			[195][M]+		M310T445	7.41288		0.836156	310.157	1.06053	0.759455	0.450178	0	1.61568	0	0.0311502	0.948647
4665					M870T284_1	4.7329	↑	1.38574	869.699	1.06046	0.146001	0.183351	0	-1.001	0	0.140624	2.14268
46			[6][M+1]+		M94T22	0.363906		1.19453	94.058	1.06019	0.0726168	0.125828	0	-0.779893	1.001	0.210367	0.434687
3189			[551][M]2+		M586T137	2.27584	↑	1.49817	586.338	1.05987	0.308755	0.272301	0	-1.001	0	0.0942657	0.436062
2319			[348][M]5+		M466T238_1	3.96344		0.83616	466.06	1.05965	0.321277	0.278329	0	1.001	1.001	0.0735637	0.359026
4388			[787][M+1]7+		M787T305_2	5.07847	↓	0.792016	786.687	1.05934	0.00235013	0.0197732	0	1.02295	1.38943	0.308884	0.652078
4344					M775T75	1.25087		0.996051	775.213	1.0593	0.28621	0.261221	0	-1.00987	0	0.120852	0.623699
382			[53][M]+		M160T82	1.363	↓	0.723268	160.076	1.05917	0.0735583	0.126723	0	-0.47483	0	0.145798	0.754767
2853					M540T403	6.71666	↓	0.793481	540.366	1.05898	0.00153296	0.0163117	0	0.615861	1.74356	0.30338	0.389865
3017					M559T79	1.31236	↓	0.736687	559.15	1.05792	0.00183083	0.0176645	0	1.04608	-1.001	0.213654	0.245123
3208			[556][M+1]6+		M591T316_2	5.26462		1.16807	591.159	1.05763	0.00806943	0.0374426	0	1.06782	0	0.239738	1.08739
4723					M891T323_4	5.38657		0.818238	890.824	1.05758	0.0124392	0.0467907	0	-1.001	0	0.206254	1.99731
592					M189T47	0.784829	↑	1.37715	189.123	1.0575	0.475664	0.344183	0	-0.79307	0	0.037758	0.187057
1431					M306T105	1.74616		0.814656	306.161	1.05733	0.355862	0.294283	0	-1.00429	0	0.0401704	0.559901
391			[53][M+1]+		M161T82	1.36305	↓	0.797553	161.079	1.05718	0.0158538	0.0538342	0	0	0	0.18955	0.91566
3441			[605][M+1]6+		M625T319	5.32317	↑	1.25048	624.678	1.05686	0.0348604	0.0834033	0	0.392392	1.001	0.194596	0.527132
2863			[476][M+1]2+		M542T253_1	4.22065		0.935174	541.787	1.05644	0.483183	0.347081	0	1.001	0	0.0693153	0.148574
2775					M529T231_3	3.85602	↑	1.32729	529.229	1.0554	0.00825251	0.0378586	0	-0.642326	0	0.207714	0.180273
3223					M595T294_1	4.89694		1.12808	594.657	1.05537	0.0604816	0.113456	0	0	0	0.160891	0.182887
1921					M392T136	2.27493		1.03661	391.561	1.05524	0.525377	0.363153	0	1.01052	0	0.0583978	0.653192
4817			[887][M+2]3+		M924T294_4	4.90757		0.890573	924.473	1.05519	0.0651225	0.118313	0	0	-1.001	0.172204	1.59246
3710					M667T313_3	5.22048		1.18154	667.192	1.05461	0.0793403	0.132002	0	-1.28753	-1.001	0.21767	0.248517
1779					M364T199	3.32011	↑	2.1077	363.705	1.05448	0.053755	0.106212	0	0	0	0.120337	0.891158
2118					M428T23	0.38741		1.04314	428.036	1.05441	0.199137	0.215605	0	0	1.001	0.123876	0.300635
2732					M523T172_2	2.86133		1.17918	523.293	1.05409	0.0378793	0.0871771	0	1.001	0	0.197093	0.741621
4326			[773][M+1]2+		M772T471_2	7.84528		0.855098	772.467	1.05406	0.0218032	0.063967	0	-0.956418	0	0.182663	1.52579
223			[28][M+1]+		M133T22	0.362415		1.10318	133.079	1.05373	0.216341	0.224223	0	0.994881	0	0.127313	0.084261
2139					M431T226	3.76466	↑	1.35431	431.225	1.05329	0.0320822	0.0796566	0	1.001	1.001	0.219489	1.14035
1439			[187][M+1]+		M307T163	2.72098	↑	1.3464	307.137	1.05314	0.0281255	0.0738041	0	-1.12729	-1.29912	0.215439	1.02108
285			[38][M]+		M144T165	2.75756	↓	0.671443	144.081	1.05309	0.239382	0.236694	0	-1.001	0	0.109247	0.63771
4257					M759T490	8.16788		0.811492	758.571	1.0528	0.17619	0.202836	0	1.00102	0	0.0975501	1.72241
997					M243T112	1.85933	↑	1.35179	243.134	1.05273	0.222316	0.227564	0	-0.925575	0	0.0848188	0.792802
239	Homocysteine				M136T23_2	0.380628	↓	0.760104	136.042	1.05259	0.050885	0.102881	0	0.970994	-1.001	0.195533	0.581941
3596			[635][M]2+		M648T223	3.72095		0.840317	648.37	1.05232	0.618124	0.399905	0	1.001	0	0.00499301	0.62364
679			[93][M+2]+		M201T99	1.65265		0.826266	201.149	1.0521	0.18742	0.209281	0	1.0044	0	0.119988	1.00142
273					M141T23	0.378028		0.86818	141.066	1.05206	0.336918	0.285728	0	0.312186	0	0.111023	0.084956
2545					M500T297_2	4.94251		1.14561	500.104	1.05188	0.149815	0.186006	0	-1.007	0	0.103984	0.384543
1906			[268][M]2+		M389T75_2	1.25583		0.99406	389.109	1.05176	0.207359	0.219817	0	-1.01333	0	0.125188	0.936527
1049					M249T103	1.7111	↑	1.59925	249.127	1.05155	0.390422	0.30884	0	-0.660005	0	0.0535057	0.296093
3224					M595T294_2	4.89346		1.10097	594.824	1.05121	0.12329	0.166382	0	-1.001	0	0.121902	0.158103
220					M132T69_3	1.14663	↑	1.42428	132.481	1.05034	0.0817365	0.134085	0	0	0	0.160035	0.0572612
4585			[831][M+1]+		M844T274_4	4.56119	↑	1.31388	844.379	1.04971	0.0240684	0.0675007	0	0.678185	1.001	0.248842	0.239768
916			[127][M+1]+		M232T141	2.343	↑	1.35844	232.174	1.04943	0.218536	0.225454	0	0	0	0.0632902	0.279611
4168			[743][M+5]5+		M743T284_5	4.7399	↑	1.29974	743.36	1.04891	0.0139467	0.050079	0	1.10095	0	0.267556	0.383003
4782			[879][M+1]2+		M917T305_2	5.0843		0.8304	917.299	1.04853	0.000151215	0.00468653	0	-0.519704	-1.001	0.302224	1.43256
1909			[268][M+1]2+		M390T75	1.2539		0.974582	389.61	1.04791	0.265899	0.250673	0	-1.001	0	0.111058	0.605058
3421					M622T153_2	2.54305		1.07729	622.358	1.04768	0.170186	0.199223	0	1.36072	0	0.121451	0.330092
316	*Glutamine				M147T21	0.352932	↑	1.28142	147.076	1.04727	0.0727217	0.125928	0	-0.947968	-1.001	0.175713	0.443901
1353					M293T468	7.7948	↑	1.21746	293.175	1.04686	0.078858	0.131576	0	-1.2817	0	0.0990539	0.329371
882					M229T19	0.319174	↓	0.775245	228.813	1.04667	0.966466	0.510272	0	-1.001	0	0.0198535	0.00375526
28			[3][M+1]+		M87T74	1.22521		0.827571	87.0633	1.04658	0.212046	0.222141	0	1.00177	0	0.0563725	0.412374
2120					M428T31	0.519958		1.1535	428.036	1.04641	0.133893	0.174504	0	-1.001	0	0.130546	0.424264
902					M231T19	0.318975		0.840548	230.81	1.0463	0.819683	0.469131	0	1.00181	1.001	0.0269544	0.246288
3524					M638T307_2	5.11124		1.1022	637.83	1.04589	0.0594015	0.112343	0	-1.43106	0	0.162144	0.764815
3178			[547][M+1]+		M584T383	6.37712	↓	0.772222	584.257	1.04564	0.0763096	0.129281	0	-1.09485	-1.001	0.175646	0.18783
308					M146T224	3.72894	↓	0.773545	146.117	1.04562	0.0728268	0.126028	0	1.00099	0	0.180488	0.842497
1992			[285][M+1]+		M405T392	6.52544		1.17889	405.21	1.04548	0.0875961	0.138942	0	-1.08508	-1.001	0.23228	2.21785
1804	Unknown	reported	[247][M+2]+		M367T466	7.75857		1.10557	367.142	1.04544	0.0691243	0.122414	0	0	0	0.145314	0.566571
1952					M398T68	1.13326	↑	1.35387	398.164	1.04502	0.0560635	0.108784	0	-1.37736	1.001	0.186885	1.39812
2302					M464T288	4.80691		1.14383	463.501	1.04463	0.122802	0.166043	0	1.01051	0	0.118147	0.96976
3334					M609T207	3.44932		0.820829	609.288	1.04461	0.103825	0.151769	0	1.00065	1.001	0.119735	1.16605
1673			[229][M]2+		M345T172_1	2.86989	↑	1.69099	344.692	1.04314	0.174357	0.201745	0	-1.001	0	0.0867534	0.399388
1968					M401T467	7.78655	↓	0.552324	401.287	1.04292	0.409636	0.316878	0	0.958658	0	0.0854604	0.355549
1624				[M+NH4]+ 318.276	M336T513	8.54988		1.14886	336.31	1.04257	0.0141926	0.0505873	0	-1.01619	0	0.24143	0.607784
3856					M690T272	4.52797	↑	1.23908	690.311	1.04241	0.0162679	0.0545963	0	0	1.001	0.233376	0.865562
4811					M924T296_1	4.93054		0.897598	923.914	1.04216	0.0780574	0.130862	0	0.943066	0	0.17276	1.2287
2104					M425T207_4	3.45282		1.12594	425.438	1.0421	0.0914546	0.141969	0	-1.02912	-1.001	0.166524	0.223888
322					M148T86	1.43487		0.804866	148.039	1.04201	0.0212098	0.0630107	0	0.222193	1.001	0.242069	1.10802
2777			[461][M]+		M529T288_1	4.80691		1.15485	529.286	1.04196	0.0705633	0.123839	0	-0.996603	0	0.128774	0.732994
556			[79][M]2+		M185T144	2.3929	↑	1.36581	185.119	1.04163	0.0717322	0.124977	0	0.0609876	0	0.116073	0.425032
158			[20][M+1]+		M122T95	1.57808	↓	0.716664	122.087	1.0415	0.0760235	0.129019	0	-1.00665	1.001	0.140589	0.449267
2949			[495][M+1]2+		M551T479_1	7.99037		0.829747	550.816	1.04137	0.013563	0.0492706	0	0.999772	0.916264	0.214755	2.15985
822			[113][M+1]+		M220T20	0.332447	↓	0.773815	220.03	1.04114	0.58949	0.388578	0	0.979064	0	0.0520839	0.424565
2156					M434T265_2	4.4118		0.831949	434.077	1.04086	0.41532	0.319289	0	-0.586253	0	0.0689408	0.243796
3535					M639T296_1	4.93932		0.861222	638.555	1.04073	0.00231016	0.0196153	0	0.995461	1.09002	0.336174	0.706832
3704					M667T268_2	4.46087	↑	1.5752	666.747	1.0405	0.0562799	0.10902	0	-1.00103	0	0.169612	2.17583
4608			[837][M+1]5+		M851T298_1	4.95845		0.810861	850.644	1.04039	0.0089847	0.039432	0	0.159744	0	0.251609	1.19819
2015				[M+Na]+ 385.78	M409T19	0.312621		1.16798	408.769	1.04035	0.587493	0.387772	0	-1.01357	0	0.00995536	0.469841
3335			[580][M+3]5+		M609T244_4	4.06399		0.939072	609.319	1.04022	0.889385	0.489496	0	0	0	0.0355255	0.0103847
3427					M623T153	2.5425		1.1245	622.859	1.04003	0.0797249	0.13234	0	0.963127	0	0.152718	0.327963
4818			[889][M+1]3+		M925T295	4.90892		0.883204	924.583	1.03958	0.0143557	0.0509202	0	-0.970506	0	0.208503	0.829047
962					M239T322	5.36268		0.82318	239.092	1.03956	0.23043	0.231984	0	-1.001	0	0.107188	0.729602
2066					M417T181	3.00931	↑	1.24474	417.217	1.03936	0.0373792	0.0865719	0	0.351335	0	0.177425	0.329062
4514					M827T273	4.55277		0.821832	827.383	1.03924	0.594255	0.390493	0	1.001	1.001	0.0231169	0.66607
2903					M548T293_2	4.88998		1.15076	547.792	1.03878	0.0803574	0.132894	0	-0.911333	0	0.133912	0.379822
4809			[887][M]3+		M924T295_1	4.91066		0.876755	923.804	1.03875	0.0436842	0.0939648	0	0.781653	1.02878	0.185566	2.04819
706			[97][M+1]+		M204T107	1.78684	↑	1.80124	204.142	1.03725	0.197806	0.214906	0	0	1.001	0.0580758	0.52511
554				[M+Na]+ 162.125	M185T268	4.46814	↑	1.39493	185.115	1.03698	0.282677	0.259416	0	0.995617	0	0.0954737	1.30794
4636					M858T313_2	5.22486		0.820044	857.965	1.03688	0.00430891	0.026939	0	0	0	0.265899	0.460492
2647			[428][M+1]4+		M513T201_2	3.35657		0.832956	513.287	1.03657	0.530987	0.365269	0	1.001	0	0.012771	0.301132
4461			[803][M+1]2+		M808T454_2	7.57177		0.879114	808.468	1.03652	0.0911962	0.14177	0	-1.001	0.592846	0.162663	1.50796
1632			[223][M+1]2+		M337T511_2	8.52124	↓	0.743703	337.173	1.0364	0.0449345	0.0955736	0	-1.001	-0.0415766	0.168342	1.33527
2042					M413T167_2	2.78298		0.905682	413.212	1.03625	0.97727	0.51305	0	-0.999985	0	0.00137459	0.389935
3981			[704][M]7+		M710T207_1	3.44759		1.0453	709.793	1.0361	0.877733	0.486202	0	0.987174	0	0.0580006	0.379676
1176					M267T67	1.11051		0.855551	267.059	1.03595	0.0208811	0.0624706	0	-1.02993	0	0.188944	0.48632
3124					M574T280_2	4.67357		0.925111	574.31	1.03548	0.758718	0.449938	0	0	0	0.0302364	0.00967713
1638			[225][M]+		M338T41	0.675595		0.975364	338.102	1.03543	0.378636	0.30402	0	1.001	0	0.0542786	1.17744
421			[61][M+1]+		M164T268	4.46914	↑	1.87612	164.136	1.03514	0.302425	0.269261	0	1.0803	0	0.12216	0.459795
4720					M891T323_2	5.38386		0.827063	890.649	1.03499	0.0270155	0.0720549	0	-1.001	0	0.182996	1.83964
3325			[578][M+1]3+		M609T264	4.40241		0.862369	608.679	1.03497	0.85781	0.480468	0	0	1.001	0.00920989	0.0398442
1285					M282T122_2	2.04067		1.0255	281.905	1.03492	0.334492	0.284601	0	-1.001	0	0.0665567	0.0768851
2130					M429T513	8.54168	↓	0.677161	429.318	1.03476	0.0472223	0.0984264	0	-1.00121	0	0.171717	0.313991
2303					M464T289_1	4.81203		1.14682	463.627	1.03403	0.101555	0.150007	0	-1.16055	0	0.119864	0.449267
1840					M376T105	1.74792	↑	1.30159	375.606	1.03391	0.0170874	0.0560822	0	-1.12007	0	0.242748	0.154542
4524			[820][M]5+		M830T302_1	5.03028		0.818652	829.722	1.03308	0.0264599	0.0711738	0	-1.48141	-1.31842	0.220685	0.282873
1855					M378T451	7.52352	↑	1.26761	378.321	1.03289	0.0369245	0.086015	0	0.774731	0	0.183639	0.338319
2821					M535T169_2	2.8181		0.872872	535.244	1.03201	0.904651	0.49375	0	-1.00137	1.001	0.0176906	0.551869
3246					M599T292_3	4.86542	↑	1.2289	598.979	1.032	0.0048943	0.0287775	0	0.808651	0	0.30124	0.190546
1807				[M+H-H2O]+ 384.215	M367T382	6.35922		0.81117	367.212	1.03118	0.895087	0.491093	0	1.18343	0	0.0338078	0.331291
1205			[156][M+3]2+		M270T392	6.52586		1.19258	269.577	1.03111	0.0070298	0.0348874	0	1.08102	1.001	0.259252	0.656024
3490					M631T307_2	5.11556		1.14501	631.332	1.03073	0.01048	0.0422563	0	1.001	0	0.227011	0.736414
3711					M667T313_4	5.21983		1.16386	667.359	1.03024	0.0527676	0.105084	0	-1.001	0	0.230754	0.71648
1718					M352T254	4.24161	↑	1.20105	352.165	1.03021	0.101374	0.149867	0	1.001	0	0.106453	0.216964
495					M175T49	0.8238	↑	1.40682	175.108	1.03009	0.621621	0.40126	0	1.4112	0	0.0443181	0.019414
2468			[381][M+1]5+		M489T247_2	4.1148		0.860646	488.878	1.0293	0.817143	0.468358	0	0	1.001	0.0195183	0.0827817
3211			[556][M+3]6+		M591T316_4	5.26454		1.1596	591.493	1.02838	0.0045548	0.0277389	0	-1.00115	0	0.239323	0.467869
1187					M268T133	2.21409	↑	1.7015	268.137	1.02835	0.117187	0.162048	0	0	1.001	0.0901123	0.57952
3404			[598][M]3+		M619T229_1	3.81072		1.18101	619.019	1.02815	0.159728	0.192632	0	-1.001	0	0.129787	0.673321
1470					M310T99	1.64859		0.879041	310.129	1.02778	0.747961	0.446407	0	0	0	0.0338782	0.955734
1668					M344T69	1.15651	↓	0.753821	344.134	1.02742	0.983895	0.514738	0	1.001	0	0.0125547	0.566239
390					M161T91	1.51671		1.15486	161.044	1.0272	0.168429	0.198143	0	-1.001	0	0.111766	0.579171
4224					M755T295_3	4.92475		0.84003	754.839	1.02675	0.0272842	0.0724757	0	-0.999896	0	0.252554	2.25247
1563					M327T490	8.16257	↓	0.717873	327.251	1.02658	0.388599	0.308104	0	-1.1861	0	0.07338	0.75721
1097					M256T184	3.07086	↑	1.21186	255.655	1.02655	0.358141	0.295284	0	0	0	0.0357408	0.0511292
1171					M266T40	0.666166	↑	1.23979	266.088	1.02595	0.0981698	0.147334	0	1.001	0	0.194332	0.841857
2986					M556T268_3	4.46431	↑	1.45029	555.956	1.02569	0.0354439	0.0841558	0	-0.415782	-0.540885	0.180416	1.91062
1298					M284T248	4.14129		0.890961	283.659	1.02561	0.403147	0.314089	0	-1.001	0	0.0798266	0.288125
1191					M269T179	2.97765	↑	1.23515	268.662	1.0254	0.237076	0.235496	0	1.001	0	0.0894411	1.51737
790					M217T19_1	0.318364		0.826472	216.833	1.02523	0.961072	0.508874	0	-0.96735	0	0.0351183	0.505393
4156			[743][M]5+		M742T285	4.74325	↑	1.28671	742.358	1.02509	0.0234281	0.0665188	0	1.24949	0	0.252083	0.571406
4643					M861T305	5.08758	↓	0.791709	860.604	1.02508	0.0027583	0.021236	0	-0.0674786	0	0.267956	1.3537
1957			[280][M]2+		M399T146	2.42823		0.969328	398.719	1.02507	0.447824	0.333071	0	-1.00187	0	0.057279	0.344161
1374					M295T163	2.71957	↑	1.64468	295.165	1.02503	0.188533	0.209898	0	0.433753	-1.001	0.0512739	0.121314
1213					M271T80	1.34158	↓	0.788609	271.065	1.02491	0.83306	0.473165	0	-1.30246	0	0.030592	0.542075
1100					M256T537	8.95054	↓	0.738704	256.263	1.02391	0.058911	0.111831	0	-1.001	0	0.177219	0.447606
1341			[174][M+1]+		M291T56	0.928378		0.801754	291.137	1.02388	0.2234	0.228163	0	-1.001	0	0.135393	0.925555
3549				[M+NH4]+ 621.831	M640T295_1	4.92273		0.863071	639.863	1.02387	0.0101924	0.0417493	0	0.940245	0	0.229376	1.75741
1824					M372T191	3.18919	↑	1.23848	371.679	1.02379	0.17912	0.204556	0	-1.001	0	0.171649	0.0755217
694					M203T83	1.38421		1.186	203.139	1.02319	0.402605	0.313854	0	-1.001	0	0.0656346	0.0389654
2267			[341][M+2]3+		M455T237_2	3.94402	↑	1.40244	454.906	1.02247	0.391808	0.309398	0	1.00086	-1.001	0.0436975	0.379543
2543					M500T228_2	3.79758		1.17638	499.946	1.02214	0.0336018	0.0817403	0	1.24695	0	0.202636	1.16
1645					M339T177_2	2.94909	↑	1.26496	338.938	1.02164	0.0259536	0.0703575	0	1.001	0	0.156664	0.215319
3906			[686][M]3+		M696T308_1	5.1313		0.801795	696.056	1.02162	0.0106689	0.0425807	0	0.993506	0	0.22067	0.0425344
1888			[263][M+1]+		M386T382	6.3663	↑	1.24217	386.225	1.0215	0.0681514	0.121436	0	1.37613	0	0.116484	0.86725
1920					M391T136	2.27329		1.04601	391.227	1.02116	0.491234	0.350139	0	0	0	0.065767	0.706738
1488			[194][M+2]+		M312T32	0.529193		1.05924	312.117	1.01955	0.367567	0.299359	0	0	1.001	0.0771873	0.657267
3010					M558T275_4	4.58645	↑	1.20029	558.124	1.01854	0.0104362	0.0421801	0	-1.001	1.39614	0.247409	0.416212
2980					M555T268_1	4.46398	↑	1.48562	555.287	1.01805	0.0412935	0.0911131	0	-0.606374	1.001	0.172402	2.36605
1444			[190][M+1]2+		M308T26	0.430679	↑	1.22013	307.585	1.01789	0.996895	0.518016	0	0.842253	0	0.0646078	0.777163
4610			[837][M+3]5+		M851T297	4.95538		0.839698	851.045	1.01777	0.0261309	0.0706449	0	-1.00101	0	0.206669	0.650639
862					M225T377	6.28055		0.82387	225.149	1.01759	0.139126	0.178408	0	0.106228	0	0.142656	0.546166
833					M221T62	1.02712		1.14858	221.095	1.01744	0.200325	0.216224	0	-1.001	1.001	0.059385	1.08491
786					M215T418	6.96263	↑	1.27438	215.164	1.01725	0.00383606	0.025275	0	1.23287	-1.001	0.303504	0.59442
3383			[593][M+1]6+		M618T288_1	4.80691		1.16699	617.5	1.01723	0.0321791	0.0797921	0	1.001	0	0.167521	1.00925
2395					M479T205_4	3.41102		0.84518	479.255	1.01718	0.967206	0.510464	0	-1.00479	0	0.0213796	0.158555
2914			[488][M+1]7+		M548T286_2	4.76292		1.02232	548.435	1.016	0.201258	0.216708	0	1.001	0	0.115712	0.222776
3007			[509][M+1]6+		M558T275_2	4.58643	↑	1.20867	557.79	1.01559	0.00905039	0.0395665	0	-0.867266	1.001	0.258201	0.574419
2751			[455][M]3+		M526T272_1	4.52531		1.15065	525.614	1.01527	0.0120287	0.0458405	0	1.001	-1.001	0.214663	0.0239464
387			[55][M]+		M160T22	0.373217	↓	0.700436	160.133	1.01525	0.671587	0.419968	0	1.01018	0	0.0188209	0.537737
2088					M423T516	8.59728	↑	1.40982	423.204	1.01448	0.0629524	0.115998	0	-0.817772	0	0.23839	0.425472
2230					M448T162	2.69288		1.10744	447.588	1.01445	0.0923235	0.142632	0	1.18803	0	0.172659	0.63835
1296				[M+H]+ 282.167	M283T156	2.59456		0.858337	283.175	1.01444	0.0589521	0.111874	0	-0.350243	0	0.212834	0.142334
847			[118][M+1]+		M222T99	1.65256		0.83756	222.128	1.01432	0.00896928	0.0394003	0	1.37367	0	0.224758	0.364745
1866			[257][M+1]+		M382T466	7.7647		1.00396	382.113	1.01412	0.56455	0.37863	0	0	0	0.0695927	0.812573
2665					M515T288_3	4.79829		1.14052	515.42	1.01376	0.0935933	0.143591	0	-1.001	0	0.133298	1.41865
1679			[230][M+1]3+		M346T146	2.43334		1.11034	345.531	1.01358	0.394985	0.310668	0	0.514518	0	0.0691209	0.50171
165					M123T139	2.31429		0.807695	123.055	1.01299	0.0090794	0.0396256	0	-1.2871	-1.001	0.199259	1.53522
2444					M486T240_1	4.00614		0.827349	485.767	1.01173	0.486423	0.348317	0	-1.00138	1.3653	0.00748507	0.0630488
198					M130T204	3.3943	↓	0.79007	130.065	1.01126	0.0442342	0.0946768	0	1.001	1.41692	0.205501	0.807702
1457			[192][M+1]+		M309T43	0.709615		1.12179	309.094	1.01118	0.23193	0.232785	0	1.21877	0	0.109714	0.188596
824	Pantothenic acid		[115][M]+		M220T109	1.81956	↑	1.42837	220.118	1.01053	0.00970953	0.0408609	0	1.05371	-1.001	0.230235	0.0188125
587					M189T34	0.572589		0.845629	189.073	1.00998	0.280833	0.258465	0	-1.00118	0	0.124644	1.00354
4367			[780][M+1]+		M780T289_7	4.81677	↓	0.775616	780.155	1.00905	0.00425589	0.026761	0	-0.348079	0	0.249225	0.537328
698					M204T75	1.25	↑	1.21182	203.607	1.0084	0.00186787	0.0178152	0	-0.878515	-1.001	0.284915	0.840014
2622					M510T134	2.23918		1.10269	510.132	1.00834	0.531083	0.365305	0	0.265982	0	0.10699	0.197254
3470				[M+Na]+ 606.163	M629T24	0.405031		0.949077	629.153	1.00828	0.87734	0.48609	0	0	0	0.027892	0.404235
2385			[364][M+1]3+		M478T247_2	4.1132	↑	2.09479	478.251	1.00818	0.427181	0.324423	0	0	1.001	0.0259403	0.597847
2205					M443T277	4.62006		0.818067	443.322	1.00796	0.118801	0.163215	0	-1.13914	0	0.114081	0.373297
109			[14][M]+		M114T21	0.354212		0.997804	114.067	1.00793	0.68362	0.424299	0	-1.10909	0	0.040299	0.0697312
769					M213T146	2.42559	↓	0.788308	213.073	1.00784	0.364698	0.298129	0	1.00101	0	0.0234136	0.675669
2437					M484T467	7.77825	↓	0.678104	484.384	1.00746	0.59047	0.388973	0	-0.962722	0	0.0377845	0.479327
1334				[M+NH4]+ 272.126	M290T202	3.36072	↓	0.788031	290.16	1.00736	0.215802	0.223964	0	-1.00101	0	0.102313	0.630622
3306					M608T293_4	4.88888	↓	0.783801	607.863	1.00736	0.01438	0.0509696	0	0.985905	0	0.292587	1.25176
2984					M556T268_2	4.46398	↑	1.46858	555.789	1.00636	0.0626976	0.115722	0	-1.01407	1.001	0.154198	2.43132
1719					M352T148	2.47216		1.15403	352.201	1.00602	0.085237	0.137026	0	1.00099	0	0.118254	0.877405
4516					M828T273	4.54995		0.849313	827.884	1.00583	0.842056	0.475843	0	-0.961694	0	0.0104735	0.761103
778					M215T58	0.958671	↑	1.21668	214.646	1.00534	0.0176562	0.0570914	0	1.41112	-1.001	0.172082	1.79832
1600			[218][M+2]+		M333T24	0.406051		0.829035	333.053	1.00512	0.771872	0.454196	0	-1.49904	1.001	0.0803282	0.853679
732				[M+Na]+ 183.905	M207T19	0.312977		0.9914	206.894	1.00505	0.959022	0.50834	0	0.756988	0	0.0100389	0.426883
3316			[577][M]2+		M608T281_2	4.686		0.919037	608.304	1.00485	0.445432	0.332087	0	1.001	0	0.0954461	0.33291
1064				[M+K]+ 211.905 [M+Na]+ 227.88	M251T19	0.308871		1.01103	250.868	1.00425	0.958212	0.508129	0	0.329728	0	0.0180366	0.450933
2138					M431T225_1	3.74635	↑	1.37372	431.025	1.0042	0.0247532	0.0685247	0	-0.950678	0	0.219159	1.69492
423					M165T33	0.542098		1.15489	165.039	1.00418	0.407471	0.315952	0	0	0	0.064042	0.51922
1872					M384T21	0.342737	↑	1.20076	384.119	1.00413	0.269091	0.252352	0	1.001	-1.30083	0.116526	0.797389
931				[M+K]+ 195.931 [M+Na]+ 211.905	M235T19	0.309092		1.10212	234.894	1.00401	0.539992	0.368811	0	-0.729654	-1.001	0.0393087	0.421691
1995					M406T429	7.1447		0.847084	406.165	1.00371	0.56227	0.377733	0	1.001	0	0.0318925	0.30267
1172			[153][M+1]+		M266T173	2.89015	↓	0.725819	266.122	1.00262	0.00863096	0.0386892	0	-1.001	1.001	0.271563	1.99526
1761					M360T356	5.93635	↑	1.37457	360.275	1.00257	0.0149753	0.0521563	0	1.001	1.001	0.215327	0.733551
4718					M891T322	5.37029		0.847897	890.533	1.00231	0.0238476	0.0671648	0	1.00057	0	0.206763	1.92089
3416					M622T208	3.45962		1.0102	621.57	1.0021	0.579361	0.384468	0	-1.01252	0	0.0872948	0.0939191
3009					M558T275_3	4.58081	↑	1.22802	557.957	1.00193	0.0113274	0.0441579	0	-0.998266	1.001	0.259561	0.654082
854					M223T126	2.10688	↑	1.43665	223.108	1.00149	0.0417959	0.0916649	0	-0.851383	0	0.137022	0.542381
3243					M599T292_2	4.86568	↑	1.27222	598.812	1.00082	0.00735726	0.0357298	0	-1.04139	-1.41508	0.228845	1.5436
3869			[679][M+1]3+		M692T296_3	4.92641		0.850137	691.935	1.00081	0.0284355	0.0742867	0	-1.001	0	0.260493	1.81399
2642			[426][M]2+		M513T286_1	4.76677		0.879052	512.511	1.00026	0.868914	0.483679	0	1.001	0	0.005441	0.145192
3100					M571T289_1	4.81129		1.12256	570.636	1.00009	0.0218074	0.0639737	0	-0.612058	0	0.186321	0.188336
2018			[288][M+2]+		M409T32	0.533684		1.01695	409.047	0.999734	0.808677	0.465766	0	0.810415	1.001	0.0022008	0.108118
635			[89][M+1]+		M194T41	0.687398		0.800851	194.1	0.999481	0.0362509	0.0851779	0	-0.696387	1.60433	0.164664	0.231346
255					M138T22	0.362887	↓	0.733925	138.053	0.999226	0.20082	0.216482	0	0.948835	0	0.0652501	0.247765
2787			[462][M+4]7+		M530T289_1	4.8087		1.14841	530.002	0.998402	0.0426609	0.0926236	0	-1.001	0	0.157793	1.23457
2629			[421][M]6+		M511T292_1	4.86553		1.15145	510.6	0.998382	0.0877566	0.139071	0	1.07552	1.001	0.158666	0.289944
302					M146T140	2.33264	↓	0.776179	146.063	0.997829	0.0576199	0.110466	0	-1.05485	-1.001	0.153096	0.685779
2145					M432T125	2.07758		0.997174	432.245	0.997754	0.23963	0.236822	0	-1.00133	0	0.113599	0.913995
3538			[625][M+2]3+		M639T219	3.65352		0.998251	638.695	0.997716	0.701575	0.430644	0	0.991703	0	0.0526982	1.09127
2359					M473T23	0.377143	↑	1.38624	473.119	0.997005	0.0352612	0.0839214	0	-1.03659	-1.001	0.219566	0.396339
4722					M891T321	5.35685		0.841597	890.77	0.996776	0.0350358	0.0836307	0	-0.918018	0	0.172907	1.85443
1922					M392T137_1	2.27524		1.06664	391.895	0.996763	0.419544	0.32113	0	-1.001	0	0.0719377	0.597757
1412					M303T120	2.00472		1.00702	302.65	0.996507	0.359191	0.295743	0	1.33152	0	0.0804161	0.443476
1733					M356T73	1.21751		0.821106	355.7	0.995826	0.434916	0.327706	0	-0.892446	1.001	0.0821821	0.330357
1153					M264T73	1.22312		1.02739	264.144	0.995523	0.9362	0.50232	0	-1.00613	0	0.00237842	1.30155
1048			[139][M+2]+		M249T111	1.85739		0.848262	249.127	0.995005	0.0543114	0.106841	0	0.999228	0	0.227399	1.10492
488				[M+2Na-H]+ 129.079	M174T80	1.3409		1.03068	174.051	0.994917	0.411573	0.317703	0	-1.00102	0	0.0814181	0.237538
4001			[709][M]5+		M714T294_1	4.89331		0.830749	713.788	0.994837	0.00608226	0.0323629	0	0.825515	1.001	0.223991	0.800308
4542			[822][M+3]5+		M832T295_7	4.91322		0.881726	832.124	0.994611	0.0778064	0.130637	0	-0.799209	0	0.187531	2.30001
2494			[388][M+1]2+		M492T181_2	3.01735		0.871488	492.252	0.994263	0.836037	0.474054	0	-1.00654	0	0.0027346	0.76062
3382			[593][M]6+		M617T288	4.80661		1.13684	617.333	0.993752	0.039158	0.0886902	0	-1.001	0	0.170301	0.457002
2052			[298][M+1]3+		M415T192	3.1939		1.11482	414.568	0.993507	0.168419	0.198137	0	-1.001	0	0.120675	0.670041
561					M186T19	0.322853	↓	0.783117	185.96	0.993477	0.0376389	0.086887	0	-0.807688	1.001	0.195218	0.263493
1312					M287T81	1.34591	↓	0.789153	287.039	0.993456	0.814573	0.467574	0	-1.001	0	0.03183	0.731079
177					M125T146	2.43261		0.818775	125.12	0.993437	0.232654	0.23317	0	-0.4509	0	0.0861147	0.662057
4876			[902][M+1]3+		M953T290	4.82793		0.816484	953.079	0.991732	0.0056545	0.0311383	0	-1.37386	0	0.196969	0.959277
1434					M307T79	1.31439	↓	0.61392	307.044	0.991487	0.0209859	0.0626437	0	-1.06972	0	0.199644	0.305186
3528			[625][M]3+		M638T219_1	3.65091		1.05203	638.027	0.991422	0.487089	0.348571	0	-1.001	0	0.0791526	0.755306
1722					M353T148_2	2.47224		1.17295	352.869	0.991256	0.0615083	0.114498	0	-1.00016	0	0.130417	0.79192
1595					M332T59	0.979209		0.967338	332.075	0.990556	0.67634	0.421686	0	1.001	-1.001	0.0463284	0.628103
2461			[380][M]+		M488T91	1.50945	↑	1.24914	488.235	0.99038	0.0748057	0.127893	0	0	0	0.188029	0.785935
1758					M359T204	3.40051		0.865507	359.442	0.990028	0.843365	0.47623	0	0	0	0.0167896	0.271309
1912			[270][M]3+		M391T263_1	4.38341		1.15307	390.547	0.989955	0.236121	0.234997	0	-0.00641591	0	0.0935731	0.0279597
685					M203T134	2.2415	↓	0.706032	203.048	0.989861	0.545438	0.371019	0	0	-1.001	0.0253397	0.15885
4719				[M+H-H2O]+ 907.596	M891T323_1	5.38772		0.831701	890.59	0.989496	0.024236	0.0677538	0	-1.01206	-1.001	0.187686	1.77774
2512					M496T150	2.49906	↑	1.25281	496.182	0.989384	0.128704	0.170504	0	1.6498	-1.001	0.167706	0.562234
1601					M333T374	6.22729	↑	1.21917	333.077	0.98931	0.095008	0.144759	0	-1.21755	1.001	0.167497	0.529011
3757					M674T386	6.42575		0.871177	674.214	0.988594	0.332379	0.283614	0	-1.001	1.001	0.090933	0.109379
2032			[297][M+1]5+		M411T202_2	3.36199		0.891457	411.031	0.988336	0.804736	0.464551	0	0	1.001	0.049814	0.166882
838			[116][M+1]+		M221T428	7.13786		0.812549	221.136	0.98758	0.00726134	0.0354868	0	-0.983924	0	0.216063	0.0473443
2765			[459][M]5+		M528T230_1	3.8371		1.19121	528.289	0.987443	0.0778136	0.130644	0	1.001	-1.001	0.224529	0.438703
2484			[384][M+1]+		M490T506	8.43523		0.894028	490.231	0.987116	0.0415962	0.0914464	0	-0.923942	0	0.16776	0.406789
1983				[M+NH4]+ 386.141	M404T57	0.947464		0.822801	404.175	0.987037	0.118651	0.163107	0	-0.872664	0	0.0948021	0.120966
1987			[284][M+1]+		M404T236	3.93189		1.02854	404.258	0.986802	0.571805	0.381463	0	0.761673	0	0.0700186	0.120126
4284			[765][M]3+		M765T280_1	4.67437		0.869921	765.079	0.986754	0.659264	0.415463	0	1.001	0	0.0247596	0.0144908
2424					M483T262	4.35951		0.869225	482.776	0.986697	0.53157	0.365488	0	0	0	0.0628393	0.219775
1415			[185][M]+		M303T83	1.383		1.18799	303.145	0.986468	0.539451	0.368591	0	1.001	0	0.0203965	0.111957
3494			[615][M]6+		M632T307_1	5.11489		1.14657	631.503	0.986177	0.0515119	0.103622	0	0	0	0.181665	1.23313
1996			[285][M+2]+		M406T392	6.52586		1.14909	406.212	0.985691	0.0373935	0.0865893	0	1.00751	1.21921	0.202447	1.93299
3122					M574T44	0.737301		1.14529	574.011	0.985687	0.466144	0.340452	0	0.523916	0	0.0743683	0.126971
3095			[533][M]6+		M570T289_1	4.81293		1.14395	570.134	0.985419	0.0194104	0.0600238	0	1.00022	0	0.203735	0.542184
4812					M924T294_2	4.89957		0.91183	924.029	0.985114	0.161428	0.193731	0	0	0	0.130205	1.94076
1705			[233][M+1]+		M350T45	0.754108		0.988688	350.057	0.984954	0.90466	0.493752	0	-1.03099	0	0.0141946	0.225247
1138					M263T401	6.68307	↑	1.32973	262.617	0.984888	0.0433187	0.0934886	0	1.00136	1.001	0.1515	0.851438
3058					M563T269	4.49029		1.16343	562.583	0.984851	0.123207	0.166324	0	-1.43863	0	0.100471	1.03646
1406				[M+Na]+ 278.151	M301T477	7.95085	↓	0.52433	301.141	0.983579	0.728179	0.439792	0	1.00057	0	0.00286486	0.635557
2172					M438T250	4.16682		0.902043	437.702	0.983467	0.996386	0.517888	0	1.001	0	0.0227906	0.833478
758			[106][M+1]+		M211T30	0.50546		1.14556	211.064	0.983459	0.246168	0.240153	0	-0.570507	0	0.0894873	0.0746988
171					M125T18	0.293457		0.886491	124.923	0.983333	0.881523	0.487278	0	-1.16949	0	0.0295383	0.910615
2144					M432T392	6.52648	↑	1.344	432.238	0.983206	0.0691598	0.122449	0	-0.352186	0	0.197498	1.08397
2310					M465T245	4.08965		1.0089	464.636	0.983086	0.294358	0.265311	0	0	0	0.102572	0.210874
3560					M640T295_6	4.91366		0.895991	640.249	0.983086	0.0391421	0.0886717	0	-1.00127	0	0.22794	2.15758
235					M135T408	6.80335		0.834799	135.08	0.982351	0.209431	0.220851	0	-1.00324	1.001	0.0963467	0.798222
4041					M721T323_1	5.37938		0.833597	721.05	0.982115	0.0271131	0.0722082	0	-1.001	0	0.240048	2.26382
3263			[568][M]+	[M+H]+ 600.311	M601T154	2.55878		1.02039	601.32	0.981713	0.191146	0.211334	0	-0.903231	1.001	0.112745	0.67869
3374					M615T184	3.06567		1.0665	615.335	0.981413	0.117031	0.161934	0	0	0	0.146582	0.880901
4525			[821][M]5+		M830T302_2	5.0312		0.811105	829.823	0.98128	0.077843	0.13067	0	-0.942139	-1.001	0.193818	0.50556
915					M232T488	8.14036		1.14975	232.169	0.981198	0.012637	0.04724	0	1.11687	1.6691	0.178613	0.203705
2234			[334][M]+		M448T392	6.52618	↑	1.54575	448.232	0.980009	0.0848342	0.136694	0	-1.00143	0	0.227475	2.71415
2691			[440][M]3+		M519T281_1	4.68207		1.18125	518.591	0.979674	0.174757	0.201985	0	-1.00084	0	0.101091	0.183688
4386			[787][M]7+		M787T305_1	5.08051		0.845017	786.544	0.978671	0.089224	0.140235	0	-0.98174	0	0.198805	0.679941
870				[M+Na]+ 204.09	M227T129	2.14325	↓	0.776002	227.079	0.978581	0.0688765	0.122166	0	-1.001	0	0.17911	0.679552
2479					M489T467	7.77876	↓	0.786032	489.339	0.978553	0.365294	0.298386	0	0.705756	0	0.0903053	0.138798
319			[43][M+1]+		M147T17_2	0.276652		1.169	147.168	0.97743	0.361821	0.296887	0	-0.9843	0	0.0527127	0.0915234
1437			[190][M]2+		M307T26	0.429972		1.16548	307.084	0.977141	0.804816	0.464575	0	0.839921	0	0.0832263	1.05865
3280			[572][M+1]+		M605T120	2.00422		0.873276	605.297	0.976975	0.898266	0.49198	0	1.001	-1.001	0.0331165	0.817161
757					M211T138	2.30382	↓	0.716552	211.058	0.976592	0.0668825	0.120142	0	-1.00289	1.001	0.184302	0.16954
4724					M891T323_5	5.38419		0.84164	890.883	0.976367	0.038921	0.0884134	0	0.990513	0	0.172144	1.90657
3802					M685T289	4.81883		0.863962	684.562	0.976161	0.015088	0.0523763	0	-0.992984	1.001	0.247395	0.429538
2583			[411][M]2+		M505T293_1	4.87869		1.15814	505.117	0.976152	0.0293165	0.0756346	0	1.001	0	0.214944	0.182965
901					M231T373	6.22469		1.19854	230.536	0.975697	0.039215	0.0887565	0	1.01633	0.0179	0.18746	0.406248
3342					M610T223	3.72452	↑	1.25124	610.319	0.975497	0.300532	0.268343	0	-1.0017	0	0.0858471	0.709258
1199					M269T144	2.39948		1.19774	269.161	0.975424	0.225679	0.229414	0	0.120213	0	0.0606887	1.094
1467			[192][M+2]+		M310T43	0.70873		1.15334	310.089	0.975403	0.298682	0.26744	0	-0.871953	0	0.0975845	0.207067
1945			[276][M+1]3+		M396T163_2	2.70898		1.08482	396.233	0.975289	0.244915	0.239521	0	0.998058	0	0.111215	0.435815
836			[118][M]+		M221T99	1.65434	↓	0.774391	221.126	0.97527	0.146055	0.183389	0	-1.001	1.85285	0.128087	1.9427
4726					M891T323_6	5.38021		0.829553	890.943	0.975067	0.0424915	0.0924366	0	1.001	0	0.170337	1.47919
1550			[204][M+2]2+		M324T471_1	7.85519	↑	1.2033	323.655	0.974878	0.0573216	0.110147	0	1.06938	0	0.185761	0.390096
395					M161T468	7.79412		0.828855	161.096	0.974745	0.643235	0.409498	0	1.21043	-0.433223	0.04279	0.306795
2069			[301][M]+		M418T94	1.56985		0.826373	418.23	0.974459	0.853731	0.479278	0	1.001	0	0.0113191	0.885992
1816					M369T23	0.376633	↓	0.775122	369.249	0.974362	0.0621372	0.115128	0	0	0	0.158044	0.422496
4564			[828][M]3+		M841T323_2	5.37776		0.833337	841.169	0.973367	0.0373103	0.0864879	0	1.00085	0	0.186173	2.26888
2322			[348][M+1]5+		M466T238_2	3.96676		0.887828	466.261	0.973119	0.445678	0.332188	0	-1.001	0	0.0667884	0.231968
1936					M394T260	4.34149	↓	0.615902	394.197	0.972987	0.11449	0.160064	0	0.926887	0	0.150733	1.53324
303					M146T78	1.30628		0.873736	146.081	0.972951	0.00405981	0.0260842	0	-0.38042	0	0.242603	1.1924
4534					M831T295	4.91135		0.899044	831.423	0.97283	0.051831	0.103996	0	-0.845539	0	0.203536	1.53695
4804			[885][M+1]3+		M923T302_2	5.03999		0.861947	922.693	0.972787	0.00353342	0.0241124	0	0.779826	0	0.235263	0.67203
33					M90T21	0.355882		0.864192	90.0549	0.972678	0.928523	0.500261	0	0.993408	1.001	0.0223514	0.441863
636					M194T162	2.698	↓	0.712409	194.117	0.972496	0.273149	0.254461	0	0.615314	0	0.102895	0.80742
1088				[M+K]+ 215.853	M255T19	0.312373		0.849	254.817	0.972293	0.816806	0.468255	0	-1.001	-1.001	0.0101582	0.424928
1748			[235][M+1]+		M357T532	8.8606		1.11404	357.355	0.971977	0.214128	0.223156	0	-1.02741	0	0.117476	1.32436
1045				[M+2H]2+ 496.151	M249T81	1.34353		0.853391	249.083	0.971299	0.81067	0.466378	0	0.846201	0	0.0371295	0.486736
4215					M754T295_1	4.92475		0.866566	754.383	0.970649	0.00825895	0.037873	0	1.00099	-0.687127	0.315052	2.71548
1594			[218][M+1]+		M332T24	0.405465		0.855797	332.057	0.969508	0.591385	0.389341	0	1.00186	0	0.00501524	0.390426
2565			[404][M]2+		M503T247	4.114	↑	1.22195	503.231	0.969249	0.0244787	0.0681175	0	-1.01914	1.001	0.2599	0.350032
4289			[765][M+1]3+		M765T280_2	4.67365		0.96447	765.413	0.969024	0.758932	0.450008	0	0	0	0.038635	0.275149
1967				[M+K]+ 362.165	M401T516	8.59813	↑	1.33542	401.128	0.968225	0.0218306	0.0640106	0	-0.904676	-1.001	0.272984	0.367315
1579			[216][M+1]3+		M330T146_2	2.43602		0.966595	329.852	0.968133	0.715918	0.435613	0	0.895638	0	0.0382832	0.151688
3712			[651][M]6+		M668T313	5.22178		1.16423	667.526	0.96811	0.0156131	0.0533829	0	1.37993	-1.3246	0.245452	0.309869
1564			[210][M]2+		M328T154	2.55869		1.12319	327.618	0.967846	0.0644803	0.117635	0	-1.001	0	0.131385	1.06272
1377			[181][M]4+		M296T150_1	2.50159	↑	1.43586	295.91	0.96767	0.256722	0.245746	0	0.570489	0	0.0425795	1.18118
3107			[535][M+1]6+		M572T313_2	5.22142		1.1409	572.312	0.967669	0.01487	0.0519494	0	-1.34069	0	0.177875	0.377363
1124				[M+Na]+ 238.121	M261T356	5.92523		0.905881	261.11	0.967144	0.137078	0.176895	0	-1.377	0	0.154288	0.858835
74					M105T165	2.75772	↓	0.653157	105.034	0.966965	0.145482	0.182985	0	1.00238	-1.001	0.122529	0.596696
2174			[320][M+1]3+		M438T163_2	2.70901		1.06938	437.903	0.966431	0.373013	0.301669	0	1.35132	0	0.0748325	0.568593
2252			[339][M+1]4+		M452T258	4.30832		0.841978	451.753	0.965938	0.318329	0.276899	0	-0.681529	0	0.0585156	0.698535
999					M243T101	1.68415		0.866997	243.17	0.965006	0.00872219	0.0388838	0	-1.63362	0	0.270166	1.22191
3060			[523][M]7+		M563T270_1	4.4967		1.16174	562.726	0.965005	0.0569902	0.10979	0	-1.00302	-1.001	0.122741	1.46661
3244			[563][M+1]4+		M599T246_2	4.10642	↑	1.66094	598.821	0.964646	0.083677	0.13573	0	-1.001	0	0.168948	0.290747
4245					M757T295_3	4.90859		0.864945	756.749	0.964179	0.0640334	0.117159	0	1.001	0	0.203205	2.06671
4437			[797][M+1]7+		M800T310_2	5.16789		0.876145	800.118	0.964123	0.0104243	0.0421593	0	1.24127	0.404292	0.278684	1.88189
3430					M623T428	7.14013		0.808327	623.319	0.964095	0.0270795	0.0721555	0	-0.978567	0	0.156573	1.47189
2624					M510T281	4.68742	↑	1.22775	510.238	0.963764	0.00251928	0.0204112	0	-1.30375	0	0.27108	0.142843
121			[15][M+1]+		M116T22_1	0.368861		0.80377	116.04	0.963648	0.0184923	0.0585217	0	1.02891	0	0.183383	0.295409
1382					M296T151	2.51369	↑	1.3975	296.411	0.963481	0.247278	0.24071	0	1.001	0	0.0495196	1.21125
470					M171T56_1	0.933357		1.12277	171.063	0.962623	0.0935477	0.143557	0	0	-0.0743298	0.164539	0.758256
4109			[730][M]2+		M733T286_1	4.77252		1.18776	732.891	0.962325	0.00213327	0.0188798	0	0.801611	0	0.323609	0.925634
2888					M546T283_3	4.72025		1.19315	546.054	0.961722	0.103179	0.15126	0	1.05195	0	0.118018	0.204179
1850			[255][M+1]+		M377T401	6.68113		0.853369	377.263	0.961698	0.172647	0.200718	0	-1.001	0	0.138393	1.35555
2483			[386][M+1]3+		M490T288_2	4.79546		1.09867	489.915	0.961525	0.302858	0.26947	0	1.001	-1.001	0.0705418	0.285002
2089					M424T225	3.7533	↑	1.56072	423.726	0.961135	0.15895	0.192126	0	0	0	0.0795461	0.788465
2676					M517T40	0.669404		0.972285	517.083	0.960732	0.690036	0.426583	0	0.969651	0	0.0998813	0.463152
3386			[593][M+2]6+		M618T288_2	4.80691		1.15168	617.667	0.960148	0.0436491	0.0939192	0	-1.1052	0	0.15563	1.09217
345				[M+Na]+ 129.043	M152T52	0.87498		0.896011	152.032	0.959657	0.555949	0.375232	0	1.001	0	0.0531779	0.310542
4019					M715T290_2	4.83761		0.854559	715.308	0.959604	0.00171508	0.0171699	0	-1.15632	0	0.281671	1.82297
1336					M290T123	2.05166	↑	1.28592	290.171	0.959473	0.11484	0.160323	0	1.001	0	0.110991	0.164018
2082					M422T190_1	3.17244	↑	1.45195	421.989	0.959389	0.918012	0.497415	0	1.001	0	0.00909711	0.92049
269					M141T19	0.314469		0.85375	140.903	0.95919	0.762873	0.45129	0	-1.001	1.001	0.0357349	0.289171
4537					M832T295_2	4.9132		0.902286	831.623	0.958558	0.109872	0.156562	0	-1.00099	1.001	0.16472	2.16074
3540					M639T296_3	4.93515		0.852919	638.786	0.958077	0.00361756	0.0244439	0	0.502489	-1.001	0.313995	1.25212
702					M204T22	0.366397	↑	1.3799	204.086	0.957611	0.481332	0.346372	0	0.381589	-1.001	0.118278	1.27311
872					M227T107	1.7785	↓	0.679569	227.103	0.956076	0.134517	0.174977	0	-1.2111	1.001	0.114055	0.523537
1977					M403T34	0.573094		1.16907	403.096	0.956033	0.491897	0.350388	0	0.97391	0	0.115441	0.453698
2443					M486T196	3.27207		0.992347	485.748	0.955909	0.387014	0.307461	0	1.001	0	0.089419	0.568087
1637					M338T47	0.790344		0.85335	337.993	0.955838	0.491327	0.350174	0	1.3751	0	0.0841182	0.347544
2208					M444T42	0.700975		1.06069	444.129	0.955765	0.304975	0.270492	0	0.998623	0	0.0853577	0.590265
701					M204T61	1.02079		0.81059	204.063	0.955547	0.0642451	0.117385	0	1.001	0	0.184296	0.906964
2710			[442][M+1]2+		M521T216	3.60768		0.916055	520.765	0.955235	0.823744	0.470362	0	1.00115	0	0.0276003	0.0150693
2700			[442][M]2+		M520T216	3.60662		0.936155	520.264	0.955174	0.79168	0.460484	0	0	0	0.028333	0.138181
3169					M583T247	4.12275	↑	1.31621	582.908	0.954988	0.227915	0.230629	0	0	0	0.127844	0.587458
2432				[M+H]+ 483.107	M484T38	0.630425	↓	0.764525	484.114	0.954752	0.654495	0.413701	0	0	1.001	0.00536211	0.627534
2472			[381][M+2]5+		M489T247_3	4.11408		0.908129	489.078	0.954592	0.994523	0.517421	0	1.001	0.108467	0.0338411	0.251991
2044					M413T206	3.43074		1.11338	413.432	0.954459	0.104727	0.152499	0	1.001	0	0.173303	0.328633
2050					M414T401	6.6815		0.826146	414.215	0.954133	0.028821	0.0748807	0	1.04436	0	0.217355	0.547942
4641					M859T312	5.2063		0.849355	858.718	0.953769	0.00374384	0.0249293	0	-1.18912	1.001	0.266603	0.160238
2049					M414T150_2	2.50263	↑	1.24614	414.001	0.9536	0.0215474	0.0635578	0	1.0097	0	0.260908	0.198265
4138					M738T385	6.42126		0.841201	738.224	0.95351	0.00767491	0.0365131	0	1.20681	0	0.241897	0.668456
4171					M744T285	4.75633	↑	1.26945	743.56	0.953183	0.0142774	0.0507607	0	1.00083	-0.569405	0.271156	0.277673
1960					M400T195	3.24557	↑	1.21497	400.227	0.952078	0.0237875	0.0670729	0	1.001	0	0.289034	0.210351
2621			[418][M+2]7+		M510T294_4	4.90018		1.09232	510.136	0.951657	0.152963	0.188152	0	-0.120175	0	0.119792	0.108851
1694			[231][M+1]3+		M348T134	2.23087		1.08138	347.519	0.951594	0.415412	0.319328	0	0.986962	1.36008	0.0751765	0.0975901
1360					M294T90	1.50085	↑	1.33074	294.145	0.95112	0.248981	0.24156	0	-1.001	0	0.0509502	0.580772
69					M104T38	0.62767		0.833684	104.053	0.951009	0.0570633	0.109869	0	-0.876957	1.001	0.207521	2.14681
2448			[377][M+1]5+		M486T282_2	4.70733		0.868288	486.051	0.950869	0.603993	0.394368	0	1.001	0	0.0135003	0.1555
2952					M551T289_2	4.81098		1.12397	551.291	0.9506	0.103905	0.151834	0	1.00008	0	0.163288	1.19579
1777			[245][M]+		M363T323	5.3899	↑	1.27191	363.218	0.950161	0.0576057	0.110451	0	0.710371	1.001	0.254454	1.58469
2188				[M+H]+ 438.258	M439T92	1.53199		0.844916	439.266	0.949882	0.162225	0.194242	0	1.001	0	0.0984557	0.0644106
2280					M457T272_2	4.53787		0.860312	457.367	0.949648	0.573946	0.382294	0	0	0	0.0189753	0.196694
3294					M607T282_2	4.69601		0.858557	607.311	0.949288	0.219923	0.226233	0	1.10256	-1.001	0.0945081	0.0288679
2068			[300][M+1]3+		M418T156_2	2.60206		1.05988	418.225	0.948499	0.162307	0.194294	0	0	0	0.113652	0.0336297
2222					M447T220_1	3.66786		1.11609	446.756	0.948116	0.1073	0.154553	0	-1.001	0	0.151619	0.255337
3367			[588][M+1]+		M614T52	0.874163	↑	1.23618	614.162	0.948115	0.294635	0.265448	0	0.588246	0	0.132379	0.233459
936					M236T139	2.31561	↑	1.35123	235.67	0.948107	0.16256	0.194456	0	-1.16818	0	0.112965	0.0232195
2482			[386][M]3+		M490T288_1	4.79546		1.10126	489.581	0.948091	0.363618	0.297664	0	-1.00099	1.001	0.0712028	0.254394
2445			[377][M]5+		M486T282_1	4.70736		0.872042	485.85	0.948073	0.537644	0.367854	0	0.950844	0	0.0313698	0.0674732
2447					M486T240_2	4.00329		0.846387	486.018	0.947174	0.4835	0.347202	0	0.873644	0.996557	0.0369773	0.301083
1908			[267][M+2]5+		M389T240	4.00686		0.85581	389.216	0.946652	0.0174776	0.0567779	0	0	0	0.207124	1.0189
3086			[529][M]+	[M+H]+ 567.332	M568T451	7.52415	↓	0.682517	568.34	0.946459	0.280724	0.258409	0	-1.01523	0	0.0913436	0.477723
4535			[822][M]5+		M832T295_1	4.91732		0.903236	831.523	0.946312	0.0864277	0.138	0	0.0234548	0	0.179046	1.90434
988			[132][M+1]+		M242T76	1.26362		0.834594	242.158	0.94616	0.0180555	0.0577822	0	0	1.001	0.250511	1.05994
4638					M858T290	4.83463		0.844374	858.069	0.945888	0.00728709	0.0355523	0	0	0	0.238443	1.7699
2524			[396][M+1]+		M497T471_2	7.84678	↓	0.785898	497.344	0.945834	0.717839	0.436272	0	-0.974494	0	0.0422744	0.0196125
1322	Octanoylcarnitine				M288T319	5.31866	↑	1.59631	288.217	0.945653	0.185812	0.208382	0	-0.841884	0	0.0940263	0.309099
2320					M466T77	1.2812	↓	0.551543	466.112	0.945216	0.394921	0.310643	0	1.001	1.001	0.09003	0.268414
2655			[429][M+1]6+		M514T285_2	4.74669		1.13522	514.439	0.945189	0.0881012	0.139346	0	0	0	0.131415	0.663918
3443					M625T292	4.86636		0.840626	624.778	0.944729	0.00387771	0.0254287	0	1.04512	1.41597	0.286617	0.307865
4079					M726T298_5	4.96411		0.887006	726.38	0.944355	0.0797779	0.132387	0	1.35957	0	0.212494	1.03953
1847					M377T33	0.544475		1.09401	377.057	0.943949	0.39651	0.311274	0	-1.001	0	0.0784766	0.221537
227					M134T153	2.55809		0.829637	134.045	0.943291	0.00804432	0.0373848	0	1.001	-1.001	0.251319	1.08978
3111			[535][M+2]6+		M572T313_3	5.22142		1.13151	572.479	0.943268	0.0212859	0.0631347	0	-0.947976	0	0.161467	0.347958
1691					M347T429	7.1453	↓	0.731371	347.137	0.94283	0.214809	0.223486	0	-1.01758	1.001	0.0934479	0.501359
1058					M250T114	1.90804		1.11066	249.65	0.942779	0.173357	0.201146	0	-0.97191	1.001	0.104464	0.178527
4735					M894T308_4	5.14127		0.866997	894.458	0.942375	0.00997097	0.0413478	0	1.001	0	0.245106	1.78956
1746					M357T467	7.78406	↓	0.675916	357.261	0.941932	0.745333	0.445537	0	-1.02029	0	0.0400909	0.23517
2278					M457T273	4.54687		0.817806	457.116	0.941805	0.147135	0.184147	0	-1.15693	0	0.101918	0.280195
2341					M470T298	4.96142		1.14243	469.723	0.941193	0.0432192	0.0933585	0	1.0003	0	0.153696	0.454522
4539					M832T295_4	4.91279		0.921109	831.824	0.941143	0.14806	0.184791	0	-1.001	0	0.146814	2.32923
745				[M+Na]+ 185.902	M209T19	0.312066		0.875603	208.891	0.940871	0.208407	0.220342	0	0.78025	1.001	0.158632	0.44384
2725			[447][M+2]7+		M523T272_1	4.54133		0.841458	522.561	0.940492	0.229913	0.231707	0	0	0	0.0751193	0.469696
2093				[M+K]+ 385.78	M425T19	0.312737		1.05625	424.743	0.940366	0.711534	0.434104	0	-1.09284	0	0.0105467	0.328708
2119					M428T219_3	3.64753		1.13803	428.041	0.940324	0.098763	0.147809	0	0.544685	0	0.186513	1
2431			[375][M]3+		M484T199_1	3.31602	↑	2.27447	483.936	0.940159	0.163841	0.195272	0	-0.777907	0	0.097084	0.554609
898					M230T179	2.98065		0.866037	230.138	0.939962	0.0212993	0.0631565	0	-1.001	0	0.20611	0.291468
402			[57][M]+		M162T21	0.34995		1.09732	162.113	0.939429	0.622287	0.401517	0	-1.001	0	0.0308311	0.137867
1189			[156][M+1]2+		M269T392_1	6.52622		1.19856	268.579	0.939151	0.0436574	0.09393	0	1.14569	0	0.214329	0.864342
338					M151T135	2.25382		0.823196	151.032	0.939004	0.0221677	0.0645429	0	1.001	1.33538	0.220033	0.387842
2269					M455T469	7.82188		0.911527	455.296	0.938999	0.115561	0.160856	0	-1.001	0	0.109722	0.31008
1					M61T373	6.21577		0.882183	61.0395	0.937984	0.580337	0.384867	0	-0.998216	0	0.0420226	0.751324
1404					M301T286	4.76422	↓	0.778798	301.118	0.937816	0.0388758	0.0883603	0	1.001	0.771593	0.169928	0.678447
4223					M755T295_2	4.9176		0.861146	754.747	0.937612	0.0893739	0.140353	0	1.001	-1.001	0.209768	2.17553
4821					M926T305	5.07768		0.855788	925.969	0.937414	0.00472522	0.0282694	0	-1.001	1.70821	0.229555	1.87743
1411			[184][M+1]2+		M303T373_1	6.21504		1.11795	302.538	0.93722	0.073911	0.127056	0	0.0686156	-1.001	0.155324	0.589072
3267			[568][M+1]+		M602T154	2.55887		1.01676	602.323	0.937084	0.213323	0.222765	0	0	1.001	0.0993208	0.775322
35					M91T36	0.599994		0.860696	91.0389	0.937003	0.034357	0.0827448	0	1.00623	-1.41444	0.14663	0.349632
3767			[663][M+2]5+		M676T274_3	4.56315		1.15707	675.903	0.936906	0.0328181	0.0806764	0	0.835919	0	0.204503	0.232581
3226					M595T294_3	4.89346		1.07534	594.991	0.936583	0.250107	0.242125	0	1.001	0	0.09337	0.251457
3561					M640T295_7	4.91198		0.896993	640.327	0.936513	0.032001	0.079543	0	1.001	0	0.201102	1.20395
1202					M269T542	9.03108		1.01761	269.226	0.936159	0.337164	0.285843	0	-1.00644	0	0.0683624	0.719399
3644					M658T152_2	2.52643		0.988879	658.378	0.935754	0.280945	0.258524	0	0	1.001	0.128421	0.328398
4776			[877][M]2+		M916T303	5.05795		0.852323	916.469	0.935723	0.0032634	0.0230244	0	0	0	0.249381	1.86573
2169					M437T206	3.44119		0.838185	437.371	0.9354	0.767094	0.452657	0	0	1.001	0.0249466	0.0456984
512					M179T28	0.470002	↓	0.600789	179.048	0.934703	0.670152	0.419446	0	-1.00098	1.001	0.0350108	0.297788
1744					M357T250_2	4.16731		0.920133	357.205	0.934477	0.852985	0.47906	0	0	0	0.010448	0.23773
658					M198T90	1.49935		1.0642	198.11	0.934217	0.371082	0.300854	0	1.38517	0	0.0913036	0.939058
1729					M354T238	3.96585	↑	1.21795	354.207	0.934106	0.280527	0.258307	0	1.01746	0	0.113365	0.447201
2842			[473][M+1]+		M538T79	1.3109	↑	1.30418	538.172	0.933815	0.275602	0.25574	0	1.001	0	0.125956	0.0301822
264			[36][M+1]+		M140T33	0.543252		0.981045	140.006	0.933814	0.302716	0.269401	0	-1.17008	0	0.0940611	0.244937
1614					M335T467	7.78234		0.829224	335.279	0.933773	0.569703	0.380645	0	-1.06244	0	0.0241594	0.147094
2658					M514T221	3.6813		1.06848	514.473	0.933752	0.20114	0.216648	0	-1.41705	0	0.152216	1.10695
4823			[891][M]3+		M926T304_2	5.0719		0.846739	926.304	0.933731	0.00588125	0.0317979	0	1.37221	0	0.20836	2.20939
4609			[837][M+2]5+		M851T298_2	4.95872		0.86126	850.844	0.93334	0.0592905	0.112227	0	1.00092	0	0.173326	1.12157
4291			[765][M+2]3+		M766T281	4.67505		0.864011	765.747	0.933056	0.560309	0.37696	0	-1.001	0	0.0332854	0.335502
1376					M295T144	2.39785		1.17886	295.165	0.932592	0.0734373	0.126609	0	-1.14895	0	0.135904	0.00645195
891			[123][M]+		M229T23	0.387294	↑	1.38709	229.155	0.932479	0.0994489	0.148354	0	-1.27907	0	0.204599	0.477603
1537					M322T47	0.790932		1.02327	322.077	0.932386	0.606173	0.395229	0	-1.00707	0	0.0153233	0.554884
1823			[252][M]2+		M372T109_1	1.81945		0.982327	371.643	0.932319	0.169004	0.198498	0	1.00101	0	0.121668	0.176897
1144					M263T135	2.24961		1.18456	263.142	0.932263	0.528208	0.364224	0	1.001	0	0.043769	0.150323
1826					M372T182	3.02732		0.868457	372.204	0.932171	0.578275	0.384024	0	-1.001	0	0.0441977	0.340434
1362					M294T85	1.41908		1.19501	294.181	0.932123	0.968542	0.510809	0	1.03443	-1.001	0.013115	0.486193
65			[7][M]+		M101T99	1.65659		1.16792	101.079	0.93196	0.117443	0.162234	0	1.00099	0	0.161947	1.30274
3776					M678T301	5.00893		0.850174	678.368	0.931838	0.041137	0.0909398	0	1.06238	-1.001	0.212571	0.979314
4225					M755T296_2	4.94048		0.865101	754.93	0.931601	0.0594259	0.112368	0	-1.001	0	0.224578	2.79147
3582					M646T299_1	4.98488		0.860584	645.62	0.931398	0.0193505	0.059928	0	-1.09214	0	0.221705	1.24548
462					M170T300	4.99513		0.821607	170.051	0.931017	0.0159093	0.0539374	0	-0.262731	1.35337	0.212831	0.409145
4767			[874][M+1]3+		M913T282_2	4.69691	↑	1.23421	912.953	0.93068	0.0298367	0.0764151	0	0	-1.001	0.248452	0.993791
2617					M510T205	3.41544		0.89721	509.932	0.93063	0.853901	0.479328	0	0	0.118274	0.0176468	0.0817537
1129			[145][M+1]+		M261T106	1.76187	↑	1.2087	261.163	0.930155	0.588231	0.38807	0	0.996384	0	0.00444043	0.495892
3885			[683][M+2]2+		M694T295_3	4.90967		0.902904	693.687	0.930069	0.0536691	0.106115	0	1.10557	0	0.213089	1.7696
1747					M357T432	7.1996	↓	0.531134	357.279	0.929999	0.0763936	0.129358	0	1.001	0	0.187107	0.433367
2553			[400][M+1]3+		M501T221_2	3.68847		0.926252	500.946	0.929991	0.968202	0.510721	0	1.001	0	0.0302928	0.09856
571					M187T96	1.5958		0.979078	187.107	0.929343	0.053833	0.106301	0	2.03835	-1.001	0.277039	0.0410025
1819					M370T445	7.4138		0.874146	370.189	0.929114	0.639292	0.408012	0	0.42446	0	0.0377452	0.217862
1269					M281T170	2.83719		0.986283	280.663	0.928588	0.47979	0.345779	0	0	1.001	0.0517979	0.137611
4721					M891T323_3	5.3787		0.844371	890.708	0.928445	0.0536175	0.106056	0	0.975774	1.001	0.159942	2.34525
2958			[495][M+3]2+		M552T479	7.99132		0.854439	551.815	0.928408	0.0165954	0.0551865	0	1.31864	1.001	0.203575	2.0667
747				[2M+H]+ 104.048	M209T51	0.853977	↓	0.746733	209.102	0.928229	0.0164866	0.0549916	0	1.43965	-0.512185	0.201189	1.37097
737				[M+Na]+ 184.121	M207T120	1.99906		0.894302	207.11	0.927899	0.0523399	0.104589	0	-0.774708	0	0.225709	0.126056
1943					M396T165	2.75596	↑	1.37965	396.155	0.927889	0.103065	0.151173	0	-0.884565	-1.001	0.191947	0.75932
4563			[827][M]3+		M841T323_1	5.37776		0.844218	841.114	0.926963	0.0352336	0.083886	0	0.944725	1.36637	0.168845	1.98548
1155				[M+NH4]+ 246.11	M264T218	3.64082		1.00979	264.144	0.926894	0.628131	0.403765	0	-1.00137	0	0.0733116	0.43705
810				[M+Na]+ 195.931	M219T19	0.308819	↓	0.762271	218.92	0.926857	0.0479306	0.0992866	0	-1.27844	-1.001	0.20973	0.167158
3875			[683][M]6+		M693T295_2	4.91424		0.891956	693.018	0.926777	0.0466549	0.0977296	0	1.00137	0	0.211445	2.40931
2101			[305][M+2]5+		M425T207_3	3.44774		1.09222	425.238	0.926421	0.137419	0.177149	0	-1.001	1.001	0.13088	0.612599
2726					M523T272_2	4.53589		0.841397	522.704	0.925315	0.0601408	0.113107	0	1.001	0	0.156504	0.274104
2131					M429T592	9.8638	↓	0.735738	429.373	0.925185	0.445528	0.332127	0	-1.46283	-0.168502	0.0141255	0.135593
4305			[767][M+4]7+		M767T309_3	5.1446		0.864278	766.964	0.925043	0.00141916	0.0157216	0	1.25787	1.001	0.344538	1.30108
3289					M606T292_1	4.85905		1.11634	606.141	0.924948	0.0193579	0.0599398	0	1.001	0	0.208371	0.588293
4538			[822][M+1]5+		M832T295_3	4.91027		0.928861	831.724	0.924487	0.155892	0.190113	0	-0.929109	0	0.147256	2.15287
1225					M274T147_1	2.45509		1.11787	273.655	0.924247	0.821346	0.469636	0	1.02695	0	0.0380587	0.125012
787					M215T75_2	1.25242		1.15982	215.175	0.924183	0.350497	0.291904	0	1.19374	-1.001	0.10209	0.647771
3345					M611T223	3.72064		1.16954	610.82	0.923759	0.172178	0.200436	0	1.41702	0	0.0924141	0.0410156
4214					M754T296	4.92523		0.883699	754.291	0.923708	0.0219935	0.0642688	0	1.001	0	0.263697	2.23659
1491			[195][M+2]+		M312T445	7.41297		0.916644	312.155	0.923596	0.931957	0.501184	0	-1.26419	0	0.0129599	0.619337
4540			[822][M+2]5+		M832T295_5	4.91035		0.899652	831.924	0.923437	0.134828	0.175211	0	0.996939	0	0.15317	2.389
3615					M653T192	3.20781		1.13121	652.806	0.923316	0.116587	0.16161	0	-1.00074	-1.001	0.203525	0.58692
1170				[M+H]+ 264.973	M266T228	3.79872	↓	0.787793	265.981	0.923024	0.0936959	0.143668	0	1.00103	0	0.1343	1.98857
2894			[482][M+1]4+		M547T302	5.03225		1.14281	546.542	0.922676	0.0933453	0.143405	0	1.16437	-1.001	0.1586	1.53388
992				[M+K]+ 203.873	M243T19	0.311932		0.939082	242.837	0.922348	0.622284	0.401516	0	-1.36866	0	0.0820785	1.18797
3131					M575T280_2	4.67186		0.939723	574.811	0.922273	0.906058	0.494139	0	0.761531	0	0.0147914	0.0743309
2825					M536T388	6.46316	↑	1.3034	536.334	0.92182	0.153006	0.188181	0	-1.001	0	0.159888	0.164309
4765					M913T282_1	4.69545	↑	1.22369	912.784	0.921789	0.0541926	0.106707	0	-1.00185	0	0.237456	0.00873132
995			[133][M+1]2+		M243T38	0.625327		0.880778	243.062	0.921462	0.0606223	0.1136	0	1.01613	0	0.213246	1.44271
3091			[529][M+1]+		M569T451	7.52496	↓	0.696668	569.343	0.921284	0.303902	0.269975	0	-1.02681	1.26694	0.0920729	0.0487112
1234					M276T160	2.67395	↑	2.00767	276.134	0.920969	0.844791	0.476652	0	-1.32723	-1.001	0.0337808	0.786691
2125			[313][M]5+		M429T277	4.60854		1.13902	428.633	0.920119	0.059708	0.112661	0	0.611533	1.001	0.155271	0.353207
987				[M+H]+ 241.142 [M+H-H2O]+ 259.153	M242T105	1.75818	↓	0.607082	242.15	0.9201	0.176813	0.203204	0	1.001	1.001	0.192346	0.538858
2834					M537T211	3.52067		0.880266	537.285	0.92009	0.146421	0.183647	0	-1.001	1.001	0.169811	0.487932
2355					M472T221_2	3.6779	↑	1.23856	471.769	0.920053	0.0287918	0.0748359	0	-1.001	0	0.234534	1.00512
2800			[464][M+2]5+		M532T206_2	3.42585		1.16248	531.889	0.919997	0.11884	0.163243	0	1.001	0	0.134489	0.159301
4664					M869T284_2	4.73265	↑	1.31818	869.449	0.919709	0.294428	0.265345	0	-0.453265	0	0.0988013	1.76865
4813			[887][M+1]3+		M924T294_3	4.90809		0.897551	924.139	0.919374	0.269102	0.252358	0	1.00126	0	0.110633	2.2713
2723			[447][M+1]7+		M522T273_2	4.54274		0.882277	522.418	0.919313	0.729797	0.44034	0	1.20153	0	0.0138569	0.0315938
2719					M522T308	5.12823		1.13676	522.293	0.918049	0.13204	0.173091	0	1.32496	0	0.151409	0.483635
2822			[467][M+1]+		M535T506	8.43605		0.86845	535.289	0.918022	0.446536	0.332542	0	1.00099	0	0.0601572	0.338572
2217			[331][M+1]2+		M446T220	3.67114		1.05531	445.74	0.917824	0.14338	0.181491	0	-1.001	0	0.134949	0.254502
1864					M381T22	0.360064		0.809948	381.079	0.917764	0.24838	0.241261	0	0.99494	0	0.106309	0.9688
2996			[505][M+1]6+		M556T271	4.50879		1.125	556.466	0.917617	0.0335868	0.0817202	0	0	0	0.197057	0.144127
2940			[493][M+1]3+		M550T275_1	4.58826		1.11714	549.628	0.916787	0.0349822	0.0835614	0	0.224946	0	0.148631	0.164774
2898					M547T293_1	4.88693		1.12655	547.291	0.916565	0.186897	0.208989	0	0.876535	0	0.105518	0.623462
1065			[141][M]+		M251T516	8.59716		1.10765	251.047	0.916378	0.186843	0.208959	0	0	0	0.157675	0.787838
2272					M456T171	2.84256		1.16588	456.281	0.916309	0.0425127	0.09246	0	-0.996669	0	0.215753	0.474369
3166			[545][M+4]6+		M583T287_1	4.7826		1.08532	582.642	0.916177	0.116723	0.161709	0	1.00227	0	0.104568	0.748032
2832			[473][M]+		M537T79	1.31028	↑	1.238	537.169	0.91612	0.358803	0.295573	0	1.001	0	0.121696	0.417302
2836			[474][M+1]7+		M538T295_2	4.92193		1.1116	537.858	0.915883	0.415461	0.319349	0	-1.0007	0	0.0714689	0.370617
3066					M563T231	3.85556		0.98669	563.295	0.915869	0.299208	0.267697	0	1.001	1.001	0.112371	0.542715
2374					M476T236_1	3.93837		1.19925	475.607	0.915798	0.0740992	0.127233	0	1.23737	1.001	0.182687	0.679691
1057					M250T74	1.23899	↑	1.23506	249.631	0.915519	0.00503563	0.0292071	0	1.41529	-1.001	0.213138	0.553273
1044					M249T79	1.31537		0.925581	249.054	0.915015	0.657134	0.414677	0	-1.02256	0	0.0260012	0.17589
2905					M548T293_3	4.88679		1.12718	547.959	0.914976	0.0868078	0.138308	0	1.00117	0	0.152137	0.100728
1903					M389T238	3.97075		0.898823	388.718	0.914566	0.968322	0.510752	0	-0.779036	0	0.0239659	0.523467
795			[110][M]+		M217T166	2.75858		1.13369	217.098	0.914352	0.116588	0.16161	0	-0.935802	0	0.126502	0.762039
2259					M454T231_1	3.84838		1.12356	453.508	0.913709	0.133721	0.174373	0	0	0	0.154582	0.745095
3536					M639T296_2	4.93704		0.887644	638.632	0.913198	0.0216109	0.0636597	0	0.375359	0	0.266011	2.26545
846					M222T117	1.94393		0.944213	222.112	0.911943	0.299102	0.267645	0	0.72413	0	0.0996058	0.720738
2126			[313][M+1]5+		M429T276	4.60788		1.1635	428.833	0.911485	0.0482986	0.0997439	0	1.71809	0	0.169673	0.0773551
1282					M281T104	1.7416	↑	1.5284	281.15	0.910545	0.27248	0.254116	0	1.08722	0	0.0577554	0.0103506
2645			[426][M+1]2+		M513T286_3	4.76418		0.884109	513.012	0.910516	0.387916	0.307827	0	1.00099	0	0.0399676	0.37021
3867			[680][M+1]6+		M692T295_3	4.92447		0.862661	691.852	0.910316	0.0478613	0.0992029	0	1.4282	0	0.239605	1.94315
2033			[296][M+4]7+		M411T205_5	3.41437		0.862438	411.077	0.909981	0.339965	0.287134	0	-0.935982	-1.001	0.0516254	0.296266
2961					M552T281_1	4.68933		1.1612	552.054	0.909965	0.0272898	0.0724845	0	-1.001	0	0.193235	0.404413
2277			[342][M+2]5+		M457T206_3	3.43958	↑	1.20394	457.045	0.90993	0.0205117	0.0618543	0	0	1.001	0.211646	0.199116
799					M217T392	6.53438		0.871597	217.122	0.909735	0.113512	0.159333	0	0.813088	0	0.165983	1.79435
3677					M660T289_10	4.82228		0.864771	660.208	0.909316	0.00944098	0.0403454	0	1.76348	0	0.280803	2.13047
2286					M460T465	7.75377		1.04299	460.232	0.909096	0.795734	0.461753	0	-1.00076	0	0.0273877	0.984715
59					M100T118	1.96191	↑	1.3012	100.112	0.909077	0.549999	0.372855	0	-1.18228	0	0.0451404	1.50782
1305					M285T86	1.43978		0.965589	285.083	0.908425	0.218769	0.225585	0	1.001	0	0.128247	0.844323
2793					M531T207_1	3.44788		1.07212	530.795	0.907927	0.241441	0.237753	0	-1.001	0	0.139934	0.336299
4016			[713][M+1]6+		M715T289_8	4.8147		0.817161	715.142	0.907825	0.0104673	0.0422341	0	-0.913344	0	0.218111	0.886362
3412			[600][M]8+		M621T207_1	3.44786		1.10174	621.193	0.907555	0.66465	0.41744	0	-1.10121	0	0.0759433	0.073373
3413			[600][M+1]8+		M621T207_2	3.45051		1.0738	621.319	0.907274	0.91676	0.497074	0	1.01049	0	0.0479979	0.552483
2619			[418][M+1]7+		M510T294_3	4.89467		1.05302	509.992	0.906797	0.433001	0.326898	0	-1.0926	1.36532	0.0776331	0.131205
112					M114T183	3.04614		0.806643	114.128	0.90659	0.0614898	0.114479	0	-1.27766	1.001	0.232023	0.427494
3532			[625][M+1]3+		M638T219_2	3.6469		1.04777	638.361	0.90655	0.447178	0.332806	0	0	1.001	0.0897875	0.625281
3895				[2M+H]+ 347.063	M695T38	0.639551		0.958937	695.134	0.905655	0.198257	0.215143	0	-1.00086	0	0.105923	0.346187
249					M137T44_1	0.730647		0.83711	137.203	0.905627	0.434151	0.327384	0	0	0	0.0804933	0.0523163
4354					M779T289_2	4.81365	↓	0.786856	779.244	0.905365	0.0210613	0.0627676	0	-1.00113	0	0.174744	1.32194
1357			[177][M+1]+		M294T49	0.816362	↑	1.29454	294.101	0.905289	0.0317915	0.0792483	0	0	1.38943	0.162236	0.813441
1582			[215][M+1]+		M330T43	0.719622	↓	0.795516	330.074	0.905247	0.777414	0.45597	0	-1.001	0	0.0561841	0.630476
2055			[299][M]2+		M415T392	6.52594		1.14936	415.139	0.904669	0.137237	0.177013	0	0.170666	0	0.169862	1.72046
233					M135T293	4.88312		0.897261	135.08	0.904289	0.563842	0.378352	0	-1.00105	1.001	0.0370276	1.12189
2000			[289][M]+	[M+Na]+ 384.215	M407T382	6.36728	↓	0.786782	407.204	0.904275	0.485061	0.347799	0	1.05097	0	0.0981333	0.250248
852				[M+H-H2O]+ 240.1	M223T357	5.95626	↓	0.594546	223.097	0.904182	0.0957958	0.145408	0	-0.768481	1.001	0.154317	0.696084
2340					M469T294	4.9		1.12015	469.394	0.903793	0.113093	0.159018	0	-0.985625	-0.476533	0.123752	0.0406702
2550					M501T297	4.94695		1.09129	500.605	0.903602	0.279715	0.257887	0	-1.06987	0	0.0580256	0.151066
2219			[329][M+1]+		M446T123	2.05826		1.17507	446.141	0.90359	0.00929157	0.0400516	0	1.26565	0	0.228132	0.496507
1427					M305T247	4.12239	↑	1.30683	305.215	0.903584	0.09856	0.147647	0	1.35558	-1.001	0.142289	0.464826
980			[132][M]+		M241T76	1.26715		0.839623	241.155	0.90354	0.0303984	0.0772449	0	0	1.308	0.180781	0.309702
557					M185T22_2	0.373494	↑	1.24312	185.128	0.903395	0.0875432	0.1389	0	-1.001	0	0.221764	0.299234
4780			[877][M+1]2+		M917T304_2	5.06789		0.848748	916.969	0.903113	0.0101503	0.0416736	0	-0.923937	0	0.190552	1.3265
3864			[679][M]3+		M692T296_2	4.93641		0.889665	691.601	0.903051	0.0383422	0.0877304	0	-0.979738	1.001	0.237645	2.39345
612					M192T23	0.379177		1.15807	192.032	0.902011	0.434634	0.327587	0	0.0360987	0	0.0744235	0.493061
2452			[377][M+3]5+		M486T282_4	4.70278		0.890322	486.452	0.901983	0.717288	0.436083	0	0.0760235	0	0.0156731	0.0248948
3473					M630T299_1	4.98808		0.962784	629.539	0.901951	0.62984	0.404419	0	-1.12448	0	0.0626337	0.405597
4428				[M+H]+ 796.309	M797T323_6	5.37754		0.856525	797.317	0.901848	0.0391476	0.0886781	0	-1.05304	0	0.195162	1.7264
2317					M466T191	3.18775		1.0119	465.92	0.901766	0.385325	0.306773	0	1.001	0	0.084604	0.359005
4345					M775T233	3.87886		0.948951	775.331	0.900764	0.592098	0.389627	0	0	0	0.0787268	0.771351
942				[M+Na]+ 214.121	M237T298	4.96754		0.907149	237.11	0.900343	0.100624	0.149281	0	1.26655	1.33446	0.108135	0.101619
3392			[593][M+4]6+		M618T288_4	4.80577		1.1359	618.001	0.900032	0.0422403	0.0921579	0	-1.001	-1.001	0.147702	0.94427
1687					M346T186	3.09383	↑	1.59084	346.197	0.899766	0.122455	0.165801	0	0.562821	-1.001	0.0802979	0.494386
2140			[314][M+2]3+		M431T235_3	3.91265		1.1471	431.227	0.899305	0.16121	0.19359	0	1.00041	-1.001	0.089137	0.195717
25			[4][M]+		M86T68	1.13887		0.871905	86.0973	0.898762	0.0798457	0.132446	0	-1.17788	1.43941	0.173754	0.537978
1604					M333T177	2.95001	↑	1.20928	333.178	0.898754	0.101502	0.149966	0	-0.592043	0	0.175453	0.719972
3174					M583T246_2	4.10815	↑	1.28067	583.309	0.898252	0.231068	0.232325	0	0	1.001	0.118576	0.733001
200			[26][M]+	[M+H]+ 129.079 [M+H-H2O]+ 147.089	M130T35	0.583477		0.957476	130.086	0.89803	0.574058	0.382337	0	1.001	-1.001	0.0846149	2.64825
2450			[377][M+2]5+		M486T282_3	4.70612		0.860086	486.251	0.897961	0.313124	0.274368	0	-1.00087	0	0.0626415	0.235026
3407			[598][M+1]3+		M619T229_2	3.81512		1.14845	619.354	0.897878	0.138938	0.17827	0	-1.001	0	0.14594	0.36852
333					M149T408	6.79879	↓	0.775466	149.096	0.89777	0.0782355	0.131022	0	1.001	0	0.126963	0.739165
1310			[170][M]+		M286T292	4.86721	↑	1.23582	286.202	0.897501	0.0643389	0.117485	0	1.19928	0	0.148035	0.231402
4157					M742T292	4.87325		0.881593	742.387	0.897434	0.0238711	0.0672008	0	1.04529	-1.001	0.208175	0.406661
60					M100T99_1	1.65326		1.08656	100.211	0.897128	0.195854	0.213872	0	0.513254	0	0.125494	0.918213
1608					M334T126	2.09969		0.860312	334.14	0.896158	0.623388	0.401941	0	-1.0137	0	0.0298908	0.344903
4874			[901][M+1]3+		M953T288	4.80752		0.827035	952.858	0.895765	0.0529295	0.10527	0	1.12203	0	0.134977	1.59391
721					M205T129_2	2.14515		0.863204	205.48	0.895647	0.420943	0.321737	0	-1.4223	0	0.120647	0.58464
1295					M283T86	1.43531	↑	1.93158	283.129	0.895339	0.392477	0.309666	0	0	0	0.0365984	0.485814
4619					M855T334	5.56369		0.820973	855.35	0.895292	0.0107471	0.0427131	0	-1.06862	0	0.196125	1.62807
2084					M422T190_2	3.16926	↑	1.42041	422.24	0.895138	0.654425	0.413675	0	0.0379924	-1.001	0.011483	0.753877
2795					M531T207_2	3.44469		1.06744	531.045	0.894976	0.218191	0.22526	0	0.262867	-1.001	0.147251	0.723548
3621					M655T39	0.652131	↑	1.22882	655.154	0.894923	0.121689	0.165266	0	-0.861277	1.001	0.14609	0.716712
400					M162T23	0.387518		0.954321	162.076	0.894763	0.503274	0.354624	0	0.716031	0	0.0814296	0.775134
4824			[890][M+1]3+		M926T303_2	5.04698		0.844305	926.474	0.894035	0.00809255	0.0374957	0	-1.41377	1.001	0.213993	1.72449
2191					M440T94	1.57293		0.837537	440.211	0.893929	0.0096388	0.0407266	0	-1.15437	1.001	0.212318	0.932914
963					M239T83	1.37713		0.863899	239.102	0.893703	0.102418	0.150676	0	-1.001	0	0.174138	1.25597
4221				[M+H+H2O]+ 735.639	M755T295_1	4.9137		0.875167	754.656	0.893474	0.0900056	0.140847	0	1.2959	0	0.197746	2.43815
1841					M376T167	2.77844		0.925431	375.873	0.893407	0.553182	0.374129	0	-1.001	0	0.0254938	0.135317
2476			[380][M+1]+		M489T91	1.51243	↑	1.22467	489.238	0.893291	0.0819637	0.13428	0	-1.15105	-1.001	0.185756	0.587104
4570			[827][M+1]3+		M841T322	5.3663		0.845236	841.448	0.893176	0.0918635	0.142282	0	1.36522	0	0.147776	2.0014
3					M61T49	0.815298	↑	1.28439	61.0395	0.893066	0.0285364	0.0744427	0	1.38751	0.312229	0.281119	1.13416
75					M105T466	7.75917		0.822903	105.034	0.892818	0.245838	0.239987	0	-1.00098	0	0.0714464	0.536972
2636					M512T150	2.49469		1.16243	512.072	0.892279	0.0160777	0.0542484	0	0.922396	0.433223	0.230767	0.537773
2327					M468T269	4.47579		0.890397	467.588	0.89195	0.685746	0.425058	0	0	0	0.0298486	0.560857
3006			[509][M]6+		M558T275_1	4.58653		1.1746	557.623	0.89173	0.0185993	0.0587004	0	-1.001	-1.001	0.224717	0.459736
1090					M255T21	0.357885	↑	1.25482	255.107	0.891493	0.0154503	0.053074	0	-1.41172	0	0.2097	0.0944913
2321					M466T23	0.384491		1.10979	466.133	0.891439	0.158472	0.191814	0	1.2627	1.001	0.160516	0.413548
940			[129][M+1]+		M237T373	6.21453		1.0883	237.077	0.891348	0.173074	0.200976	0	-0.292708	0	0.105137	0.16541
823			[114][M+1]+		M220T373	6.21558		1.02567	220.051	0.891093	0.242355	0.238221	0	1.001	-1.001	0.0953855	0.0742242
2158			[317][M+1]2+		M434T118_2	1.96358		1.12538	434.259	0.890923	0.0838135	0.135844	0	0.109896	1.001	0.170342	0.581707
4506					M823T313_4	5.22398		0.824544	823.449	0.890773	0.00063227	0.0107347	0	0.896852	0.643269	0.262351	0.289298
2538			[398][M+3]7+		M499T287_4	4.78325		1.11318	499.408	0.890544	0.211425	0.221836	0	1.04788	0	0.0779969	0.78952
1231					M276T74	1.23562		0.87486	275.567	0.8903	0.0323891	0.0800844	0	1.001	1.001	0.185251	0.710551
4268			[763][M]3+		M760T333_2	5.55796	↓	0.777651	760.424	0.890111	0.187514	0.209333	0	1.001	0	0.105839	0.698293
4472			[805][M+2]+		M813T392	6.52517		0.873983	813.314	0.889201	0.016366	0.0547742	0	-0.0588784	0	0.209725	1.94547
1526			[201][M+2]3+		M319T134_2	2.23726	↑	1.22232	318.843	0.888148	0.312642	0.274141	0	1.05411	1.001	0.0638019	0.740733
1210			[159][M]+		M270T544	9.06344		1.08286	270.279	0.887806	0.107829	0.15497	0	0	-1.001	0.130788	0.765743
1904			[267][M]5+		M389T241_1	4.011		0.912693	388.814	0.887796	0.980837	0.51396	0	0	1.001	0.00221454	0.487464
2231			[333][M]6+		M448T279_1	4.64629		1.15558	447.738	0.887795	0.0683584	0.121645	0	-0.571202	0	0.121344	0.123203
1482					M311T53	0.891309		0.830345	311.123	0.886997	0.190406	0.21093	0	1.00102	0	0.0688792	0.503213
1203				[M+H]+ 268.24	M269T473	7.88068	↑	1.24343	269.248	0.886354	0.0514544	0.103555	0	-1.001	-1.001	0.179299	0.605394
190					M129T16	0.273906	↑	1.21752	129.139	0.886332	0.234997	0.234408	0	0	0	0.0868256	1.55986
2298					M463T24	0.404425		1.14345	463.088	0.885716	0.212055	0.222146	0	-1.001	0	0.0915259	0.883853
3442					M625T293_3	4.87665		0.845908	624.686	0.885507	0.0623022	0.115292	0	1.00162	1.001	0.157704	0.39779
3530					M638T307_4	5.11124		1.08687	638.165	0.884975	0.108528	0.155517	0	0	1.001	0.145716	0.155683
219					M132T69_2	1.15533		1.14061	132.41	0.884846	0.303944	0.269995	0	1.0006	0	0.0634085	0.925231
1087					M254T122	2.03745	↑	1.3683	254.121	0.884511	0.204909	0.21858	0	0.740341	0	0.0787885	0.56606
1177					M267T91_1	1.51494		0.823091	267.082	0.884511	0.108001	0.155105	0	0.987369	0	0.109043	0.0451147
712					M205T247	4.10982		0.834627	205.074	0.884117	0.0859964	0.137648	0	-0.538178	0	0.150821	0.897916
2721	L-A-LysoPC; 18:1		[448][M]+	[M+H]+ 521.348	M522T480	7.99684	↓	0.773425	522.357	0.883999	0.0442833	0.0947402	0	-1.001	0	0.205833	1.98158
1116					M259T428	7.1367	↓	0.762732	259.169	0.883674	0.104286	0.152142	0	-1.001	0	0.175862	1.00838
78					M105T95_2	1.57895		0.87932	105.07	0.883564	0.0221829	0.0645666	0	1.41688	-0.0966384	0.192374	0.25486
570				[M+H-H2O]+ 204.1	M187T144	2.39541		0.876327	187.096	0.883409	0.131794	0.172902	0	1.001	0	0.101759	2.1432
2963					M552T259	4.31706		1.17055	552.306	0.883382	0.173135	0.201013	0	0.676446	0	0.118232	1.34358
3619					M654T178	2.95913		1.19908	654.208	0.883099	0.0245017	0.0681517	0	1.86714	-1.001	0.267742	0.292696
2157					M434T264	4.4038		0.865997	434.245	0.882779	0.255787	0.245235	0	-0.468034	0	0.0976379	0.282064
1074					M251T82	1.36891		1.19876	251.496	0.882776	0.192336	0.211981	0	1.0778	1.001	0.120137	1.1637
4155					M742T293_2	4.88751		0.833024	742.274	0.882691	0.0060248	0.0322032	0	1.34396	-0.41686	0.24113	1.18451
491				[M+H+H2O]+ 155.131 [M+H]+ 173.141	M174T73	1.22003		1.18855	174.149	0.882448	0.0240301	0.0674428	0	0	0	0.227666	0.242771
440					M166T95_4	1.57869	↓	0.760996	166.479	0.882182	0.952851	0.506727	0	-1.09644	0	0.0175014	1.09854
879					M228T110	1.8386		0.901619	228.134	0.881425	0.88267	0.487603	0	-1.001	0	0.0107966	0.717956
4128			[734][M]6+		M737T296_1	4.93936		0.863067	737.053	0.881285	0.00698393	0.0347665	0	0	1.001	0.310109	0.273851
821					M220T74	1.23634		0.96875	219.712	0.881276	0.971784	0.511644	0	-0.980525	0	0.0693113	1.35717
597					M190T319	5.31275		0.921252	190.087	0.881167	0.704704	0.431736	0	0.849399	-1.001	0.0900188	0.0462712
2546					M500T297_3	4.94219		1.09007	500.271	0.881107	0.406802	0.315665	0	1.001	0	0.0537814	0.639195
4799			[884][M+1]3+		M922T302_3	5.03662		0.862968	922.249	0.880394	0.0386905	0.0881425	0	1.001	0	0.16322	1.43578
2763			[458][M]2+		M528T148	2.47427		1.08646	527.798	0.880263	0.0705216	0.123798	0	1.3298	0	0.14931	0.258578
393					M161T394	6.57281		0.803856	161.096	0.880176	0.29299	0.264631	0	-1.001	0	0.0905235	0.550817
1271					M281T82	1.36145		1.19765	280.822	0.879701	0.285231	0.260723	0	1.0633	0	0.0610195	1.51324
4732					M894T308_2	5.1314		0.856803	893.958	0.879322	0.0233755	0.066437	0	1.87736	0	0.188418	1.3357
4541					M832T295_6	4.91361		0.915393	832.024	0.879211	0.151264	0.186999	0	-0.36457	0	0.140808	2.00608
1870			[258][M+1]+		M384T33	0.546185	↑	1.24095	384.078	0.879161	0.298146	0.267177	0	0.941623	0	0.146248	0.166262
2575			[406][M+2]3+		M504T258_3	4.2999		1.1735	504.284	0.878573	0.0269365	0.0719305	0	-1.001	0	0.235116	0.505743
4667					M870T284_2	4.73266	↑	1.28405	869.95	0.87855	0.367351	0.299267	0	-1.00099	0	0.10089	1.97481
2522					M497T244	4.07388	↑	1.41615	497.239	0.878472	0.0644972	0.117652	0	1.06444	0	0.199274	1.0207
3872					M692T296_5	4.93804		0.895312	692.102	0.87832	0.0582321	0.111117	0	-1.02746	-1.001	0.246764	1.47024
1242			[164][M+1]+		M277T78	1.29638		0.943811	277.147	0.877892	0.900722	0.492662	0	1.001	-1.001	0.00505083	1.21183
3887					M694T295_5	4.92141		0.88395	693.854	0.877413	0.0140166	0.0502242	0	-1.21788	0.358409	0.266022	1.10921
4768					M913T282_3	4.69961	↑	1.23038	913.118	0.877352	0.0589118	0.111832	0	-1.001	0	0.234951	0.105539
4258					M759T536	8.92709	↓	0.794287	758.571	0.877293	0.143405	0.181509	0	-1.001	-1.36752	0.110163	1.62664
4286					M765T295	4.91885		0.917563	765.287	0.877241	0.090654	0.141351	0	1.001	0	0.229634	2.10471
606					M191T22	0.362415	↓	0.76614	191.102	0.876798	0.284384	0.26029	0	0	0	0.0813203	0.405438
2957					M552T289_1	4.8109		1.09688	551.792	0.876284	0.106796	0.154155	0	-1.001	0	0.167067	0.785203
2714			[444][M+1]+		M521T454	7.56902	↓	0.785915	521.344	0.876283	0.507734	0.356363	0	-1.001	0	0.058814	0.539682
830			[114][M+2]+		M221T373	6.21571		1.00695	221.046	0.87628	0.159844	0.192708	0	-1.001	-0.520089	0.122617	1.06202
2110					M427T241	4.01903		0.94238	426.732	0.876196	0.429691	0.325494	0	-0.955825	0	0.0817333	0.297908
1956					M399T104	1.73749		1.03313	398.713	0.876066	0.692433	0.427431	0	-1.001	1.001	0.0649601	0.349655
1502					M314T156_3	2.6043		1.13439	314.171	0.875633	0.0245188	0.0681772	0	1.001	0	0.186466	0.408511
2112			[310][M]+		M427T22	0.372753		1.07072	427.095	0.875627	0.179614	0.204843	0	1.001	0	0.165826	0.999395
1320					M288T155	2.57658		0.970966	288.203	0.875526	0.572355	0.381677	0	-1.001	0	0.038935	0.020778
295			[38][M+1]+		M145T165	2.75428	↓	0.695001	145.084	0.87538	0.122256	0.165662	0	-1.001	0	0.154473	1.12394
4543					M832T295_8	4.92137		0.876789	832.224	0.875194	0.11557	0.160864	0	-1.001	0	0.154389	1.2726
4402			[791][M]7+		M794T304_1	5.06762		0.827755	793.688	0.874985	0.0196996	0.0604829	0	1.66245	1.001	0.20621	1.62072
2305					M464T289_3	4.82125		1.10918	463.877	0.87463	0.232643	0.233164	0	1.00099	0	0.0833125	0.463924
3863					M692T296_1	4.94071		0.8744	691.517	0.874211	0.00554634	0.030815	0	0.682891	1.001	0.330367	2.18889
2127			[312][M+1]3+		M429T155_2	2.58092		1.18832	428.916	0.873761	0.0157195	0.0535832	0	1.04131	0	0.25322	0.997968
3213			[556][M+4]6+		M592T316	5.2663		1.15469	591.66	0.873706	0.00637941	0.033166	0	-0.893892	1.41121	0.24026	0.890705
1631			[221][M+3]2+		M337T480	7.99364		0.824495	337.164	0.873593	0.0866805	0.138205	0	-1.001	0	0.120368	0.633803
2889			[482][M]4+		M546T302_2	5.03112		1.13409	546.292	0.873462	0.147663	0.184515	0	0.638716	0	0.133964	0.275734
1076			[142][M+1]+		M252T256	4.26487		1.00937	252.188	0.872645	0.59715	0.39165	0	-0.96587	0	0.0348559	0.351472
1267					M280T81	1.35671		1.18974	280.488	0.872645	0.445703	0.332199	0	1.001	0	0.033294	1.68512
2107					M426T60	1.00746	↑	1.20334	426.15	0.872545	0.0372186	0.0863759	0	1.0135	0	0.218919	0.742276
2693			[440][M+1]3+		M519T281_2	4.68986		1.10729	518.925	0.872406	0.144652	0.182397	0	0	0	0.0854226	0.0683307
2253					M452T251_1	4.19095		1.1137	451.887	0.872047	0.516435	0.359738	0	0	1.001	0.0993597	0.469907
1566			[209][M+1]+		M328T450	7.49301		0.965589	328.081	0.871554	0.360251	0.296205	0	0.238601	-0.170179	0.108315	0.549234
4296					M766T279	4.65766		0.89523	766.081	0.871219	0.23608	0.234976	0	-0.973474	0	0.111552	0.690261
2297					M462T213	3.55769		1.08585	462.014	0.871125	0.442626	0.330927	0	1.40343	0	0.0517381	1.39229
4153					M742T289	4.82245		0.862637	741.6	0.871051	0.0706764	0.12395	0	1.17057	0	0.185068	0.962313
3034					M560T313_2	5.21473		1.07535	560.472	0.87105	0.0992405	0.148189	0	1.00253	0	0.149912	0.179789
3437					M624T293_2	4.87692		0.845597	624.413	0.871046	0.0104108	0.0421358	0	1.13367	1.001	0.23007	0.780531
2615					M510T294_1	4.89361		1.07001	509.706	0.871043	0.237416	0.235674	0	-0.23236	0	0.124225	0.0774589
2587					M505T293_2	4.87848		1.13295	505.284	0.870959	0.113618	0.159412	0	-0.34777	0	0.161511	0.220671
3021					M559T292_2	4.87123		1.02605	559.465	0.870915	0.498922	0.353014	0	-0.992134	0	0.0859924	0.684533
2064					M417T166	2.77398		1.17048	417.003	0.870739	0.0273291	0.0725457	0	-1.2711	0.447303	0.27214	0.0541945
2366					M474T465	7.7536		1.06628	474.248	0.870567	0.525743	0.363292	0	-1.36599	0	0.00723106	0.957344
1521					M318T232	3.86795		1.08458	318.181	0.870344	0.636142	0.406819	0	-1.20876	0	0.0169052	0.252409
1587			[217][M]5+		M331T150_1	2.50006	↑	1.22515	331	0.87023	0.0893842	0.140361	0	0.0348642	0	0.203523	0.415222
212			[26][M+1]+		M131T35	0.589244	↓	0.745185	131.089	0.870188	0.0699523	0.123237	0	-1.05853	0.680151	0.161498	0.135346
1535				[M+Na]+ 298.152	M321T104	1.73424		0.901369	321.142	0.869982	0.0318942	0.0793929	0	-0.884102	0	0.162429	0.870179
3531					M638T307_5	5.11124		1.07586	638.331	0.869859	0.0917608	0.142203	0	-0.580104	1.001	0.143436	0.559245
615	N-acetylmethionine	reported	[86][M]+		M192T140	2.33646	↑	1.34491	192.069	0.869845	0.0180908	0.0578426	0.0400153	1.38091	1.001	0.21756	0.0657491
1321					M288T75_2	1.25761	↑	2.00261	288.203	0.869817	0.818548	0.468786	0	0.935905	0	0.0770961	0.252284
439					M166T95_3	1.57811		1.02809	166.431	0.869426	0.697341	0.429161	0	1.3743	0	0.020244	0.631776
2937			[491][M+5]6+		M549T313_5	5.22175		1.10643	549.301	0.869411	0.15186	0.187404	0	-0.561002	0	0.138541	0.612182
1372					M295T136	2.26695	↑	1.78799	295.129	0.869285	0.498055	0.352692	0	1.001	0	0.0412911	0.355577
1879			[264][M]3+		M385T172	2.86433		1.03939	385.223	0.86898	0.348895	0.291187	0	-0.790946	0	0.0827722	0.568704
2473			[383][M]7+		M489T288_2	4.80328		1.09088	489.116	0.868487	0.252619	0.243494	0	-1.00475	-1.001	0.115777	0.596623
90				[M+H+H2O]+ 88.0522 [M+H]+ 106.063	M107T268	4.46919	↑	1.63542	107.07	0.868047	0.710047	0.43359	0	0.0960188	0	0.0738536	1.0884
1190					M269T157	2.61844	↑	1.27994	268.657	0.867702	0.426058	0.323942	0	0	0	0.104914	0.383659
57				[M+H]+ 99.0686	M100T100	1.65901		1.03211	100.077	0.867539	0.179761	0.204928	0	0.432268	-0.447303	0.127573	0.0837412
4668					M870T284_3	4.73455	↑	1.2215	870.2	0.867466	0.204075	0.218156	0	0	1.41055	0.118362	1.28571
2175			[322][M]3+		M438T203_1	3.38429	↑	1.30895	437.913	0.867156	0.082861	0.135043	0	1.12948	1.001	0.157804	1.5708
3882					M693T295_7	4.91361		0.915742	693.437	0.866813	0.136384	0.176378	0	1.68756	0	0.164668	2.12703
2895			[485][M]3+		M547T243_1	4.05488	↑	1.63915	546.629	0.866477	0.308233	0.272053	0	-0.979194	0	0.074125	0.703672
3364			[588][M]+		M613T51	0.850886	↑	1.2116	613.16	0.866193	0.199256	0.215667	0	2.04099	0	0.188164	0.0458293
250					M137T44_2	0.733713		0.864127	137.36	0.86614	0.785579	0.458563	0	1.001	1.001	0.0307823	0.68383
3394			[593][M+5]6+		M618T288_5	4.80661		1.1321	618.168	0.86492	0.0366609	0.0856891	0	0.53818	0	0.16636	0.904506
4094					M730T317_2	5.28885		1.09237	729.802	0.86479	0.0599664	0.112927	0	-1.001	0	0.127566	1.52543
2666			[431][M]7+		M516T288_1	4.8043		1.0879	515.563	0.864682	0.268923	0.252264	0	1.001	0	0.0668494	1.41929
4571			[828][M+1]3+		M842T322_1	5.36315		0.860221	841.503	0.86456	0.067493	0.120767	0	1.23829	0	0.154236	1.8541
1844			[254][M+1]+		M376T131	2.18114		0.854799	376.226	0.86427	0.0102299	0.0418163	0	1.00089	0	0.249304	0.160335
3819			[671][M+1]5+		M687T293_2	4.87846		0.82234	686.855	0.864169	0.0194892	0.0601495	0	1.001	0	0.200117	0.2188
3883					M694T295_1	4.91027		0.91094	693.52	0.864013	0.120462	0.1644	0	1.02883	0	0.169072	2.26626
1465					M310T158_1	2.63139		1.11032	309.675	0.863792	0.852381	0.478883	0	-1.48491	0	0.0360431	0.032605
2616			[418][M]7+		M510T294_2	4.89698		1.04187	509.849	0.863751	0.515124	0.359233	0	-1.00129	-1.001	0.0665314	0.348081
1067					M251T103	1.71706		0.841807	251.077	0.863576	0.152984	0.188166	0	-1.001	-1.001	0.132002	0.126495
1165	Phe-Val				M265T151	2.5143	↑	1.62749	265.154	0.863537	0.0639751	0.117097	0	0.511738	-0.642213	0.168796	0.267058
1861				[M+Na]+ 357.189	M380T81	1.34307		1.17966	380.177	0.862925	0.124858	0.167462	0	1.04358	0	0.173857	0.529415
2663					M515T288_1	4.80631		1.07151	515.133	0.862567	0.201519	0.216844	0	-1.001	0	0.083704	0.812614
628					M193T420	6.99552		0.872467	193.122	0.862499	0.122528	0.165852	0	1.001	0	0.182725	1.03396
2728			[449][M]4+		M523T308_2	5.12846		1.12151	522.795	0.862446	0.210646	0.221453	0	-1.00045	0	0.123042	0.373405
1224					M273T256	4.26621		0.855378	273.167	0.862341	0.787372	0.459129	0	1.00209	-1.001	0.0144476	0.00521349
256					M138T239	3.98464		0.82672	138.055	0.86227	0.0816028	0.133971	0	1.00178	1.2042	0.126118	1.18416
3415					M621T207_3	3.45218		1.09662	621.444	0.862221	0.930562	0.500809	0	1.01908	0	0.0542128	0.318253
2620					M510T204	3.40288		0.884521	510.099	0.862154	0.912746	0.495977	0	-1.00097	1.001	0.00555455	0.118111
1834					M374T70	1.16226		0.901512	374.239	0.862102	0.114962	0.160414	0	1.001	0	0.167997	2.4843
1331					M290T42	0.700882		1.1207	290.134	0.861905	0.299791	0.267982	0	-0.942513	0	0.0359555	0.569953
4778			[879][M]2+		M917T305_1	5.08462		0.864349	916.799	0.861786	0.00997348	0.0413524	0	-0.489043	-1.001	0.191884	2.17313
1409			[184][M]2+		M302T373	6.21527		1.0923	302.037	0.86171	0.162679	0.194532	0	-1.05132	-1.001	0.127253	0.604503
1030					M247T71	1.18211		0.990055	247.129	0.861665	0.221275	0.226987	0	-0.973329	0	0.12962	0.658488
3527					M638T307_3	5.11124		1.0874	637.998	0.861626	0.139157	0.178431	0	-1.001	0	0.133227	0.068417
1752			[237][M+1]+		M358T22_2	0.374229		0.837916	358.252	0.86132	0.621542	0.401229	0	-1.00217	0	0.0525486	1.0787
2773			[460][M]4+		M529T158_1	2.63136		0.891261	529.025	0.860747	0.933259	0.501533	0	-1.31173	0	0.0600894	1.59136
4873			[902][M]3+		M953T289_3	4.82228		0.836944	952.744	0.860326	0.072048	0.125282	0	-1.38307	0	0.127489	1.89981
3816			[671][M]5+		M687T293_1	4.87819		0.85688	686.654	0.860304	0.00960269	0.0406577	0	1.00004	0	0.252121	0.478937
2170					M438T206	3.42574		0.932966	437.515	0.859584	0.720439	0.437162	0	-1.001	0	0.0377503	0.48218
1523			[203][M]3+		M319T95_1	1.58139		0.893701	318.502	0.85869	0.531837	0.365588	0	1.001	0.174654	0.0669636	1.29297
1337					M291T19	0.315946	↓	0.666243	290.855	0.858539	0.378071	0.303785	0	1.0005	0	0.114393	0.157081
437			[65][M]+		M166T335	5.58199		1.12204	166.087	0.858441	0.469709	0.341857	0	-0.690013	0	0.12452	0.222075
1483					M311T88	1.46736	↑	1.37986	311.124	0.858143	0.534875	0.366724	0	-1.00103	-1.001	0.0237421	0.361276
806			[110][M+1]+		M218T166	2.75858		1.09743	218.1	0.858077	0.193097	0.212394	0	0.994703	0	0.100465	0.340268
2681					M518T134	2.23368		1.15302	517.73	0.857809	0.269789	0.252717	0	0.409871	0	0.140918	0.0687411
3424			[602][M+1]7+		M622T298_2	4.96515		1.10795	622.468	0.857307	0.0758146	0.128827	0	1.0005	0	0.16058	0.411953
4384			[785][M+3]7+		M786T304_5	5.07122		0.861605	786.401	0.857076	0.0227851	0.0655079	0	1.001	0	0.211411	1.62706
2623			[416][M+1]+		M510T392	6.52644		1.15117	510.231	0.856974	0.1681	0.19794	0	1.00099	1.001	0.125336	2.55474
4527			[820][M+1]5+		M830T302_3	5.03146		0.852099	829.923	0.856864	0.120575	0.16448	0	0	0	0.172785	0.187782
2680			[435][M]4+		M518T312_1	5.20509		1.13392	517.549	0.856179	0.0934484	0.143482	0	-1.71681	0	0.205765	0.781597
3541					M639T296_4	4.9332		0.888275	638.864	0.855647	0.0179247	0.0575574	0	-1.33213	1.001	0.255025	0.71706
384			[52][M+1]+		M160T128_2	2.13896	↓	0.76153	160.095	0.85554	0.0946509	0.144463	0	0	1.39351	0.154221	0.553047
412					M163T476	7.9277	↓	0.788827	163.112	0.855143	0.264499	0.249931	0	-0.895121	1.001	0.165478	2.58377
396			[54][M+1]+		M161T183	3.04357		0.836199	161.136	0.855086	0.0452861	0.0960196	0	0.194434	0	0.247627	0.165918
3273			[568][M+2]+		M603T153	2.5572		1.03566	603.325	0.854817	0.209049	0.220662	0	0	0	0.10122	0.788322
2442					M485T197_2	3.27507		0.967401	485.247	0.854025	0.986238	0.515332	0	0	0	0.00465908	0.131429
1993					M405T147	2.44205	↑	1.40691	405.471	0.85377	0.0550181	0.107631	0	1.49114	2.00535	0.190043	0.655335
1871			[259][M]+		M384T110	1.84078		1.1235	384.115	0.853685	0.384852	0.30658	0	1.001	0	0.0813386	0.170312
3044			[519][M+1]6+		M561T313_4	5.21318		1.07213	561.14	0.853388	0.0667964	0.120054	0	-0.853792	-1.001	0.165495	1.07421
1697					M348T23	0.378202		1.06286	348.07	0.853266	0.413764	0.318632	0	-0.982787	0	0.0778668	0.101229
1745			[237][M]+		M357T23	0.376304	↓	0.788696	357.249	0.853211	0.640706	0.408546	0	1.00105	0	0.0497792	0.365761
2073			[301][M+1]+		M419T94	1.56866		0.819957	419.232	0.852679	0.573453	0.382103	0	1.00038	0	0.0455236	0.382712
1463					M309T301	5.01301		1.08885	309.228	0.85263	0.181812	0.206111	0	-1.22492	0	0.134477	0.345879
2673					M517T134_1	2.23473		1.1664	516.728	0.8525	0.331404	0.283156	0	0.996769	-1.001	0.13722	0.0269504
2682			[435][M+1]4+		M518T312_2	5.20321		1.13579	517.8	0.852488	0.100704	0.149343	0	-1.001	0	0.198194	0.702737
3319			[578][M]3+		M608T264	4.39908		0.871349	608.344	0.852432	0.448525	0.333358	0	0	0	0.0707096	0.186242
1460					M309T158	2.63274		1.08646	309.174	0.852236	0.797813	0.462402	0	-1.00092	0	0.0445161	0.163589
71					M104T22	0.362638	↓	0.708118	104.071	0.851898	0.517351	0.36009	0	1.01418	0	0.0595683	0.26903
3721			[653][M+2]5+		M668T293_5	4.88412		0.849587	668.448	0.851859	0.0063302	0.0330355	0	-1.06148	0	0.254442	0.127658
3227					M595T294_4	4.89665		1.07412	595.158	0.851855	0.244389	0.239255	0	1.05895	0	0.0884086	0.0337402
2480					M489T289_2	4.81609		1.08713	489.403	0.851282	0.191005	0.211257	0	-1.54656	0	0.127818	0.278095
923			[127][M+2]+		M233T141	2.34698	↑	1.24776	233.176	0.851223	0.360041	0.296113	0	-1.001	1.001	0.0287421	0.291875
3478			[612][M+1]8+		M630T311_2	5.18118		0.870066	630.086	0.851178	0.0550814	0.107701	0	-1.001	0	0.181566	1.21048
4410					M794T304_6	5.06773		0.829369	794.405	0.850819	0.0200451	0.0610618	0	1.00142	0	0.206234	1.85094
3439			[605][M]6+		M625T320	5.32599		1.18793	624.511	0.850753	0.139447	0.178644	0	-0.7588	0	0.145284	0.285806
4342			[776][M+1]5+		M775T295_3	4.92223		0.885257	774.702	0.850238	0.0532882	0.105681	0	1.19184	-1.001	0.251276	1.62263
2610			[416][M]+		M509T392	6.52649		1.15606	509.228	0.850076	0.191964	0.21178	0	1.001	0	0.120856	2.29319
1118					M260T78	1.29332		1.12781	259.644	0.849738	0.757374	0.449499	0	1.001	0	0.0464771	0.206659
2730			[449][M+1]4+		M523T308_3	5.13013		1.12258	523.045	0.849131	0.159231	0.192309	0	1.001	0.760379	0.142996	0.504147
4338					M774T295	4.92441		0.881136	774.401	0.848526	0.078514	0.13127	0	0	-1.001	0.248776	2.36133
3117			[535][M+4]6+		M573T313_2	5.22238		1.11598	572.813	0.847771	0.0165849	0.0551679	0	1.0133	-1.001	0.15688	0.0771443
3099					M570T288	4.80024		1.11303	570.468	0.84743	0.0839936	0.135995	0	-1.0149	0	0.1515	0.864115
2257			[340][M]3+		M453T221	3.68976		0.982661	453.234	0.847234	0.910879	0.495465	0	1.001	-1.001	0.00674469	0.202816
2533			[398][M+1]7+		M499T287_2	4.78359		1.10784	499.122	0.846997	0.244105	0.239111	0	1.12939	0	0.0658469	0.948909
406					M163T144	2.40291		0.818813	163.042	0.846953	0.102734	0.150919	0	-0.998024	-1.001	0.174856	0.398718
1932					M394T173	2.87634	↑	1.20055	393.883	0.846838	0.133123	0.173918	0	1.00132	1.001	0.151583	0.60623
2865					M542T44	0.733366	↑	1.25743	542.084	0.846609	0.0918256	0.142253	0	1.00722	0	0.173866	0.560226
1068					M251T76	1.2691		1.08822	251.106	0.845546	0.454067	0.335616	0	1.01762	0	0.0343937	0.166657
601					M191T18	0.294678		1.12075	190.912	0.845359	0.477622	0.344942	0	-0.860868	1.001	0.0237028	0.685735
1713					M352T204	3.39576	↑	2.44678	351.699	0.845036	0.18511	0.207987	0	0	1.001	0.0587425	0.26505
1046					M249T225	3.74855		0.895708	249.109	0.844879	0.281647	0.258885	0	-0.644757	0	0.145422	0.358202
1448					M308T134	2.24083		0.996264	308.091	0.844798	0.502324	0.354273	0	0	0	0.114023	0.301829
594					M190T148	2.46985		0.83172	190.05	0.843714	0.200552	0.216342	0	0	0	0.121842	0.00949459
2469			[382][M+1]7+		M489T288_1	4.80495		1.0817	488.973	0.84366	0.397465	0.311653	0	1.001	1.001	0.0752919	0.618659
4234					M756T295_4	4.91279		0.920378	756.203	0.843513	0.203515	0.21787	0	1.00107	0	0.143738	2.36944
2299					M463T289_1	4.81021		1.15867	463.251	0.842709	0.263289	0.249287	0	-1.001	0	0.0975664	1.07517
2024			[294][M+1]+		M410T392	6.52548	↓	0.76778	410.166	0.842496	0.108849	0.155769	0	1.29875	0	0.120592	1.31382
4335			[773][M+4]2+		M774T471	7.84497		0.906104	773.967	0.842148	0.123996	0.16687	0	-1.001	1.001	0.123211	0.779527
1515					M317T44	0.734803		1.09239	317.071	0.842009	0.435798	0.328077	0	0.942008	0	0.0748911	0.931958
1345					M292T180	3.00724	↑	1.34839	291.638	0.84136	0.7399	0.44373	0	1.00121	-1.001	0.036012	0.142805
4340			[776][M]5+		M775T295_1	4.92125		0.889729	774.502	0.84127	0.0881812	0.13941	0	0	0	0.211477	2.07212
3321					M609T317_1	5.29031		1.09407	608.502	0.841239	0.138439	0.177903	0	0.526409	0	0.107171	0.905061
99					M111T197	3.27652		0.817267	111.117	0.841118	0.0895447	0.140487	0	-0.00496865	0	0.108587	0.286309
2019			[294][M]+	[M+Na]+ 386.173	M409T392	6.52572	↓	0.759232	409.162	0.841087	0.0869552	0.138427	0	-1.41885	0	0.135423	1.17253
283			[37][M]+		M143T78	1.30258		0.948574	143.118	0.840697	0.579428	0.384496	0	1.001	0	0.106582	0.734262
3874			[682][M]6+		M693T295_1	4.91732		0.890564	692.935	0.840558	0.00497247	0.0290065	0	0.929764	-1.001	0.299488	1.41593
3886					M694T295_4	4.917		0.911483	693.771	0.840339	0.0644765	0.117631	0	0	0	0.219715	2.44349
2753			[455][M+1]3+		M526T271	4.52456		1.1217	525.948	0.840205	0.0560821	0.108804	0	-0.982973	0	0.156946	0.21092
1484			[195][M+1]+		M311T445	7.41318		0.97031	311.16	0.839935	0.917772	0.49735	0	0	1.001	0.00977907	1.07099
3180			[548][M]6+		M585T272_1	4.53157		1.0432	584.637	0.838561	0.140963	0.179749	0	-1.001	0	0.131904	0.369783
3064			[522][M+2]5+		M563T307_2	5.10895		1.14665	563.101	0.838462	0.0471623	0.098353	0	0.958062	1.001	0.154181	0.937045
3523			[623][M]+		M638T307_1	5.11126		1.08959	637.663	0.838451	0.106086	0.15359	0	0	-1.001	0.147245	0.0363162
3543					M639T286	4.76359		0.847592	639.34	0.838442	0.00909264	0.0396525	0	1.36225	0	0.24343	0.83746
3435					M624T293_1	4.87678		0.838081	624.322	0.837876	0.014483	0.0511779	0	1.00324	0	0.208965	0.113212
2516					M497T270_1	4.49262		1.13403	496.587	0.837764	0.143938	0.18189	0	-1.02066	0	0.148865	0.816452
802			[111][M]+		M217T89_3	1.48478	↑	1.46742	217.155	0.837762	0.493448	0.350971	0	-0.840574	0	0.0220762	0.310752
2291			[345][M]3+		M461T172	2.86886		0.937948	461.249	0.837161	0.593528	0.390201	0	-1.00049	-1.001	0.0347413	0.453054
2882			[481][M+1]+		M545T453	7.55701	↓	0.797139	545.343	0.836972	0.813922	0.467375	0	1.00065	1.001	0.0366707	0.297462
720					M205T129_1	2.14618		0.824045	205.289	0.836494	0.392775	0.309786	0	0.27748	0	0.126887	0.22409
3248					M599T292_4	4.86726		1.19678	599.147	0.836437	0.00962945	0.0407088	0	-0.708792	1.001	0.276602	1.08128
2839			[474][M+2]7+		M538T295_3	4.91945		1.08589	538.001	0.836326	0.411824	0.31781	0	-1.001	0	0.0668021	0.00881712
1860					M380T78	1.29423		1.01764	380.112	0.836306	0.888711	0.489307	0	-1.57016	1.001	0.00842669	0.396448
1738					M357T203	3.39056	↑	1.32944	356.684	0.835887	0.168819	0.198384	0	-0.689865	0	0.0677722	0.632815
2141					M431T452	7.53398		0.814546	431.315	0.83579	0.102145	0.150465	0	-0.758561	-1.001	0.133322	0.19791
1867					M382T438	7.30153	↓	0.794231	382.271	0.835157	0.24191	0.237993	0	1.16046	0	0.0681537	0.216236
3040					M561T313_2	5.21238		1.08146	560.806	0.835083	0.0967551	0.146192	0	-1.001	0	0.160207	0.20207
2841			[474][M+3]7+		M538T295_4	4.92213		1.1069	538.144	0.834217	0.403763	0.314355	0	-0.904903	0	0.0699604	0.0321137
4421					M797T323_1	5.37763		0.872501	796.949	0.833852	0.0614365	0.114425	0	1.001	0	0.188237	2.37061
2704			[444][M]+		M520T454	7.56686		1.01505	520.341	0.833623	0.263852	0.249587	0	1.06927	1.001	0.108152	1.2409
3553					M640T308_1	5.13648	↑	1.23915	640.06	0.83294	0.0493311	0.101012	0	1.07059	1.001	0.0929326	2.61145
4017					M715T290_1	4.82691		0.892493	715.225	0.832863	0.0326973	0.0805104	0	1.00498	1.001	0.26794	1.63391
477				[M+H]+ 171.089 [M+H-H2O]+ 189.1	M172T86	1.43275		1.18624	172.097	0.832628	0.061541	0.114531	0	-1.00368	0	0.133294	0.120355
3414					M621T428	7.14099		0.857315	621.322	0.832535	0.127794	0.169789	0	-1.001	1.001	0.0975645	1.22761
4867					M952T289_1	4.81107		0.860625	952.188	0.832314	0.0302767	0.0770662	0	-1.41435	0	0.144254	1.35706
973				[M+K]+ 201.876 [M+Na]+ 217.851	M241T19	0.312441		0.910795	240.839	0.831229	0.928886	0.500359	0	-1.00103	1.001	0.000898851	0.0437968
2034			[294][M+2]+		M411T391	6.52475		0.801073	411.168	0.831118	0.169363	0.198719	0	1.21112	0	0.104907	0.384304
1316					M288T77	1.27938	↑	1.25913	288.064	0.830888	0.453526	0.335397	0	0.690726	1.001	0.0401045	0.550905
4566				[M+2Na-H]+ 796.309	M841T323_4	5.38129		0.871594	841.279	0.830782	0.103243	0.15131	0	1.01792	0	0.139936	1.87084
1413			[184][M+2]2+		M303T373_2	6.2153		1.09958	303.035	0.830779	0.160337	0.193027	0	-0.837906	0	0.127717	0.467512
1140					M263T91	1.51494		0.891947	263.069	0.830653	0.48526	0.347875	0	-0.894414	0	0.0381197	0.396035
4567					M841T321_1	5.34453		0.870875	841.338	0.830111	0.111895	0.158113	0	1.00164	0	0.131439	1.96123
3676					M660T289_9	4.81397		0.829364	660.131	0.830002	0.0173082	0.0564775	0	-1.1288	0	0.206692	1.86895
1641					M338T533	8.88089		1.13325	338.342	0.829897	0.372417	0.301418	0	1.13645	0	0.0950513	0.890124
691				[M+H]+ 202.099 [M+H-H2O]+ 220.11	M203T468	7.79376		1.13943	203.107	0.829813	0.0891145	0.140149	0	-1.001	0	0.135426	0.557352
3027					M560T22	0.371361		1.16173	560.079	0.829223	0.10908	0.155948	0	-1.00146	0	0.192086	0.274656
3030			[514][M+1]3+		M560T290_4	4.82928		1.10591	560.297	0.828933	0.0463249	0.0973211	0	0.927004	1.001	0.187184	0.204834
3133			[538][M+1]+		M575T280_3	4.66994		0.937427	575.061	0.828797	0.667656	0.418538	0	1.001	0	0.034156	0.111275
2684			[436][M]4+		M518T312_3	5.20728		1.12419	518.05	0.828548	0.0750079	0.128081	0	-0.944034	1.001	0.219133	0.553541
2867					M542T253_2	4.21752		1.00675	542.288	0.828519	0.517439	0.360124	0	-1.001	0	0.0375735	0.465559
253			[34][M+1]+		M138T79	1.30959		0.879211	138.049	0.828324	0.142015	0.180511	0	-1.00591	0.277371	0.114056	0.255808
1297					M283T489	8.15079	↓	0.766722	283.224	0.828096	0.559528	0.376651	0	1.001	0	0.0358698	0.28614
299			[41][M]+		M146T258	4.29989		0.845776	146.06	0.828004	0.0104636	0.0422278	0	-0.610805	0	0.236991	0.17052
4662					M869T284_1	4.73072	↑	1.2365	869.199	0.827788	0.394156	0.310338	0	1.001	0	0.0792125	1.784
3880					M693T295_6	4.91361		0.936242	693.353	0.827776	0.196468	0.214198	0	-1.001	0	0.153814	2.50277
2249					M451T177_2	2.94486		1.12641	451.247	0.827532	0.258486	0.246705	0	0	0	0.0980403	0.349273
1194			[158][M]+		M269T79	1.31057		1.11271	269.089	0.827427	0.186984	0.209038	0	1.001	0	0.132241	0.435367
2679			[433][M+1]2+		M517T243_2	4.05048		0.921789	517.238	0.827131	0.684678	0.424677	0	-1.001	0	0.00115096	0.00329216
[truncated: 1,914 more rows]

## Sheet: Table S7_ Output from XCMS
	name	fold	tstat	pvalue	mzmed	mzmin	mzmax	rtmed	rtmin	rtmax	npeaks	control	ghb	TXC1	TXC2	TXC3	TXC4	TXC5	TXC6	TXC7	TXC8	TXC9	TXC10	TXC11	TXC12	TXC13	TXC14	TXC15	TXC16	TXC17	TXC18	TXC19	TXC20	TXC21	TXC22	TXC23	TXC24	TXC25	TXC26	TXC27	TXC28	TXC29	TXC30	TXC31	TXC32	TXC33	TXC34	TXC35	TXC36
X61.373	M61T373	1.03037	-0.213929	0.831043	61.0395	61.0383	61.0426	372.946	371.449	374.739	92	44	48	178193	287218	88652.1	345194	179548	102040	87893.8	141048	116570	175124	146160	63354.6	189101	72582	101038	96765	113351	104209	82895.7	87733	111318	98628.5	101952	121966	165964	99846.5	117938	59128.2	72081.6	65841	95188.8	77882.6	47762.4	45850	36040.2	12336.1
X61.21	M61T21	1.00347	-0.0308328	0.975468	61.0395	61.0391	61.0408	21.4587	12.7874	22.9537	58	25	33	18598.3	45204.3	24418.2	53692.2	28272.4	39625	118466	89768	60362.2	137136	54230.8	36150.7	64531.2	94650.8	50548.5	61298.1	190433	62073.8	45788.6	50017.5	89846.1	34622.7	104124	143050	76304.8	82876.1	62333.2	39783.2	79200.7	127827	54533.3	54412.6	128525	80133.8	98924.8	3182.55
X61.49	M61T49	1.40537	3.79622	0.000260201	61.0395	61.0389	61.0406	48.9179	45.859	54.1281	57	20	37	45951.9	209754	46364.1	175335	110417	44539.4	77926.4	75057.5	75033.9	65563.3	72957.1	44400.6	94642.5	117072	65754.5	71474.7	100884	78036.6	62041.5	64659.3	86211.1	170384	148447	104781	101855	89974	28044.7	46536.1	76950.2	60013.7	48612.3	55242.4	125795	96584.5	79307.6	31245.7
X69.33	M69T33	2.5682	-2.77793	0.0067769	68.9969	68.9964	69.0005	32.5387	29.0534	35.0136	50	17	33	1.3243e+06	634101	25951	1.29927e+06	704378	1.04784e+06	716254	1.22099e+06	26169	27559.6	1.00438e+06	703524	884795	61925.2	1.30071e+06	45117.2	31641.2	38235.3	36725.7	49964.7	43450.8	67060	52468	1.15695e+06	842435	911956	819838	943630	66426.6	43029.7	738119	910463	2594.1	2121.41	2213.27	2103.38
X69.1.196	M69T196	1.24301	-1.46536	0.146501	69.0697	69.0689	69.0729	196.323	194.324	197.808	82	41	41	23938.3	16058.6	27318	38839	74936	11028	12042.4	55321	23604.2	25216.9	37777.6	12015.3	28177.3	33604.4	29852.8	20495.2	10190.7	17706.9	27843.1	26212.1	32812	34058.1	35721.5	13675	11839.9	1186.81	25378.5	9667.08	13380	14560.1	8145.51	5959.78	6445.83	4536.55	17097.5	20347.2
X69.1.65	M69T65	1.79713	-2.11955	0.0365573	69.0698	69.0691	69.073	64.7675	58.0084	75.1358	84	38	45	81081.1	112595	200603	237377	14593.1	71955.1	155525	193077	89252.5	77070.1	103368	134726	157867	26390.1	353326	9947.02	9397.43	12436.6	13153.5	11888.9	7997.52	18084.4	16344.5	240231	294094	209669	270268	141953	13121.4	12050.7	83495.4	190952	22085.3	27543.2	24237	34974.9
X70.80	M70T80	1.95723	-2.92146	0.00451978	70.0286	70.0282	70.0294	79.9608	79.0396	85.6267	49	20	29	21304.7	29448.3	41662	53803.8	41898.4	13913	33911.2	22962.3	32118.6	37639.9	57889.4	16334.2	39841.8	6846.49	78256.7	4292.53	2687.36	2949.89	5815.26	4165.95	3790.47	5247.38	4169.08	32561.1	24217.5	32850.4	27895.7	31904.7	6201.21	4796.9	18231.4	13609	4598.89	5155.79	8888.62	4991.29
X70.1.22	M70T22	2.40707	-3.48732	0.000812503	70.065	70.0643	70.0684	22.2655	14.5884	23.8533	78	34	44	311591	480706	231084	590541	245217	442246	438498	320764	366638	301781	433215	262224	445377	47211	432240	19049.2	28987.5	44970	30658.2	38328.5	33844.5	3735.38	52768	350582	353135	333567	303417	223950	23711	62809.4	314634	293170	27247.1	46791	43548.9	2175.18
X72.1.32	M72T32	1.53483	-3.59	0.0005259	72.0809	72.0798	72.0842	31.6643	28.1249	34.1258	99	50	48	1.36866e+06	1.11775e+06	1.46217e+06	1.42726e+06	651002	1.16515e+06	1.57618e+06	298218	352334	423835	988620	525861	831580	455552	370138	248646	326894	221271	248327	247825	164503	444960	287572	756024	523912	891209	355430	683675	221668	285675	625715	320133	613998	771427	620818	752246
X72.1.24	M72T24	1.00393	-0.0417788	0.966771	72.081	72.0797	72.0842	24.4898	21.5904	28.0546	93	44	49	580339	1.08545e+06	661295	996559	924275	451393	666754	951266	1.09856e+06	921421	2.19578e+06	558146	680469	942070	1.05255e+06	734526	744654	647399	728835	777462	655382	1.5295e+06	663417	909607	747908	341332	675275	661048	649723	632970	605354	877537	369924	474226	339202	103608
X73.1.130	M73T130	1.53952	1.92498	0.0582606	73.0647	73.0642	73.068	129.834	128.511	130.573	40	12	28	1518.08	10480	14587.1	13301.8	20177.5	6325.97	4885.2	12188.5	14234.3	6992.34	1032.8	9465.85	2294.5	2716.98	4281.86	2367.04	2347.14	2587.85	2549.45	2973.66	2472.28	2975.69	2343.25	3113.62	3065.96	2679.01	3389.06	2470	1725.26	1719.91	8374.22	3364.71	4385.21	2501.87	4590.78	6731.59
X73.1.32	M73T32	1.57345	-3.03574	0.00331355	73.084	73.0826	73.0873	31.5579	29.1069	33.6818	82	46	36	44848.3	61580.1	71346	82779	131001	66470.4	55567.7	11532.6	36548.3	36163.2	61423.8	26421.4	1679.15	20630.8	20051.1	11176.3	13824.9	10803.4	11102.3	10763	9459.59	18307.9	12390.6	22493.2	46806.6	20914.7	38456.7	18276.9	9960.88	12534.5	25418.3	18502.4	23353.1	26307.6	24813.5	27349.2
X73.1.24	M73T24	1.0415	-0.350302	0.726928	73.084	73.0826	73.0859	24.4845	21.1904	27.9976	78	33	45	23094.7	35929.4	34916.8	77701.4	64303.6	19812.7	90467.2	36863.2	45976.3	82710.1	54951.6	22694.7	28416.9	39246.3	48709.4	23127.4	27178.7	25972.6	23363.6	27241.4	21723.9	29827.4	28777.7	41336.9	32957.1	21281.7	26605.7	29262.3	27183.2	26989.6	24629.5	34361.1	14848.9	15698.2	14501.9	3310.96
X75.22	M75T22	1.1525	1.33242	0.185942	75.0439	75.043	75.0457	21.9647	13.5874	28.4567	68	31	36	17787.3	18645.2	11930.2	26926.9	20102.4	31583.8	64738.5	44018.6	21549.3	41141.2	45637.5	24540.8	38818.2	28627.8	24251.7	34246.3	34300	34676.5	46237.7	40251.8	43612.6	40264.7	55496.9	42026.8	34250.3	32549.7	43046.1	31031.5	43684.7	30926.2	24500.5	42164.6	36844.3	53257.6	34043.6	1711.42
X77.95	M77T95	2.09347	-2.48784	0.0145609	77.0384	77.0378	77.0395	94.7145	92.4634	97.3842	76	30	46	71206.7	108339	125549	284666	233046	87980.2	71237	92635.3	123157	121085	96077.5	51980.4	154997	13592.8	235013	5385.88	5856.44	5759.29	5759.04	5833.19	5209.13	11609.4	6276.27	132774	113151	132156	134718	90053.4	6376.02	8116.14	98068.3	123548	17025.5	18323	15971.7	15762.1
X79.1.95	M79T95	2.95123	-3.15495	0.00224942	79.0541	79.0534	79.0553	94.7238	92.6298	97.3842	64	28	36	129234	157933	207761	281170	283620	123399	93433.6	111698	116688	120119	136956	74325.9	116954	6661.53	170928	2836.43	1340.02	3196.35	2141.17	2540.62	2865.77	3933.23	3548.68	93584.4	92906.2	115356	101799	97411.1	4249	3811.34	70674.9	91546.1	5860.53	6443.61	6137.68	6496.17
X80.42	M80T42	3.47508	-3.56376	0.000614941	80.0494	80.0487	80.0498	42.4015	34.8917	43.0689	51	22	29	382545	415659	491723	582648	621753	381260	272967	332046	347370	359281	331658	224509	405740	7653.46	440162	941.83	952.232	1037.97	967.436	994.643	1655.79	5661.61	4920.32	366399	380048	409999	406913	395830	3305.79	3353.14	331221	352010	3666.36	6490.16	5894.46	3676.13
X80.9.19	M81T19	1.65448	-1.64366	0.105626	80.9479	80.9465	80.9514	18.9487	10.5864	25.0328	83	41	42	193440	220170	216651	1.20779e+06	433647	388099	89673.6	140592	95986.2	193495	10590.5	69790.2	175491	112006	90583.8	57805.8	48160.3	66158.6	48449.7	60374.9	76245.3	838.404	65805	119069	7851.21	268825	334727	48753.3	56905.4	53396.4	63075.6	16626.8	65139.4	58889.3	30055.6	1187.2
X82.9.19	M83T19	1.67496	-1.63266	0.107811	82.9449	82.9435	82.9485	18.9375	10.3854	24.8328	81	39	42	60849.4	68258.1	71455	454750	142768	122295	28092.6	47149.1	28639.8	103400	44941.2	48532.1	59446.3	22805.3	33030.9	18845.7	16480	22003	20028.7	22324.8	24952.3	992.075	22294.5	42195.9	2504.15	68651	93677.8	16690.3	17304.4	19028.7	20720.6	6918.32	21435	33191.2	10321	1395.06
X84.53	M84T53	2.16041	-2.88981	0.00478455	84.0444	84.044	84.0451	52.5691	45.0341	53.6137	71	28	43	383064	638986	513772	867636	868544	374093	379690	535756	567103	712137	1.001e+06	298047	971570	73133.1	1.01988e+06	22468.7	16761.2	14627.1	38742.6	22076.1	13114.1	45352.3	50665.3	699152	513957	646409	542106	495028	22499.4	18867.6	216532	397206	55709.7	91727.5	140057	53065.5
X84.1.81	M84T81	2.0618	-2.57205	0.0117181	84.0807	84.0801	84.0821	80.5717	78.2063	85.0198	43	16	27	65716.8	102673	109062	157720	144859	28162.8	137156	101603	126411	140429	218256	82977.1	232939	15474.4	339487	6887.22	6062.59	6961.49	9684.04	7948.6	8586.21	20493	17779.8	144908	109988	152487	151198	136930	10913.1	8636.94	65012.1	69387.5	13038.9	18614.2	15321.9	18897.3
X85.22	M85T22	2.40555	-2.5688	0.0119219	85.0283	85.0275	85.0328	21.7832	10.7148	30.2544	67	23	36	18245.5	298203	6830.03	444821	583091	237337	69346.4	314673	346907	390323	453133	397106	1137.03	20586.5	393772	7807.7	9067.32	7310.85	9169.7	7970.93	9028.06	1974.72	5966.03	339187	359247	281511	399284	282725	15493.8	8973.09	263956	366081	9635.78	12174.2	12458.8	1407.52
X86.1.74	M86T74	1.01307	0.0806985	0.93586	86.0602	86.0586	86.0628	73.5234	67.9507	74.5281	101	50	51	170027	1.13691e+06	155773	207612	229112	101870	83549.7	84241.4	118910	105212	45960.6	137102	259411	240317	570590	227113	131574	203026	225897	201473	344550	384271	372701	261837	110973	381351	498443	114966	245359	227556	89545.5	54099.5	92875.1	90150.1	217294	216053
X86.1.90	M86T90	1.01814	0.156405	0.876033	86.0601	86.0598	86.0638	89.5513	84.141	96.7771	49	21	27	54651.3	3395.2	40925.9	115111	117907	33530.8	93095.4	17603.7	113020	88381.6	159293	116165	345636	138938	173850	72268.5	50712.3	68687.5	76181.8	73031	94143.9	217829	227636	79065.9	157337	21989.4	220074	109809	79666.6	77070.3	81788.7	89160.5	76701.8	48372.2	188125	128192
X86.1.68	M86T68	1.1186	-1.32934	0.186828	86.0973	86.0957	86.1008	68.3322	62.4843	72.5598	135	51	51	1.19939e+06	380620	917859	2.8557e+06	1.45824e+06	720956	1.03215e+06	1.13646e+06	1.3018e+06	1.02456e+06	1.30373e+06	2.12138e+06	1.25023e+06	2.53038e+06	2.84735e+06	2.33625e+06	2.2886e+06	2.52021e+06	2.41599e+06	2.41374e+06	2.28461e+06	1.2158e+06	1.86121e+06	1.02182e+06	2.68739e+06	1.11683e+06	1.39154e+06	902865	1.36492e+06	2.23779e+06	272786	1.03867e+06	1.23876e+06	3.03502e+06	1.55819e+06	3.22274e+06
X87.32	M87T32	2.40666	-2.97845	0.00378985	87.0075	87.0068	87.0095	32.451	27.9974	38.9469	34	6	27	128163	179696	74083.1	360176	300067	236995	163630	230034	194139	243004	162794	162046	209055	21958	303960	9357.43	9726.22	10378.5	7643.61	7751.1	12963.3	21998.2	18666.1	218164	130681	150707	140667	176723	20656	13685.9	113546	153441	6128.66	7248.68	5285.69	10427.6
X87.51	M87T51	21.137	12.2746	0	87.0445	87.0433	87.0465	51.0859	42.9316	58.3206	60	6	51	102926	91065.7	98696	185945	153319	101992	8805.04	72919.8	64776.5	85568.2	53275.1	70433	126136	28124.8	55105.5	10160.7	8417.61	8861.34	19624.4	14375.8	7645.61	22806.1	25406.8	112708	79369.3	3605.9	94654.9	90958.5	14112	13138.4	47924.4	62335.4	9068.57	13909.1	10569.9	20018.3
X87.1.74	M87T74	1.48712	-2.16645	0.0327602	87.0633	87.0626	87.067	73.5125	68.1528	74.3741	56	23	33	89973.3	8571.09	6073.74	179622	179892	52906.2	70181.7	76765.7	82057.4	59391.5	71945.7	68797.1	11552.7	13821.5	26293.2	11449.5	6231.94	11136.4	10242.9	9752.28	14219.5	16944.5	18303.5	104590	84496.7	14884.8	22967.5	42886.7	11852.7	11229.1	47658.4	63721.4	4239.72	101609	95329.4	10621.5
X87.1.68	M87T68	1.0846	0.834667	0.405902	87.0999	87.0984	87.1037	68.4361	62.6623	72.4087	119	50	51	66631.7	159701	239855	9761.83	255034	98438.6	137589	116997	80599.8	54232.1	181519	148179	133475	263786	167710	161240	157458	189458	161711	166738	149316	160747	121782	58233	6057.14	155577	222947	5691.1	168231	168070	27216	31428.8	163567	277832	237744	342068
X88.23	M88T23	1.97432	-2.87864	0.00503987	88.0214	88.0207	88.022	22.7179	14.7884	28.3999	65	23	40	76290.3	71532.3	64514	144575	130122	131779	203937	186315	181968	216798	160821	155339	200237	19530.9	309127	18408.2	11129.7	8350.93	26553.5	14242.8	9405.79	5942.2	17060.9	235127	115792	92798.6	131171	172846	14404.4	7319.1	128414	185662	35904.8	23822.6	35405.1	1211.79
X88.51	M88T51	3.95021	7.86961	7.92499e-11	88.0476	88.0471	88.0486	51.0069	43.3313	53.6137	51	0	49	11006.6	10924.2	13467	31867.8	40150.8	12899.5	12111.9	14594.6	14076.8	14076.9	15379	17117.9	27705.2	4166.76	29383.3	2135.85	2004.94	2342.4	2684.71	2225.01	2219.6	3093.18	3371.39	14764.6	17504.3	22304.2	26709.5	17418.3	3084.86	2481.78	9797.77	13408.5	11762.4	15718.4	6187.69	4088.13
X89.1.268	M89T268	1.39717	1.50541	0.136368	89.0597	89.0594	89.0615	268.189	264.712	269.36	52	26	26	5854.99	6615.53	6794.98	11943.7	14609.1	3377.13	5002.01	9374.16	14715.5	21398.6	25213.7	6828.26	7120.01	4934.59	7700.5	8551.96	4865.57	6567.68	3208.18	3850.22	4348.75	6498.23	4394.34	3708.33	4304.32	3512.71	5141.43	3592.87	3263.64	2452.56	24055.6	5066.01	31609.7	5926.43	32863.1	43224.9
X90.1.21	M90T21	1.15306	-1.05266	0.295057	90.0549	90.0535	90.0575	21.3529	13.1874	30.5172	88	42	45	53817.3	64443.5	78985.6	76990.7	87110.5	74660.4	110044	6468.55	88988.7	72748.6	61917.8	20172	69590	43593.1	61279.7	35107.5	29682.1	20205.1	23768.6	23056.2	25458.9	6200.26	38248.7	55585	71648.1	64638.1	59295	48986.5	21936.4	19465.5	39203.6	50791.3	16324.8	45482.4	85803.2	1579.2
X91.10	M91T10	1.04605	0.526911	0.599502	90.9766	90.9764	90.979	10.498	0.991449	20.8099	86	41	45	1.5858e+06	1.0366e+06	1.90649e+06	1.60037e+06	1.33953e+06	947957	890971	1.46332e+06	0	1.14156e+06	1.65073e+06	1.1648e+06	1.61401e+06	2.06829e+06	0	1.73384e+06	1.62825e+06	1.70332e+06	1.81996e+06	1.85275e+06	1.82625e+06	2.4365e+06	1.6067e+06	1.11432e+06	1.32928e+06	1.07774e+06	1.55108e+06	1.15107e+06	1.5318e+06	1.26108e+06	865937	0	2.05904e+06	2.14257e+06	2.64634e+06	1.95115e+06
X91.36	M91T36	1.05646	-0.27849	0.781341	91.0389	91.0386	91.0392	35.9996	32.2116	36.8415	59	22	37	7724.88	7262.83	8046.57	23003.6	18002	8733.61	5060.35	6612.3	5541.88	7705.94	7928.97	24412.4	12433.7	18063.2	12732.4	31715.4	26728.6	38730.8	49975.4	28414.3	34380.2	12487.6	40404.4	7055.65	20468.3	6401.18	11082.7	7969.41	7851.53	12468.9	7326.96	4307.05	5939.56	14033.8	11072.1	14829.5
X91.1.95	M91T95	2.48573	-2.93709	0.00420761	91.0541	91.0536	91.0567	94.7355	92.6298	97.3842	72	29	43	103110	135169	165425	284888	250448	109423	92140.6	107715	116891	122309	126072	75318.7	158284	12034.7	230876	3749.81	3463.61	3913.06	4375.9	3547.66	2904.99	8244.92	5023.94	126399	121365	142065	131653	114862	7360.48	6304.23	90079	118163	9523.88	11180.7	9726.82	10901.4
X91.1.60	M91T60	2.64962	-3.08247	0.00275656	91.0542	91.0538	91.0548	59.8754	52.3443	63.1315	91	28	42	230017	472240	460782	780018	574173	151579	505111	666389	517771	454288	528192	229111	692481	33879.2	665028	5920.91	5865.81	13102.7	7037.73	6566.93	4261.45	37466.9	12367.7	641153	782633	704648	751894	374015	21625.6	13143.9	272555	637449	28314.2	47309.4	35506.8	50832.2
X92.10	M92T10	1.00798	0.0890699	0.929205	91.9799	91.9782	91.9821	10.1376	0.991449	20.8099	83	37	46	44721.9	17970.8	49226.4	27370.9	20406	16013.3	21305.8	14674.5	0	18290.5	21432.3	16193.1	25618.1	29734.1	0	26043.1	22572.4	22923.7	24423.3	25058.3	27179.3	30461.9	28341.7	15079.2	20254.4	0	0	17457.6	29249.6	19832.5	11357	0	28349.1	26878.9	40840.9	40435.6
X92.1.146	M92T146	1.58314	-1.97368	0.0525495	92.0603	92.0577	92.0617	146.17	143.36	151.082	71	32	39	5209.92	13836.9	6562.81	12447.4	11239.6	10944.3	15614.1	16112.3	13808.2	49396	49907.2	33611.7	33554.9	19971.4	56597.6	8947.8	3867.52	6024.85	5653.21	5831.33	7187.35	8778.03	13461.8	143457	13954.6	19519.6	24578.6	13405.3	4042.82	4768.58	30342.2	20240.5	9747.21	15138.9	11318.4	28279.6
X93.11	M93T11	2.06942	-1.90857	0.0610909	92.9808	92.9805	92.9828	10.5154	0.991449	21.8098	55	27	28	120891	174488	8817.4	16485.8	41022.4	14865.6	248780	16254.8	0	9110.78	80551.3	19261.4	10769.4	14151.5	0	0	10163.6	10061.3	9261.86	9498.6	9801.81	0	14538	143011	0	0	0	38637.4	14881.3	9750.79	43098.8	0	11721.1	10062	16028.9	12576.5
X93.1.22	M93T22	1.31324	2.89561	0.00466179	93.0549	93.0543	93.0554	22.0836	13.5874	29.4644	76	26	44	95078	96286.1	58038.5	163827	95771.4	196734	412888	361174	163407	268762	257126	229469	344390	439079	228311	476915	540689	502507	583659	549413	606844	325680	640527	332334	239895	262632	312356	211776	477246	440239	224441	198880	473362	616620	605046	1883.05
X93.1.58	M93T58	1.1087	0.7566	0.45107	93.0549	93.0545	93.0553	57.8761	52.6919	64.8001	65	18	44	127015	202482	121128	424183	299217	82791.2	244881	262433	210166	180976	285870	537500	673052	553418	347474	563223	1.40181e+06	343628	542593	622499	827402	617739	1.28408e+06	329240	232194	267665	318424	77021	274489	232075	145209	156268	358514	369172	318414	87346.2
X93.1.36	M93T36	1.07104	0.621959	0.535456	93.0547	93.0544	93.0551	35.7219	33.9864	38.4905	43	13	30	69235	116804	73851.4	187146	125113	123983	155069	117298	79720.1	68121.6	90289.1	100474	191620	198609	127112	211446	201351	169482	160097	172103	192525	177836	244180	112908	101119	100518	138565	28944.7	92102.1	86026	62505.4	67644.2	359836	468268	319080	125359
X93.1.89	M93T89	1.0273	-0.201924	0.840423	93.0548	93.0543	93.0552	88.6244	78.8775	96.7965	72	24	29	187965	235391	239431	363354	302499	172000	217906	230784	256954	211036	241373	225511	467912	217380	407330	347861	132411	167063	122287	360010	147849	615496	331379	215817	233425	276801	275442	174953	100767	79059.2	151231	165853	250764	136214	298347	31840
X93.1.95	M93T95	2.1697	-2.95094	0.0039874	93.0695	93.0688	93.07	94.7311	89.5422	97.5869	60	23	37	186070	244340	263616	404505	333625	178628	177307	206426	246665	197719	240651	185601	316719	10100.7	321928	91376.9	98929.2	85698.7	89294.3	92902.7	105380	7231.5	5581.12	199399	185468	231812	208494	163281	50388.2	6671.92	137843	153474	9522.2	10337.8	9386.54	9557.37
X94.1.22	M94T22	1.2407	2.27927	0.0247768	94.058	94.0576	94.0584	21.8344	13.3874	23.4675	52	19	33	3936.89	3827.79	3277.77	8469.18	6734.13	8157.32	13823.3	9358.5	6329.1	17956.8	20016.5	11396.9	13407	14814.3	9649.02	14815.2	17352.8	14308	20057.8	19138.8	20581.1	4281.46	21916.4	11355.3	10964.1	11126.2	13163.8	9453.91	18464	13466.1	7949.53	6731.01	10997.2	17087.9	11332.7	1083.77
X94.1.92	M94T92	1.39083	-1.91238	0.0589239	94.0649	94.0636	94.0679	91.7263	90.0475	93.1076	65	31	34	13661	13924.9	15327.8	35001.6	30055.6	13564.6	35326.4	25611.7	24603	29985.1	27457.1	22244.7	50654.5	12392.5	40387.2	6412	7787.12	5811.06	5191.65	6849.73	8019.99	17692	7485.83	22294.3	30176.8	22424.6	31165.3	18721.8	6672.34	5599.02	10014.4	12648.1	10598	11334.2	13877	10139.6
X95.95	M95T95	2.4483	-3.34265	0.00128507	95.049	95.0484	95.0517	94.7148	92.6464	97.3842	74	32	42	55537.5	80511.8	98117.2	71037.2	82443.3	47995.7	52510.3	41619.3	53065.2	49180	89362.8	57101.2	83297.9	14059	160781	4650.82	4129.2	4990.72	4315.94	3913.09	3831.49	4207.64	5665.97	62991.7	58202.9	77890.5	107042	97399.5	8813.73	7122.67	58618.5	70796	5676.51	8188.33	7061.66	7630.56
X95.60	M95T60	2.62383	-2.87556	0.00527883	95.0491	95.0487	95.0497	59.8242	51.9855	63.5306	92	29	42	87827.8	217776	227480	582334	321443	59784.8	306829	319547	240790	198362	280937	1.1165e+06	415582	33210.4	508208	17790.9	14118.1	16993.2	13887.9	7222.46	10740.5	35601.1	24341.1	284761	426451	370535	470562	181217	24844.8	22459.5	122456	364190	28229.8	26067.5	19153.6	47860.3
X96.43	M96T43	3.19216	-3.85275	0.000256177	96.0443	96.0437	96.0455	42.6494	40.6627	48.4691	53	21	29	87767.3	125199	173042	164672	193667	99871.6	76296.1	49324.7	90505.9	89653.5	82675.7	55432.3	96870.7	10370.7	154576	3333.92	3754.85	4050.15	4415.73	2662.2	8512.26	5907.19	17672.7	94361.4	81076.2	117223	153329	144041	3427.93	3922.86	78870.2	85113.5	6815.85	5212.82	6735.64	17872.2
X96.9.19	M97T19	1.40966	-1.98846	0.05036	96.9221	96.9206	96.9261	18.9399	10.5864	27.9853	86	44	42	232926	278540	310604	609529	538929	474405	91030.8	274813	254321	309905	17912	21471.5	279823	145517	80470.7	144691	117511	104461	89278.1	117092	187446	523.308	132968	212950	357416	554443	221389	83197.4	100007	86822	105838	7375.58	122884	142937	69327.3	1183.21
X97.22	M97T22	1.19315	-0.986004	0.326552	97.0282	97.0217	97.0287	21.5871	12.9874	22.9537	51	18	33	4830.82	4133.9	5707.18	12272.6	7014.11	7793.63	27633.8	25234.2	16871.6	42477.1	23481.5	17974.9	18186.1	6910.79	38921.7	4518.05	8670.9	4007.27	6487.26	5024.3	5901.49	2572.07	8162.34	24541.8	30166.3	15972	31445.8	33749	12082.9	7437.97	24593.1	24435.9	5736.36	7191.56	6422.68	1163.49
X98.9.19	M99T19	1.49589	-1.60738	0.113092	98.9193	98.9177	98.9234	18.9199	10.3854	24.6543	80	38	42	89267.7	94530.2	112140	644747	222863	192297	68035.6	87983.1	150788	101880	38608.2	8490.75	116083	54318.3	28937.6	48455.4	77572.8	43189.9	35610.2	46897.9	44654.8	796.61	52568.3	78143	133279	77964.8	91116.2	73598.7	39279.8	35466.6	41736.2	3345.48	46246.5	49175.4	26064.2	1355.09
X99.16	M99T16	1.12166	-0.399565	0.690421	98.9757	98.9741	98.9838	15.6495	7.38541	25.8633	63	31	28	651186	795340	674632	63219.7	1.23428e+06	513131	493219	476128	23482.3	64990.7	142032	299176	1.37921e+06	8689.36	23493.1	6275.94	16039.6	120567	342725	48893.6	9223	0	634614	179635	545168	70433.6	67002.6	33056.7	222596	263026	683058	0	11343.9	19350.4	18615	0
X99.23	M99T23	1.02062	0.207821	0.835798	98.9841	98.9838	98.9866	22.5057	19.6586	27.7843	44	17	27	8103.64	4309.15	4913.26	12537	11660.7	9184.14	26330.5	9140.03	21129.2	9790.75	21065.2	18400.7	22460.8	14483.8	24622.8	9070.73	10878.1	8987.69	13591.9	12020.2	7653.06	5805.08	8509.66	18787.4	25507.7	20725.5	37385.3	32964.3	20897	12757.9	12894.8	22646	14867.7	17643.1	19476.6	3247.45
X99.1.300	M99T300	1.86134	-1.76042	0.0835436	99.0805	99.0788	99.0828	299.526	297.963	300.497	61	33	28	54232.9	28146.7	9856.29	192781	5524.47	80531.3	31153.1	24390.4	22485.2	35076.9	31028	3027	9148.57	11156	10254.5	23708.9	16460.9	12846.8	11460.5	10556.6	12099.7	14182.7	34421.5	6524.35	9040.29	7026.24	8618.98	6381.67	4269.82	5468.46	12860	8306.72	5077.21	5077.79	2995.33	3005.5
X100.1.100	M100T100	1.08369	0.738728	0.462135	100.077	100.075	100.081	99.5406	98.1128	105.839	102	51	51	377383	619231	307597	842053	895536	122279	1.78406e+06	943162	1.62747e+06	1.01752e+06	1.03414e+06	2.22784e+06	1.35641e+06	6.39116e+06	2.80704e+06	3.05541e+06	1.95504e+06	3.17501e+06	3.02608e+06	2.91026e+06	2.0849e+06	4.70711e+06	4.08026e+06	1.90101e+06	1.38128e+06	1.07669e+06	69618.3	905279	1.95665e+06	1.58574e+06	1.3742e+06	1.13684e+06	3.20411e+06	1.22337e+06	5.64282e+06	4.7595e+06
X100.1.131	M100T131	1.47626	1.81366	0.0727322	100.076	100.075	100.079	131.354	124.597	137.918	62	27	33	38464	29078.3	37731.9	69252.3	97812.9	14875.2	15800.2	39998.7	5262.33	184210	83074.9	519156	552207	2.08737e+06	39851.7	984911	419237	1.04089e+06	422810	572112	495846	868458	1.13675e+06	172232	113770	7958.03	456218	44449.5	129176	77957.8	162421	56458.9	158188	45434.1	635784	748932
X100.1.118	M100T118	1.10316	0.292918	0.770194	100.112	100.11	100.113	117.714	108.915	119.764	52	24	26	24648.2	21473.8	17950.6	38306.9	52926.6	6938.82	223835	50095	99707.4	139650	90829.9	545208	988743	6100.58	17936	871948	241390	4999.02	2750.23	5775.73	711550	5831.93	1.34158e+06	307949	179135	268769	755386	73204.1	3611.46	191770	202015	107677	4602.81	5592.3	6848.78	1.56256e+06
X100.2.99	M100T99_1	1.59849	1.81083	0.0732868	100.211	100.209	100.214	99.1954	98.4615	100.088	50	19	31	594.158	756.696	720.14	5278.57	6065.3	432.917	7368.13	760.883	2904.72	3460.04	2839.13	6677.85	26744.2	65275.4	65976.4	16552.3	3941.23	15684.2	13834.2	13196.6	17787.9	52099.2	41633.5	25188.7	5143.91	16767	38747.8	2771.17	10338.5	4156.52	5862.95	2533.93	2660.63	1364.25	6706.26	12462.8
X100.3.99	M100T99_2	1.66851	2.14893	0.0341214	100.344	100.343	100.347	99.2672	98.4615	102.042	64	29	35	516.899	767.752	1002.02	9246.31	9807.52	238.881	12398.2	482.081	1166.7	5688.71	4505.87	35911.2	36925.2	52254.3	76407.3	30670.4	6547.09	27924.2	26840.7	26045.6	37788.1	98926.4	77488.6	47562.5	12280.8	35747.3	88832.2	5163.66	26242.1	10371.1	10181.8	3609.67	6044.83	682.525	2350.95	5667.09
X100.4.99	M100T99_3	1.01557	-0.0242415	0.980724	100.382	100.38	100.384	99.267	98.2603	100.088	56	26	30	388.54	658.358	586.367	2315.6	2665.7	272.87	1144.67	334.343	1447.56	2013.31	1372.51	8394.3	11550.1	8880.31	252506	5310.07	1517.94	5115.07	3336.67	3053.6	3878.57	11627.3	9685.75	10814	2629.76	4506.58	59614	1021.62	1942.27	962.675	3066.04	913.654	2034.11	578.622	5167.14	6821.86
X101.59	M101T59	2.11968	1.78674	0.0798926	101.023	101.022	101.028	58.5366	50.5044	60.7184	101	47	49	21001.3	15558.8	13187.7	21086.6	24657	9131.14	13893.3	12111.8	35903.1	23006.3	14811	16949.8	54559	48512.4	19071.3	39974.8	18068.9	25381.5	38742.1	36061.4	35063.4	38827.5	50842.6	34663.3	41641	21046.5	1029.41	14155.2	41097.2	19611.1	13642.6	14513.2	17202.4	19248.3	12249.6	11653.5
X101.1.88	M101T88	1.66257	4.27494	5.40358e-05	101.06	101.059	101.061	87.6805	86.4479	89.549	58	23	35	3888.09	2909.61	2734.16	6799.85	6169.86	2704.33	7592.01	11489.7	6071.07	7968.32	12693	12039.6	1059.31	17213.5	17627.4	11573.7	6707.25	13283.9	13156.3	6868.3	12543.7	24130.3	27102.5	13351.5	11049.7	8488.22	12158.8	6042.71	7703.72	7472.97	4950.34	5529.38	13104.9	13098.8	25755.4	18939.4
X101.1.99	M101T99	1.26091	1.80688	0.0737995	101.079	101.078	101.084	99.3956	98.43	102.042	101	50	51	60933.6	62507.7	47623	142242	150431	10803.3	299098	64756.7	227879	157836	143158	536756	974039	958439	926536	706912	325644	619931	577246	601369	636877	999912	944151	480382	220408	407203	741515	123789	357921	318679	307945	193568	575677	124888	878674	1.01241e+06
X102.1.100	M102T100	1.16995	1.50183	0.136291	102.081	102.08	102.084	99.5312	98.4615	102.245	81	36	45	5158.03	8690.48	4259.3	12478.1	10170.6	3410.74	14418	7317.13	9349.49	10475.4	6651.2	24208.3	38490	34940.3	36011.5	29918.5	13638.7	26078.1	21403.5	24552.8	25099.8	39318.3	33873.7	19451	10228.8	17463.1	32870	11396.2	15015.3	9733.18	11782.5	11704.5	22821.9	11442.9	30440.3	35710.8
X102.1.68	M102T68	1.83441	-3.20197	0.00198204	102.128	102.127	102.128	68.4861	66.4109	72.6181	46	19	27	40092.5	24365.7	29567.3	63011.1	61889.5	33369.5	67279	48442.8	36814.5	32814.2	75629.9	40957.8	98082.1	10978.9	59244.4	31793.8	16244.5	27054.8	5341.17	31297	6746.71	3986.78	6328.7	34955	91978.6	37393.7	85483.2	36716.7	5310.46	3816.87	27951.7	29923.6	14539.6	15055.8	4908.89	4748.24
X103.1.95	M103T95	1.44632	-3.16292	0.002082	103.055	103.053	103.058	94.8193	92.6639	97.3842	100	49	51	405706	484400	473634	661816	584955	306597	360830	423077	489152	421299	418179	399923	328490	257962	591964	97260.5	92307.3	102212	89505.3	83030.1	84613.6	140620	99556.4	429312	419795	475340	454214	398195	125787	136290	385540	431857	215886	252908	245204	249670
X104.1.38	M104T38	1.17893	-1.56423	0.121033	104.053	104.051	104.057	37.6602	30.8544	38.9089	107	51	51	137055	157700	178512	435741	110644	110955	121600	135061	130477	92010.5	83600.1	64296.3	113491	97367.4	7338.47	71376.7	101355	65309.4	71799.4	63839.7	97678.5	119091	72980.9	113700	89557.8	95242.5	111659	73455.8	85612.8	77521.6	78598.1	126055	91939.4	102213	109522	221460
X104.1.95	M104T95	1.82883	-2.50951	0.0137924	104.057	104.057	104.059	94.7264	92.5486	97.3842	77	32	45	63154.9	96448.2	111214	205021	154391	72531.2	65446.9	35832.7	90652.3	84884.6	76347	61774.4	110211	18154.6	156823	8441.31	7615.53	8829.53	7781.88	7369.67	7248.87	11843.5	8563.48	82783.2	77550.1	97504.5	90114.8	76043.7	10453.5	11123.8	63948.9	77369.4	17825.3	17010.1	15797.4	16350.6
X104.1.22	M104T22	1.52216	-1.76965	0.0814998	104.071	104.07	104.075	21.7583	13.3874	27.154	77	32	45	12268.6	36193.6	41540.4	110540	442562	101877	79653.9	66327.4	35834.9	77438.7	37840.6	127813	32560.6	48303.4	2181.38	19172.9	20423.6	24787.6	45144.9	31503.2	19999.8	7427.98	44643.9	160134	229080	196952	188768	176008	24256.9	27166.4	33203.5	58821.8	37468.1	27168.1	28136.3	1747.41
X104.1.20	M104T20	1.13429	0.970072	0.334399	104.108	104.106	104.112	20.0097	11.5864	27.9371	87	42	45	222670	161388	199121	501035	679453	269881	69679.7	99373.6	136769	220599	173898	95502.7	57228.9	503728	331115	301108	185975	142097	115025	274445	259492	6936.29	400139	182645	95154.9	210167	164046	162195	249445	189339	139949	103502	469434	623148	356347	1818.78
X105.9	M105T9	1.09669	0.921783	0.3589	104.992	104.991	104.994	9.49801	-0.00755091	20.8099	82	36	46	1.55544e+06	4.22514e+06	3.43327e+06	1.00962e+07	4.00323e+06	3.77479e+06	4.91978e+06	3.62418e+06	0	6.1498e+06	6.39207e+06	4.3176e+06	5.51467e+06	1.26548e+07	0	8.84345e+06	8.5962e+06	8.74425e+06	8.47666e+06	8.36279e+06	8.57272e+06	1.19082e+07	8.96004e+06	4.38784e+06	0	0	4.96114e+06	3.61901e+06	9.47396e+06	7.37872e+06	2.02868e+06	0	7.50059e+06	9.8872e+06	1.25778e+07	1.54577e+07
X105.165	M105T165	1.14865	-0.47905	0.633006	105.034	105.032	105.038	165.463	163.422	166.729	97	48	49	6726.83	20720.2	7376.03	68790.6	57114.9	10373.4	11651.3	38801	35102.6	408320	239935	27289.8	59409.6	10806.4	302961	5499.44	16065.5	55795.6	141705	13784.7	83557.3	10887	40193.5	73314.8	48949.3	31308.2	65020.7	28027.9	39900	15412.6	20542.1	33464.8	67532.9	62099.2	29743.1	51849.2
X105.466	M105T466	1.08423	-0.264247	0.792191	105.034	105.033	105.037	465.55	463.569	467.747	63	29	34	7560.54	12993.3	19051.7	26783	22399.6	15483.5	4766.12	5459.92	3218.14	5877.54	6182.36	11553.2	160181	31253.4	143230	19829	18412.8	20014.9	15195.9	17258.4	15290.7	20643.3	19665.8	81873.4	78246.1	53223.5	107773	4403.19	30058.2	20197	73138	151836	12116.5	26375.3	22284.1	15345.3
X105.95	M105T95_1	1.85683	-2.47189	0.0152309	105.045	105.044	105.048	94.7391	92.638	96.2935	77	33	44	48210.1	42000.5	66058.3	141655	137223	65119.2	38272.8	55718.3	46861.3	47428.7	42711.8	34212.9	84276.1	11136.6	96553.6	6812.4	5871.28	12966.3	5578.52	5177.36	5320.02	7868.96	6528.12	63885.1	61085.7	72081.4	74536.7	59676.1	6973.34	7258.42	66964.1	75433.9	10458.6	10981.3	9887.39	9488.56
X105.1.51	M105T51	79.959	10.4201	3.95239e-14	105.055	105.054	105.056	50.8347	43.1315	56.941	49	2	45	5112.21	5353.62	4984.1	11989.1	9757.3	5598.55	6735.26	5691.16	5963.62	5336.17	8722.71	8614.43	15188.4	11285.7	9606.79	7650.69	6069.45	5747.93	14517.7	9659	7176.1	9366.57	9567.13	6975.22	9488.62	6917.75	10113.1	6806.53	4681.38	5015.37	3762.99	5356.61	4638.49	8513.62	5796.56	6122.5
X105.1.95	M105T95_2	1.11559	-1.41556	0.160196	105.07	105.069	105.072	94.7371	92.6464	97.3842	46	20	26	5868.55	7452.17	7040.71	16236.9	10641.3	8330.48	8264.09	8203.64	7001.55	8203.67	10376.2	9934.57	13140.2	10327	8486.06	2784.6	5441.82	3560.22	5900.71	3493	5789.05	6998.26	5814.01	9860.21	11320.1	11076.5	12255.2	10949.7	6074.15	4990.52	7386.53	8570.76	7394.3	9992.89	6451.71	6107.86
X105.1.392	M105T392	2.02669	-3.18712	0.00202168	105.07	105.069	105.075	391.507	390.194	393.472	102	51	51	452163	784002	593084	480477	833344	429902	475251	399536	585798	452347	614621	360223	677156	116210	494522	40329	53359.5	54483.2	49743.5	65436.7	59783.6	63402.2	50622.4	510439	374264	558073	461469	412351	50077.7	38200.6	395673	360061	61139.3	59050.2	49105.2	41754.5
X105.1.20	M105T20	1.01336	-0.0846246	0.93274	105.11	105.109	105.113	20.0527	18.0941	21.5966	53	20	33	4144.18	9940.02	12815.2	28267.5	70784.7	24906.2	6648.27	9245.84	3284.81	12252.5	10499.6	7448.74	11592.2	63424.4	35876.3	17598.7	13336.1	7148.47	9166.39	25270.2	27963.7	10143.4	30663.6	12438.4	15680.8	17144.3	12431	10013.3	13967.7	9284.05	10335.9	6812.76	44051	34513.4	42471.8	2462.35
X106.10	M106T10	1.08101	0.860064	0.391838	105.996	105.994	105.998	9.58496	-0.00755091	20.8099	90	41	49	313189	89360.7	363214	264528	127384	107685	100675	97900	0	135899	143139	108997	149522	252244	0	254461	190038	192331	231297	179647	216761	291698	177095	97666.9	0	0	27422	207471	207201	176017	70401.8	0	153333	161241	210832	259459
X106.1.51	M106T51	8.39595	8.95406	5.36549e-12	106.058	106.057	106.059	50.9845	49.0053	53.5285	39	0	39	2343.6	3319.57	4225.46	5360.28	4758.92	2875.14	4163.8	3309.26	5128.86	5329.13	6579.39	3044.05	7319.12	2789.4	5390.37	2039.02	2306.33	2374.49	3041.67	2251.55	2427.12	2735.87	2970.24	3669.21	4287.65	5699.32	4006.71	3287.14	2495.2	2009.73	2650.06	3796.13	2330.33	2402.45	2786.77	2720.97
X106.1.392	M106T392	2.79007	-3.24892	0.0017042	106.073	106.072	106.076	391.589	390.194	393.671	75	32	43	204118	151272	100332	195777	166505	213257	95118.8	70453.4	126178	81044.4	129582	52254.9	149097	8573.84	98618.6	4932.5	4681.33	4530.9	4449.23	5550.52	4931.47	5074.85	4721.87	121357	164596	100627	86373.1	67205.5	4275.43	3610.17	72681.3	64972.2	5867.27	4972.57	4510.1	3084.96
X107.17	M107T17	1.19558	-1.14166	0.256331	106.951	106.95	106.954	17.2807	8.78545	20.1314	69	35	34	32415	54311.6	53769.2	85536.8	125571	163439	61409.3	118320	19533.3	109111	75635.7	100189	130664	14260.5	0	53387.9	33774.9	51215.8	32765.6	48325.4	40901.7	52376.9	29832.2	69788.6	128557	105874	101853	102075	30822.6	25159.7	49853.4	0	87324.1	86307.2	49618	0
X107.10	M107T10	1.15005	-0.930552	0.355085	106.996	106.995	107.003	9.56095	-0.00755091	20.8099	81	35	45	57970.4	78500.1	8100.49	140292	188849	194104	47060.3	25298.1	0	176915	92017.5	5226.56	178590	71688.3	0	39720.8	46656	38100.3	36092.9	52712.8	40627.8	62579.4	47800.7	94488.1	0	0	0	42070.8	40122.7	33254.9	31387.1	0	31041.2	54071	46177.3	34096.4
X107.95	M107T95	1.35202	-2.43339	0.0168576	107.049	107.048	107.052	94.7758	92.6298	97.3842	100	49	51	59002.6	86214	103039	203563	156171	70034.4	73101.3	79525.3	88328.3	35870.9	69009.8	65776.8	108836	52986.5	143986	26244.9	25994.6	27636.7	26588.9	24560.6	24066.7	35926	24544.9	75446.4	69568.7	89235.7	83212	68276.9	30441.6	32895.3	57706	67855.8	43604.5	53122.6	45914.3	45612
X107.359	M107T359	2.14866	-2.97133	0.00391788	107.049	107.048	107.053	358.763	357.127	360.01	92	44	48	521411	517399	408005	324391	345806	382469	218239	760900	479578	610896	454165	351067	429967	69681.5	467681	20903.1	16276.9	28985.9	25998.1	27312.2	42368.5	51257.1	48674.3	341534	352757	357543	399515	332881	58938.8	47607.1	491761	229322	24073.6	28464.6	13688.5	18256.9
X107.408	M107T408	3.94893	-3.66969	0.000520761	107.049	107.048	107.053	408.194	406.492	414.487	69	26	37	277520	222645	87164.8	198663	344326	340044	13000	365302	210054	221289	56404.1	69666.5	58900.3	19653.8	189844	5128.16	5149.71	6997.82	8976.8	6043.11	7985.88	8974.71	10697.3	98365.6	64073.2	95977.3	116787	70576.8	13954.5	12955.2	153210	179488	11326.6	13001.3	5219.73	6209.42
X107.293	M107T293	1.49077	-2.06921	0.0422117	107.049	107.048	107.052	292.534	291.181	293.743	56	26	30	33389	12874.8	21773.2	64565.3	26145.6	26501.6	10447.4	16091.4	11372.6	13493	18249.5	12989	16548	8775.73	18861.5	4936.57	2685.34	5238.59	6592.52	6533.57	10337.5	12695.6	12039.7	15154.4	12983	11995.1	22881.1	13408.1	8626.02	10954.5	9466.71	7335.89	3252.83	2526.42	2812.26	1979.16
X107.1.268	M107T268	1.55756	1.73012	0.0878806	107.07	107.069	107.071	268.152	264.857	268.951	63	26	37	6642.65	7468.15	10334.9	11961.1	20938.2	6595.74	12269	26980.5	23656.4	26716.5	46203.1	13743.4	34267.6	10384.6	14311.4	17471.3	7115.12	12216.1	6465.45	5586.7	3646.82	13116.7	11296	6490.18	6142.05	6026.6	11148.6	3947.99	5079.18	3868.92	45267.8	8283.38	79031.8	15119.8	75425.5	93889.9
X108.74	M108T74	1.1761	-1.34137	0.183349	108.042	108.041	108.045	73.7785	67.7486	75.131	75	31	44	31186	19769.7	30160.9	46592.5	55992.7	24814.4	25681.9	20196.7	23770.2	25604	16926	36876.9	41195.9	14804.9	56514.2	46465.6	25340.7	47447.9	71607	66083.9	110217	27369	26453.2	28597.5	25725.8	34072.4	49201.5	23491.1	31611.3	36866.4	17014.8	11841.3	12232.8	11250	26348.1	35449.9
X109.1.194	M109T194	1.05472	-0.302747	0.762712	109.101	109.101	109.103	194.022	192.508	202.273	64	25	36	7636.8	4881.77	10526.6	14131	22467.1	10661.7	20860.3	33096.5	12982.4	17727.7	23241.9	18703.1	80110.7	38631	41844.7	12141.2	9085.04	16154.3	22604.2	17919.4	24765.8	33707	42665.8	16599.4	13123.9	10094	24620	5389.34	6357.59	11468.2	4243.2	5165.09	19868.7	7432.93	12471.8	14140.3
X109.1.280	M109T280	1.32756	-1.29705	0.198123	109.102	109.1	109.104	279.705	278.213	281.128	54	21	33	9471.5	8207.32	37366.2	59694.8	102566	50106.8	26211.8	66804.5	2163.48	49383.9	60836.6	26661.9	121059	26280.5	23289.4	11887.9	13829.1	10050.5	12336.4	20042.6	13891.7	52347.5	33125.5	23732.6	23763.4	21412.2	37008.3	7267.48	8698.31	5953.79	6483.63	13884.1	14766.1	4157.82	4926.09	6761.64
X110.44	M110T44	2.74235	-3.49397	0.000764644	110.035	110.034	110.035	44.028	35.422	46.5216	96	30	45	854047	840585	836260	866027	1.15796e+06	805024	644477	753720	858655	755827	819208	771474	966095	48132.9	1.00318e+06	41927.5	20797	21946.2	60881.4	43263.3	13347.9	25131.4	26734	571757	881888	685938	737779	803718	44715.8	19220.4	330992	703418	43084.4	45620.1	42846.4	52904.1
X110.79	M110T79	1.82695	-1.96273	0.0526886	110.035	110.034	110.038	78.8378	77.1935	80.7086	49	17	32	31935.7	21225.8	21492.8	48106.2	16917.9	5955.72	14583	53808.1	17875.1	37398.6	27274.8	46922.5	82162.9	13683.7	150530	5081.34	3315.91	5099.6	4922.46	5858.17	6102.64	4161.97	4066.52	59285.5	49000.7	57458.4	63203.8	50573.4	9036.95	4052.1	50741.8	78921	2722.04	5286.66	4670.93	3776.96
X111.32	M111T32	1.04919	-0.268437	0.788959	111.008	111.007	111.013	32.0292	27.3269	38.9469	92	41	50	1.75699e+06	913518	661987	1.40543e+06	1.13661e+06	886542	1.00711e+06	1.06299e+06	1.04318e+06	1.97233e+06	1.12157e+06	628198	455634	756204	1.45427e+06	331745	298720	586500	356551	391995	416486	672281	617244	1.81329e+06	720603	724433	652117	874581	861074	410266	577025	862170	5758.86	6380.81	4170.02	7928.99
X111.10	M111T10	1.12116	-0.531576	0.596251	111.041	111.041	111.042	9.68858	-0.00755091	19.8109	68	30	38	27496.1	42395.5	38357.3	45928.8	304333	113253	46550	104022	0	32138.5	56704.3	35149.5	178734	30997.4	0	37665.9	48129.6	37827.5	32312.8	38571.3	38848.1	28258.5	16169.3	67887.9	0	0	0	70828.6	24257.2	18178.6	58593	0	21023.6	25106.4	42917.2	28275.1
X111.1.211	M111T211	1.69623	2.42096	0.0179923	111.081	111.079	111.083	210.988	203.643	215.17	86	38	40	8419.42	6798.32	2360.69	22530	80057.2	37966.8	57069	89820.7	15251.7	109958	157218	3265.63	6676.92	219019	3356.3	19065.1	53894.6	55183.9	35826.3	78256.6	66824.5	215643	64565	25898.1	36623.4	35488.9	151868	15862.4	33623.1	19667.9	7746.43	28766.8	147155	23105.5	30517.1	11061
X111.1.197	M111T197	1.04318	0.251392	0.802043	111.117	111.116	111.122	196.591	194.221	197.808	90	41	49	33679.2	12388.2	37344.7	44104	78762.5	16970.8	16080.3	125208	42054.1	37233.8	49379.3	29611.2	81637.2	196470	91312	110952	52389.4	96765.8	171349	147951	193293	235719	231678	32120.7	19619.1	21665.7	69500.8	16436	41825.7	57155.5	16704.2	8463.6	27637.8	18577.8	87071.4	89001.8
X112.33	M112T33	1.02976	-0.258437	0.796634	112.011	112.009	112.016	32.6424	27.9974	38.7455	65	26	38	61452.3	24516.8	16653.1	82212.4	62562.8	49964.3	54126.3	58533.9	43673.1	62816.5	36739.9	66619.1	58749.3	38055.9	69010.9	16489.3	16246.7	30891	17505.1	21589.2	24794.3	37070.8	32172.6	59899.8	20705.2	42750.1	45253.2	46912.4	29889	41249.1	27205.4	35453.4	27738.7	15429.2	19655.1	10752.2
X112.1.16	M112T16	1.74623	-1.76976	0.0799968	112.112	112.111	112.113	16.1881	8.18545	19.1122	41	13	28	113289	304080	202665	62075.3	373025	179440	135853	201556	32389.7	89158.2	226644	199691	347993	10031	21317.1	10312.3	4454.03	25923.4	20003.2	9976.43	8328.58	1492	14484.7	154617	200902	75370.6	139849	200434	26268.2	18721.9	145413	8152.5	15218.5	8058.72	2049.45	0
X112.1.139	M112T139	1.02371	-0.248417	0.80433	112.112	112.112	112.114	139.256	134.673	141.47	50	29	21	3643.81	4648.83	2964.63	5296.45	5215.57	2906.55	5030.79	6373.36	5341.31	4780.54	6806.89	4142.9	8437.11	8793.15	13773.4	6947.43	2399.89	9149.04	6356.84	4528.19	4891.13	6859.18	6010.03	7261.91	6499.84	7942.47	3481.4	5041.37	6626.87	5649.91	4120.67	4762.76	7863.67	3485.24	4391.79	5899.57
X112.9.19	M113T19	1.10606	-0.750219	0.455177	112.897	112.895	112.901	18.7375	10.3854	27.5371	79	39	40	241245	765191	807651	1.02943e+06	1.06097e+06	969538	429036	524103	393236	549195	474664	44255.2	544454	405217	87607.8	355030	583198	265283	290779	348482	315731	1147.84	386102	487076	242318	504295	736594	445878	288023	257052	351557	3139.95	373623	488289	127187	959.42
X113.36	M113T36	1.22318	-1.17031	0.244761	113.021	113.02	113.022	36.2168	34.3546	37.2006	62	25	37	13613.5	11866.2	19877.6	35882.5	50145.3	15139.2	29729.7	11676.7	14034.5	12145.1	14882.4	42518	19945.2	15676.6	18307.5	27177.4	21718.1	41688.8	62666.6	31635.3	35734.3	8262.94	29258	11533.3	28950.2	12051.2	17198.9	15740	6497.71	13218.3	9787.52	6934.72	18762.1	32666.4	22218	35351.2
X113.66	M113T66	1.10014	-0.879319	0.381464	113.035	113.033	113.038	66.4829	62.0554	69.0663	98	47	49	86179.4	29320.7	24695.6	37358.2	70425.9	22199.6	146178	46246.5	58464.4	62334.2	78382.8	65968.1	125960	93570.7	80448.8	72017.1	27304.8	28119.1	56857.5	89753.1	36132.1	24405.1	54615.9	16187.1	34251.5	50202.6	52971.3	46845.8	58469.4	18453.2	17606.4	24592.7	61563.5	172192	204823	50869.6
X113.59	M113T59	1.08779	0.640159	0.523783	113.035	113.033	113.036	58.6179	53.0429	60.0436	52	20	32	19115.1	18110.8	14093.3	23870	42532.1	11084.7	2887.69	24427.2	28328.4	20371.7	30135.8	31737.1	67360	67673.1	48917	43148.4	13585.6	14181.4	36904.7	56798.2	24507.5	11508.2	22402.8	24472.1	21800.6	17883.8	31311.6	24789.6	17740.4	11874	11697	17774.4	36072.6	68629.9	78175.4	39588.9
X113.1.160	M113T160	1.04337	0.272714	0.785675	113.096	113.096	113.097	159.682	157.974	160.292	75	30	45	10325.3	7373.8	6283.01	8822.44	18263.5	8000.89	12337.3	28182.9	9983.3	12194.7	21853.2	17561.4	61820.9	48251.3	56897.5	74267.6	25269.3	45455.4	48653.1	57812.4	54057.2	134343	34530.1	18440.3	10063.3	13847.5	20448.1	6255.72	18347.5	15162.6	7508.38	6493.25	32323.7	11284.7	30889.1	64584.9
X113.1.50	M113T50	1.08303	0.717612	0.474995	113.107	113.107	113.112	49.6512	41.9905	53.1784	86	38	48	10126.5	38769.4	31231.8	16865.5	33736	22260.6	56354.5	14210	25569.8	10224.7	32407.7	13614.2	24929.2	37020.6	14594.4	18755.8	13241.7	16344.6	18192.7	20690.6	21760.3	22571.7	22382	15212.8	15026.8	16646.9	17761.2	7935.95	15729.3	9498.97	6334.71	9350.08	18704.2	25835.8	28020.6	27367.4
X114.1.21	M114T21	1.00854	0.0815623	0.935159	114.067	114.066	114.071	21.2527	13.1874	27.9371	73	32	41	363884	426883	387858	1.13863e+06	283974	459043	614216	601113	529840	601768	480438	395439	675388	823637	1.06665e+06	188750	392522	334135	392314	434420	626971	20572.6	371861	644412	382485	478183	461830	403641	331721	333511	401491	706630	546742	751826	804545	1935.12
X114.1.114	M114T114	1.01027	0.0812499	0.935417	114.092	114.091	114.092	114.368	113.536	116.241	51	23	28	6471.32	10220.1	6727.12	14901.1	12370.8	5821.24	8891.38	8688.67	5545.78	6892.8	14110.3	8745.75	17376.9	53654.6	35002	19839.5	10888.5	23743.1	34267	28265	37242.9	46695.4	51072.4	13872.5	10700.5	13588.9	19743.8	8444.21	9445.56	18391.4	4769.29	7037.07	19462.1	12928.2	18050.3	10666
X114.1.140	M114T140	1.31563	1.36581	0.175104	114.092	114.09	114.097	139.811	138.82	140.845	86	39	47	362941	72740	69002.2	71870.7	68551.7	18471.5	8503.69	20806.3	10836.8	15013	12469.4	17227.6	25886.4	44418.8	30182.5	11706.6	18868.2	34873.4	24793.7	18215.5	24976.8	32874.4	31630.5	25027.5	16805.2	15690.6	215939	17844.9	97152.8	17782.2	10776.6	11877.4	25296.4	53189.7	101828	98513.4
X114.1.183	M114T183	1.16195	-1.00362	0.318047	114.128	114.127	114.131	182.768	177.721	186.279	84	41	43	13886.6	9488.4	6923.81	11325.2	10397	6920.44	4137.49	10898.5	6888.32	10140.2	8180.26	5909.65	20356.3	16503.8	37881.5	8800.31	19761.6	7293.24	6971.27	8550.23	10467.3	15303.6	6451.02	24673.6	7658.8	8133.12	8438.54	7160.34	7040.17	10971.3	9577.19	7105.71	20559.1	8180.57	11597.2	12482.1
X114.9.19	M115T19	1.23153	-1.32261	0.189541	114.894	114.892	114.897	18.7303	10.3854	24.4543	72	34	38	104619	424111	480023	654860	729344	570839	295362	387782	629030	714484	34532.1	229854	375296	258323	41106.6	287314	375111	144441	174063	190410	158950	1367.54	196476	298436	151703	141607	433423	306890	137823	123656	191747	2024.14	174330	253271	65098.8	1067.28
X115.32	M115T32	1.69359	-1.9019	0.0601055	115.003	115.001	115.008	32.4479	29.0534	36.6721	59	22	37	38580.5	22338	740537	42386.4	76948.7	95001.3	75472.6	361148	59294.8	281480	421427	464841	86556	35159.7	3870.01	603444	22114.4	24855.8	28753.3	33174.4	27183.4	41141.8	37663.6	305777	668105	56747.5	718067	31679.3	52314.3	21942.1	20743.6	239756	3.00972e+06	3.31613e+06	3.06634e+06	1.45347e+06
X115.51	M115T51	1.14164	-0.897751	0.371633	115.037	115.037	115.038	51.0929	43.2043	55.0186	55	26	28	258318	157980	307555	560601	484553	148272	286354	11776	474857	318955	578416	486942	977410	903636	549292	1.37077e+06	1.1682e+06	1.91851e+06	1.6455e+06	1.85671e+06	2.26732e+06	678715	883592	494085	394235	545960	542885	204680	982119	534440	287722	256481	1.64371e+06	3.44292e+06	1.71948e+06	821933
X115.23	M115T23	1.15484	-1.10995	0.270065	115.037	115.037	115.038	22.5376	16.0723	27.6557	61	24	36	1.484e+06	1.8865e+06	1.66872e+06	2.14827e+06	1.94858e+06	1.78452e+06	1.0525e+06	983245	707131	831694	974812	920586	2.22724e+06	1.53523e+06	1.07964e+06	1.30885e+06	1.32644e+06	1.32916e+06	1.41442e+06	3.83095e+06	4.18426e+06	956631	2.17333e+06	718052	1.05023e+06	1.27346e+06	1.13093e+06	376707	995984	1.1904e+06	495131	637482	2.98669e+06	3.07863e+06	2.95001e+06	2.72286e+06
X115.59	M115T59	1.2645	1.76303	0.0812572	115.037	115.037	115.038	58.9108	55.2215	73.7165	65	22	37	504123	417265	508787	937082	863610	261705	344268	554911	423188	406180	558456	567328	1.17812e+06	558712	476135	724304	640920	912345	768334	933208	1.2135e+06	1.48608e+06	1.09001e+06	653306	402463	669314	550250	247248	170601	1.19529e+06	350739	279226	416610	1.57371e+06	3.25757e+06	561840
X115.9	M115T9	1.29653	1.33756	0.184461	115.037	115.029	115.037	9.23515	-0.00755091	14.7884	53	19	33	2.02449e+06	63580.4	2.48496e+06	9.19795e+06	6.46688e+06	5.66515e+06	2.09847e+06	3.24753e+06	0	3.27935e+06	3.60549e+06	0	3.25651e+06	6.79951e+06	0	4.01407e+06	3.81012e+06	4.48251e+06	3.1868e+06	2.6484e+06	3.2161e+06	6.92025e+06	6.12956e+06	1.54768e+06	0	0	0	857050	2.85125e+06	3.28777e+06	1.98714e+06	0	6.70771e+06	2.58257e+06	5.92531e+06	0
X115.1.128	M115T128	2.09845	-2.80264	0.00615596	115.054	115.053	115.054	128.096	124.327	130.696	65	25	40	58535.7	70023.9	153412	174579	168408	74027.3	94295.7	92561.5	91895.1	69612.4	105708	59982.3	162182	20775.3	138711	9359.74	2326.5	3790.52	7791.17	3556.23	3822.31	8543.2	8768.67	97841.2	125580	124074	157941	96559.5	9194.4	8292.79	78976.3	129646	16539.1	13699.9	14282.3	16256.6
X115.1.21	M115T21	1.05421	-0.652456	0.515701	115.069	115.068	115.069	21.1601	12.9874	22.5966	42	12	30	8054	8824.77	9013.92	28243.2	18121.4	20369.2	26337.4	24530.9	21305.4	28768.8	18820	13932.4	19810.9	17583	30082.8	10966.8	21453.8	9538.03	20231.4	10887	15784.1	4937.76	12308.9	27553.8	16925.1	21146.7	17194.1	17433.3	14626.4	13478.4	19047.1	24494.3	19677.7	16402.7	24685.2	2374.81
X116.22	M116T22_1	1.2587	-1.65177	0.101736	116.04	116.04	116.041	22.1316	15.4675	28.0931	54	20	27	205916	206456	159294	310935	239161	199065	36968.5	161223	60586.7	95988.5	54801.8	80098.1	185855	67654.1	178295	49245.9	47037.1	76266.7	51510.3	60080.5	65567.2	34978.2	67871	59468.7	43908.2	81316.2	60775.6	30397.1	35971.1	42979.9	61637.8	44462.3	58768.8	309582	88466.5	57722.2
X116.1.22	M116T22_2	1.24458	2.30426	0.0233694	116.071	116.069	116.076	22.3722	14.5884	30.7381	101	50	51	33244.6	395324	19872	347305	20258.8	611914	858302	568905	652668	457773	720136	516302	946782	1.21485e+06	2.05708e+06	756283	860346	1.16371e+06	1.01541e+06	1.04675e+06	998583	208384	1.19016e+06	631342	647358	582265	541686	34106.8	694057	1.18735e+06	603866	1.05411e+06	849270	1.1666e+06	982207	189183
X116.1.46	M116T46	1.00774	-0.0665257	0.947093	116.107	116.106	116.108	46.2496	39.1542	49.3066	78	29	43	50511.3	33525.7	48378.5	56956.9	58769.9	29362.4	25593.9	23599.1	32409.5	16934.3	24918	27861.9	49568.1	91629.1	68482.8	32257.8	24110.5	33260.6	36181.3	42888.3	44188.3	28939.2	34155	53473	48910.1	54435.4	46439.9	24822.1	17977.8	27286.2	31126.9	25251.3	29627.9	26606.2	102492	85617.8
X116.9.19	M117T19	1.21181	-1.14732	0.254717	116.891	116.889	116.895	18.7375	10.3854	20.4845	73	33	40	9790.55	43257.9	43916.8	88123.8	93512.3	78888.2	18254.9	40883.3	27214.6	69001.1	3831.97	46605.8	51512.6	60087.8	5454.42	29454.5	19795	14656.5	18462.9	18627.2	33532.9	1671.38	20188.3	33931	17946.9	4929.11	84346.8	32743.8	14364.5	13801.1	21967	733.869	17047.4	24181.1	7461.73	911.449
X117.1.128	M117T128	1.93012	-3.04819	0.00301304	117.057	117.055	117.06	128.214	124.327	130.875	91	43	48	56837.7	63295.9	117311	127810	138641	69380.2	60588	68086.3	77501.5	51731.8	70090.1	55875	107183	26938.4	110353	12215.2	9473.8	8299.38	9218.25	8860.61	6374.48	10869.9	8842.92	89192.7	86614.1	87200.5	109567	69635.1	10556.4	10469.2	57043.1	88209.4	19130.4	13402	16882.7	17744.2
X117.1.22	M117T22	1.16322	1.33816	0.183882	117.074	117.072	117.077	22.339	14.3884	25.2633	80	32	48	61077.4	31416.6	43201.2	52217.1	42436.9	44164.9	123258	60284.6	73205.7	46232.8	80678.5	51632	95210.1	154461	132428	58642.6	88102.8	134343	91751.8	115794	112755	9917.58	161959	75066.1	69570.5	61769.2	50897.1	17314	61810.9	177796	72862.3	47851.5	74567.8	186777	72562.5	1703.36
X118.1.258	M118T258	1.82478	2.55952	0.0121792	118.065	118.064	118.069	258.1	255.489	260.164	46	27	19	30531.2	29342.2	43976.1	71807.6	81627.5	51576.5	47794.9	41921.6	46485.9	45119.3	65614.3	42723	181426	8038.09	14949.6	5175.85	175813	193393	4119.15	3119.25	228437	3823.85	253140	101694	123119	24926.8	19350.5	65416.4	104352	2183.88	22842.6	66107.9	2669.27	3819.96	5613.87	3413.8
X118.1.128	M118T128	2.20271	-3.11381	0.00248247	118.065	118.064	118.069	128.22	124.327	130.875	91	43	48	617024	650707	897873	954744	895290	592442	682551	703733	694055	514994	715666	491834	864609	118766	760887	60195.6	35827.1	34605.7	42399.2	39752.5	33206.1	44410	45760	687197	694348	671528	766671	586697	44821.9	45352.3	525590	51684.7	94091.8	69712.7	83674.4	93751.2
X118.1.94	M118T94	1.185	-0.573402	0.567785	118.065	118.064	118.07	94.1135	91.8256	96.98	76	35	41	52347.4	39350.8	79118.8	147394	148028	76531.6	68698.2	55072	71659.1	77220.3	82201.9	58549.2	161371	14266.3	77825.2	8594.53	2687.96	5672.93	7324.86	5979.66	4923.98	9593.82	6276.68	24347.9	21915.7	125739	123176	86720.6	3440.74	6934.49	16096.8	39386.1	11502.1	11601.2	12034.2	11113.2
X118.1.314	M118T314	1.15389	1.47753	0.142733	118.086	118.086	118.087	314.291	308.072	320.515	60	24	29	39558.9	43137.9	65337.6	174867	142160	123198	62620.4	48980.3	58057.2	73452.8	97083.9	61732.6	131939	133182	101972	191950	254852	212934	226632	231483	286254	250065	113737	127375	201901	154386	141818	122610	218986	261810	103321	107755	61207.3	218570	148015	121010
X118.1.53	M118T53	1.14165	1.43509	0.154531	118.087	118.086	118.087	52.6	47.4048	61.321	54	18	27	95023.1	137108	197345	372247	324431	177779	166684	119699	148731	138907	166242	125438	373984	404909	310847	269358	375902	410126	376265	386792	275777	349074	543366	228411	348456	319748	290121	173695	258368	361489	146184	199201	312849	391995	531674	316697
X118.1.32	M118T32	1.12335	1.72289	0.0881415	118.087	118.085	118.092	31.6904	27.965	33.5258	97	50	47	950428	1.93481e+06	1.977e+06	2.57362e+06	2.35199e+06	1.55263e+06	49607.5	2.13038e+06	634307	1.9886e+06	1.95066e+06	1.46992e+06	1.79634e+06	2.56381e+06	2.83593e+06	1.80445e+06	2.10176e+06	1.74889e+06	1.79757e+06	1.95433e+06	1.57827e+06	1.98655e+06	1.92123e+06	1.70917e+06	717600	1.71e+06	644357	1.41224e+06	1.67279e+06	1.90526e+06	780283	1.59422e+06	1.98152e+06	2.04265e+06	1.97274e+06	2.9598e+06
X118.1.24	M118T24	1.31851	2.4111	0.0177936	118.087	118.085	118.092	24.0229	19.1586	26.7706	94	46	47	29590.7	647535	240952	1.6346e+06	262378	903170	885553	584510	44032	684903	730773	348839	854604	3.09507e+06	2.09219e+06	1.90465e+06	1.8556e+06	2.20182e+06	2.15685e+06	2.05402e+06	3.29444e+06	4.02671e+06	2.23137e+06	42250.2	7437.09	843221	579288	300991	1.81221e+06	1.87767e+06	31672.4	65302.8	1.82137e+06	1.87069e+06	3.16418e+06	4513.98
X119.10	M119T10_1	1.77198	-1.64228	0.104016	118.977	118.976	118.978	9.55168	-0.00755091	20.8099	54	23	31	358086	532049	507687	37082.6	859598	539915	563918	503461	0	107186	711272	566350	992388	0	0	0	0	152633	193688	117530	19048.8	67412.8	54946.1	521703	0	0	0	1.12448e+06	15762.1	11267.9	622809	0	16136.4	32254.5	28054.9	17351.1
X119.10.1	M119T10_2	1.79719	-1.92112	0.0578619	119.008	119.007	119.008	9.98682	4.1531	20.8099	50	23	27	339526	508936	483643	34843.8	824831	519246	534933	483832	0	103387	684769	552077	1.00116e+06	0	0	30880.5	14604.8	142626	185925	113225	18301.8	24633.8	22011.9	498001	663749	169759	0	1.0753e+06	208889	41277.4	599528	0	32933.2	33572.4	40307.4	50357.7
X119.23	M119T23	1.15326	1.52119	0.131449	119.016	119.015	119.019	23.2736	7.58545	25.6634	54	20	32	5361.12	6589.43	7091.12	14301.6	8477.44	5803.54	25741.3	12588.2	9890.35	16421.9	23736.3	22935.5	14154.5	23077.8	26947.7	22666.4	10897.7	24373.3	26393.9	37637.2	17590.7	7465.22	31253	15068.6	11650.3	8100.58	20723.4	37165.9	11605	17162.9	13332.1	17380.5	11902.6	13689.7	12489.7	21453.8
X119.44	M119T44	2.98464	-3.63267	0.000502014	119.035	119.035	119.036	43.9824	35.422	45.2002	97	29	45	1.07766e+06	1.18533e+06	1.20566e+06	1.24816e+06	1.8868e+06	1.30712e+06	865134	830883	1.10482e+06	871428	1.10061e+06	839334	1.19694e+06	62144.8	1.11501e+06	58431.4	28896.8	30138.8	81912.2	60646.5	17828.8	36424.1	34056.3	582187	961734	692197	767071	899219	44507.6	29715.7	318567	782445	53569.1	65197.1	66055.5	71014.3
X119.79	M119T79	1.89212	-2.37132	0.0197992	119.035	119.034	119.038	78.8733	77.4784	84.3965	52	21	31	43691.2	31711.7	39355.1	71124.9	30330.5	21269	16545.3	52172	21780.3	43946.1	35475	46054	73944.4	13466.4	120970	4842.04	4571.25	4882.73	6491.57	4261.64	4533.38	4606.45	5471.97	54262.2	45240	56474.4	56080	52533	9141.26	3646.6	48430.5	73990.9	6029.11	4860.24	4235.94	6348.1
X119.60	M119T60	1.59207	-1.60958	0.112768	119.049	119.049	119.051	60.0111	52.1445	64.2222	103	30	46	12420.9	10161.5	13608.7	1.12354e+06	37932.4	136226	521200	178852	13849	11392.9	24012	194331	23823.4	121716	731699	92588.9	69507.7	82419.1	67090.4	31700.9	3945	115750	42701.2	492095	17749.2	11025.3	750927	309195	82006.8	75949.4	8700.51	9532.79	92253.7	97121.3	75458.4	158202
X119.1.128	M119T128	2.48145	-3.06353	0.00289708	119.068	119.068	119.071	128.021	118.313	130.875	67	28	38	79976.8	85260.3	168484	184586	177569	82789.6	100603	96757.7	98799.8	65328.6	101923	53082.4	138181	13483.7	140784	4470.48	9856.15	5582.21	4229.21	7733.04	4244.21	14890.5	4450.49	94742.9	99169.5	97073.8	123199	77401	3834.19	3774.69	59511.6	90802.8	6744.72	6415.68	7632.04	7440.03
X119.1.95	M119T95	1.46937	-2.45078	0.0161641	119.073	119.07	119.078	94.7287	84.3628	97.1821	88	41	47	20635.1	25244.3	34662.3	53610.6	52258.3	27337.8	22203.4	22043.6	26897.7	21860.5	20700.7	19898.5	29957.6	9753.86	40714.3	5851.17	5936.13	6894.01	5756.24	5094.43	11925.2	6642.32	6283.69	26459.9	21229.3	26595.9	26365.7	22483.6	7355.25	6478.82	18138.3	21458.2	8474.42	8698.52	9351.47	7952.59
X119.1.32	M119T32	1.15701	1.78122	0.0782449	119.09	119.088	119.093	31.6991	28.3249	33.9259	94	45	48	109323	129306	92294.2	207780	140439	74341.1	136941	64201.7	111388	98662.1	152941	97172.9	76614.8	316014	92855.7	196961	236618	164829	176011	198268	146734	273826	203230	146625	180630	74995	79975.6	127482	152240	186689	56741.7	114562	161764	201076	195828	178782
X119.1.24	M119T24	1.45581	3.53408	0.000645453	119.09	119.089	119.093	24.4047	20.9904	26.2375	79	33	46	79687.5	73588.9	69460.2	146153	120466	67635.3	98983.1	4099.22	5137.49	110891	42315.1	107421	128918	416396	227117	275510	274409	300848	292434	302326	265433	649547	254162	148697	111660	77737.8	57845.3	101082	232945	216594	96322.1	251883	123065	147069	129623	1535.56
X120.87	M120T87	1.04202	0.268569	0.788861	120.048	120.044	120.048	86.9977	85.9856	93.0299	68	28	37	6757.56	5699.78	13687.9	24601.4	17667.5	9238.06	11302.9	11228.4	7784.9	15578.1	7881.41	10826.3	22012.8	24121	27629.7	5895.31	6927.42	18160.1	8216.6	6562.29	13292.4	27164.7	29114.6	12643.7	19207.8	22913	29452.3	16905.8	12086.9	9282.99	8540.96	7348.08	4911.56	7012.17	6012.57	4635.68
X120.1.21	M120T21	1.46375	4.02082	0.000117808	120.066	120.064	120.069	21.1055	12.5874	23.0542	77	34	43	10385.8	11835.4	16639.6	32959.7	21518.6	27074.3	3483.25	20019	18959.1	11851.4	2081.39	13755.9	14035.5	33490.4	29057.4	21918.2	34767.4	15293.5	25411.5	23902.9	33290.5	36892.3	48850.2	9211.05	20471.4	19888.5	17591.8	27602.7	27797.1	26600.8	23037	6855.46	26448.6	28544.4	38767.5	1703.24
X120.1.95	M120T95	1.05173	-1.36013	0.176866	120.082	120.08	120.087	94.8438	92.6639	97.3842	102	51	51	1.8133e+06	2.07313e+06	2.11168e+06	2.49209e+06	2.37084e+06	1.71904e+06	1.31266e+06	1.5523e+06	1.79795e+06	1.56863e+06	1.54663e+06	1.41756e+06	2.30687e+06	1.57495e+06	1.80268e+06	1.33294e+06	1.33252e+06	1.38854e+06	1.32133e+06	1.26321e+06	1.25353e+06	1.46571e+06	1.26118e+06	1.47309e+06	1.46682e+06	1.65701e+06	1.58933e+06	1.40608e+06	1.31795e+06	1.43216e+06	1.35842e+06	1.48064e+06	1.53435e+06	1.70888e+06	1.59955e+06	1.64658e+06
X120.1.32	M120T32	1.09499	1.21832	0.226463	120.091	120.09	120.092	31.6942	28.5248	33.7259	65	27	37	9467.54	12895.6	16838.7	30798.7	32042.7	16825.2	15419.3	11533.5	11967.3	12051.9	15757.3	12269	18704.1	28318.1	18829.3	17870.7	22419.4	14676.6	18177.2	19229.4	18032.6	23699.5	17687.3	16585.9	19707	16840.3	17101.1	15226.7	13288.4	17557.5	10938.7	13284.5	15368.2	18116.9	19185.5	17507.6
X120.1.24	M120T24	1.17618	1.95074	0.0539053	120.091	120.09	120.092	24.4454	21.3904	26.3537	54	18	36	9515.64	10635.5	11402.7	22405.8	16741.4	14116.7	20350.8	16131.2	17884.4	15177.5	21690.1	21224.3	25239.8	37220.9	42235.9	25753	23883.7	25895.2	24949.5	26475.8	24374.7	57515.1	24669.7	28390.8	27844.6	18022.8	24794.3	29390.9	21574.3	21985.4	21041.6	23601.6	12853.4	13468.4	27139.3	1215.08
X120.1.568	M120T568	1.66027	3.44771	0.000980612	120.102	120.101	120.102	567.532	563.047	572.561	73	29	41	39727.7	13726.8	31333.2	23106.1	45374.6	25346.7	8799.8	62079.8	39506.9	46780.4	90378.7	11808.1	52744	123931	59655.2	47147	48812.1	48607	29762	41961.1	39875.1	20993.7	51720.4	21807.5	18642	30220.5	46704.7	37180.8	41816.8	51215.4	51186	38197.2	27242.4	15317.4	22461	54854.8
X121.9	M121T9	1.36138	-1.41876	0.15912	121.007	121.007	121.008	9.33998	-1.00655	20.8099	58	23	35	91078.5	136531	127310	72523.3	239118	162369	174941	118520	0	102686	173378	122277	324404	0	0	0	0	75147.7	83667.1	36509.3	16960.1	63206	57722.8	140563	0	0	0	274919	21950.2	20494.4	144090	0	38905.7	42257.4	50098.9	52308.5
X121.314	M121T314	1.51881	3.59232	0.000594589	121.014	121.014	121.015	313.928	301.087	320.313	52	16	28	141322	39839.7	94795.8	181490	135918	88616.3	29433.9	35904.6	35171.5	44139.4	57729.8	49962.8	118071	94629.6	115995	61506.3	171839	141212	149657	68704.7	149334	102124	109385	103598	121174	140786	155497	115125	247875	128360	122525	100192	68628	120899	120499	2841.42
X121.366	M121T366	1.6472	3.15134	0.00255139	121.015	121.014	121.015	366.392	358.958	369.918	38	8	27	138310	39152	106547	120335	101893	108823	16380.2	25900.3	31622.5	45367.9	43752.8	69882.1	158413	151915	99584.8	130510	107792	137716	120548	77775.5	184044	118439	88713.3	100435	159143	142907	146885	105483	258367	216554	144499	126203	76869.6	64432.2	119281	75793.1
X121.1.392	M121T392	2.06753	-2.89965	0.00470524	121.065	121.064	121.066	391.549	390.194	393.472	71	27	44	216651	413709	187216	305204	262818	329819	258254	238162	287628	184733	405444	172772	368806	53522.7	238269	13890.9	21760.3	19658.4	19717.3	22547.9	21654.8	24037.2	20119	191536	320189	266026	263842	217674	21903.2	16956	186506	188723	26722.2	18949.2	17814.4	18556.6
X121.1.95	M121T95	1.18339	-1.86288	0.0654684	121.084	121.082	121.088	94.8	92.6298	97.3842	101	50	51	414709	528302	637120	870920	818484	416846	331475	348831	454809	214381	398128	286601	521463	358961	612971	196113	205022	201973	189562	180694	179544	219076	147591	350439	350526	401830	439417	342205	198198	238973	288672	350090	302436	340734	338452	356153
X121.1.14	M121T14	1.35901	1.1926	0.236003	121.122	121.122	121.123	13.9049	4.6709	18.5262	44	13	31	34423.4	58485.5	32684	0	196342	244726	41881.7	27343.7	0	0	26101.9	0	102460	42431.7	0	0	0	77501.9	103741	49489.5	0	0	168143	80163.1	0	0	0	53758.3	68709.1	74630.4	33572	0	62671.9	34200.7	0	0
X121.6.76	M122T76	5.13717	1.3471	0.184006	121.602	121.602	121.603	75.5569	73.6756	78.1117	42	11	31	3796.74	1484.96	1684.34	2361.36	3780.45	2391.76	1026.55	3225.4	4582.29	2525.3	2498.77	3574.97	6979.93	9704.59	4717.54	3680.25	2421.51	6766.58	4323.51	3871.01	4411.07	7307.36	7041	3735.66	2516.01	3887.13	6766.71	4962.59	13364.8	3938.39	2760.18	2893.04	1280.48	1153.98	1555.07	982.548
X122.1.99	M122T99	1.09158	0.74829	0.45626	122.058	122.057	122.061	99.2953	98.2603	101.638	96	46	50	123723	56833	156782	178410	129733	58722	136069	57273.5	131556	104089	80368.4	268186	11830	371290	197986	402275	128780	377062	405387	509099	420807	309344	311515	123078	67688.6	136284	11058.1	70313.8	206869	176200	86260.4	48732.9	255743	50291.5	159700	307110
X122.1.95	M122T95	1.38934	-1.61804	0.110221	122.087	122.086	122.089	94.6849	94.3501	95.8944	48	28	20	49495.3	21124	50933.7	34533.2	51029.3	21909.7	11436.7	12527.8	40103.3	14497.9	12863.9	45250.3	125959	107184	51980.1	152071	30148.7	128294	90461.4	150947	42974.7	8811.39	123316	6325.16	12806.3	37670.6	93834.2	22363.8	50794.8	26079.7	10736.3	15688.9	8985.3	11537.8	10685.1	11069.6
X122.1.89	M122T89	1.03936	-0.261482	0.794315	122.097	122.089	122.098	89.3755	88.0538	95.3667	64	26	36	13522.7	16927.8	17165.4	810.418	36989.6	19200.5	6862.49	10454.2	16847.2	9532.04	14702.2	6392.97	18475.7	48667.5	42580.5	19702.6	8362.7	18593.4	26778	27659.7	31212.8	71129.1	63157.4	18439.8	6226.3	16039.2	21761.6	19061.2	24201.3	28968.3	11946.4	12013.5	14068.8	8343.58	11336.9	9855.55
X122.9.18	M123T18	1.36847	-1.71838	0.0889828	122.925	122.923	122.929	17.5893	8.98543	20.4845	74	35	39	35510	92747.4	122747	87201.4	237597	201809	157301	118227	26354.3	6218.98	182907	76071.5	197889	70408.6	5487.69	54317.6	125568	46477.8	68468.5	58325.6	65882.6	6987.97	60684.4	99463.1	178255	7426.28	143693	290452	61742.9	45311.8	120606	540.143	129446	215936	27976.5	6747.93
X123.12	M123T12	1.03206	0.208343	0.835413	123.003	123.001	123.008	11.8046	2.99245	21.641	64	25	39	11931.7	20674.7	14880	42275.9	28057.4	23321.4	28827.7	12607.3	0	17200.2	18709.6	17970.2	18882.1	25348.9	0	21184.1	22546.9	17677.7	19881.7	14299.9	19732.8	0	14072.4	29899	0	0	18253.8	80540.4	30988.3	18748.4	20626.8	0	10235.2	0	0	15538.4
X123.1.89	M123T89	1.15439	0.969221	0.334786	123.055	123.055	123.056	88.6943	81.515	91.5561	66	22	35	82739.4	87683	137863	168268	278579	102561	94601.8	89558.4	123632	114613	98254.4	83094.3	262600	487698	263889	262275	371799	255222	534496	1.03006e+06	238368	273453	306533	147160	132046	180919	163286	116807	220617	180870	101599	112348	183559	168197	324858	131797
X123.1.314	M123T314	1.09546	1.00188	0.318877	123.055	123.055	123.056	314.259	306.685	320.729	74	23	34	124368	83991.9	211216	347806	422547	194734	159552	185275	141699	201824	221108	91344.5	297527	172639	224658	287249	176198	157124	187686	364125	241367	456647	250678	170443	221962	231044	223485	177369	317315	300320	166648	163934	218010	108960	194058	92856.5
X123.1.283	M123T283	1.19301	1.01813	0.311609	123.056	123.055	123.056	282.854	278.159	288.807	39	12	26	122055	89898	215260	277607	488722	203868	205620	178454	179176	199442	246998	112498	347487	624119	301386	365597	442622	565212	1.11844e+06	775025	591834	552039	347723	170525	186229	250671	245555	161321	279595	617143	162433	167060	74789	138233	256717	149831
X123.1.139	M123T139	1.05424	0.327838	0.743818	123.055	123.055	123.056	138.857	129.286	144.878	58	21	29	61384.2	59015.9	112434	127875	202564	82887.6	80479.4	66746.3	78400	83592.8	74546.3	42870.9	193716	269083	187078	299500	251615	244706	500539	353013	605020	406343	215424	103508	91504.7	118999	120623	75831.6	147324	231482	71781.3	76817	195837	121255	246141	104772
X123.1.42	M123T42	1.00844	-0.205112	0.837942	123.056	123.054	123.061	42.3824	34.4685	47.7616	103	51	51	1.63134e+06	1.65531e+06	1.90742e+06	2.38581e+06	2.63332e+06	1.39162e+06	960005	1.37393e+06	1.342e+06	1.24853e+06	1.16367e+06	1.05495e+06	1.62271e+06	2.2855e+06	1.82959e+06	2.46703e+06	2.49193e+06	2.41665e+06	2.50324e+06	2.48958e+06	2.54617e+06	2.07349e+06	1.96356e+06	1.35156e+06	1.38499e+06	1.57175e+06	1.5286e+06	1.50069e+06	1.72767e+06	1.68238e+06	1.25386e+06	1.29433e+06	1.53085e+06	1.89362e+06	1.95776e+06	1.51259e+06
X124.1.42	M124T42	1.03243	0.446534	0.656241	124.059	124.057	124.064	42.2362	34.6884	47.6755	102	51	51	138162	175132	213733	321011	378391	137055	93824.1	124688	144956	150153	112026	86814.9	199838	489030	243424	392553	349685	389572	429369	406182	413860	348006	269978	170602	159622	196557	202503	194047	256600	224840	134890	143476	189634	321204	354035	175420
X124.1.188	M124T188	1.14606	1.58656	0.11605	124.076	124.075	124.081	188.271	186.714	189.712	78	33	45	12189.6	17280.8	15127.6	24296.6	33525.9	21942.9	15763.5	15588.8	14699.4	16588.4	15560.6	12702.1	29358.1	38343.5	29633.1	21123.4	14877	19547.9	22138.2	20729.1	13059.3	27317.6	23133.3	18548.3	16125.4	20838.6	21020.5	19642	14945.1	14125	11642.3	11608.1	8621.62	17946.8	20386.7	16128.7
X124.1.146	M124T146	1.20391	1.96041	0.0527968	124.117	124.115	124.122	145.947	143.561	150.872	97	47	50	17105.7	22184.9	30943.3	38165.7	43013.5	20728.8	9783.56	21520.9	9534.36	21371.8	26545.1	22137.5	40091.5	86723.8	56735.8	44707.7	27535.6	45302.6	46229.9	47699	46714.8	48412.8	47479.1	24114.1	18325.1	23768.2	15561	9562.79	22965.8	32000.5	18013.1	19576.4	37378.6	35824.2	48226.4	44855.9
X124.6.85	M125T85	2.20487	2.25388	0.0281083	124.591	124.591	124.592	85.3636	81.793	88.8676	43	11	32	7833.25	4205.18	3491.5	4705.75	9594.44	4043.63	1643.23	3153.7	6912.33	3172.72	3370.55	2486.47	7764.88	19278.6	5407.12	12315.5	5255.58	12388.1	12436.3	10275.8	8591.48	7752.04	9483.5	4194	3970.56	4858.27	9263.98	6259.49	8669.2	4214.2	6768.69	4863.11	1110.42	680.94	655.112	405.243
X124.9.18	M125T18	1.22735	-1.14126	0.256544	124.923	124.921	124.928	17.6074	8.98543	20.0387	65	33	32	15066.8	13343.9	17138.5	5291.18	27941.6	25423.2	20997.2	16751.6	4867.25	38601.6	3538.21	20921.3	27006	8239.12	2580.84	8505.66	8703.7	7407.37	8169.67	17109.8	15687.2	848.004	8247.18	15242.8	50802.2	1210.24	28861.9	19505.2	8639.57	6564.12	9306.2	1360.39	12182.6	15645.5	3233.58	711.47
X125.1.10	M125T10	1.09042	0.494308	0.622245	125.057	125.057	125.057	9.53768	-0.00755091	20.8099	74	30	44	4969.55	46656.2	44360	582095	167419	340499	39332.5	63221.9	0	233662	104493	246962	141262	621699	0	285781	294276	260234	278417	272849	278596	140418	119837	38571.7	0	0	0	46020.6	152161	187471	10579.1	0	81431.9	112966	142216	200347
X125.1.42	M125T42	1.03764	0.596113	0.552491	125.06	125.06	125.066	42.3239	34.6884	47.6755	85	38	47	7517.67	8554.62	11984.5	20333.7	21585.2	11457.6	7608.46	8341.89	7464.16	10688	8849.42	7009.98	13954.6	22405.5	13951.9	21157.6	20630.6	20030.6	22070.3	21496.9	22979.3	20753.1	17002.3	10615.2	10494.6	12735.9	13384.3	12612.1	13684.8	11902.9	8727.33	8920.91	11088.1	15718.8	17171.9	9378.09
X125.1.94	M125T94	1.32979	-2.02274	0.0458755	125.071	125.07	125.073	94.4258	93.7991	102.245	54	25	29	12036.1	9223.88	11421.3	18484.8	35465.3	20697.1	10870.3	16301.1	17498.5	31555.2	23421.6	8341.59	19101.9	18954.9	15438.7	11360.1	14911.3	13481.8	33148.2	13283.1	14121.5	19619.2	18433.6	11624.9	10308.4	13605.8	14216.1	12557.7	13242.9	12448.5	6285.48	7129.41	35337.3	52978.3	27640	26948.3
X125.1.212	M125T212	1.31404	1.25206	0.213579	125.096	125.095	125.099	212.18	209.262	214.397	76	38	38	9618.11	9264.73	26423.8	70686.6	339808	81985.1	2078.8	43684	36730.4	53116.2	64476.2	42599.5	4015.58	138945	28600.4	24912.8	44916.4	41853.8	30321.7	30863.5	26122.1	69021.7	135507	18306.4	26367.3	31061.7	22413.3	18536.1	31462.3	22644.1	8767.57	25429.2	107482	16729	18732	17033.1
X125.1.109	M125T109	1.23354	-2.608	0.010531	125.107	125.107	125.108	109.138	108.464	112.962	65	26	39	5396.65	4543.2	8170.99	12674.4	16289.8	12580.1	8343.15	10178.6	7451.72	10747	15245.6	7488.37	21367.3	12688.3	12168.8	7016.87	3629.98	9363.96	6508.26	6911.71	8046.1	7317.49	7333.93	8593	8234.79	8851.67	11125.5	6347.97	3989.36	2922.31	5132.34	6324.34	8786	9664.83	7251.69	6509.01
X125.1.146	M125T146	1.14027	-0.695161	0.48864	125.12	125.12	125.121	145.957	143.656	150.872	48	21	27	4910.89	3814.19	15692.7	26252.6	45531.6	28713.8	11385.4	13063	10961.9	15623.7	22791.3	6995.77	41959.2	8354.39	16069.4	4607.94	8485.72	9874.62	4453.58	11296	10644.2	4507.69	5273.84	10729.1	9554.83	6691.58	11220.6	5325.16	6632.72	3658.08	3371.4	4972.92	4355.85	3763.72	4702.59	4873.74
X126.1.9	M126T9	1.00461	-0.0233331	0.981435	126.06	126.06	126.061	9.26386	4.1531	19.8109	52	25	27	4474.21	6608.68	5535.13	46909.7	14957.3	27664.1	5412.01	6396.15	0	21796.5	10927.8	20299.6	13489.1	40707.1	0	18871.9	19332.7	19747	17490.1	20083.9	20669.3	9748.86	14349.1	6480.44	0	0	0	7446.29	12662.7	13749.1	3290.77	0	7306.31	7013.96	10331	17869.3
X126.1.194	M126T194	1.10493	0.507055	0.613524	126.091	126.091	126.093	193.743	191.909	194.528	71	30	41	6021.5	9652.45	6843.47	28756.6	22718.3	10777.6	7145.15	7191.87	8689.47	9170.32	8919.42	5993.13	11888.6	29795.5	31476.5	27260.3	11272.1	25725.7	59933.3	34988.3	34066.4	44118.2	39984.8	12620	8931.01	12136.9	19470.2	9212.85	21184.2	24534.6	8138.29	8261.34	12136.8	7092.81	17392.8	17553
X126.1.120	M126T120	1.44985	-2.00287	0.0479093	126.091	126.09	126.095	120.098	119.27	120.868	85	40	45	34215.2	45389	25719	58219.5	70074.2	19558.2	38714	26295.2	29048.5	30305	16877	57570.3	23024.8	33806.6	78409.8	8735.73	8464.98	8436.88	6993.78	7670.68	6647.91	11158.9	13343.5	50360.8	35707.7	35171.4	44401.5	26432	7461.35	8198.35	16688.1	38545.8	10606.2	12526.2	15439.2	10989.2
X127.52	M127T52	10.0872	9.73055	3.75699e-13	127.037	127.036	127.039	51.65	42.3319	59.4266	57	7	46	27301.1	34609.8	30829.2	58478.6	63067.6	44691.1	21854.5	19614.4	22002	30472	27521.3	24974.2	46689.5	93573.1	74773	44201.2	49307.1	48007.6	63304.7	60333.9	62747.6	90323.4	81836.3	47470.3	64039.8	57296.6	41830.3	35322.3	43993.8	37221.1	19116	39625.7	44763.2	53587.7	50332.5	77500.7
X127.391	M127T391	1.06859	-0.633666	0.527834	127.039	127.038	127.042	391.344	389.668	392.981	45	28	17	16797.5	15910	11307.4	22100.6	36849.7	22117.4	11018.3	5898.51	7016.37	9277.57	14134.5	12231.7	18545.8	9764.9	12062.9	7988.63	9914.1	8964.84	8342.18	9713.73	9573.07	8894.47	8047.84	10596.5	19299.4	13232.4	15568.6	15156.5	9845.9	7546.04	7336.5	11350.7	8148.22	6611.66	7911.54	6442.01
X127.1.280	M127T280	1.02808	-0.148245	0.882453	127.112	127.111	127.114	279.782	278.014	280.989	56	21	35	4788.99	5480.09	24165.9	38660.5	80991.3	46496.8	14875.3	861.538	22311.4	29067.2	1471.33	17367.1	30690.2	25707.1	22131.7	12137.4	7415.88	9186.11	17820.4	10165.1	13317.1	45064.3	42968.9	13866.7	14916.3	13355.8	21700.2	6107.31	8030.4	6730.54	5272	8869.62	16272.6	6368.84	6187.41	3986.1
X128.51	M128T51	2.85068	7.64127	1.88171e-10	128.04	128.04	128.041	51.3172	43.418	53.5285	39	0	37	10529	5115.02	10002.9	10362.1	24309	15777.5	10016.9	6482.15	11687	6521.67	9158.03	9860.84	10794	8614.29	18545.5	5333.94	4778.57	4546.4	5745.07	5367.18	5453.07	7348.81	7187.17	8057.07	12582	8927.75	12052.7	11626.3	5065.49	3562.31	4764.12	6607.44	4538.03	4694.8	6354.75	4713.61
X129.32	M129T32	1.21754	1.30951	0.193387	129.019	129.017	129.022	31.8129	27.2781	36.0721	100	49	51	3.17848e+06	2.29652e+06	1.55573e+06	2.78642e+06	2.42647e+06	2.14025e+06	2.81692e+06	3.23129e+06	2.61891e+06	4.51957e+06	3.11916e+06	2.34871e+06	2.69441e+06	3.15517e+06	3.67951e+06	2.19168e+06	2.13914e+06	2.49994e+06	2.70972e+06	3.25458e+06	2.54116e+06	5.47305e+06	3.0223e+06	4.7332e+06	1.81541e+06	2.02133e+06	1.94426e+06	2.59507e+06	4.83894e+06	2.22267e+06	1.74214e+06	2.168e+06	17640.7	10926	15460.2	8634.62
X129.1.391	M129T391	2.29929	-2.96198	0.00396378	129.055	129.054	129.058	391.479	389.668	393.182	62	29	33	73809.6	104632	45337.3	113423	86814.1	102926	63543.3	48227.2	63367.2	42627.2	76709.2	37233.4	94603	7829.91	59495.9	5191.97	3399.77	5809.41	4941.88	6431.11	4580.46	7173.09	6566.84	25648.5	69121.1	58229.5	47003.1	42740.5	7914.69	5762.99	34962.1	33043.6	4361.92	2632.72	4376.32	2591.14
X129.1.76	M129T76	1.14077	-1.33461	0.186278	129.066	129.064	129.069	75.641	73.0135	77.3126	95	45	50	11524.9	53170	17307.6	1806.99	27995.4	17091.5	18357.3	13336.3	53718.6	1493.14	17497.2	19302.9	22435.9	45625.7	22913.7	15189.8	10146.5	16595	11587.9	16594.8	11261.9	34058.3	19413.3	34167.1	10352.9	44565.8	19676.4	11652.8	11381.4	8191.78	22295.8	29592.5	12307.8	22458.4	16795.2	15036.8
X129.1.22	M129T22	1.24872	1.4116	0.161462	129.066	129.064	129.068	21.6038	13.3874	24.0533	66	23	43	13795	27077	21738.3	83020.6	67239.7	61801	62093.5	87286.4	38404.1	95402.3	122481	37314.4	89554.1	227026	167722	20180.6	40450.7	245359	96191.2	120511	115125	9329.3	164375	78512.9	29111.6	31303	72023.7	110292	168179	202728	133381	50405.4	196070	129656	66380	24157
X129.1.196	M129T196	1.3716	-2.10557	0.0378552	129.127	129.126	129.128	196.276	194.904	197.245	60	22	38	22384.3	20614.9	27984	38979.8	55071.4	23099.4	12671.5	34078.3	21379.7	24987.4	26736.4	18366.1	49271.3	20649.3	39722.9	17193.2	9566.49	16764.1	26144.6	23963	30685	35556.7	35546.2	18687.1	14199	14818.3	32722	18711.3	8220.06	10544.6	11191.9	11518.3	15066	7073.24	9561.88	8851.16
X129.1.16	M129T16	1.34258	1.3968	0.165889	129.139	129.137	129.141	16.4344	8.18545	20.0387	73	35	38	272275	163133	137559	17201.6	358556	54827.6	124231	57469.7	66482.9	19573.5	69245	47763.6	124683	42379.4	366351	20894.9	26247.4	53009.1	104528	76103.3	26365	48222.1	96249.8	141926	55070.2	59994.8	34611.9	71683.6	129566	52297	105545	142526	31501.8	15600.7	93722.2	0
X130.33	M130T33	1.09489	1.05585	0.293632	130.022	130.019	130.027	32.5199	27.2873	38.7455	74	32	41	176822	123927	81705.6	202885	147465	141567	174726	164507	134150	166025	171414	130303	177687	200890	252795	156167	108604	132848	115511	169960	145769	180535	161831	181817	95949.8	61003.3	114161	141587	302368	123243	50968.1	121529	61415.4	72220.9	141710	114809
X130.1.52	M130T52	1.07739	0.676628	0.500204	130.05	130.048	130.054	52.3555	49.5971	53.844	96	46	50	846614	986286	1.05409e+06	1.36154e+06	2.00014e+06	1.31519e+06	923855	648294	835437	832484	1.40993e+06	14027.9	1.75153e+06	1.572e+06	791597	769738	471030	334819	1.28763e+06	651121	255837	675017	953102	549107	1.05983e+06	813658	921093	853378	439248	357450	451980	677059	886541	1.54854e+06	2.14603e+06	823202
X130.173	M130T173	2.51281	-3.11892	0.00268674	130.05	130.048	130.053	173.368	171.742	182.342	92	44	46	98185.9	38618.7	77241.8	294059	340742	91966.2	119369	52246	74324.1	83673.8	162654	48891.5	44172	21330.4	196669	7809.19	8531.91	14711.7	9674.72	11360.1	4918.02	7762.56	8213.4	74867.8	57277.9	34256.7	59734.4	53956.3	17602.4	10566.9	42042.8	65786	30065.3	21071.9	41005.2	16225.1
X130.1.37	M130T37	1.21474	-1.30563	0.194691	130.05	130.048	130.054	37.2876	27.3188	45.0341	98	45	45	648621	900275	38948.1	1.04327e+06	1.22361e+06	96931.4	399777	725440	110385	324312	180592	34761.8	1.04688e+06	565422	1.50632e+06	619893	380778	310595	1.09514e+06	567437	184386	243155	359330	676894	460613	502079	572160	538814	214707	196035	459627	372273	958737	1.5376e+06	1.95025e+06	1.27854e+06
X130.1.128	M130T128	1.97516	-3.15878	0.00218416	130.065	130.063	130.069	128.443	124.53	130.875	100	49	51	114521	115685	227666	260928	231485	123277	119495	125778	117259	90353.7	125788	74635.4	170246	39184.5	154244	29202.7	20492.7	19122.8	18012.6	16362.3	15009.1	21654.8	20634.6	113720	56862.4	111397	151027	98303.7	17985.5	16985.9	76941.6	122283	23303.8	22464.5	22531.4	32082.9
X130.1.246	M130T246	1.93475	-3.23618	0.00167906	130.065	130.064	130.068	246.445	244.679	249.83	89	44	45	110954	50467.5	73606.3	65966	96430.6	47918.6	81040.8	39215	45719.2	46205.8	47884.7	49522.3	75232.4	19594.9	39258.5	21948.1	6899.5	7783.63	10768.4	12218.8	4738.03	5645.06	14310.2	26438.4	38859.5	39537.8	75787.7	31121.4	6864.76	5938.97	47497.2	24983.9	5559.17	11562	13411.4	13530.7
X130.1.283	M130T283	1.73588	-2.83338	0.00582751	130.065	130.064	130.069	283.154	281.331	284.652	83	43	40	46170.6	17612.7	26213.2	65818.4	70825.8	23845.6	4245.27	23651.5	32227.3	3386.45	56016.1	18523	31272.4	19572.4	33830.8	13584.9	7528.91	7236.78	9556.94	7035.34	4009.2	4717.75	3445.89	27249.6	16455.1	62042.7	41635.4	22000.9	15709.8	8784.28	74449.7	28296.7	9065.53	9721.56	9259.55	9445.9
X130.1.204	M130T204	1.19748	-1.45547	0.148813	130.065	130.064	130.068	203.658	202.351	206.886	52	24	28	12043	12606.6	14679.4	42105.4	36333.4	17499	12877.5	16331.6	12193.6	16944.8	16347.6	11186.7	29954.9	22823.6	23958.8	19613.3	6731.67	13229.6	16703.4	16509.4	7198.21	7020.56	4625.78	13789.6	17436.9	52369.8	21590.5	15336	20617.8	11494.7	32500.5	13668	7613.24	13731.8	9575.83	3297.92
X130.1.110	M130T110	1.22006	1.89981	0.0604979	130.086	130.086	130.087	109.999	109.13	110.839	53	17	36	21787	17758	25503.3	25415.5	49410.1	24297.1	11917	15879.1	20571.7	17165.1	20548.5	16673.2	57155.2	68361.9	42719.6	51421	34668.6	35112	37919.7	46181.7	36169.8	58315.5	60137.6	24661.7	25522.4	34487.5	34233	17647	32022.5	21064.4	14263.8	19485.1	14739.8	14901.9	18608.4	15090.7
X130.1.35	M130T35	1.00822	0.0646284	0.94861	130.086	130.084	130.092	35.0086	14.5884	37.6089	139	51	51	54986.6	76474.4	243306	12437.2	551204	4264.37	260057	5960.2	201861	73204.3	503947	8458.49	229513	672300	616111	487340	409424	780376	609665	754683	479585	485477	204605	178670	8376.07	293592	189748	7361.66	170527	431046	71416.3	4221	361209	388812	585964	367135
X130.1.80	M130T80	1.26646	-1.52203	0.131158	130.086	130.084	130.092	80.1887	78.8039	89.0401	52	27	22	47664.9	72219.5	91205.2	91157.4	94912.4	71505.9	63664.4	39745.1	56664.4	68920	94585.2	41806.1	128325	32355.2	175848	21286.5	19081.2	23090.6	34502.6	26324.5	28695.6	36718.4	29407.5	67217.5	75797.1	70987.9	57715.2	68529.8	26159.9	19466.1	39650.9	31818.4	28982.5	21733.7	32997	22110
X130.2.154	M130T154	1.0137	0.103952	0.917417	130.159	130.158	130.16	154.249	151.364	159.474	67	23	44	4012.24	4772.39	3632.42	28466.4	7998.79	3656.68	6771.68	3579.07	3752.12	4228.31	10083.3	6354.25	16008.7	31642.3	21547.7	8021.97	8618.41	12064	22749	17606.2	31384.7	23688.3	26120.7	30724.2	19122.8	8336.26	18262.4	9475.14	26492.6	11507.4	5947.54	6147.77	12567.1	36819.2	52627	17600.6
X130.6.80	M131T80_1	1.14622	1.88363	0.062863	130.602	130.601	130.603	79.9751	79.0396	85.8288	54	18	36	2810.05	3102.24	4684.09	5159.35	4357.16	4334.5	2309.05	2627.08	3508.72	3860.81	4660.07	2022.17	5007.81	6779.69	8317.22	4611.36	2794.88	5783.76	6562.41	4986.71	5508.89	6096.89	3837.39	3857.46	2756.27	3801.39	3151.86	3505.67	5876.14	4729.07	2322.34	2218.74	4620.89	4926.46	7041.58	3861.21
X130.6.36	M131T36	1.51864	1.79628	0.0767993	130.602	130.599	130.607	35.7635	26.3142	37.7269	51	18	32	4806.21	4363.07	3706.06	4620.5	7746.17	4068.2	9569.24	7177.17	6946.84	5935.34	5712.27	5559.12	14853.7	17868.1	6139.35	14453.9	6450.97	14856.1	10356.1	10312.7	9077.33	13452.5	19831	12423.6	8043.36	7510.55	12239.9	8453.86	9053.31	3489.52	10042.5	6625.74	1214.11	1290.68	793.945	606.731
X131.10	M131T10	1.96552	-1.87346	0.0648574	130.992	130.991	130.992	9.79602	-1.00655	20.8099	47	21	26	536698	871158	808557	33849.9	1.06506e+06	283108	773577	350841	0	26348.7	721687	161389	1.26073e+06	0	0	22403.9	30687.7	78546.5	103539	48558.7	32586.4	30232.1	34723	718276	100845	26194.2	0	351316	91385.1	118554	407814	0	24849.2	19952.4	25226.6	15846.6
X131.22	M131T22	1.64657	-2.25574	0.0272002	131.01	131.005	131.011	22.1832	13.531	27.7189	73	24	39	121649	575873	764691	279919	654162	263323	414793	173089	34155.3	37856.3	301345	87642.9	725860	72998.1	53233.8	93446	99258.2	69459	101494	91303.8	96926	27484.3	98903.7	397241	77468.9	88252.6	56927.6	146518	34840.8	86619.5	172401	22238.6	146625	230154	47157.2	0
X131.95	M131T95	1.07149	1.05292	0.295071	131.049	131.047	131.052	94.8387	92.6298	97.3842	101	50	51	52169.6	70144.6	84379.5	145117	121634	63196.1	52698.6	54115.3	70007.4	55732.5	56726.4	47850.7	93780.8	114608	101077	66043	64734	67727.8	60053.8	59921.5	56924.5	76935.5	52209.5	60884.6	58461.6	68191.5	76855	56273	70940.6	76863.9	21724.5	53884.7	89473.2	102088	96396	103052
X131.1.53	M131T53	1.1261	0.919294	0.360157	131.053	131.052	131.054	52.5198	45.0341	53.6916	74	31	43	31778	64942.9	47496.4	46924.6	97032.4	70279.3	52356.8	23716.5	38140.8	29748.5	52914.8	21714.2	91534.4	91121.6	33931	39330.8	26926.3	19502.3	71338.5	37636.5	16586.5	37195	51659.3	21706.1	62846.3	47284.6	38354.2	32260.5	25718.4	20548.4	18907.5	29891	45976.9	82897.1	123572	42014.1
X131.271	M131T271	1.19812	-0.959256	0.339755	131.049	131.048	131.051	270.655	268.636	272.597	45	18	27	10611.3	5654.49	15160.4	16331.3	13816	10569.4	6818.15	13336.9	9925	5254.09	31448.1	65698.9	14117.2	7873.93	10781.5	5981.51	5399.98	8654.98	54116.5	23753	5630.08	6723.97	5518.95	7127.67	9941.01	6497.03	15530.8	6038.59	5956.84	4092.96	4465.19	5346.18	8250.79	8567.64	17020.7	9852.68
X131.80	M131T80_2	1.18939	-0.725881	0.470066	131.045	131.045	131.051	80.4316	73.7668	81.9067	34	8	26	11357.9	3327.64	21437.8	28959	37604.3	30753.7	17345.5	12836.5	11499.2	13860.9	25973.6	36311.2	23970.1	15235.8	36945.3	6550.97	7596.65	7819.67	5514.17	8956.54	7939.5	5119.22	5303.32	22456.7	15858.1	28087.1	29689.8	21076.6	5550.92	5574.54	11011.4	14973.5	4893.91	5537.91	6216.69	8544.96
X131.1.34	M131T34	1.18663	-1.31708	0.190849	131.053	131.052	131.056	33.921	31.5088	40.4904	53	24	29	39408	52319.4	43696.2	69835.5	42160	55152.1	29525.7	48169.4	22032	52377	48983.8	34938	86756	28251.5	98631.1	33876.1	33140	41056.3	64106.2	50404.2	28304.6	14937.1	32134.1	51899.8	40476	43154.2	43577.6	34154.7	25032.6	39373.2	36635.7	33655.8	53662.1	101577	114036	68181.9
X131.1.35	M131T35	1.36082	-2.59427	0.0110137	131.089	131.088	131.09	35.3547	28.4385	37.4715	67	26	39	57584.8	68577.5	55072.1	96593.5	98635.3	68898.8	730.327	72128.7	58677.1	73693.8	66834.6	50766.3	105821	46430.8	135839	35006.8	27521.8	54131.2	43505.4	38886.5	20332.8	19903.1	47685.2	74892.1	53755.2	56336.7	58544	45476.2	14679.8	43015.6	57028.6	48805.9	73573.1	106802	44012.8	25210.8
X132.143	M132T143	1.03182	-0.243625	0.808028	132.044	132.042	132.048	142.762	141.614	144.278	98	48	50	15640.2	8442.97	34128.8	39481.6	31806.7	17284.3	9703.94	13801.3	16945.7	44911.2	18564.4	6023.04	19250.2	52876.1	83511.8	23587.8	26668.1	12062	13985	24575.8	4436.52	22833.8	21461.1	22959.8	26300.6	2855.54	38521.8	13515.8	18033.3	28672.3	16901.1	13215.2	13662	45193.8	39332.7	10842.6
X132.1.95	M132T95	1.10966	-0.38279	0.702692	132.052	132.05	132.058	94.7358	92.6298	97.3842	89	43	46	39683.8	6033.21	6871.19	11740.2	10621.5	86480.7	32011.7	30586.1	6121.85	5399.44	45488.1	5010.87	8958.43	11559.4	9509.59	6805	7063.3	6838.38	6435.4	5890.32	6428.31	7592.27	5758.86	5588.16	96279.4	73216	6748.5	5447.76	6972.8	7587.62	35118.4	5720.71	7698.25	9269.57	8227.62	9139.15
X132.1.22	M132T22	1.04878	0.60028	0.549739	132.077	132.076	132.078	21.9385	13.7874	27.9248	74	29	45	1.23671e+06	1.25445e+06	1.26551e+06	1.21889e+06	1.26311e+06	1.0844e+06	1.78982e+06	1.82482e+06	1.79506e+06	1.86484e+06	1.70467e+06	1.52577e+06	1.77344e+06	1.49345e+06	1.90734e+06	1.23307e+06	1.2132e+06	981815	1.19829e+06	1.16317e+06	954877	139893	1.31665e+06	1.94904e+06	1.42247e+06	1.47754e+06	1.33515e+06	1.28037e+06	892817	762389	1.53821e+06	1.81552e+06	900437	1.24762e+06	1.54447e+06	5114.26
X132.1.128	M132T128	2.13106	-3.9685	0.000162095	132.081	132.079	132.087	128.44	124.327	130.875	98	47	51	280991	278780	478273	525142	496545	325576	317740	310460	312540	174734	145718	165169	415654	119274	396146	69146.6	38980.6	38174.8	47543.6	46165.4	38151.6	45465.1	47859.3	295412	297371	299624	363133	268037	44727.6	46363.8	169425	276043	80035	68433.7	81432.7	88774.8
X132.1.68	M132T68	1.29843	2.35986	0.0203124	132.103	132.101	132.108	68.3696	58.0084	73.0909	148	51	51	3.1703e+06	65270.3	66742	2.55628e+06	79419.3	1.33367e+06	879392	939281	68891.5	64001.7	3.14117e+06	82051.5	1.11858e+06	5.89722e+06	1.4515e+06	5.80477e+06	5.92642e+06	6.31086e+06	6.14842e+06	6.19082e+06	5.83927e+06	4.68599e+06	2.50711e+06	1.36414e+06	71994.1	1.92631e+06	82187.7	1.81849e+06	3.09756e+06	2.98678e+06	214958	1.7443e+06	2.84057e+06	3.42771e+06	3.39081e+06	7.13895e+06
X132.3.69	M132T69_1	1.49041	2.05408	0.0429938	132.257	132.255	132.26	69.1651	62.4843	72.6924	46	11	35	6084.11	11363.8	24468.1	82359	65366.7	21009.8	12706.9	7022.5	8564.38	7937	10081.4	5910.65	21548.9	66441.3	32280.9	20793	18264.7	28967.2	21010.4	19954.7	16229.9	30610.7	17812.2	18922.6	23345.1	15244.7	28418.7	12255.7	24489	16217.2	4393.26	9406.86	7124.37	7817.38	7568.11	9935.62
X132.4.69	M132T69_2	1.74139	2.55586	0.0125329	132.41	132.409	132.418	69.3198	62.4843	72.6924	67	24	42	5318.28	8520.78	31058.6	89905.4	67235	21980.4	15150.7	5642.75	5381.85	10082.7	10542.5	9493.61	37716.6	72245	36415.1	23295.2	19770.3	34301.6	29141.8	28011.1	20169.4	42025.2	24168.9	36582.3	51101.2	26653.9	56864.6	19386.5	44880.7	23233.5	4480.95	10156.6	3481.28	7754.92	4333.35	8198.58
X132.5.69	M132T69_3	2.15257	1.99954	0.048974	132.481	132.477	132.484	68.7979	62.4843	72.9796	43	16	27	4665.23	7450.86	13537.5	102445	58682.9	14699.2	5841.35	4182.63	4527.69	3737.97	4258.5	3155.08	66384.9	162684	69423.1	4052.83	3419.41	8131.59	3301.5	3210.44	2396	45818.5	13429.9	7016.05	7800.56	4918.52	12111.3	5283.97	2886.54	7821.76	2290.89	3834.71	2361.44	2792.09	2383.49	3116.18
X133.38	M133T38	1.07931	0.771262	0.442394	133.032	133.03	133.037	37.7912	30.8544	39.009	106	51	51	249433	282778	127590	605362	313357	176382	174071	211318	168455	148827	80734.3	101961	214024	333087	338313	199379	293285	193626	196172	185761	279103	342430	208631	204901	79991.3	169396	197370	67963.5	248926	232506	4864.71	119819	341353	263466	301559	608774
X133.1.168	M133T168	1.88917	-0.86614	0.390386	133.052	133.051	133.055	168.177	157.835	172.629	49	26	23	7734.49	7721.41	11699.2	14495.9	19834.9	16274.3	620060	7124.05	6806.37	7459.43	7576.11	6957.78	17959.6	7611.38	7256.34	9859.59	5970.07	11290.2	15702.2	12858.7	12634.2	18639.6	17665.6	6742.02	6230.78	12683.8	13838.5	8977.79	8489.28	7421.11	6697.76	7222.1	8355.95	37277.8	5792.52	5302.6
X133.1.22	M133T22	1.0998	0.849512	0.397631	133.079	133.079	133.08	21.7449	13.7874	23.8533	64	23	41	63803.3	68596.2	72936.5	82911.3	86241.8	82847.8	183395	191799	162901	189805	131169	135447	153215	222325	258241	122609	116694	62237.9	91192.9	94612.9	59052.7	5968.2	120785	207511	126176	104103	111326	138812	61269.7	44667	113008	170063	57060.8	138547	234592	1359.54
X133.1.128	M133T128	1.52562	-2.55917	0.0122281	133.084	133.082	133.087	128.422	123.769	130.669	82	41	41	25204	25507.8	42178.3	58878.5	49269.6	34074.7	30371.2	26760.8	14151	19718.2	2427.24	26406.4	36759.1	12060.9	36385.1	8071.18	5010.67	6215.38	13998.1	5267.18	4615.38	5536.34	4836.47	27316.4	28848.8	26232.6	34475.8	10831.1	10705.2	10437.8	16505.9	24940	9110.79	7440.31	8936.46	9107.8
X133.1.69	M133T69	1.19442	2.00285	0.0480118	133.106	133.104	133.107	68.7979	62.4843	72.4926	87	34	45	198929	706427	884578	1.47797e+06	1.28441e+06	613541	189719	510579	616553	434536	537776	632547	652642	2.04935e+06	1.11954e+06	1.48091e+06	1.39756e+06	1.75035e+06	1.53548e+06	1.52154e+06	1.33581e+06	1.32065e+06	1.03259e+06	726798	909684	715169	1.00916e+06	592049	1.24416e+06	1.39282e+06	403441	718482	1.17055e+06	1.71243e+06	1.48528e+06	2.08457e+06
X134.23	M134T23	1.359	1.80605	0.0739267	134.027	134.019	134.029	22.5179	14.9884	27.9248	87	39	46	6296.4	6931.83	6804.47	75162.2	14511.7	22572.9	15777.6	5934.8	13872.2	184805	42811.3	57091.9	211325	302810	443208	388322	194993	172313	482231	294847	204126	27726.4	255737	149728	114927	23555.7	155123	111566	185196	102971	3825.38	114453	584913	388937	648499	2919.16
X134.153	M134T153	1.14736	-1.5004	0.136673	134.045	134.044	134.048	153.485	152.129	156.473	78	33	45	9342.89	6749.65	4487.36	17039.1	17391.5	12673.5	10668.6	10185.6	8895.78	10836.8	10019.5	5026.81	15102.4	13728.8	13798.8	7934.15	6356.19	5732	5340.01	5014.37	4319.2	7588.26	4808.92	10230	5142.48	3356.84	6282.61	9378.57	7268.93	4851.57	1815.94	8409.38	4204.7	5289.78	9089.34	7701.63
X134.1.167	M134T167	1.12601	-0.647019	0.520066	134.06	134.059	134.067	167.44	156.473	175.88	58	25	32	7495.06	10579.3	7017.71	9101.36	20106.7	6235.57	83857.8	4930.43	10377.8	11785.4	10059	5409.15	6587.54	9879.81	9808.56	7677.33	11511.7	10215.5	9782.1	7948	7734.85	7530.78	6466.73	9666.92	7163.42	8273.29	8762.49	7690.99	7635.97	12850.1	4863.45	432.8	6908.16	17465.6	6856.41	4503.38
X134.1.22	M134T22	1.01791	-0.198722	0.842928	134.081	134.08	134.082	21.7712	13.7874	31.0305	61	21	39	9123.92	8946.79	10051	13330.7	13195	12096.8	20691.4	21576	20007.5	22434.3	16574.8	19418.1	18723.8	20139.9	28852.8	11603.1	11240.2	10397.2	11028.7	11673.9	11317.2	4701.02	14077.2	25082.4	15405.2	14134.1	14604.4	16796.7	7335.96	12699.7	14782.3	19308.1	6212.85	11511.6	29977.9	1195.65
X134.1.69	M134T69	1.14582	1.82646	0.0710337	134.107	134.106	134.107	68.9737	62.4843	72.5244	88	30	45	37382.9	47325.6	55228.1	102542	88935.1	48796.6	38424.6	37526.2	44803	32479.4	43001.9	47613.9	68302.6	97197.4	77290.6	95727.9	91815.3	113099	94232.1	93679.7	87178	86754.6	69208	52014.7	62756	53968.8	68826.7	45860.3	83542.8	90276.6	32834.7	49618	65357.6	83197.5	91274.1	118025
X135.11	M135T11	1.04676	0.373541	0.70965	135.002	134.995	135.003	10.5272	-0.00755091	18.0919	81	31	46	25691.2	30217.7	4583.54	243670	235563	218862	38319.7	54665.1	0	59002.9	143496	117842	182282	52661.8	0	71968	67060.1	76838.9	115709	87775.3	87265.4	172717	164778	75155	0	63818.4	0	112887	64319.2	62609.6	116409	0	96814.3	80019.3	141516	0
X135.23	M135T23	1.21013	-1.15328	0.252174	135.03	135.029	135.035	22.517	10.9148	25.0623	70	25	42	23892.3	3962.81	42364.6	8826.31	7037.44	7823.85	25855.6	5653.37	5458.91	10439	7639.94	8221.37	14554.7	13216.2	17294.9	22017.9	9583.53	10015.9	21184.2	14585.6	7888.2	10086.8	12254.7	9674.94	9698.53	7193.83	11206.6	10173.4	5655.4	5591.99	8099.77	9737.84	26926.4	17484.8	39995.5	98743.5
X135.1.293	M135T293	1.06547	0.421935	0.673995	135.08	135.08	135.083	292.987	290.981	293.756	75	31	44	39116.5	16180.5	37600.7	79316	41301	52213.8	14066.4	34124.6	17207.7	32198	34623.9	16455.7	25461.7	35690.5	29410.4	22848.1	14355.5	24090.8	40146.7	38931.4	59420.1	70044.5	67634.8	20490.2	15054.9	21347.2	31577.3	17944.1	39277.9	51542.9	11727.8	9371.06	5707.67	5544.54	6080.85	8371.91
X135.1.359	M135T359	1.16334	1.19149	0.236305	135.081	135.079	135.087	358.69	357.127	360.01	100	49	51	196299	69870	52509.2	137365	161150	105091	23043.9	177235	69656.7	117760	65744.7	43647.4	74471.2	104925	77365.4	38595.8	29811.5	56097.7	48686.4	50563.3	77578.1	83151.8	81724.8	46330.6	48479.4	46123.3	74299.7	57117.5	93144.3	86269.8	83279.4	87753.8	36061.7	41165.3	21374.4	29770.5
X135.1.408	M135T408	1.1775	-0.872908	0.384819	135.08	135.08	135.087	408.201	406.31	416.705	103	46	43	66910.1	32300.1	22159.5	102722	102311	108070	11081.7	125109	53354.1	60019.8	119882	26733.3	70796.6	32713.7	53190.8	14672.9	8636.02	15574.8	14811.9	13962.6	17571.9	35002.2	25029.3	20543.6	15809.4	23337.7	32172.9	17878.6	24361.9	26744.2	33715.9	41849.2	19880.7	21627.7	5569.81	8662.23
X135.1.130	M135T130	2.44572	2.76192	0.00770031	135.102	135.101	135.103	129.832	128.495	130.427	63	26	37	68513.7	61339.2	58570.1	50488.8	92624.7	28744.6	20429.2	64322.7	69502	27650.8	36038.1	52089.2	101706	13069.1	10685.3	11657	5896.29	9680.53	10287.5	9605.53	7579.49	15988.8	10965.4	6150.86	4299.65	5137.08	7530.29	5037.18	3926	6938.91	46367	12215.5	33075.2	6722.47	30626.6	34615
X136.23	M136T23_1	1.00655	-0.0429639	0.965816	136.023	136.022	136.023	22.5543	14.9884	25.0375	61	22	39	11765.5	4054.36	4010.64	67481	52689.1	35049	18299.7	11703.4	8051.13	13724.7	16870	27352.1	30563.4	11002.6	33226.6	13907.6	7847.25	6544.21	19086.5	11056.1	8151.74	7055.88	9993.84	17850.3	15440.5	6611.74	21049.8	21176.2	8084.75	4177.99	12427.7	8409.01	22863.9	13809.6	23574.8	8381.58
X136.77	M136T77	1.51698	-2.46003	0.0156326	136.039	136.038	136.041	76.9491	75.8359	79.3104	48	22	26	4624.76	8384.1	12512.8	29725.5	27752.7	15536.2	8519.82	7118.94	8395.58	12904.6	12605	14580.7	21188.4	9899.72	23581.7	3037.86	3110	2342.1	5120.18	3109.23	1778.99	11304.9	4341.4	15832.4	21335.6	19750.2	16478.1	13241.3	3707.76	5253.43	7311.67	9730.56	7875.56	5256.2	15729.8	2642.8
X136.23.1	M136T23_2	1.12221	-0.641282	0.522922	136.042	136.042	136.048	22.8377	12.5874	25.6375	57	20	34	5923.61	4427.07	4150.01	49269.4	32607.7	43432.9	14822.5	9487.5	7206.88	9396.49	11561.6	22599.5	23922.4	18135.5	79788.2	19050.4	14918.8	15687.5	20098	20294.9	10787	13828.6	28914.4	10506.5	14617.2	6655.88	21064.9	20816.6	5520.11	8866.44	8637.15	8563.06	36901.3	30508.2	34959.2	11797.6
X136.1.75	M136T75	1.92774	-1.91085	0.0589335	136.062	136.061	136.062	74.8025	73.2051	76.5129	36	10	26	39975.8	124537	242652	310163	68109	52840.9	45648.4	132013	35572.9	174213	101299	76022	238636	23187.9	343653	10994.2	8360.73	10136.2	7919.14	10261.1	15943.3	10155.7	11298.5	199283	218172	265806	291791	274661	14120.8	13863.7	161325	139361	6330.46	7303.33	6606.76	6529.53
X136.1.92	M136T92	1.29431	-2.16115	0.0330734	136.076	136.075	136.076	91.5438	89.9192	94.7527	46	17	29	28359.5	25172.3	32832.8	62785.7	64978.4	30373.9	29781.7	30682.3	30290.6	33786	33881.4	22001.3	47145.2	26975.6	49992.8	13400.2	8528.82	11351.3	10890.4	9225.3	11278.1	27359.6	13927.8	36190.3	35527.4	38285.5	50289.9	39408.8	12565.3	13104.1	26101.1	28050.2	16237.4	17364.2	19211.8	15395.5
X136.1.60	M136T60	1.01755	-0.155905	0.876431	136.076	136.074	136.082	60.1047	52.231	63.1168	143	50	51	713120	1.01247e+06	553103	1.58342e+06	1.70953e+06	329488	918718	1.08513e+06	443910	684133	291445	127871	1.13653e+06	798601	1.3751e+06	701707	521361	645707	514993	408263	435969	896300	492666	1.00338e+06	452928	463697	1.49222e+06	614440	569207	552620	205867	925322	563001	755995	446367	780637
X136.1.359	M136T359	1.55105	-2.29793	0.0244484	136.084	136.082	136.086	358.674	356.972	360.211	56	20	36	16627	17799.6	27120	34828.7	56603	68308.2	32472.7	14174.7	33074.8	30936	46117.6	20475.8	28994.9	10146.4	40886.6	4516.97	3247.55	6089.44	6537.6	5728.78	8438.98	8346.28	7887.05	25641.5	10927	27969.7	31913.8	29999.2	9141.45	8503.32	15893.2	14949.1	3520.76	6006.88	3913.78	5799.15
X136.1.147	M136T147	1.27107	-0.724027	0.470744	136.112	136.112	136.116	146.713	144.361	151.435	48	22	26	24661.1	21063.3	25364.7	18720.6	24616.6	367176	9796.12	29128	10770	331772	345618	7336.92	32218.1	6312.55	49212.2	283427	4869.06	5943.92	21207	5202.48	187142	5829.42	488211	748735	10846.9	14279.1	51293.5	15905.3	5101.25	4275.37	309077	88599.5	5558.06	426433	8593.47	805631
X137.10	M137T10	1.00989	-0.0412674	0.967173	137.018	137.018	137.019	9.8016	-0.00755091	20.8099	75	30	45	106382	274518	221728	358153	332532	358522	293757	174573	0	103189	435649	510896	460721	204988	0	105658	106560	104332	88948.2	61473.3	92760.1	154477	114283	183633	0	0	0	875750	79639.7	100868	320314	0	141176	52808.5	175662	43793.7
X137.42	M137T42	1.04815	-0.635691	0.52643	137.047	137.045	137.053	42.2717	35.462	45.4429	126	51	51	3.57172e+06	2.11019e+06	3.02292e+06	3.15855e+06	7.50497e+06	6.24997e+06	2.95257e+06	2.95156e+06	3.22843e+06	5.12789e+06	2.73084e+06	3.07518e+06	3.69838e+06	5.56962e+06	2.8207e+06	5.24668e+06	4.49489e+06	2.39338e+06	5.73425e+06	5.2263e+06	3.81239e+06	2.37461e+06	2.44953e+06	3.94655e+06	2.4022e+06	2.68396e+06	2.1894e+06	2.52199e+06	4.96205e+06	4.03089e+06	2.27643e+06	2.53946e+06	5.73875e+06	6.22566e+06	6.02126e+06	6.12153e+06
X137.79	M137T79	1.03562	-0.539259	0.590912	137.046	137.044	137.052	78.6335	77.3467	84.8013	100	51	49	1.69426e+06	1.29647e+06	1.29078e+06	1.68307e+06	858683	717211	608428	1.45856e+06	760618	1.24212e+06	983606	1.4001e+06	1.98393e+06	1.50937e+06	1.68466e+06	1.11544e+06	796226	1.08035e+06	1.08201e+06	1.1812e+06	1.14705e+06	888112	858501	1.13888e+06	1.11032e+06	1.22038e+06	1.24169e+06	1.15229e+06	1.29044e+06	685102	1.11955e+06	1.32023e+06	709028	997746	969765	838840
X137.1.60	M137T60	1.01528	-0.135833	0.892228	137.079	137.076	137.083	60.1021	52.231	63.3166	124	49	50	61053.8	177550	39666.8	84536.6	74117.9	65021.1	4371.62	28494.2	68389	61966.1	51266.9	36473.4	100722	66336.7	184102	59783	45276.5	54652.2	43901.3	36638.9	38512.9	70004.7	43178.4	40021.4	120642	41198.3	91496.5	43404.7	51423.8	29145.8	18045.6	118331	46362.2	53780.2	37428.6	89321.5
X137.2.44	M137T44_1	1.02607	0.0892278	0.929103	137.203	137.201	137.207	43.8388	36.3129	45.2002	47	16	29	16877.3	16051.6	31076.6	46093.6	186399	63097.6	32549.4	5853.28	13625.2	13350.1	38986.3	6506.91	21404.7	18220.2	18550.9	14891.3	2906.22	3371.03	35782.7	14806.1	2117.13	3419.62	1782.16	4600.98	12753.1	6350.35	9152.75	12536.2	13273.9	2318.44	1825.73	5456.24	5029.41	6218.23	9630.99	5752.56
X137.4.44	M137T44_2	1.14085	0.3941	0.694418	137.36	137.357	137.362	44.0228	36.3129	45.0429	61	25	35	14949	15959.2	40158.5	59742.7	322718	77789.8	49828.8	4621.99	9871.94	19646.3	50742.4	15496	64228.7	12499.3	17234.3	16848.5	2278.1	2578.72	59753.1	21536.9	1504.14	2590.27	2479.29	7448.31	24296.2	9702.87	14180.1	16525	25703.4	1863.44	1314.14	6233.52	4736	10936.2	23252.8	3390.61
X138.99	M138T99	1.00036	-0.0033361	0.997345	138.031	138.031	138.032	99.3259	98.2603	100.143	70	27	43	12872.9	5668.43	13757.4	18063.8	24691.2	8242.51	11405.4	4689.78	9940.46	7641.2	7612.44	13289.2	22913.8	16601.4	8395.08	34133.6	10478.6	23767.1	24988.5	29695.5	20699.3	15135.6	22832.7	8772.45	6436.06	13811.8	14980.6	7607.67	10734.2	11299.1	7966.69	3325.67	9578.26	4593.44	11510.1	10459.7
X138.44	M138T44	1.0398	0.449422	0.654101	138.049	138.046	138.052	43.7824	34.962	45.0429	121	50	51	997643	52338.4	1.1899e+06	1.08004e+06	1.09367e+06	1.46554e+06	877977	601270	933367	757495	1.37477e+06	738021	1.13359e+06	822870	349762	1.20758e+06	500782	522550	1.73423e+06	1.20215e+06	292126	530304	534510	436517	763249	560594	619257	746593	853879	365558	197924	291319	828511	1.18646e+06	1.25367e+06	1.24196e+06
X138.79	M138T79	1.03096	-0.244087	0.807665	138.049	138.046	138.053	78.5756	77.3467	84.8013	101	50	51	180831	122281	140472	218287	55222.2	53693.7	38696.2	170420	51531.9	67906.1	82252.1	152137	182308	176371	274509	85888.2	52956.9	89103.8	71184.3	93685.9	96673	60516.9	56802.7	109562	93228.6	121809	125670	117275	125220	41680	107990	145686	37253.8	69400.8	60331.2	46681.9
X138.1.150	M138T150	1.07601	-0.789691	0.431577	138.055	138.053	138.059	149.641	148.436	151.155	100	49	51	12336.3	18217.9	22761.4	21359.6	35091	23418.9	14410.4	1565.23	15454.8	16019.9	7937.47	11034.9	28719.9	29085.4	32419.4	10727	5600.57	10441.1	12251.9	15905	10728.9	8224.17	8163.98	19047	27343.4	11181.3	23310	27979.5	10530.2	11313.5	14127.7	20264.7	10759.8	14716	13867.3	15311.1
X138.1.22	M138T22	1.29117	-0.990763	0.324199	138.053	138.05	138.058	21.7732	13.9874	24.4623	67	31	36	238298	98442.2	97492.3	132724	101010	74051.4	30324.4	14936.9	30329.2	256189	95191.3	26026.9	88084.3	15628.1	73627.9	9543.9	11806.9	19947.6	75240.2	17508	31777.7	3509.21	30574.2	14372.4	21295.6	31143.3	21789.9	14760.3	7097.3	16971.4	17204.7	34027.5	16306.8	29529.6	29626.9	4553.7
X138.1.239	M138T239	1.0225	0.203414	0.839231	138.055	138.054	138.055	239.079	237.113	241.536	61	19	42	13818.7	10950.2	19011.4	30779	35393.5	28615.6	12759.3	14391.1	11662.6	36429.5	20393.9	11724.7	30815.7	36687.1	31548.7	26038.2	15292.7	25101.4	21215.5	17431.1	17467.1	29032.7	22417.3	15671.6	23723.1	17985.9	35832.4	21892.9	14114.1	26754	17680.2	11090.1	6131.96	7661.14	7388.1	10071.7
X138.1.112	M138T112	1.93068	-1.76244	0.0810517	138.091	138.09	138.093	111.675	110.05	119.856	41	14	27	13453.3	24807.9	36139.4	256902	48836.1	179787	97438.6	25480.4	26653	102817	70653.9	24462.9	7344.5	16996.4	76539.8	9243.02	8799.36	8729.39	18032.7	11681.7	8937.38	12397.6	13347.2	88773.2	52542.2	86225.8	46983.6	173389	3689.59	5170.59	129685	79213.5	5004.92	8894.61	6532.28	4122.64
X138.1.101	M138T101	1.02429	-0.324549	0.746216	138.128	138.127	138.128	100.894	99.7922	104.361	75	31	44	6455.39	6412.24	7215.53	14259.8	18596.9	9932.93	7326.3	6584.8	7584.18	9944.34	10597.4	9433.1	13373.8	24520	19404.4	10811	7409.3	8612.77	12470.9	11969.5	13842	13415.8	15674.1	11067.8	10285.3	10965.7	13947.2	8907.27	10319.9	7601.48	11592.1	10532.1	15486.5	10025.9	11458.5	10464.9
X138.6.91	M139T91	5.69474	1.18182	0.242863	138.594	138.593	138.595	90.9668	87.1024	94.5572	45	11	34	4666.16	2160.18	3045.04	2559.82	7861.45	4468.56	587.514	2717.14	6388.11	2722.52	4967.46	2616.33	3723.07	6088.28	3537.81	4952.19	2202.97	6394.72	1060.14	5611.04	1262.08	4008.11	3680.51	2127.53	1593.72	2636.54	5291.59	4363.42	7901.83	3390.21	2676.61	2370.61	2829.22	1316.89	1078.1	769.107
X138.9.19	M139T19	1.21054	-1.47137	0.144626	138.906	138.905	138.912	18.9915	10.3854	20.8845	64	25	39	2567.68	7882.27	7540.81	18871.6	14042.2	12469.7	4742.93	6060.27	3667.36	4571.5	5181.71	9130.22	12429.4	7887.88	7458.59	6946.26	9201.55	7515.71	5561.49	6887.16	8385.04	203.9	6886.86	7263.57	8625.69	7905.41	17279.9	6693.66	3909.19	5002.58	3743.84	1112.97	6607.65	5044.9	3270.34	491.626
X139.32	M139T32	1.3538	1.97009	0.0515985	139.003	139.001	139.009	31.7573	27.2781	36.272	101	50	51	2.41307e+06	1.5506e+06	1.0785e+06	2.27007e+06	1.96747e+06	1.61079e+06	1.70724e+06	2.81788e+06	1.41449e+06	3.27099e+06	1.83634e+06	1.1622e+06	1.88077e+06	2.35907e+06	2.75546e+06	1.11477e+06	1.0506e+06	1.98626e+06	1.29591e+06	1.7016e+06	1.546e+06	2.16896e+06	2.10987e+06	3.27066e+06	1.16766e+06	1.17863e+06	1.15532e+06	1.61753e+06	2.88483e+06	1.51663e+06	1.11862e+06	1.5514e+06	11293.5	6300.06	8813.89	20411.7
X139.43	M139T43	1.15643	-0.339108	0.735275	139.05	139.048	139.054	43.1636	35.4119	44.9593	124	46	46	33339.5	829156	14030.1	48555.5	35704.3	41834	38063.4	22766	36472.3	34323.1	59400.2	36989.1	42143.8	27599.1	23830.4	54067.1	26583.3	17644.1	77644.2	52687	8982.19	1.3383e+06	23215.3	1.19707e+06	23590	24309.8	30474.1	20672	22431.3	1.00513e+06	648811	10466	44664.5	50031.1	49587.1	47645.4
X139.1.214	M139T214	1.06692	0.37538	0.708176	139.075	139.075	139.079	214.451	212.837	216.939	76	36	39	4370	4524.11	2097.2	55643.7	138857	76493.4	23776.2	31234.2	23748.7	46121.5	71465.5	24542	96147.6	60227.1	45426.6	14007.3	14781.8	17035.4	12832.4	21504.2	17454.2	59435.1	59222.1	16100.4	10712.3	17013.5	40187.2	9594.05	15301	13424.1	5585.7	17157.7	68994.7	8219.35	9877.23	8265.1
X140.33	M140T33	1.1823	1.40081	0.164386	140.006	140.005	140.012	32.5951	27.9974	39.1542	70	30	39	183278	78369.7	60710.7	68971.7	118583	100149	58984.7	107612	84141	187765	84581.9	83352.4	115122	153495	151583	102651	71545.3	84358.2	86388.4	108678	88803.3	142715	190404	190697	72932.8	77377.2	70287.2	96372.3	180793	91035.6	59287.6	75112.9	27091.8	17629.4	52879	13749.1
X140.24	M140T24	1.2606	1.54611	0.12575	140.032	140.031	140.032	23.9824	20.9904	26.5966	46	13	33	23399	9063.21	7560.61	14199.6	11084.5	9232.43	5601.98	24743.2	21512	19946.6	11600.3	17779.6	17263	3714.57	29369.8	2745.93	10081.4	4214.32	4957.9	12179.8	3797.81	12809.3	8268.13	13938.3	7119.82	7566.33	7749.09	5454.06	4908.78	3614.95	7406.39	8109.58	13527.5	7952.34	23809	2808.23
X140.1.20	M140T20	1.01367	-0.132977	0.894479	140.068	140.068	140.07	19.9169	10.6251	22.8088	61	25	35	313095	191928	161671	248625	256471	122861	14608.5	146948	129364	139662	136312	122050	133654	262933	202443	156357	153161	267690	90040.5	167413	268960	148272	83460.9	82309	89411.7	96736.5	157009	93023.8	139420	130834	53487.8	43927.9	76361.8	79954.8	333144	159267
X140.1.224	M140T224	1.01026	0.108856	0.913585	140.107	140.106	140.107	224.459	222.55	225.134	74	29	45	3617.95	3791.27	4680.85	24414.7	13075.6	8555.92	5156.3	4661.69	4858.74	5733.37	7668.35	5986.88	10773	25505.2	19167.2	22885.2	11818.3	22499.8	18680.6	17077.7	21359.9	27950.2	29333.1	13138.9	7408.95	11258.7	17781.6	8564.94	11333.3	13014.2	8501.92	6884.86	14466.2	13741.3	26382.4	24535.3
X140.1.134	M140T134	1.17581	1.54852	0.124726	140.143	140.143	140.144	134.5	132.75	139.069	68	25	43	4465.31	4495.62	6139.7	15185.2	10040.4	8034.17	6751.45	5040.8	5077.35	6292.15	7943.6	6551.48	12991.6	19353.7	13778.9	7923.53	8696.41	8210.13	11262.4	11785.2	16947.2	9163.46	10982.9	8723.74	6970.51	8791.16	10423	7082.11	8327.19	6266.03	15693.5	11040.8	19872.1	11172.1	7198.83	6396.4
X140.9.19	M141T19	1.04824	-0.396065	0.692912	140.903	140.903	140.906	18.8681	10.5864	20.6844	48	20	28	1340.3	3917.54	4586.06	11650.9	6782.67	6009.68	2798.57	4034.43	2102.48	2439.19	3631.59	6014.65	7671.96	5495.4	4402.81	4728.51	7647.33	5055.38	4173.24	4620.53	5327.93	387.81	4451.42	4742.76	4175.84	4705.27	5922.83	3525.6	3081.33	3023.27	2485.09	985.468	4151.67	3695.3	1995.02	615.384
X141.9	M141T9	1.18845	1.06543	0.28926	140.959	140.956	140.961	9.03044	-1.00655	20.8099	73	30	43	12876	28930.2	9874.8	85335.7	48541.2	52543.9	153151	190669	0	70004.9	40204.9	50882.4	197882	0	0	0	0	5645.71	6145.39	3772.99	3157.92	416507	289398	12618.1	0	0	0	75361.9	113313	106420	69178.5	0	177062	262519	251788	168135
X141.33	M141T33	1.00166	-0.0114664	0.990874	141.007	141.005	141.013	32.571	28.8534	36.0721	55	21	34	27148	10502.2	23919.1	20372	10894.2	27600.3	16727.6	17061.3	12959.9	18023.4	11048.8	10516.1	18446.9	20251.1	21330.2	11054.7	12154.2	15023.6	11467.7	12066.5	15343.7	19197.7	9521.74	21381.8	38766.7	37648.2	57257.6	32751.9	18787.9	12244.4	8178.2	11968.9	5791.81	7588.89	6574.96	9372.85
X141.58	M141T58	1.24916	1.44594	0.152807	141.016	141.015	141.017	57.9361	48.2421	61.5013	73	26	36	20967.7	9479.92	12683.8	19979.2	35689.7	15490.6	11244.9	15579.6	16782.7	13037.3	15456.9	17969.5	24509.2	15653.7	14423.8	16424.6	7024.41	13824.1	21175.2	21883.1	19914	3594.96	13154.1	14784.4	14721.1	11462.3	18420	12942.4	9020.21	6108.25	7047.09	8386.12	10029.2	7320.97	5174.04	2051.08
X141.1.23	M141T23	1.24532	-0.94515	0.346861	141.066	141.065	141.073	22.6817	12.5593	29.728	83	29	36	11590.1	5080.85	5986.62	8358.48	7978.77	5958.89	5645.22	7013.07	6580.66	6252.89	6352.67	3626.96	8282.55	5829.02	6098.01	3900.28	5509.13	14868.4	3230.61	3505.39	3616.5	15768.3	4286.85	3804.92	7230.49	5495.89	10664.9	8580.74	11715.8	4282.36	5052.94	3164.69	60733.6	32751.5	31949.9	13461.2
X141.1.146	M141T146	1.21303	2.13186	0.0355229	141.144	141.143	141.147	145.913	143.561	150.872	90	40	50	43236.2	56458.9	89496.8	111772	126813	68879	55964.5	55323.8	57022.1	52083	59010.2	52294.4	86151.6	211977	138922	134810	83183	139688	140896	139521	143726	133000	130693	46954.7	46603.3	66669.1	81231.4	64856.6	76735.7	104559	37257.3	38295.5	90718	84849	120010	118327
X142.1.128	M142T128	2.6927	-3.52785	0.000696755	142.065	142.064	142.069	128.125	124.327	130.675	81	34	47	131057	135463	243490	307849	287568	159241	147527	149887	139840	142120	181965	80248	261972	24677.6	243035	14326.1	7525.67	7716.08	9226.87	8089.61	6749.45	9152.96	9766.11	162089	177361	167408	226285	130207	10702.1	9587.34	137043	170695	19136.9	14877.9	18108.2	20067.7
X142.1.285	M142T285	1.10641	1.11145	0.269043	142.123	142.121	142.123	284.526	275.875	285.464	53	18	32	4084.62	3791.74	4763.63	8395.04	12388	7533.98	5146.84	4924.67	5731.02	6479.36	6067.7	6707.1	8531.51	15794.1	13175.1	20908.1	7194.08	9284.77	8607.5	9528.56	12638.4	13680.4	12103.3	7308.76	8394.3	7244.27	11084.6	4880.33	6639.19	6167.18	6076.6	5759.42	7101.36	4929.06	6704.23	16479.3
X142.2.143	M142T143	1.36093	1.75826	0.0819462	142.159	142.158	142.16	142.778	141.158	148.271	71	32	39	1658.87	2073.21	4142.54	24989.9	6777.85	3241.93	6207.91	1562.54	4290.92	3863.6	6794.26	2781.23	7836.77	40302.2	18104	21616.7	14772.8	16679.7	23979.7	24221.5	29907.2	23244	25876.2	14182.9	9503.45	15202.3	16676	8695.44	13877.3	12050.3	21251.7	25817.4	55677.9	33956.1	13127	13620.1
X143.51	M143T51	1.04644	0.528674	0.598255	143.01	143.01	143.011	50.8975	48.0966	53.5285	31	0	30	9338.27	8271.26	12286.4	17396.5	18085.4	18575	7011.15	7171.8	7139.19	10851.9	11403.9	11945.8	19394.6	28951.9	26746.5	11611.6	14517.5	13324.8	11394.6	12236.5	13951.7	12873.4	11257.8	13207.9	11113.5	13239.8	11755.8	10223	10829.2	10666.1	7175	9154.49	8007.73	7538.37	10699.4	7541.78
X143.91	M143T91	1.46816	2.51863	0.0135477	143.034	143.031	143.038	90.78	89.9192	94.3479	70	31	39	49152.9	35228	43534.1	58524	82776.7	74142.3	26509.2	67635.4	33319	48376.6	37501.7	66435.4	88263.4	93011.6	102737	38731.2	29181.7	57095.4	46981.9	63260.4	72058.2	60147.1	49794.2	59071.3	38834.5	65148.6	27930.6	53650.1	80703.1	44736.1	30521.7	51787.9	4609.1	4512.68	8121.69	5270.17
X143.1.128	M143T128	2.49062	-3.27501	0.00152003	143.073	143.072	143.077	128.24	124.53	130.875	89	40	49	208177	206996	448742	498489	441202	245216	237805	252708	246440	160889	268838	128764	359278	46291.4	374299	23688.6	11753.7	13909.1	17019.4	15951.4	14109.8	24357.1	21449.4	293469	285625	282241	367059	225698	15146.1	16458.4	183019	298418	34546.7	26589.1	29752.8	30615.2
X143.1.211	M143T211	1.22909	1.10219	0.273245	143.107	143.106	143.107	210.659	206.518	213.614	50	17	33	7558.84	7275.17	16140.5	47226.3	117020	52861.6	13349.7	20913.5	21298.6	25308.4	18431.7	20379.9	52293.9	42756.3	32634.5	16061.3	17999.4	20174.6	16062.8	21347.2	20613.3	24467.6	22629.6	22964.3	19427.3	13585.4	24064.4	9882.85	15343.7	14702.8	6049.47	9507.81	16585.4	5863.13	7269.17	6623.27
X143.1.133	M143T133	1.96705	-1.91134	0.0588691	143.106	143.106	143.11	133.375	132.473	138.047	58	23	35	217733	140787	215092	293181	295263	152546	143903	211736	40047	123595	175205	70508.3	255584	8788.18	19051.8	8941.58	6993.41	14535.6	10815.8	12258.1	12738.2	10689.2	11516.9	294279	68362.3	76654.6	56071.3	22558.9	12680.8	6931.28	74491.1	107381	25030.9	4064.87	5325.95	6800.47
X143.1.78	M143T78	1.01191	-0.106535	0.915377	143.118	143.117	143.122	78.1548	77.2329	84.5992	78	32	46	6280.37	8828.8	10126.1	50817.5	24725	12767.3	21019.2	10199.4	12863.3	12382.5	1962.72	13106.4	28747.8	150631	86321.7	92108.9	68945.1	79268.3	94099.2	87394.2	96155.7	93229.1	107366	41111.3	51423	43156.4	44823.8	25583.7	48524.1	31985	31060.6	30098.6	92658.3	103389	67489.2	67490.5
X144.1.140	M144T140	1.43027	3.05839	0.00304034	144.065	144.064	144.072	140.199	137.946	141.09	101	50	51	16147	19687.6	13273.9	25436.6	29312.3	11055.3	18082.7	10195.2	17378.3	17143	9240.36	5102.22	20411.3	35276.8	24832.1	17706.7	19321.4	13861.8	48056.6	47354.2	37137.8	9958.82	8566.18	12506.6	9336.06	6272.99	21351.6	21580.2	24272.1	17493.1	16152.5	20695	15797.7	21803.3	12489.8	8577.72
X144.1.165	M144T165	1.45269	-1.92937	0.0570327	144.081	144.079	144.087	165.454	161.81	168.292	97	48	49	103320	153008	272823	483563	237092	165689	167874	105709	119154	92822.7	80528.4	96797.2	231931	55920	175434	31624.6	35143.2	19638.9	53308.8	54126.1	93159.3	309968	52873.9	300837	245308	233721	509487	260831	84443.7	28267.7	90414.2	268325	55911.9	15634.3	34401.3	36561
X144.1.128	M144T128	1.97165	-3.31172	0.00134265	144.081	144.08	144.087	128.396	124.327	130.875	95	45	50	457868	482621	735688	785429	735499	446850	470516	476098	509064	322817	506174	280603	626631	160455	609065	79793.2	43887.1	43543	53370.1	53392.2	42114	53890.7	55129.6	503791	511906	493471	611138	416662	55406.4	55682.2	333080	512164	112290	90835.1	109455	123416
X144.1.130	M144T130	2.28628	-3.00432	0.00347543	144.101	144.101	144.102	129.693	128.077	137.2	50	22	28	492620	480099	732985	779739	731407	464068	470978	475559	504568	322973	508502	281266	637418	165891	613558	23020.8	19120.4	13148.4	11733.1	21600.5	19911.9	20885.2	20167.7	511769	510614	499867	612572	417073	59452.4	13345.6	334828	513716	114054	20154.5	32188.5	25650.5
X144.1.22	M144T22	1.07767	0.381698	0.703508	144.102	144.099	144.108	22.4646	14.9884	29.7079	101	49	51	63473.8	112934	45439.2	1.05634e+06	1.12586e+06	156461	249676	160005	437321	309230	75157.7	237560	132968	329502	500578	109458	349414	304390	249669	114860	1.02565e+06	196563	110912	211640	188704	157436	422295	89693.6	1.17154e+06	223432	86545.8	245822	115843	325086	1.55257e+06	39768.6
X144.1.78	M144T78	1.60329	-3.28561	0.00150844	144.121	144.12	144.122	78.1479	77.2381	80.309	52	24	28	11595.8	16685.5	21125.8	35614.3	42315.5	17216.4	21013.4	14352.2	18994.9	14587.8	20353.2	18811.7	22576.8	11704.3	33746	6799.18	5591.75	7165.18	6942.19	7224.04	8338.99	7827.91	8514.55	21947.7	45938.9	23134.4	32112	21543.2	3891.42	7494.56	12495.6	30274.3	6611	8306.19	5710.84	5338.63
X144.6.49	M145T49	1.04454	0.218032	0.827854	144.605	144.604	144.605	49.4164	42.1928	55.0904	46	11	32	12117.4	9155.12	14540.2	21315.1	24404.8	8787.46	5654.14	14252.7	13401.5	19031	10350.9	11704.1	29617.3	84221.5	35510	37513.3	13031.2	50771.9	24428.3	43306.7	43797	70899.5	56149.8	24740.8	15338.4	29248.2	48407.2	25264.5	74472.1	27328.8	21649	45549.2	1906.01	1585.8	2511.99	1300.9
X145.9	M145T9	1.0722	-0.424744	0.671942	145.007	145.007	145.009	8.90108	-1.00655	20.8099	64	25	39	43885.2	67193	73511	100376	196446	95278.7	62533.1	81422.9	0	46031.6	76124.6	38067.7	134654	16920.9	0	0	0	32675	49220.9	23398	7289.08	177174	238288	78134.5	0	0	0	93224.5	40310.6	47071.9	79258.9	0	171216	213129	243946	162505
X145.82	M145T82	1.23112	-0.905073	0.368289	145.032	145.031	145.034	81.9077	80.5828	86.2336	58	21	37	9851.45	11972	9847.23	46664.1	13986	35862.5	26130.7	10969.3	5414.65	4704.05	8313.33	24118.1	12560.3	5100.6	60719.1	24813.6	3272.73	7397.61	27886	17089.2	2603.3	14707.9	26928.5	30687.3	13527.2	4241.64	9798.49	20212.5	14179.9	157079	5596.93	7837.91	2978.51	16928.8	6423	7168.19
X145.22	M145T22_1	1.14315	-1.11203	0.269205	145.049	145.047	145.053	21.5169	12.9874	27.0154	79	31	42	16670.3	13706.3	13295.5	86940.9	86573.8	22894.4	52979.5	26060.1	29218.8	76700	32168.7	42988.1	37378.4	51862.7	105218	32106.4	38647.6	10619	15607	38002.8	39008.8	40266.8	38231.5	31666	50114.5	24914.8	49115.7	17650	42619.3	27083.6	13881.4	41887.5	29742.8	33343.3	35639.9	157486
X145.1.128	M145T128	1.83341	-3.05299	0.00307763	145.084	145.081	145.088	128.24	124.327	130.875	87	41	46	64170.7	58417.2	90177.7	116985	145131	70469.8	52219.5	58463	49806.2	46422.2	55094.7	30083.5	81163.3	23108.5	75412.6	11352.6	6105.89	7350.07	9649.1	13225.5	18146.1	24837.9	23859.5	53092.3	25071.1	53822.3	68723.7	47270.4	7562.23	6619.88	34022.4	51014.6	11922.5	12036.2	14265.2	14137.5
X145.1.165	M145T165	1.30822	-1.73218	0.0869867	145.084	145.081	145.088	165.257	161.708	168.018	74	35	39	34661.8	29367.1	33100.1	69252.6	3344.28	29473.5	2210.99	19331.1	15541.1	1961.01	20712.5	19210.5	29203	21670.4	21043.9	15216.2	11914	10003.6	11404.4	12097.7	18924.2	58551.9	25874.2	38650.3	30058.9	37727.3	69687.5	33119.7	13044.6	5842.14	14612.2	21663.4	13498	6928.72	9464.84	5240.17
X145.1.22	M145T22_2	1.08015	0.334232	0.738923	145.105	145.103	145.109	22.4565	14.9884	25.2633	87	40	47	5285.49	12652.2	12187.7	80791.1	82540.6	15038	16431.3	11215.9	29654.6	20465.5	5798.12	16739.9	9714.64	25519.6	27118.9	9099	23738.7	19280.4	14718.5	8783.13	95943.7	6555.32	9758.91	14180.3	13365.8	11752.8	29000.3	8629.19	132781	16278.5	7077.57	16253.7	8504.47	18969.2	113561	1315.78
X145.1.407	M145T407	1.21798	-1.78186	0.0780934	145.122	145.121	145.123	407.454	404.862	408.619	64	26	38	11667.9	7370.54	9934.88	14859.6	29636.3	14404.7	7770.17	12876.5	10099.4	10506.4	13373.5	6949.43	20873.9	19334.5	13620.5	6993.7	5496.57	11578.5	7433	8851.73	10190.3	8434.59	5057.9	8940.79	14566.4	18376.8	12199.7	8965.59	6262.71	12858.2	6458.37	9033	5112.23	7984.5	5438.75	5471.67
X146.23	M146T23	1.07443	-0.565527	0.573034	146.027	146.026	146.031	22.5657	14.7959	31.2318	48	16	29	6626.47	4334.55	4328.69	9703.57	13561.8	7495.95	16962.7	7566	12462.1	7825.17	9300.35	12984.1	7535.14	5736.61	13643	6250.17	2379.31	1959.42	16952.6	5587.01	2775.1	3014.7	4995.62	6014.71	10296.6	3673.7	5727.26	6013.25	11529.8	5154.26	5631.99	7160.86	3941.17	4623.57	5066.32	8544.77
X146.1.258	M146T258	1.04467	-0.544423	0.587405	146.06	146.059	146.063	257.993	255.269	260.164	77	32	45	20648.8	15170.4	31349	58756.4	55751.5	25340.7	18068.2	25282.1	17609.7	20775.5	19942.5	12098.4	34251.5	73638.1	26554	91108.2	36095.7	47070.9	52446	45344.5	46474.4	42019.7	34738.7	32329.5	19873.3	41489	38608.2	28671.1	35951.2	52694.4	52797	19266.3	25841.9	28158.2	43063.7	35005.6
X146.1.92	M146T92	1.99257	-2.78589	0.00651817	146.06	146.059	146.064	91.5936	88.25	94.7527	68	31	37	34632.4	26539.9	56385.1	109967	113887	47433.6	50851.8	30658.8	36632.1	54709	48641.7	24443.7	54652.5	10259.1	52240.7	5381.68	4017.99	4572.63	11187.8	11175.8	3889.26	8506.82	9142.63	45281.4	42420.1	47890.1	66082.9	53039.1	4934.76	4980.48	30630.6	32099.4	5659.78	5986.43	7770.04	6039.87
X146.1.128	M146T128	1.74486	-3.11984	0.00239532	146.06	146.059	146.067	128.405	124.327	130.875	96	46	50	438984	410729	602350	1.12374e+06	591244	714234	763282	778058	788917	576839	795237	586970	988193	291892	870001	158061	80965.4	85830.6	104010	99819.4	80990.1	98605.9	102605	790792	799385	794231	886885	694092	92323.5	97692.6	630466	788609	215190	193727	219436	239964
X146.1.140	M146T140	1.20873	-1.36775	0.17492	146.063	146.06	146.065	139.959	135.63	140.848	62	22	39	24414.3	18400.6	36404.4	43464.5	52133.7	25231.8	13397.2	10324.3	12159.8	12057.7	14209.8	4984.01	21340.1	12821.2	16795	5231.65	8193.76	6209.11	16429.1	17180.8	14349.4	4007.8	4432.32	12397.6	15099.3	13569.4	17578.5	11645.5	8811.56	7306.05	9792.31	14896.4	6232.12	7990.15	4399.22	6776.64
X146.1.78	M146T78	1.0803	-1.23425	0.220008	146.081	146.081	146.082	78.3766	77.2778	79.9095	45	17	28	10050.1	10989.7	12573.7	21378.7	21504.4	16548.6	11349.2	9195.68	12469.5	13458.5	12558.5	13873.8	20769.3	18859.6	37668.8	17881.8	10711.8	13863.7	14701.4	18447.6	21269	15123.2	20942.7	15471.8	14471.7	19747.1	20102.8	14428.1	15182	9457.55	9912.47	11270.4	19467.3	19158.8	25655.1	22844.2
X146.1.36	M146T36	1.05444	0.463719	0.643859	146.092	146.091	146.093	36.4667	24.8624	38.0437	50	17	32	8415.8	7140.26	6638.9	12215.2	13131.4	9719.23	18864.2	6059.42	8767.87	8371.56	12006.1	8292.71	13459.9	27019.6	12835.6	9748.84	11958.1	19796.5	27323.8	39137	7925.55	17265.6	6873.96	10649.5	8270.36	12483.6	13843.7	8783.4	10172.2	9012.18	6942.04	8470.63	19318.3	20856.6	18330	14943.8
X146.1.118	M146T118	1.04673	0.482033	0.630913	146.117	146.117	146.118	117.782	113.298	119.964	68	27	41	14771.7	16041.3	23062.1	24631.5	34097.4	19751.6	14769.6	11768.9	20709.8	13371	17506.5	10930.6	24276.5	25886	43853.4	15313.3	12061.8	28126.5	17913.1	29897.1	17917.2	32721.2	17130.5	24378.6	16970.8	26172.6	16478.2	14128.6	18299.8	14982.9	11755.3	12635.2	13176.4	18698.3	39804.4	19492.6
X146.1.22	M146T22	1.37973	2.72841	0.00758873	146.117	146.117	146.118	21.6377	13.5874	23.4533	65	23	42	30575.5	121204	80825.3	141289	175347	77000.7	113699	101897	93326.1	129365	90847.8	50817.6	155313	266223	100155	104319	246674	172200	147996	149702	82767.3	6478.3	237610	85878.9	69062.3	90184.6	77603.3	119768	117622	99513.1	87448.2	64982.3	140914	198061	184165	2135.07
X146.1.109	M146T109	1.83029	1.27861	0.206884	146.117	146.117	146.118	109.307	105.043	111.216	43	15	28	8864.83	8232.5	8798.83	15819.7	19523	12725.7	8884.88	8774.93	9496.98	10713.9	11185.8	10643.7	26643.3	17989.2	15215	7060.87	8252.63	14317	11855.1	22623.6	16873.7	18472	12499.2	11100.4	9765.15	13338	10647	10557.2	9984.63	10879.2	6259.8	7073.68	10594.3	10321.7	13362.7	10991.8
X146.1.224	M146T224	1.18372	-1.23081	0.221422	146.117	146.115	146.121	223.736	219.891	230.192	81	37	44	17985.1	28893.2	42376.8	32393.9	41221.4	15474.7	11978.7	23814.2	18604.2	10916.8	9141.65	20219	40849.1	29738.5	37740.4	9524.3	7446.2	8387.51	4074.35	8982.7	11580.6	9470.31	7259.86	22190.7	28634.9	21783.8	23884.4	26821.9	13172.3	7513.65	20229	12722.9	6316.58	7494.53	10034.8	6909.46
X146.2.17	M146T17	1.43876	1.65374	0.101909	146.166	146.164	146.166	16.7523	7.98541	25.6328	55	20	35	56351.8	176994	297440	68879.8	371664	141103	204615	195003	21408.8	60038.2	213476	172210	488469	146129	2617.93	145238	126041	425705	566188	450248	134859	799.864	600104	279552	246499	109956	205166	257105	560651	613811	131495	1210.99	384861	361232	29251.1	0
X147.32	M147T32	1.3071	1.61474	0.109534	147.029	147.027	147.033	31.8311	27.2596	36.172	98	48	50	1.36227e+06	971693	376960	1.53323e+06	1.29144e+06	1.24328e+06	1.44028e+06	1.353e+06	1.13883e+06	1.20217e+06	1.29331e+06	1.10498e+06	1.48051e+06	2.40288e+06	1.90451e+06	2.02236e+06	1.45275e+06	2.52132e+06	1.94672e+06	2.17735e+06	3.01189e+06	4.19652e+06	3.00801e+06	1.39871e+06	907477	982098	982327	1.44353e+06	3.31472e+06	1.42299e+06	770631	1.03043e+06	10085.2	6291.64	8296.98	5659.64
X147.60	M147T60	1.01645	0.155175	0.876996	147.044	147.041	147.048	60.0339	52.1445	63.331	136	49	50	3002.14	28437.3	179597	122277	111307	54549.7	105455	123952	80975.7	82772.6	103158	44894.2	135487	96192	248400	50202	61935.4	41360.7	63501.5	50507.2	55605.6	98976.6	45748.2	117585	57873.7	53730.2	180833	56105.4	73611.4	70206.8	81485.8	108469	65900.4	76942.8	51332.6	83792
X147.77	M147T77	1.17199	0.861715	0.391112	147.047	147.045	147.053	77.0372	75.8536	83.3854	77	36	41	11849.1	1076.94	9690.08	16010.1	1022.84	15012.9	9299.71	12415.6	10160.9	18114.5	38463.3	9689.14	28936.5	16398.7	11213.1	9956.27	6429.77	16081	19186.7	8085.62	8098.89	15846.6	7784.65	12745.9	17800.9	12245.2	7409.54	11215	17190.3	9874.1	869.928	48520.8	17111.5	6161.76	11308.6	27627
X147.1.128	M147T128	2.34415	-3.13938	0.00231755	147.063	147.062	147.067	128.139	120.718	130.675	83	36	46	130371	138192	240887	291187	266522	154285	148939	139001	137396	101509	147059	83505.1	222142	26150.1	209858	15510.4	10417.2	8760	10289.2	9750.74	9510.17	12055.9	17511	145784	70952.8	144713	199945	123366	9511.61	8782.9	85334.9	143691	17778.4	15558.4	18497	20401.3
X147.1.258	M147T258	1.19016	-1.74764	0.0837321	147.063	147.063	147.067	257.948	254.87	268.155	53	22	30	4632.75	4210.73	9360.68	19688	15684.9	12314.3	7054.47	9377.31	5321.73	7651.32	11199.9	5802.68	15300.3	8475.57	7476.1	10550.4	4743.65	5438.5	6114.99	4559.64	5354.09	6330.43	7616.55	7133.69	5970.62	9217.56	10403.8	6915.27	4023.33	5871.66	8201.39	5044.09	5005.89	5094.46	5626.67	3554.07
X147.1.391	M147T391	1.83802	-2.51909	0.0135025	147.065	147.064	147.072	391.474	389.668	393.472	93	44	49	57737.5	47351.8	39601.3	118833	82085.5	96536.2	55433.7	39639	58151.5	14557.5	60937.5	34573.1	48036.4	13531.1	60092.6	7279.45	6598.26	6547.27	5900.93	7800.18	7364.61	7602.32	5934.79	44289.6	55223.4	55169.6	44397.8	34632.5	10233.2	5780.63	25651.7	24771.1	8214	6599.56	4857.18	4601.4
X147.1.21	M147T21	1.44026	3.03129	0.00311842	147.076	147.076	147.08	21.1759	12.5874	26.5967	66	26	40	34984.8	37099.5	58188.5	72000.1	51391.5	66260.4	52480.7	70138.2	33666.1	56894	46920.6	38373.8	125906	165726	204105	39654.3	69257.3	122983	75077	113469	164171	14249.4	139613	55501.5	59238.2	62522.7	65434.1	73732.9	76740.1	71984.7	48839.6	41076.9	40458.2	46004	73785.9	1707.32
X147.1.17	M147T17_1	1.40582	-1.97905	0.0512697	147.113	147.112	147.113	16.5852	8.18545	21.0388	40	13	27	20871.5	26184.1	35738.6	41240.1	37269.9	48192	47710.2	60471.1	28463.7	41435.7	42611.2	12168.8	76929.7	12949.5	142981	10876.8	35132.3	13062.1	28126.4	17395.6	93062.1	1148	29736.2	55662.6	14438.4	34080.7	7684.89	10768.1	23283.6	25313.1	44497.7	107136	33842.1	19133.4	68829	783.416
X147.1.80	M147T80	1.53189	-2.60507	0.0108868	147.113	147.11	147.117	80.0497	78.8039	85.8288	96	48	48	41271	70965.9	94590.2	95694.2	88772.6	68073.9	56142.7	36538.1	48441.4	54692.4	88315.4	47131.9	78265.7	22673.3	131247	14455.5	11052.8	13075.3	22022.9	15081.8	14906.4	20459.4	15037.6	54592.8	32888.9	61635.3	52759.9	54722	17565.9	15689.7	35140.1	26567.1	13577.1	22466.9	23492.2	11235.7
X147.2.17	M147T17_2	1.25646	1.25507	0.212433	147.168	147.168	147.169	16.5991	7.98541	19.8388	47	17	30	6260.04	12669.7	20678.7	6081.32	31479.4	11001.9	17287.2	13635.6	3078.34	5167.26	15677.5	15998.7	38444.9	12842.9	1015.48	22264.4	20494.8	30325.3	42607.4	37818.5	10687.1	1411.76	29378.9	23148.5	23246.8	10006.1	18324.8	19735.9	75824.3	32092.6	10098.2	617.666	25998.4	18199.3	3190.7	0
X148.20	M148T20	1.26197	2.09255	0.0393294	148.004	148.003	148.004	20.1239	11.5864	21.4397	51	17	34	5594.15	5265.22	5679.62	10105.6	9419.99	8908.95	9547.22	7091.4	5237.67	10103.9	6958.17	6196.42	14747.3	8995.97	19311.8	6319.31	9773.65	11604.8	5524.02	5811.26	8397.49	10559.4	6803.63	11043.6	8272.08	7823.81	10697.3	16169.9	5405.61	4788.19	10962.2	8842.75	5292.05	11121.8	8730.32	1735.01
X148.32	M148T32	1.09956	-0.389918	0.697658	148.032	148.03	148.038	32.4163	28.8534	35.7721	54	24	30	160727	38708.3	42098.6	57877.6	57065.1	52366.3	29140.1	48186.8	46603.6	97085.4	25812.8	46917.5	215526	668091	99007.3	23100.6	61358.7	494594	539816	667744	89401.5	105130	75523.2	41660.8	19947.2	45417.1	174632	28978.8	124415	67585.4	35053.7	42846.1	28827.6	19462	59422	14699.2
X148.86	M148T86	1.16858	-1.66793	0.0984605	148.039	148.037	148.042	86.0925	84.9643	87.4447	52	19	33	8686.04	8580.84	9568.72	17865.4	5837.5	10005.9	9665.69	10116.3	9300.08	10351.5	5833.55	9327.64	13611.3	9616.75	12622.8	5607.04	4895.34	5172.44	4677.3	5567.26	4011.48	6295.15	5491.26	10816.2	8314.21	7079.75	8437.25	4267.22	5128.36	7009.91	8517.36	8262.23	7067.26	3965.28	7810.18	3282.08
X148.1.21	M148T21	1.42999	2.51969	0.0134138	148.06	148.054	148.063	21.197	12.5874	27.8338	70	28	42	21550.6	22147.8	7259.09	47621.7	70671	62128.2	100537	70181.1	71464.5	68435.7	74435.4	42048.1	104676	284178	34414.3	78414.6	95545.9	71237.4	133153	96612.4	52294.8	72845.7	99975.7	62826.6	67353.7	36771.4	64560.5	59340.1	70704.8	50685.7	3938.41	58391.8	107991	159113	231461	1315.5
X148.1.95	M148T95	1.00993	0.170373	0.865064	148.075	148.074	148.078	94.6493	92.6298	97.3842	76	32	44	8066.36	7889.67	6814.72	15903.4	15986.2	9403.03	7245.24	4129.26	8777.12	6947.75	7353.97	6495.28	9630.64	9408.42	11479.1	7995.07	6637.93	7596.4	6231.59	6313.06	5932.87	7197.69	5070.84	7321.31	6929.34	9318.42	9853.51	7984.8	6387.44	7500.61	5733.32	6452.18	7505.41	8611.44	8220.49	8587.06
X148.1.52	M148T52	1.09659	0.911268	0.364346	148.097	148.096	148.097	52.4235	45.4387	54.0277	70	28	42	52882.5	41691.2	105657	76386.5	65892.4	46995.3	81636	41312.8	65234.6	45903.5	43093	48029.4	94237.2	248668	74313	55218.6	36205.8	106088	82141	75636.3	108692	172839	66200.8	82206.1	79590.6	71732.3	56743.5	50393.9	94318.7	38257.4	53377	51270.8	35402.8	52733.3	115680	91706.6
X148.1.25	M148T25	1.2049	2.21247	0.0292114	148.097	148.096	148.097	25.494	23.3444	29.1976	64	24	40	19131.4	22857.4	22761	40231.9	53977.1	32051.9	23148.3	31370.4	31045.2	28360.5	30459.1	38025.3	79311.8	87713.3	55425.1	51105.9	93710.4	52623.1	52222.8	55966.1	69624.1	117817	53887.6	43032.7	73425.3	28038.2	72157.5	68030.2	43612.8	43609.9	22419.5	21032.4	44918.2	38447.7	42088.2	18683.2
X148.1.34	M148T34	1.02499	0.306331	0.760002	148.097	148.096	148.097	33.9095	32.5726	35.9269	52	28	24	15457	22220.6	27085.6	45399.8	53223.3	28590.4	39313.1	24628.5	27467.2	22936.2	26561.5	20813.5	65051	89418.4	40242.9	38632.8	57300.6	43892.2	41037.4	46468.8	50187.4	43561	38991.8	36107.1	27039.2	30207.5	32542.4	30101.6	28903.6	35953.2	20287.8	16866.5	63796.6	57285.6	64406	43138.6
X149.10	M149T10	1.77229	-2.18731	0.0319304	149.002	149.001	149.003	9.53869	-0.00755091	20.8099	59	23	36	219790	399660	387898	46392.7	340092	115487	404537	114777	0	21504.3	341971	108580	700167	0	0	0	0	30355.9	44769.3	16871	14153	99778.8	101246	335519	0	0	0	278808	34164.1	27298.7	218694	0	65417.7	78826.1	42389.7	52484.6
X149.477	M149T477	2.30605	-2.14433	0.035201	149.023	149.02	149.028	477.151	474.783	479.495	89	43	46	405446	453856	312679	362748	632036	259894	109827	407009	274978	342219	305567	286991	73157.6	27609.2	37837.8	11675.5	10864.1	10133.9	7186.33	8455.14	9179.4	23603.4	21734.7	26601.1	27461	15106.4	25648.7	19900.3	9406.78	9895.46	19366.4	15976.2	9749.67	8238.35	5520.89	3873.51
X149.1.95	M149T95	1.07182	1.03315	0.304193	149.06	149.057	149.063	94.8229	92.6298	97.3842	101	50	51	58121.6	99267.3	93693.8	152178	131610	72529.8	50037.3	54899.1	63511	53233.2	53582.7	40887.2	71901.1	105963	80818.6	79144.3	81826.5	84739.6	78448.2	70969.9	69837.1	86260.7	59071.9	52370.1	48187.4	60499.2	65628	50248.2	73117.2	86118.6	38874.4	47408.9	87175.1	108364	106338	108551
X149.1.309	M149T309	1.03028	-0.153152	0.878593	149.06	149.059	149.063	309.487	299.64	310.648	69	33	35	31831.2	46696.9	29555.2	43686.5	12625.1	32404.3	8745.87	32546.4	9937.75	663.736	18166	10703.4	12805.6	5393.48	11031.3	2716.17	2839.53	3891.9	11644.2	12202.4	12715.2	7684.92	6641.24	6319.6	7017.38	8841.21	8691.43	6705.03	9002.48	6807.98	4059.99	6017.13	5118.42	9203.72	2818.92	3920.4
X149.1.21	M149T21	1.23094	2.64464	0.00958514	149.063	149.063	149.064	21.1838	12.5874	22.7537	38	11	27	2457.34	3959.21	2572.21	4784.09	5279.36	5334.53	7061.94	5270.91	4978.22	5239.64	5596.62	3846.93	7792.67	9923.93	8180.11	5882.71	7764.21	4602.68	9818.27	8673.91	6702.19	6492.67	9052.46	4922	5315.73	3536.78	5049.22	5164.22	4529.4	5253.31	4009.35	5190.47	8245.33	7298.19	11439.5	2562.71
X149.1.408	M149T408	1.2538	-1.52859	0.129927	149.096	149.094	149.103	407.928	406.262	409.62	83	43	40	39464.4	29026.6	13677.4	22961.1	62413.1	62746.5	10642.4	66291	31408.6	28352	23959.6	15783.4	37788.7	26863.2	30209	9083.09	5773.7	10277.2	10154.3	9179.57	12088.8	16322	14508.5	12844.2	9276.58	1786.61	25093.9	11995.4	16291.2	16901.2	12236.1	20020.3	14086	14578	4043.4	7341.82
X149.1.170	M149T170	1.03085	0.191712	0.84838	149.117	149.116	149.118	169.751	167.843	170.666	66	26	40	15494.9	62546.7	8447	14608.6	18508.1	12345	6013.46	14958.6	9592.36	24999.6	13092.6	8949.52	15297	7571.84	6827.55	32838.2	10698.9	25147.3	6877.81	6525.94	6550.13	41211.5	20418.6	17774.3	9941.05	12308.4	10896.6	8208.28	9237.7	10648.6	9007.42	5135.08	6920.97	5277.83	7073.17	7516.84
X150.1.38	M150T38	1.28903	2.27005	0.025356	150.059	150.057	150.063	37.7218	30.6534	39.0877	102	44	51	651549	1.1425e+06	36473.6	2.05135e+06	36270	25499.8	752767	29132.3	310838	22926.6	533516	485302	530704	2.21412e+06	1.54958e+06	1.77097e+06	2.32479e+06	1.66835e+06	1.657e+06	1.60867e+06	2.22841e+06	2.71821e+06	1.77348e+06	1.03147e+06	24860.9	26233	994668	670501	1.78325e+06	1.72954e+06	761197	33011.4	1.21023e+06	1.41102e+06	1.65864e+06	2.64626e+06
X150.1.140	M150T140	1.31041	2.37791	0.0196828	150.058	150.054	150.062	140.292	138.036	151.772	95	42	49	990.209	15194.2	6800.43	14883.7	18935.2	12236.3	10575.7	5551.31	10170.6	9204.19	9521.26	5566.89	7488.01	18919.6	24488.3	9208.91	9605.9	6227.16	20841.2	20438	15733.9	4123.37	6430.96	11612.8	1050.95	10914.2	15306.5	9555.58	12349.2	7891.16	10204.3	13087.7	8080.58	7233.1	8065.74	6330.62
X150.1.95	M150T95	1.00551	-0.0798098	0.936549	150.063	150.062	150.068	94.7536	92.6639	103.084	88	39	48	8540.67	11673.7	8702.49	22746.8	21874.9	13371.4	4952.59	5271.96	6302.35	10823.3	6096	10465.7	7624.88	10875.1	14489.7	8831.61	8176.05	8563.48	7863.52	7693.89	8396.75	8653.76	7196.73	5766.79	5424.81	11633.8	6893.85	10176.4	8395.19	9194.89	8305.86	10450	8652.44	9783.69	9879.51	9120.64
X151.135	M151T135	1.26751	-2.92685	0.00432265	151.032	151.032	151.039	135.229	133.751	140.104	47	19	28	6207.56	7897.92	11301.7	12858.7	13039.5	11180.3	8469.86	5769.06	7008.08	9115.89	9311.48	5792.83	8324.73	4648.89	6773.69	2742.63	3300.76	2909.12	2879.51	2016.49	3652.45	3306.7	4760.04	6283.37	5596.35	9391.66	6305.16	5759.58	3094.21	2557.14	5553.16	8194.44	7270.58	8694.36	10632.9	8966.03
X151.20	M151T20	2.23212	-2.09587	0.0404785	151.047	151.044	151.048	20.0221	11.7874	21.5966	40	11	29	80012.4	42265.8	35325.1	62364.3	116959	57435.7	5159.88	5247.17	5309.64	5959.36	5577.67	7204.28	20653.3	6636.26	10647.9	6055.79	1826.82	3783.58	3984.89	7101.42	2908.17	2012.48	3006.83	5067.92	9178.57	5541.66	4949.84	15850.4	10030.4	5617.03	3492.25	1768.62	5362.46	3590.19	4380.13	2166.55
X151.1.38	M151T38	1.18736	1.95289	0.0538129	151.061	151.06	151.062	37.7597	30.6534	39.0877	83	31	46	45221.7	53547.2	59232.3	137230	69795.5	49814	43314	52860	46883.9	37030.3	31224.2	30264.8	76399.2	125995	95291.8	89065	131933	86191.9	88321.9	86805	125659	157072	100636	57363.5	46456.9	49414.3	57953.7	41336.1	96775.6	92878.5	44857.3	64735.1	61705.5	62786.1	79070	138113
X151.1.94	M151T94	1.31779	-2.88216	0.00506802	151.061	151.059	151.068	93.956	86.6678	96.7773	101	50	50	13943.4	14152.2	14575.8	39642.4	64841.7	19575.1	20151.6	9185.73	31180.6	21558	29003.4	13881.3	30023.5	20047.5	24698.4	10773.1	8158.2	7662.44	10590.6	9708.88	6858.3	10060.5	7306.25	20922.8	15873.9	22756.7	24298.1	27910.5	8565.05	10125.7	8725.55	12669.6	15934.9	19926.2	22452.3	17572.1
X151.1.86	M151T86	1.15218	1.25859	0.211645	151.096	151.096	151.097	85.5523	77.0075	90.2889	76	30	45	9093.93	16306.7	14159.5	17408.3	25543.5	17332.9	33250.5	13783.2	9785.92	13923.5	19616	9344.81	33920	45792	24125.7	24628.6	21146.4	20977.6	29245.7	15234.2	13589.7	18757	18737.8	10683.7	12441.5	10353.2	14448	16687.4	16168.8	15676.2	15208.4	8570.63	21961	19842.4	17256.3	26671.9
X151.1.120	M151T120	1.02257	-0.286095	0.775405	151.123	151.122	151.123	120.007	118.56	123.967	46	18	28	2812.34	3214.51	4830.98	8850.53	7276.6	5617.99	4595.46	5767.71	3676.2	5922.33	8891.95	4152.43	8359.03	9792.62	10975.6	5165.81	3583.97	9218.85	6289.8	7280.76	8287.62	8160.99	7769.71	7273.28	6950.42	7980.39	7779.49	5169.69	8003.83	4212	3638.62	3936.5	2800.49	6768.16	4696.28	3972.41
X151.1.362	M151T362	1.0192	0.104902	0.916663	151.148	151.147	151.151	361.79	360.892	363.238	47	17	30	4928.27	3774.2	7911.82	20675.8	28113.7	17480.5	5973.58	10844.8	7225.85	12169.4	20250.7	9250.01	35070	9284.66	8971.8	2274.28	6879.52	6727.66	4963.52	3584.06	5433.27	10691.2	10973.7	6919.46	10857.3	5762.37	8473.38	4761.88	5503.74	3493.38	4187.24	4849.29	4347.6	2924.61	2868.8	2695.21
X152.52	M152T52	1.02683	-0.106348	0.915521	152.032	152.031	152.034	52.4988	45.0341	53.7078	81	34	47	19114.2	17570.2	42933.5	38021.1	70786.4	40825.1	29710.2	25025.4	27786.6	21188.2	45653.9	16630.6	3173.03	35149	23721.5	38862.8	21643.8	18247.9	103955	53750.6	17688.8	18079.6	28725	13985.8	29908.5	15617.3	22473	29463.2	21069.9	14222.1	16569.4	14896	77343.6	119842	253768	153909
X152.33	M152T33	1.67761	-1.61831	0.109041	152.032	152.031	152.038	33.2157	23.0377	40.0725	52	24	27	16389.5	13302	19501.5	26652.7	39790.1	17530.9	21446	13105.8	23618.1	23480.5	26514.2	25140.8	28893.4	9569.94	37287.1	17983.3	5457.95	10731.1	48638.5	20628.9	6492.58	6152.87	8975.01	25830.5	25281.2	24049.6	37797.6	18441.5	3808.05	4820.34	15321.7	27939.3	208629	332803	656459	503485
X152.1.38	M152T38	1.11698	1.25471	0.212518	152.054	152.053	152.058	37.6484	30.6534	39.0877	97	40	48	37461.5	44501.3	29181.6	145990	123409	50962.1	50515.2	49696.6	51996.4	34678.9	1145.49	33001.6	72407.1	90410.6	42344	73799.3	94934.4	65925.3	74829.3	64033.7	93290.1	112136	71159.8	30909.2	40335.5	44833.4	49248.2	38462	67154.2	66885.1	36050.4	55053.3	40121.6	43751	59051.1	69709.9
X152.1.113	M152T113	2.29804	1.74812	0.0841066	152.071	152.069	152.072	112.771	103.667	117.556	43	16	26	7865.33	6598.64	10463.5	575803	17491.5	21990.2	586203	11154.9	6357.26	8113.68	17092.7	9145.35	12482.2	16434.5	305148	14943.1	16873.3	54409.6	11105.8	8302.64	12956.1	14819.3	1.72465e+06	22882.7	9298.16	19013.6	16385.6	9626.05	52930.2	9282.29	7360.82	7282.18	6316.42	7915.72	33732.6	8243.37
X153.86	M153T86	1.21665	-1.1438	0.255666	153.041	153.039	153.043	86.2869	85.8459	90.2889	60	27	33	10044.8	5146.4	7355.82	4962.74	21324.8	12056.3	9561.81	9579.76	4578.5	6103	10665.5	12938.6	10130.3	11611.7	18362.3	4890.04	4717.63	4909.63	3884.25	4686.56	5450.08	3825.68	2669.78	7160.57	7879.9	7083.9	14603.3	8268.42	5680.83	3109.19	7465.52	7185.92	13714.4	42015.4	16414.3	16283.1
X153.52	M153T52	1.5085	2.18094	0.0327212	153.041	153.04	153.047	51.6607	45.2374	54.4436	99	49	50	211644	119656	77414	263657	23007.4	138045	279905	47478.2	158216	5011.5	103291	220445	180407	231022	9988.8	205220	91620.4	84503.5	212844	151820	96999.2	86526.6	86698.4	66864.6	5784.36	102396	5808.62	135154	162314	86139.7	50004.6	110130	203123	339649	226791	191953
X153.1.78	M153T78	1.01872	-0.0893957	0.928956	153.066	153.065	153.074	77.8503	76.3089	86.2418	101	49	51	15931	51609.3	66126.5	197601	165336	56431.2	75910.3	23561.3	48064.4	53295.6	19517.8	47114.9	131306	302014	95884.2	96222.2	100723	22052.6	120030	48224.4	30465.3	354024	111334	63033.7	166302	10178.7	76291	34143.4	65403.1	215140	92713.7	17605.6	160009	55520.9	446739	54023.5
X153.1.22	M153T22	1.26671	2.45548	0.0159136	153.087	153.086	153.087	21.5503	12.9874	22.9966	55	19	36	4884.42	7263.08	5180.47	9908.33	7786.75	9799.25	17856	17888.6	10802	15252.1	9688.42	15653.7	23461	26201.4	22568.7	23359.3	46217.2	27177.6	18952	23763	45954.4	14255.7	38647	27266	17823.5	20387.8	19501.2	11090.7	26250.7	26304.5	13632.3	14987.1	25179.5	30551.5	24250.9	23957.1
X153.1.165	M153T165	1.03444	-0.358133	0.721003	153.127	153.126	153.13	164.698	163.246	169.979	50	18	32	8799.74	6283.55	14258.7	17672.9	20604.7	16693.4	9157.87	13265.6	8253.52	9028.34	14901.2	7298.5	21624.3	8549.64	11433.9	6917.62	8733.67	10121.4	7401.09	8747.6	12158	15621.3	15241.2	9274.56	7436.73	10464.2	19548.2	10212.9	7010.32	4906.62	8736.89	4669.17	5670.21	8019.29	11683.8	14222.7
X153.1.237	M153T237	1.0882	-0.524153	0.601463	153.127	153.127	153.131	237.107	235.084	237.921	48	20	28	7034.99	8595.26	20843	33037.8	57829.8	45195.8	14698.7	17139.4	12648.8	19766.7	25190.6	11666.6	41580.3	23067.9	17287.8	2392.45	6380.26	6058.22	4639.73	13271.6	3280.75	5440.75	5703.38	19153.7	12542.8	8231.55	20328	9314.75	10701.4	4539.25	5960.71	7252.26	18933.9	7538.14	4400.3	8093.04
X154.1.100	M154T100	1.03107	0.28422	0.776844	154.061	154.059	154.068	100.272	99.5262	101.664	95	49	46	7444.3	5031.33	7868.56	27876.1	15708.2	8237.86	14016.6	6630.81	8812.51	12054.7	14830.4	3035.25	12688.1	17327.6	20462	9665.41	5929.99	6559.95	6881.23	6191.27	6087.26	12791	8294.55	5209.89	9963.15	17180.9	13382.4	15329.9	8796.47	7037.76	6577.59	7633.64	11367.9	11581.9	5267.9	4333.44
X154.1.78	M154T78	1.11146	-0.728608	0.467963	154.069	154.068	154.073	77.9474	76.6376	84.5992	68	29	39	7039.37	10082.7	15468.9	15737.6	13339.2	12175.4	8480.23	8599.85	9953.55	4662.86	11498	7482.48	19469.4	21745.4	12899.3	7800.27	6982.84	5756.04	9438.39	4460.1	6697.18	26327	9829.88	9909.12	28607.1	10269.6	10417.2	6370.65	6204.32	15041.9	20236.1	11243.1	12904.1	5378.11	27312.9	4961.2
X154.1.69	M154T69	1.13153	1.02803	0.30681	154.084	154.082	154.088	68.6662	61.8744	71.2819	91	41	49	34260	69447.1	80001.4	88407	98719.9	35941.7	14130.7	22611.3	12277	19512.6	35703.4	19418	16118.6	42857.9	38510	50886.3	45841.4	69323.8	63506	64802.7	59812.3	16549.4	20169.3	16479	28052.2	35728.2	25584.2	22894	33813.8	56923.6	21703.7	29912.1	51553.5	58810.1	44779.9	102998
X154.1.9	M154T9	1.09351	0.443678	0.658444	154.084	154.083	154.084	9.42055	3.67088	20.8099	50	23	27	38308.7	11445.3	10553	44257.4	26619.7	30189	5832.09	11615.1	0	11426.6	8213.01	6411.41	7148.61	15783.5	0	13456.6	12299.6	14651	15439	15636.2	18004.6	37676.8	30694	7774.41	0	0	0	7296.76	12479	9514.42	5486.48	0	9914.73	14235.7	18239.3	19474.2
X154.1.154	M154T154	1.43976	0.907803	0.368241	154.086	154.085	154.093	153.521	148.572	157.009	54	27	27	14478.6	31418.4	11373.8	23791.4	33870.8	29041	11997.4	17011.3	11647.8	14118.7	15524.1	10701.1	18556.3	23585.1	25436.6	16724.9	10766.8	8633.67	16477.6	14191.2	14639.4	12823.7	14134	1481.6	16068.8	20183.8	21889.2	15848.6	12284.8	5580.43	14958.3	14819.9	16170.6	19149.7	22786	17105.3
X154.9.19	M155T19	1.22466	-1.35823	0.177898	154.88	154.878	154.883	19.4039	10.5864	21.0285	56	22	34	2657.28	7287	8481.5	15251.4	12643.9	14106.2	2503.11	3051.05	2428.44	5492.56	3906.55	4918.5	8829.13	20106.3	4473.02	8004.72	5409.04	5126.81	4291.74	5038.56	11057	436.243	5739.37	4850.87	6362.99	6092.63	10747.3	5646.61	3532.4	2788.78	1506.38	786.546	4268.61	4909.62	3720.78	539.564
X155.1.10	M155T10	1.12184	-0.974239	0.332292	155.067	155.067	155.069	10.4076	4.6709	20.8099	50	23	27	5147.83	8072.23	8262.01	28364	25446	27626.1	8889.01	6989.82	4732.67	12232.3	10873.4	13481.6	18586.5	12116.9	0	15702	17239.3	6599.69	16786.2	18296	12491	12075	12233.6	8885.06	16784.5	13037.2	0	7626.07	7380.97	9505.03	6379.04	0	21327.6	21090.8	25174.3	15612.2
X155.1.190	M155T190	1.00299	-0.0286791	0.977184	155.07	155.067	155.071	190.196	188.717	191.141	67	30	37	4362.26	4640.19	12959.8	21035.8	34918.7	25175.4	9824.88	12529.9	8999.11	11420.7	19527	11383.2	23402.2	14889.5	12148.5	8436.62	6919.46	5861.17	8776.88	8763.27	9577.47	20384.9	20638.6	9061.51	10125.2	10764.9	2103.45	8298.91	6589.2	8133.3	5828.58	5869.09	15421.3	6925.24	4172.4	12355.8
X156.1.21	M156T21	1.04643	0.43922	0.66145	156.076	156.076	156.077	20.5591	11.5864	28.3752	46	14	30	14181.9	13981.1	17604	32246.6	24289.3	24109.3	10350.8	9233.63	10458	10096.4	9169.46	10750.1	20204	35905.7	23950.9	14151.2	14780.9	13978.9	15056.7	13507.7	11165.5	14436.7	14437	12265.5	10012.5	10424.2	11574.1	10163.8	11067.9	13751.8	10826.4	11413.6	14416.9	27695.8	27604.2	2490.44
X156.1.99	M156T99	1.2172	1.24346	0.216686	156.138	156.138	156.138	99.2306	90.1929	109.129	47	14	32	16409.6	19907.6	28122.1	188363	56093	20274.2	37753.6	24718.3	26610.8	31921.2	29237.6	51293.7	90172.8	181299	115242	392047	271852	358875	356158	136321	147677	167511	146705	72195.4	34848.9	64839.5	92577.6	35267.2	60794	76296.6	83474.7	48342.2	88306.7	36063.9	184125	105861
X156.1.151	M156T151	1.66015	3.53573	0.000729444	156.138	156.138	156.139	151.471	148.056	156.473	43	15	28	11892.1	12310.4	14650.7	49708.5	31583.7	13162.6	14358.4	10363.8	15882.9	16611.3	13516.3	17129.9	34618.8	93858.7	74859.6	50423.2	30288	44640.3	60387.8	44281.8	48366.7	36261.9	37947	27755.3	22787.2	27249.9	42532.3	16812.8	26217.9	29417.7	31676.8	24260.3	33009.1	21431	55324.6	45755.7
X156.1.74	M156T74	1.33168	3.3173	0.0012794	156.139	156.137	156.141	74.405	70.1762	76.2239	85	37	48	165566	250656	254152	963972	504592	167009	331084	233955	309033	288989	305390	530452	809816	1.73863e+06	958029	1.6087e+06	1.12086e+06	1.46307e+06	1.44642e+06	1.445e+06	1.71075e+06	1.6852e+06	1.76645e+06	655887	466634	690154	862360	398113	916506	993974	690838	563670	1.30025e+06	938349	1.70086e+06	1.65173e+06
X157.32	M157T32	1.24404	1.39179	0.167074	157.013	157.01	157.017	31.731	22.3583	39.1542	104	49	51	1.78557e+06	778665	535953	1.1532e+06	876935	901067	1.13639e+06	1.60461e+06	805419	1.46473e+06	623883	798093	1.12528e+06	1.63622e+06	1.81573e+06	1.12811e+06	777038	972154	888537	1.23367e+06	1.07492e+06	1.32339e+06	1.2397e+06	1.81964e+06	679649	698166	721172	1.085e+06	2.074e+06	862387	528413	796133	10841.9	15843	15075.4	11376.6
X157.1.9	M157T9	1.48258	1.77066	0.0807956	157.083	157.082	157.084	8.96403	-1.00655	20.8099	57	22	35	4561.01	7783.88	11628.4	74007.2	40339.9	50118.3	5360.76	9274.69	0	16492	21655.1	20731.8	20794.7	51284.2	0	0	0	10181.2	10503.2	13509.5	12085	20438.1	19350.3	38247.6	0	0	0	9185.93	12162.8	15587.7	6877.7	0	11597.2	0	22356.5	19109.6
X157.1.116	M157T116	1.17135	-0.938343	0.350333	157.083	157.083	157.084	116.448	108.553	118.268	46	15	27	50164.9	22637.4	79813.5	102264	156284	61994.3	17825.5	38543.1	35848.2	41047.6	36912.2	29510.9	44222	67271.1	71043	34768.3	23785.7	38999.2	57234.8	37109.5	32644	71541	51177.1	24327.6	17930	25081.3	43278.8	27362.2	39722.7	47771.6	19920.7	17313.9	31728.1	10481	19688.6	16359.1
X157.1.74	M157T74	1.37463	2.94247	0.00404944	157.142	157.141	157.142	74.3187	69.9735	76.1139	75	30	45	16416.6	23017.7	23443.8	143271	57049.6	20828.5	33591.6	23520.4	32562.2	29642.1	29012.9	57126.2	113891	294125	164984	205819	125124	178434	189719	168216	229475	227949	241217	81426.4	50414.3	86445.2	124560	44667.6	98088.7	105194	92713.9	64392.4	142600	93578	227324	238454
X158.33	M158T33	1.17361	1.44548	0.151482	158.016	158.014	158.023	32.5296	28.5732	35.872	71	32	39	98542	23458.7	28578.7	67309	51971.8	53881.9	31845.7	68457.4	44216	55542.2	38604.5	50900.3	66296.2	90257.2	91434.6	72702.5	47098.8	90548.8	58742.6	77479.3	65283.7	79063.6	77512.9	114821	41520.2	45407.2	46777.2	64618.1	95066.8	53642.7	39534.2	45639.1	40240.9	13648.6	26895.3	9310.08
X158.1.139	M158T139	1.14179	-0.657988	0.512758	158.117	158.116	158.122	139.361	127.047	141.48	92	44	47	29854.8	32707.9	27418.1	39861.5	32971.7	22901.1	15838.1	15908.1	23650.3	35556.1	22933	10669.8	13790.8	49433.6	42948.4	9668.73	27073.3	75987.3	41786.1	30939.5	32594.3	45898.9	60114.8	44569.7	17847.8	26712.2	29866.8	19153.9	29097	36018.5	17091.1	14743.2	36221.7	17580.8	47000.3	27570.6
X158.1.74	M158T74	1.09948	1.25458	0.212695	158.144	158.143	158.145	74.3569	73.2724	76.3134	63	25	38	5498.82	5689.78	8362.66	15264.1	12586.3	8568.71	7428.86	6896.04	7824.77	10807.8	9334.06	30104	13607.8	14959.7	17552.5	12000.6	7036.34	9881.87	11918.4	10755	14088.6	11818.6	14524.1	9863.58	8569.61	10379.6	12773.7	8108.12	10461.1	6136.59	8725.3	7381.28	7788.5	5775.17	11659.7	13970.5
X158.2.371	M158T371	1.17708	-0.415334	0.678795	158.154	158.152	158.158	371.282	368.943	372.519	90	41	49	38678	29030.3	35393	35345.9	26665.7	13945.2	21757.3	21189	18334.3	57637.8	395691	296117	512338	14121.1	6207.65	16429.5	17265.4	16671.2	11843	11902	13960.4	12784	9917.84	8365.43	6418.92	19102.7	11422.6	5541.75	18729.8	7815.68	17787.2	21505.6	48044.7	59301	37453.5	31322.3
X158.2.53	M158T53	1.16749	-0.585517	0.560459	158.154	158.153	158.154	52.9794	46.4512	57.0446	42	15	27	4891.68	6507.67	9072.51	7389.06	112180	6722.15	4795.62	8140.1	2579.9	2577.48	6407.14	5273.03	14443.1	12683.6	7679.77	4336.86	4586.9	4622.44	7360.55	5556.1	7690.11	5072.29	6495.75	7317.13	6844.41	3632.5	6193.98	3519.3	5777.04	6361.14	5326.65	3968.78	5251.25	20903.3	9407.2	6969.92
X159.10	M159T10	1.13607	1.3145	0.19171	158.964	158.963	158.967	9.52841	-0.00755091	20.8099	78	34	44	2.85207e+06	1.76221e+06	1.68691e+06	3.19234e+06	2.74831e+06	1.34215e+06	1.08254e+06	1.40968e+06	0	1.8124e+06	1.66964e+06	1.6344e+06	2.04926e+06	4.06408e+06	0	3.69251e+06	3.57604e+06	3.56996e+06	3.8567e+06	3.71603e+06	4.09793e+06	5.5545e+06	3.29017e+06	1.74412e+06	0	0	2.73003e+06	1.87904e+06	3.93741e+06	3.59575e+06	1.61344e+06	0	4.25174e+06	4.1806e+06	6.3863e+06	7.08342e+06
X159.40	M159T40	1.24532	-1.14163	0.256339	159.028	159.025	159.032	39.6866	35.362	50.0183	135	50	49	153275	187618	289731	246101	521712	199944	68968.2	90579.8	99267.6	67641.9	163827	175591	63237	58877.1	30055.4	84261.5	23461.3	97387.3	145162	117192	26087.8	19984.1	39276.9	39417.4	113193	118471	80939	73978.5	45872.1	32560.5	34514.8	40623.3	424602	389145	363077	355669
X159.1.21	M159T21	1.07917	0.728451	0.468052	159.076	159.075	159.08	21.0576	12.7874	22.9537	51	18	33	5348.1	4193.69	5071.47	10457.8	7224.65	8698.39	12485.2	382.762	5507.58	24571.3	8905.26	8053.61	13147.5	24019	23517.1	11015.4	8958.4	5300.26	9118.22	10591	9972.04	4864.24	11783.8	908.709	9378.52	5721.25	6650.96	8337.91	11168.4	6902.53	9306.88	449.555	9586.52	10987.2	13961	2890.35
X159.1.128	M159T128	1.51402	-3.08992	0.00269487	159.092	159.089	159.098	128.44	124.327	136.167	100	49	50	206000	198932	372660	406908	372812	205594	194474	180832	178043	127916	199711	100373	260993	139183	251965	88702.9	46574.1	45501.3	60793.8	58441.5	45905.9	53097.5	56442.4	184434	202131	182610	249838	158026	52990.9	52872.2	109984	180635	88492.5	78059.1	96489.7	110090
X160.9	M160T9	1.13769	1.4754	0.143276	159.967	159.967	159.969	9.27957	-0.00755091	20.8099	75	30	45	56573.5	39553.1	56482.9	78576.3	74471	44314.4	47172.4	37853.8	0	48243.1	53899.2	51113.3	69584.9	135459	0	92677	76870.4	79958.9	85060.2	85637.6	93051.9	124933	77185.7	41845.2	0	0	0	96322.6	79460.6	68690	38781.8	0	92155.2	85780.4	115592	88504.3
X160.1.26	M160T26	2.05313	-3.5781	0.000549805	160.06	160.06	160.064	25.6201	17.5894	28.2418	47	13	34	912292	1.05985e+06	417545	1.54771e+06	33110.7	1.50764e+06	1.44606e+06	1.55949e+06	1.4761e+06	1.7062e+06	1.52512e+06	1.72099e+06	2.0018e+06	245919	2.28463e+06	88160.3	79805.7	91320.3	111937	104218	107677	234760	86943.7	2.07671e+06	1.43065e+06	1.40912e+06	1.89334e+06	1.8999e+06	197698	121210	1.37847e+06	1.59482e+06	418126	599873	812904	513149
X160.1.82	M160T82	1.20875	-1.46271	0.146872	160.076	160.075	160.082	81.7798	80.6453	86.6402	99	48	51	57526.8	41082	132315	182885	117097	64618.4	93309.6	55295.2	102848	58793.5	69879.6	47543.3	145981	139450	185393	62479.8	42606.9	64633	49586.8	53445.6	16832.9	25241	103783	34068.4	74712.5	92166.3	106237	93124.2	30024.9	37834.7	40179.2	53805.7	56274.5	34660.7	51327.4	12936.5
X160.1.128	M160T128_1	1.7814	-3.3637	0.00121967	160.076	160.075	160.082	128.279	124.53	130.669	89	40	49	33775	26671	51884.6	62317.8	66307.7	39555.2	30661.9	26421.3	24767.7	21098.7	28399.6	21704.9	35741.6	13831.2	35970.6	8519.1	4511.69	5808.62	5101.65	5368.68	4457.94	13537.5	6081.6	26702	12404.9	26296	35718.9	32635.4	5343.34	6060.43	9844.7	27528.2	9355.91	11486.3	8593.52	9093.03
X160.1.128.1	M160T128_2	1.23466	-1.88123	0.0632187	160.095	160.091	160.099	128.337	124.327	131.075	90	45	45	18279	30723.7	29711.9	39705.8	37237.7	23559.7	19129.9	19274.9	9041.27	20935.8	19057.4	21529.8	26620.6	13606.1	24859	12359.2	6365.38	6898.69	9900.19	7430.65	7473.28	7021.02	7578.33	20020.6	2199.4	20777.4	2773.22	2090.97	10298.9	7692.92	14048.8	19162.6	10454.2	11267.4	11055.5	11618.6
X160.1.100	M160T100	1.17619	-1.42597	0.157364	160.108	160.106	160.109	99.7556	98.7041	101.597	68	25	43	40806.5	29981	31338.8	57760.6	67469.5	31679.7	19576.9	16874.8	22864.5	21841.4	20301	21131.3	45974.9	15976.9	33078.5	36650.6	24621.2	33645	25943.7	32433.2	32045.6	63100.4	65703.6	29790.2	22601	28675.2	36079.7	25096.8	20517	19149.8	16093.1	14434.6	18401.2	13999.5	24242.9	18238.7
X160.1.183	M160T183	1.00901	0.0704456	0.94398	160.133	160.132	160.137	182.858	177.721	186.279	92	43	49	33798.1	21578.5	42364.8	66795.8	42192.4	45074.6	12586.5	32485.9	30180.2	17496.9	26978.6	10397.3	34769.6	45677.4	38726.9	9241.59	103683	36647	28988.2	35892.2	40994.9	54480.6	22767.2	84295.5	12336.5	35129.7	30290	25318.7	34368.6	84795.6	56498.9	16499.6	42688.2	17260.6	25751.3	28032.4
X160.1.22	M160T22	1.49941	-2.45541	0.0159294	160.133	160.133	160.134	22.393	14.9884	24.6375	66	23	43	716950	677113	593910	999605	786100	759543	1.22807e+06	1.43773e+06	1.31206e+06	1.53784e+06	1.24482e+06	1.28051e+06	1.45074e+06	793297	1.84095e+06	485208	236632	275990	151064	83464.8	256052	152833	397273	1.729e+06	970203	846346	1.11921e+06	1.07529e+06	285590	230101	1.20929e+06	1.40757e+06	278142	372229	706725	1239.64
X161.10	M161T10	2.25513	-1.91484	0.059329	160.968	160.967	160.971	9.53869	-0.00755091	20.8099	77	32	45	632589	1.01278e+06	26273	41847.5	1.28704e+06	20964.5	813973	391864	0	48162.4	648771	200211	1.38548e+06	44907.9	0	31831.8	36655.3	30426.8	30781.7	33515.7	41417.6	50820	28729.1	755503	0	0	0	683706	29569.1	33780.4	419708	0	33450.6	31855.9	34973.2	48608.9
X161.11	M161T11	1.09609	0.390678	0.696877	161.023	161.02	161.028	10.7484	-0.00755091	20.8099	50	23	27	561541	894801	1.02949e+06	33970.4	1.19451e+06	349657	390412	339045	80115.8	43151.2	599305	173581	1.21858e+06	7813.46	0	49160.8	50420.7	536446	825348	200761	36919.1	183488	610150	662869	220138	44190.8	0	119171	935358	748808	383794	0	66089.2	99252.6	70688.2	132768
X161.91	M161T91	1.46103	2.99203	0.00363697	161.044	161.044	161.048	91.0027	89.9192	96.3621	50	13	34	22615.8	3762.92	20707.1	32983.9	39666.8	45005.6	13646.6	34695	18571.7	23890.7	16145.3	30278.2	31781.5	33598.2	38831.2	25918.8	22102.9	36781.5	30010	37664.2	48368.4	40050.6	33370.3	26313.3	18031.7	26914.1	23163.6	22174	47956.8	30390.9	15610.4	21961.1	8829.51	6951.38	1968.57	2030.9
X161.1.82	M161T82	1.15554	-1.49477	0.13836	161.079	161.076	161.083	81.783	74.2608	86.8423	73	33	39	7513.42	7292.69	15610.7	21198.7	19317.2	16367.2	16169.1	12243.1	13053.7	14115.2	11534.4	9774.91	17534.8	20113.9	20396.8	11415.8	6121.08	9718.44	9184.99	7453.82	5383.16	16333.8	24527.6	7912.74	24390.1	10657.8	13464.4	10053.3	6319.55	4980.18	7197.55	6950.4	9248.96	5480.36	6488.08	4483.02
X161.1.22	M161T22_1	1.78999	-2.5533	0.012395	161.092	161.091	161.092	21.9839	14.1884	23.8397	38	12	26	48020.2	36240.4	32973.7	69505.9	51954.4	52608.6	86309.5	100142	80946.3	123770	79470.1	80625.9	92206.4	9843.12	182762	38620.1	21615.9	5805.92	8841.28	5501.9	4904.93	10711.1	4986.4	139297	58693.1	47519.3	71997.8	74162.7	4464.92	2962.19	83361.9	115591	20807.2	25017	6163.25	1867.19
X161.1.394	M161T394	1.04179	-0.238293	0.812152	161.096	161.094	161.103	394.369	392.667	396.816	97	46	51	46812.6	25482.3	24325.7	81593.6	65255.6	73341.9	16062.6	45606.2	21331.2	19307.9	51104.2	15436.1	2478.95	28608.9	35086.9	10857.6	9143.2	12650.5	19745.2	17889.4	20945.3	15658.6	15091	12240.9	15184.3	13225.1	19839.1	16251.8	13750.5	11979	9377.03	10903.3	7524.31	11115.5	5357.31	3194.05
X161.1.428	M161T428	2.07989	-2.7767	0.00666505	161.096	161.094	161.101	428.182	427.069	430.736	94	45	49	253587	150651	65966.7	450380	516729	242824	148526	116319	284112	334760	234536	4781.21	16998.5	49792.5	205517	16824.6	18346.8	18805.6	20785.4	19053.8	14211.2	25211.8	24162.4	134257	305576	168291	379897	146454	27214.8	25643	133056	286231	37347.4	54182.1	58388.9	46834.4
X161.1.468	M161T468	1.05125	-0.266871	0.790156	161.096	161.094	161.103	467.647	466.151	469.948	85	41	44	36113.9	19551.6	11896.3	37955.8	77437.5	40997.1	11876.7	37861.3	11685.7	21585.1	21295.6	9299.52	12895.2	22157.9	22612.1	7428.2	8329.66	7670.43	6074.54	5415.88	7050.21	10589.7	11701.7	14116.4	15766.7	11520.2	18154.3	13139.2	9364.5	8885.54	16315.2	10837.5	3634.92	4899.81	4389.71	2361.4
X161.1.183	M161T183	1.17057	-1.89987	0.0603618	161.136	161.135	161.137	182.614	177.578	186.279	48	20	28	4695.72	4349.89	7143.64	12539.7	12628.2	10871.8	5513.5	8129.15	6366.79	8344.57	9987.79	3696.76	10232.5	4696.67	10150.9	2538.18	8861.73	3451.84	2857.79	4283.84	4075.99	4751.39	8003.96	9786.41	6181.36	7167.75	7526.1	5189.8	5463.99	7397.68	7222.01	4593.96	6862.69	4525.51	3086.79	2935.95
X161.1.22.1	M161T22_2	1.48688	-2.26876	0.0257879	161.136	161.135	161.137	22.3528	14.5884	23.8397	60	22	37	45078	37385.4	32585.4	61875	51103.4	50711.6	82644.1	81554.8	75732.2	101668	76704.1	83228.5	92787.6	65925.7	177327	36992.3	17695.1	18786.1	12870.5	7009.07	20101.3	6731.18	29125.9	139729	60088.8	48154.7	72266.2	80266	21870.3	18069.9	80860.7	106696	19587.8	23362.6	29404.1	1247.74
X161.6.77	M162T77	2.27951	1.54633	0.127862	161.597	161.596	161.597	76.727	75.2757	83.7896	39	10	29	3095.78	2814.06	5007.41	3326.81	7475.85	5646.96	1802.97	2151.69	4680.45	2208.9	3730.6	2498.35	3383.51	11906.6	3806.04	25849.2	2312.01	14655.3	7591.06	5791.47	7094.07	18978.4	10617.3	4009.9	5382.15	5727.98	6831.99	5219.51	6045.34	3291.71	4335.95	2656.73	778.155	853.466	598.97	537.253
X162.1.82	M162T82	1.30827	1.20861	0.229665	162.058	162.057	162.061	81.712	80.6417	86.2336	59	24	35	16635.8	19721.5	26394.1	22830.2	24077.6	18747.8	15004.5	16220.2	11596.9	10246	18246.2	6322.63	28550.4	17614.9	25532.8	10181.7	8414.5	15729.2	13569.8	24834	7144.94	20639.3	14196.5	13897.2	19416.2	7171.94	17384.8	6549.58	5851.51	156854	7455.7	23854.2	6183.3	6776.76	10840	5332.66
X162.1.23	M162T23	1.02871	0.118426	0.905974	162.076	162.075	162.076	23.2511	21.7904	25.4375	48	19	29	74819.3	382433	327204	317877	463158	112597	132506	117127	137988	82010.6	217467	248609	567603	37577	346178	30785.1	24339.9	28683.4	32011.3	24888.8	26595.5	14810.7	138676	359222	271440	210707	324428	338597	15928.5	14359.9	233989	277922	34555.9	37842.7	673861	2023.42
X162.1.428	M162T428	2.28913	-3.13795	0.0023455	162.099	162.098	162.102	428.279	427.04	430.268	55	24	31	29619.8	16995	8189.01	62021.1	74866.7	28301.4	16907.2	28390.9	29787.8	38547	27045.2	2149.66	3932.94	7022.65	60578.2	3707.39	2903.89	2493.32	4232.92	2852.01	3015.62	4351.32	3084.56	35538.2	39911.1	41676.6	46422	40702.4	5056.7	4416.36	33202.7	31730.1	5285.65	6759.93	6340.31	4985.6
X162.1.21	M162T21	1.22276	1.57289	0.119156	162.113	162.112	162.115	20.997	12.5874	28.3843	79	33	46	131269	435007	471074	557721	320433	210385	251830	243917	226226	270284	247744	242714	588779	820833	576050	268883	326897	544406	286049	425046	501550	14307.4	565270	359372	267438	203915	37998.4	332185	348741	382657	256235	332538	493523	602836	653942	2718.63
X162.9.569	M163T569	1.09461	0.478312	0.633472	162.907	162.906	162.907	569.092	562.733	574.28	44	15	27	27.6082	0	4635.99	20460.9	8942.72	830.267	6434.3	4050.2	8019.89	9143.12	21635.2	20305.1	24244	65710	6865.56	13763.6	15743.6	13519.2	7596.75	12242.8	10694.2	35819.2	32626.1	17025.9	18353.2	13709	14139.8	22637.9	26335	24278.5	9889.63	6527.13	5757.46	7376.62	6927.64	6208.12
X162.9.9	M163T9	1.10745	0.64483	0.520538	162.941	162.94	162.941	9.07543	-0.00755091	19.6421	50	22	28	3871.37	5296.9	1772.34	10335.1	4825.33	5732.17	11846.7	14305.5	0	9872.98	9589.9	10660.6	18757.7	0	0	0	0	1757.39	1564.42	1561.81	1958.28	22140.5	16845.2	2481.59	0	0	0	13941.5	9653.66	7029.52	8975.48	0	18086.4	22723.7	20207.6	0
X163.10	M163T10	1.15139	1.03972	0.300982	163.018	163.016	163.02	9.54241	-0.00755091	20.8099	63	26	37	95359.1	161195	178419	210154	316894	192103	191640	180352	0	118356	163973	125041	390666	31655.1	0	0	0	80388.3	123703	38171.6	9148.32	388522	512459	132953	0	58535.1	0	194040	170783	149139	151462	0	306931	455837	411835	349276
X163.144	M163T144	1.1636	-1.49687	0.137759	163.042	163.039	163.046	144.175	143.42	144.992	93	45	48	12358.4	15473.5	22597	23612.3	25235.2	28447.4	12171.5	6971.33	14137.1	11012	21065.3	3691.69	17506.9	6616.05	18936.2	8138.22	3007.9	5092.14	18020.7	6480.67	3737.75	18882.3	2765.9	6597.41	9275.17	8446.83	12413.2	13129.9	6992.81	5531.76	9164.04	7960.46	4456.07	9049.22	12615.1	7840.64
X163.1.21	M163T21_1	1.0518	0.457422	0.648372	163.06	163.059	163.066	21.3503	12.9874	23.0542	83	32	45	12603.4	31693.9	32777.9	49092.2	31720.5	17815.4	4974.27	14758.3	6914.5	56279.9	14674.6	28522.7	26319	36854.8	53883.3	19164.5	43204.4	16084	29045	23821.5	27137.3	6635.82	26613.9	31559.1	31062	17766.1	27664.5	47878.2	23977.4	16342.4	19062.5	28414.4	19077.4	25552.8	25507.4	4025.97
X163.1.466	M163T466	1.01237	0.0992913	0.921106	163.076	163.075	163.082	465.592	463.369	467.495	92	45	47	4375.54	10889	36138.2	18502.4	46928.5	24260.5	22263.5	23517.4	9049.16	12359.4	12864	11994.4	472060	382083	446374	251728	241668	233646	228894	246368	206109	312824	270729	78244.8	184934	102345	232295	415550	273232	171585	262555	268117	176539	452365	428679	254213
X163.1.355	M163T355	1.16968	0.379136	0.705452	163.075	163.074	163.083	355.5	349.87	357.185	95	43	45	1.00042e+06	43342	45005.7	93320.1	1276.32	331945	289820	43363.8	12679	14364.3	612683	487582	32654.9	13783.9	635180	29671.5	38993.1	31692.4	27903.7	31362.5	68560.3	38714	23357.9	8955.04	11044.1	486203	557139	413885	12336.8	6880.97	10239.9	45367.9	14198.1	11139.8	12315.8	6499.39
X163.1.46	M163T46	1.19582	1.335	0.186024	163.086	163.085	163.087	45.8671	38.34	54.9065	55	26	24	7166.24	9207.31	19586.3	17727.7	10999.3	13486.2	7426.02	4802.12	9553.94	18465.6	17975.6	9391.35	10408.2	5497.13	10592.5	5402.48	4926.12	5806.5	6284.49	5356.4	3555.52	7615.59	4973.08	10962	6117.27	10717.1	7565.33	9235.47	16184.9	3205.16	7069.91	5056.91	8396	6932.51	7800.06	11679.5
X163.1.359	M163T359	1.29094	2.87306	0.00503488	163.112	163.11	163.115	358.97	357.163	360.01	85	36	49	1.23352e+06	818000	663364	1.00461e+06	540611	1.0267e+06	318683	659189	753618	839019	682425	566669	703222	1.51088e+06	758244	970011	761184	1.26353e+06	1.15751e+06	1.15176e+06	1.47918e+06	1.61824e+06	1.57739e+06	541675	446247	534858	629163	463101	1.40239e+06	1.3968e+06	679980	683920	774666	636110	479616	680130
X163.1.476	M163T476	1.29939	-1.12497	0.263636	163.112	163.111	163.116	475.662	473.382	477.353	68	35	33	70371.3	27161	5767.97	9225.07	35221	76185.5	6708.8	72551.2	9028.58	9545.91	6745.88	7287.36	23885.9	17107.2	11011.6	6829.01	4613.8	5555.77	5545.34	4923.06	6394.14	10490.2	14215.2	9656.43	12887.5	11311.6	10931.6	19694.6	5763.01	5307.26	4078.41	14281.1	5155.2	5354.27	3483.82	10412.5
X163.1.21.1	M163T21_2	1.04076	0.296661	0.767345	163.116	163.115	163.116	20.8808	12.5874	22.4844	56	20	36	16054.2	30887	31912	47968.5	50759.7	16791.9	32565.5	23421.5	22596.8	32268	22679.1	28560.8	53758.1	159063	50410	31824	36116.5	37498.2	21097.6	27301.1	45572.9	5350.61	37398.9	30798.7	31162.6	17053.7	26355.5	38703.6	24657.7	25057	19299.8	32053.1	30486.4	54313	60393.8	4061.98
X163.1.51	M163T51	1.01593	0.115523	0.908266	163.123	163.122	163.123	50.7969	44.0195	57.7289	69	28	41	18049.7	30830.3	53406.1	40185.2	25385.4	28114.7	41085.9	17648.6	33751.9	61058.2	63293.3	14420.6	36375.9	32146.2	24740.7	38991.4	44420.9	94174.9	68520	32244	20500.6	31921.4	52079.4	16523.1	17853.1	21359.5	16846.2	19802	40568.2	5276.92	16694.2	11130.3	26237.6	14956.8	57360.5	56104.2
X163.1.268	M163T268	2.26409	2.75524	0.00773791	163.133	163.132	163.134	267.875	264.857	268.748	74	29	45	27147.5	59250.3	58003.1	72449.5	124501	64376.3	21022.5	35636.5	72252.7	91293.3	129479	30063.4	25739.6	40645.2	25008.2	88546.3	34950.8	68494.6	19444.8	18525.5	23893.6	53714.1	46417.7	12269.4	8779.85	9219.69	17229	11804.4	17017.1	24599.3	220679	34120.3	321759	45486.6	279808	272709
X164.10	M164T10	1.05035	-0.385609	0.700608	164.021	164.021	164.022	9.82456	-1.00655	20.8099	50	22	28	26399.6	16926.8	23133.4	35462.2	18788.6	15551	13744.8	11360.7	0	9446.4	9393.11	8429.88	19864.2	0	0	2242.85	2206.41	5276.43	8068.55	3633.59	3050.29	21947	24940.7	18019.4	4442.82	4042.81	0	13542.1	10702.7	10878.2	9494.91	0	14545.5	26849.8	26771.5	28958.1
X164.1.315	M164T315	1.05392	0.710339	0.479152	164.071	164.07	164.071	314.834	313.131	315.819	41	14	27	4477.11	3447.51	4766.09	8802.07	6538.28	4533.17	4666.16	6143.24	4682.7	7403.4	5063.17	5184.4	7262.72	9284.78	6748.48	5617.82	5128.8	6114.66	3752.05	5852.38	7076.82	7474.48	5222.91	6353.92	4246.52	6476.92	7802.54	5279.85	3769	6142.1	4769.07	3752.04	3174.11	4029.17	3560.1	2394.35
X164.1.77	M164T77	1.20248	1.0598	0.291792	164.074	164.073	164.078	76.9148	75.2669	79.1109	75	30	45	10888.8	7267.96	6268.09	19974.7	12251	19521.8	8646.26	13575	9120.19	19079	35567.6	16972.5	27162.3	20991.2	14198.8	5656.49	8021.22	21942	25133.9	11111.5	10947.4	22564.9	11097.7	8978.83	19984.5	12600.3	17005.9	7195.65	10201.8	11807.4	12329.2	39659.4	18080.2	6984.34	11169.3	24804.7
X164.1.466	M164T466	1.04558	0.406789	0.685039	164.079	164.076	164.083	465.665	463.17	467.947	82	38	44	4900.98	5077.18	5533.62	6908.3	9362.92	8889.08	4410.56	4770.01	2996.57	3653.02	4110.06	4250.51	51478.1	20258.6	45614.8	29015.3	29225.8	25310.8	25052.4	25464.8	22624.7	32413.3	30546	20658.7	10838	21090.2	26695.4	22583.2	28399.1	19880	15272.7	13710.5	18622.4	40814.9	39220.5	26366.2
X164.1.359	M164T359	1.29926	2.14141	0.0348831	164.115	164.115	164.116	358.899	357.163	360.01	75	30	45	268188	105014	74601.4	200351	259086	170813	36759.5	273617	116320	172562	98326.9	76838.1	110171	241865	117243	117101	94920.3	172445	153019	152533	270271	257908	242311	76050	58529.7	72462.3	92133.1	61984	232902	221015	107059	110530	79271.7	72263.2	50643.3	65842.9
X164.1.268	M164T268	1.89635	2.54509	0.0136097	164.136	164.135	164.137	268.148	264.845	268.951	52	23	29	4630.38	6452.95	6912.71	9300.89	13397.6	9139.86	4025.73	5446.72	7876.07	9894.71	12118.5	5252.26	5079.53	4765.25	5353.08	8618.83	3949.52	6476.51	3917.52	3711.56	3557.43	6107.41	4663.23	5532.38	20167.9	7981.27	5728.57	13430.1	3335.38	3435.95	19781.2	8854.8	27307.5	4703.21	20647.7	22528
X164.9.18	M165T18	1.04088	0.202578	0.839885	164.93	164.927	164.932	18.124	16.2921	20.4845	63	27	36	57172	33217.4	29633.6	54304.7	68542.9	47527.5	1688.74	22220.2	20099.5	8693.43	27074.3	67582.4	58761.4	7784.12	20260.2	11375.5	16732.4	8458.95	17358.6	28205.7	9527.19	1139.81	9696.45	17804.1	20604.2	19653.4	32827.8	12634	12924.1	10161.8	23109.9	5865.43	13222.1	20631.2	5731.29	0
X165.33	M165T33	1.37922	1.96695	0.0520372	165.039	165.037	165.041	32.5259	29.2534	35.972	41	12	29	13426.8	11875.2	8304.28	10363.7	8918.28	10092.1	8676.98	12796.7	10695.6	12008	12669.5	21167.2	21859.5	47904.2	18021.2	28491.4	25720.4	30997.4	25049.6	25779.1	30648.2	24530	21420	18511.5	12185.7	13884	17682.3	24909.7	62627.5	21501.7	11520.3	12722.4	3890.91	3179.27	3048.05	3752.98
X165.1.60	M165T60	1.09595	0.961158	0.338831	165.055	165.052	165.059	60.0541	52.0396	63.2212	144	48	51	565581	750010	810598	1.95762e+06	1.01133e+06	872106	615635	517985	526285	504062	615264	185156	648135	791484	725692	860546	664115	805349	627139	499935	552280	1.06306e+06	582323	276329	290986	653918	320327	165484	692528	692044	268634	253210	587025	645436	436865	792224
X165.1.394	M165T394	1.33547	-2.37156	0.0196544	165.055	165.053	165.057	394.309	392.766	396.472	47	17	30	8392.95	10440.6	10980.9	13833.3	19243.1	28923.7	13627.5	9322.25	13574.2	6172.78	9787.56	10133.6	28982.9	5779.6	16258.7	8463.11	9668.62	2573.29	3507.43	14094.7	4679.56	3661.74	9242.59	7941.41	12840.2	11889.3	12545	8638.91	9831.38	2651.31	5527.12	6686.05	8685.58	10347.5	13069.5	12868
X165.1.392	M165T392	1.21325	-1.95718	0.053147	165.076	165.075	165.076	391.555	390.257	393.472	73	29	44	14568.2	11751.2	14269.9	23947.6	24543.6	36182.7	15473.8	18740.6	15419.3	12933.2	22279.3	11258.1	32475.8	16393.4	16727.9	7929.35	6977.89	7353.54	8048.15	10493.6	10122.8	8173.75	7201.69	12232.8	13423	12307.9	13132.6	9119.15	6356.73	4666.18	5852.87	7096.23	9087.61	8558.22	11006.3	11759.9
X165.1.22	M165T22	1.10936	1.08439	0.280809	165.075	165.075	165.076	22.2313	14.3884	23.5966	49	18	31	1134.35	1476.4	1554.39	3471.88	2451.97	2470.33	10746.1	5266.39	5865.17	8025.13	6420.74	7247.3	5009.48	14988.1	9162.03	8468.11	7499.92	14935.9	17083.8	18001.8	17419	2976.92	9606.52	8646.3	5670.57	4635.05	6061.89	8097.04	13151.9	7583.92	5327.26	5674.57	11731	10935.6	7650.28	7258.49
X165.1.51	M165T51	5.01678	-8.93541	6.83897e-14	165.087	165.086	165.087	50.6493	44.6295	53.5285	43	0	43	141376	297709	400703	551874	402216	253018	4556.46	213416	254118	123300	193842	138055	264711	248922	617511	666434	481660	642730	477610	386338	444455	12469	11159	19403.2	168222	188317	254386	127562	184681	215026	120865	294997	254253	386836	298220	468824
X165.1.80	M165T80	1.10472	1.45867	0.14784	165.112	165.111	165.113	80.0038	79.0474	86.0315	75	30	45	19543.7	19999.5	33136.1	35180.8	35563	28761.8	16421.8	19757.9	24015.3	28532.2	29981.5	13130.7	25332.1	26662	39823.2	21313.6	18048.1	19741.8	32786.5	20823	21530.9	32104.8	22176.5	19850.9	16546.2	21720.3	23077.2	22821.2	28249.3	25732.6	17560.2	18114.8	15198.6	18192.4	27603.6	12178.7
X165.1.359	M165T359	1.10472	0.854313	0.39498	165.118	165.117	165.119	358.685	357.171	360.01	62	22	40	18394.7	8851.76	11495	23587.8	28511.9	20979.8	8937.15	29581.1	14136.9	19277.7	19645.1	10636.2	28314.3	15127.9	12493	8966.99	6047.46	10777	10215.7	10745.8	18804.4	14013.3	16525.4	8745.09	10382.5	9534.17	12354.9	7240.81	16182.7	13642.6	9483.71	10159.4	4747.69	4896.7	3392.5	4763.97
X165.6.80	M166T80	1.19051	2.75853	0.00693654	165.614	165.613	165.615	79.9956	79.0829	85.8288	50	19	31	2575.76	3012.18	4959.74	5569.79	4230.51	4187.18	2242.51	2429.6	3351.67	3771.86	4729.6	1981.26	3238.88	4968.12	5692.59	3738.67	2705.84	4741.71	6642.66	3983.81	4534.1	6094.84	3584.27	3254.12	2382.89	3834.59	2589.43	3615.13	5418.88	4946.15	2510.25	2044.5	2698.95	3471.89	4272.42	2383.05
X166.150	M166T150	1.33356	3.23513	0.00168653	166.05	166.047	166.054	149.646	148.683	151.255	98	48	50	35631.6	35325.1	38707.4	47138.8	62909.4	49310	23713.8	28532.6	33405.4	11215.2	12064.3	10944.8	17558.1	84179.7	40182.9	56594	45293.1	49312	51287.5	53650.9	42245.5	32427	33487.3	29768.9	39836.4	44571	16642.2	20274.9	43459.3	52401.9	23295.6	12636.6	16989.3	36653.7	33222.1	11595.2
X166.229	M166T229	1.47799	-2.5411	0.0129909	166.05	166.049	166.05	228.883	226.938	230.719	59	22	37	33800.9	16863.5	33054.2	21989.5	29705.5	24766.6	19159.3	13201.9	16014.7	15320.3	22010.5	16119.1	24802.6	8918.86	26538	7195.04	6581.32	6392.7	6464.95	6571.2	6799.81	4692.32	5458.12	14478.7	16017.5	18679.8	19027.8	16012.1	3908.35	6905.77	18698.1	16054.8	4933.55	3598	3690.39	4455.98
X166.1.60	M166T60	1.10494	1.05126	0.295709	166.058	166.055	166.062	60.044	52.3443	64.2222	137	50	51	49443.1	70773.7	98180	186778	133658	78066.8	57439.9	47933	45740.5	15654.4	39380.7	20792.5	54158.6	68285	100243	79723	60900.6	73476.2	57732.4	49265.3	52192.6	90019.2	55436.7	27609.3	25628.4	24287.2	85822.6	28527.1	64761.4	61742.5	26875.3	21294.5	46477.9	58831.5	38654.6	95539.5
X166.1.50	M166T50	1.05844	0.740592	0.46068	166.072	166.069	166.076	49.5738	42.7997	54.1127	96	46	50	20178.6	18684.1	17702.2	30908.3	34029.3	19548.6	22802.6	14812.8	9570.39	30082.3	31144.4	17513.8	33050.8	62846.9	35392.1	25866.2	14773.7	38387.1	39249.2	31683.5	23658.6	36063.2	30351.7	17087.3	8431.52	19271.6	23730.3	10839.3	22594.7	22404.1	15329.3	971.394	29773.6	34223	31122.4	27281.5
X166.1.95	M166T95_1	1.07517	1.44829	0.150666	166.088	166.085	166.092	94.9687	92.8486	97.5869	101	50	51	1.32518e+06	1.42315e+06	1.58251e+06	2.01586e+06	1.81715e+06	1.44696e+06	991950	1.10623e+06	1.26274e+06	1.04518e+06	1.0787e+06	1.09214e+06	106797	1.76425e+06	1.26035e+06	1.69849e+06	1.64081e+06	1.73645e+06	1.67506e+06	1.63983e+06	1.64321e+06	1.83466e+06	1.6807e+06	973099	1.00933e+06	1.12674e+06	1.20774e+06	956802	1.62784e+06	1.74623e+06	902553	1.00531e+06	1.8395e+06	2.00765e+06	1.83749e+06	1.91506e+06
X166.1.335	M166T335	1.2539	1.65922	0.100261	166.087	166.085	166.091	334.919	333.283	336.2	86	39	47	24372.7	42872.8	67324.5	201777	171305	33204.4	20308.5	26182	23887	52708.8	22931.4	14817.2	63729.5	359364	38312.6	204538	190115	176680	187724	109276	135932	113440	109566	69386.4	54582.5	63303.7	102060	103024	78495.7	141739	85956.7	77500.5	89494.1	168667	81134.7	41233.4
X166.3.95	M166T95_2	1.50876	2.10446	0.0382025	166.26	166.258	166.261	94.8026	92.6298	97.3842	46	11	35	5568.46	8598.12	17392.8	43398.1	36710.6	18480.5	6945.64	3415.85	5551.24	7368.28	6769.3	2045.57	3121.08	29358.7	17933	11908.4	10922.6	12564	9470.69	7961.55	9699.88	16067.8	6180.65	7127.56	6248.95	9999.85	11433	8595.24	13750.7	11020.8	2863.37	3663.62	3280.29	4121.15	4037.57	4095.34
X166.4.95	M166T95_3	1.56238	2.10202	0.0384798	166.431	166.43	166.439	94.6867	92.6298	97.3842	65	27	38	3964.55	7047.68	25272.8	51967.5	44529.3	24284.8	8438.57	2631.85	4143.46	9435.58	8322.04	3578.32	5457.09	26716.1	20958.4	14810.2	14445.6	18270.1	15259.9	10674.2	12246.2	22774.1	8103.75	12885.9	10676.6	19346.1	20309.4	13394.1	23847.9	14129.6	2794.09	4005.77	1995.82	2943.32	2956.56	2641.43
X166.5.95	M166T95_4	1.36723	-0.76052	0.449171	166.479	166.478	166.48	94.7211	92.6298	97.3842	51	20	31	3730.41	6096.46	15011.3	76444.8	54886	15351.4	2403.34	1859.67	2708.34	2735.63	3031.07	1584.03	2417.76	2936.92	48694.6	2154.22	2457.96	2430.09	1633.89	1420.25	1517.9	2562.2	1098.71	2132.13	2143.23	3698.59	4626.6	3573.18	1761.89	1330.7	1831.01	1755.23	1261.16	1341.22	1016.32	1533.42
X167.10	M167T10_1	1.38685	-1.30594	0.194882	167.013	167.012	167.013	9.89014	-0.00755091	19.8109	42	13	29	80911.5	83173.1	78230.3	26560.9	50134.1	42607.6	92575.5	19285.5	0	10417.6	73260.9	45494	118488	0	0	15225.8	0	18014.1	18763.8	16737.2	13395.3	12173.7	16613.8	82227.6	0	15130.2	0	111013	16732.7	24015.1	54112.2	0	12276	15427.3	14453.1	9596.36
X167.1.150	M167T150	1.10885	-1.18007	0.24126	167.053	167.052	167.054	149.573	148.494	150.482	50	18	32	4829.12	4682.58	9034.52	13132.8	16086.5	12323.4	6144.86	8246.13	5712	7614.27	10850	3472.81	12729.4	7989.49	6946.41	4945.06	6313.27	4399.6	5066.04	4574.64	3816.62	8000.31	8532.96	6516.01	7003.53	7638.18	8491.79	6611.14	4109.42	5454.21	5063.36	5401.66	5536.87	3562.22	2857.65	3311.54
X167.1.83	M167T83	1.05549	-0.204697	0.838226	167.056	167.054	167.061	83.2018	82.1911	84.8641	67	31	36	4272.92	13684.5	11797.7	175114	20384.2	114847	40949.5	14184.7	11460.8	64871.2	45928.9	10190.8	133271	7665.12	20300.7	49819	22722.4	5669.03	24331.9	8680.66	284979	5250.64	26215.6	47366.2	9351.91	30545.1	9634.57	144486	7734.69	10492.8	167941	66287.3	24318.9	12570.3	10775.6	60225.4
X167.1.91	M167T91	1.14548	-0.59127	0.555701	167.056	167.056	167.061	90.9331	87.5827	92.0983	68	32	36	175628	221827	17748.7	3754.64	279681	279840	240875	2665.33	25467.3	191556	165889	83212.5	298631	8489.17	505553	34443	749096	12629.2	69540.5	705148	136061	8741.41	38009.8	76395.1	194508	38891.1	32611.6	302733	20437.7	525722	195852	23725.1	208617	21814.1	50005.2	53515.8
X167.1.10	M167T10_2	1.23412	-1.57217	0.119317	167.067	167.067	167.068	9.5353	4.1531	20.8099	63	28	35	4514.05	9349.74	8308.84	32264.8	17418.9	15100.4	6035.13	5549.93	0	7502.03	12020.1	10371.3	14065.9	22413	0	7252.05	9075.6	7762.08	12605.4	10642.9	9762.23	13231.4	11000.5	9234.34	0	0	0	18356.4	22601	20148.3	8053.3	0	19028.5	23199.8	26895.5	26212.1
X167.1.418	M167T418	1.01972	-0.110127	0.912538	167.07	167.069	167.078	418.402	416.895	420.424	94	46	48	118956	68257.5	39789.8	84364	137247	84332.2	62138.5	72984.1	57437.7	40978.2	98331.8	54304.4	96302.7	111645	76704.8	47530.8	34261.9	41818.3	23805.5	21415	22182.3	54228.7	54723	30073.1	28602.7	30320.4	32011.8	16819.4	31046.5	44757.2	32025.6	32867.2	10021.2	18892.5	7921.45	17806.5
X167.1.335	M167T335	1.28802	-1.91323	0.0592714	167.09	167.089	167.091	334.991	333.283	336.2	69	28	41	10761.1	28245	36094	45868.3	64231.5	47975.7	22812.4	22019.4	21602.7	26693.6	32772.9	21309.5	26889.8	29881.2	29342.7	19037.1	19117.4	16540.8	18775.8	11220.4	13065	12054.3	10889.1	19324.1	18305.6	18956.1	25402.1	22628.6	8124.72	13442.6	16114.2	13115.6	8884.3	14994.4	7815.41	5392.07
X167.1.34	M167T34	1.0883	0.84252	0.401545	167.091	167.09	167.092	34.1189	33.0174	35.6888	50	22	28	4069.7	6271.7	4324.87	13185.2	7735.61	7242.78	12112.6	7194.51	3772.57	4152.78	4820.02	5639.21	10422.8	18597.3	13296.3	13100.6	9815.73	10155.4	14171	10811.8	11309	17007.4	14377.6	4972.12	4725.39	4834.21	6839.32	3654.27	6230.45	3545.94	5182.93	6631.5	20464.4	14704.6	13504	12675.3
X167.1.95	M167T95	1.16495	2.1541	0.033703	167.09	167.089	167.097	94.8238	92.6298	97.3842	96	45	51	372079	464981	582960	765397	702280	460791	330968	349177	394843	316639	340377	288786	474426	965436	594270	749900	732956	782615	755882	705469	697274	909185	668071	356819	361649	421107	437469	362801	665020	753114	123315	345871	795121	886259	920465	950455
X168.1.78	M168T78	1.12354	-1.06343	0.290194	168.063	168.059	168.064	78.4278	76.8777	84.3965	49	21	26	15098.8	10736.7	16920.3	30795.1	26940.7	21539	15159.8	10101	16824.8	17466.9	15552.5	11075.4	19635.3	15286.8	18485.2	3494.96	9529.87	6532.91	7817.19	6758.25	26636.2	4977.33	11537.4	12156.9	14137.5	13700.7	14479.5	20496.7	8245.71	7291.05	16042.7	13210.9	5778.22	12104.9	13032.9	8620.02
X168.1.95	M168T95	1.17205	2.56422	0.0119796	168.092	168.091	168.096	94.7148	92.6639	97.3842	76	31	45	26066.1	33501	40296.1	67738.9	62715.4	40963.4	25753.3	25533.5	28908.6	30202.8	28436	24186.9	39455.8	68622.8	46579.1	51424.8	50957.6	53704.3	46256.3	45507.7	46010.7	59001.1	40505.6	28421.3	31606	34549.3	35743.5	29370.8	45036.6	51194.4	23094.2	22761	45148.6	56602.2	53565.1	53413.1
X168.1.207	M168T207	2.00034	-1.38192	0.170324	168.102	168.101	168.105	206.648	205.884	208.492	49	17	32	334573	21301.6	38221.5	779680	15032.7	28684.9	86104	432985	609911	3635.94	4910.49	3324.12	5788.19	5204.15	685095	4393.52	3173.74	4136.55	13759.2	4973.48	4053.6	7677.1	4164.95	3570.11	42805.4	343813	608520	597951	45472.7	3128.26	4451.01	4986.38	29012.7	22727.3	12250	4095.51
X169.38	M169T38	1.14435	1.26083	0.210428	169.036	169.035	169.043	38.4728	34.1928	40.0345	88	44	44	600171	280975	277380	441418	27497.3	18510.9	1.5362e+06	265225	331486	25319.9	240399	419813	753944	1.89025e+06	757990	625339	528882	838225	231870	292576	280929	1.11741e+06	728722	940379	532987	404734	384503	454934	320966	392957	233429	226593	501649	921388	635936	449358
X169.30	M169T30	1.00417	0.0361572	0.971233	169.036	169.035	169.043	30.3302	26.527	32.8966	63	37	26	396449	223446	16372.1	431106	493628	288998	6498.91	292335	491810	400308	445705	453587	491538	1.73614e+06	787059	277089	177942	311473	446686	309886	200218	360309	262317	360749	319129	268703	884224	243113	264126	222996	235552	618207	347935	844217	442887	117994
X169.1.20	M169T20	1.17504	1.23211	0.220876	169.058	169.058	169.061	20.1642	11.7874	21.5966	52	16	36	21507.9	19335.8	24208.5	32073.7	22535.5	22990.5	17583	23387.7	11735.6	18340.1	13316.9	15938.1	35868.3	71433.6	39558.9	13189.6	17069.9	31788.8	12616.4	25672.2	51576.9	4461.49	26208.6	16925.3	16343.5	18728.9	19221.7	19805.4	19580.8	20058.6	13891.7	10188.6	10095.1	8515.21	16898.1	8054.6
X169.1.184	M169T184	1.07248	0.317979	0.751276	169.086	169.085	169.09	183.567	181.713	185.121	51	19	32	10050.1	8143.72	173776	312252	798261	349065	84640.9	93632.3	91475.8	117283	4215.78	59042.1	220986	179685	99233.3	54696	67587.8	69367.4	72588.7	90458.6	71482.7	234774	200311	91262.6	67535.6	38524.7	88340.4	19062.6	42114.6	42467.3	10845.5	30263	130044	18763.6	23610.9	20241.6
X169.1.99	M169T99	1.33133	-2.87337	0.00515617	169.097	169.094	169.101	98.5161	86.3413	101.232	89	43	44	25687.3	8815.65	13879.2	30461.7	35863	16927.3	17169.8	12886	14610	27427.1	33657.1	7603.64	21359.9	28718.2	10282.5	7472.53	7921.23	14257.6	16602.5	25059.9	13838.1	13582.1	13078.3	11645.8	11368.5	12343.4	17090.8	15630.3	3083.17	7197.26	10210.5	10766.7	9773.45	15111.5	8106.06	9240.38
X169.1.196	M169T196	1.43558	-1.51885	0.132236	169.12	169.119	169.124	196.041	194.976	197.808	60	23	37	17966.6	9459.29	79300.9	40670.1	68056.4	164124	40937.5	13965.3	11276.5	54493.9	95265.9	30348.9	106589	14399.1	48626.2	8730.25	32740.6	9503.14	15855.4	15523.5	16046.2	14747.7	15322.6	44961.3	36704.4	22632.4	54200	13663.3	11063.4	11367.5	7805.15	15004.9	65246.7	2978.42	3292.13	4382.51
X169.1.102	M169T102	1.55947	-3.06135	0.00290953	169.133	169.132	169.135	102.44	100.954	109.152	47	15	31	17809.1	8612.92	17437.5	39069	45341.6	28998.4	17804.3	14890.8	17000.3	27498.4	39607.4	14140.3	28756	7973.63	15510.7	5947.11	10770	4893.93	5206.64	26104.4	19498.4	4764.9	4626.17	12216.4	11634.3	12723.3	22629.2	16237.4	10163.1	4436.4	11522.9	11797.5	3247.65	14349.5	4183.96	3968.21
X170.19	M170T19	1.21126	-0.940453	0.34953	169.986	169.984	169.993	19.3434	16.2158	20.8906	55	25	30	8522.96	5458.36	6551.32	44208.7	57145.2	7369.36	16964.4	13136.2	9837.27	14265.1	11704.8	12523.5	10521.7	4680.24	26382.6	4057.37	5822.39	2882.93	9804.24	2986.24	4127.59	1729.82	2528.46	4279.18	12048.6	17055.4	5847.72	10835	12031.7	2232.86	3690.43	9235.91	4730	4366.75	37215.8	2738.35
X170.36	M170T36	1.2248	-1.4545	0.149129	170.038	170.036	170.042	35.8856	26.3536	40.0602	97	31	42	77450.7	83497.6	82706.3	125681	82741	103023	90886.1	93480.9	22786.1	115472	29065.2	68836.9	3178.8	186378	209840	41447.8	34599.5	51987.9	31867.8	34931.8	15479.8	62814.6	22643.4	1395.06	24768.2	89098.7	74023.3	83107.4	16847.9	24186.9	93976.9	64202.8	28553.8	44311.8	56818.6	15765.7
X170.1.300	M170T300	1.19273	-1.60476	0.111769	170.051	170.049	170.052	299.708	298.163	300.678	56	25	31	16421.4	5448.75	4776.59	25168.6	17608.6	17434.6	7208.04	7151.33	6533.34	8175.21	9092.87	3503.95	6912.39	9623.7	8619.33	13587.5	10983.7	12012	10007.9	11171.4	13634.2	7931.89	8406.05	5156.45	5147.14	6002.16	6277.94	5831.04	6031.29	6238.61	7859.14	6991.71	4013.31	6101.86	3181.03	3746.67
X170.1.128	M170T128	2.35682	-3.54207	0.000683588	170.06	170.059	170.064	128.22	124.53	130.875	89	41	48	170639	176188	319051	371283	343168	198235	160130	162876	166050	124595	164791	93726.4	248892	49075.6	253805	24966.7	13778.3	13242.5	17782.7	16863	12528.4	16251.6	16977.5	174114	181484	180601	228326	148376	15344.6	16925.4	115086	173979	29901.7	26997	29658.7	32832
X170.1.74	M170T74	1.55088	2.58995	0.0112261	170.065	170.059	170.066	73.5546	69.2781	82.7785	68	28	39	9653.18	14376.9	16264.1	50415.4	18076.3	18173.9	9660.82	5971.1	8667.42	31398.7	20629.2	15903.7	41841.6	46004.6	65509.2	68670.1	46797.2	69535.8	35337.4	52911.7	72998.7	21881.8	28220.9	32428.4	37680.8	51341.7	44433.3	58502.4	71506	67442.2	31814.5	25988.8	7839.3	7007.99	6008.64	3066.13
[truncated: 4,466 more rows]
[truncated: 69 more columns]

## Sheet: TableS8 integrated GHB peakarea
	SAMPLE NUMBER	concentration (mg/kg)	logCon	GHB manually intergration	XCMS GHB	logGHB	IS	z_norm	nomis		BHB detected or not	BHB manually intergration
TX1	1	28	1.44716	230901	231267	5.36411	227838	-0.178417	4.88492	231267	YES	32004
[truncated: 50 more rows]

## Sheet: Table S9_Z_normalization
name	M105T51	M197T15	M99T16	M257T16	M112T16	M129T16	M204T17	M147T17_1	M147T17_2	M203T17	M146T17	M243T17	M107T17	M123T18	M125T18	M191T18	M165T18	M181T18	M247T18	M219T19	M249T19	M251T19	M217T19_2	M235T19	M233T19	M267T19	M243T19	M281T19	M265T19	M209T19	M239T19	M115T19	M113T19	M117T19	M223T19	M225T19	M255T19	M241T19	M409T19	M425T19	M207T19	M283T19	M227T19	M257T19	M141T19	M99T19	M367T19	M83T19	M97T19
[truncated: 102 more rows]
[truncated: 3,874 more columns]

[truncated: 1 more sheets: Table S10_NOMIS]
